# Supplementary material
Source: PubMed Central journal article supplement (PMC4687740)
Supplement: NIHMS744133-supplement-1.pdf [file NIHMS744133-supplement-1.pdf]

# Supporting Information for Heterogeneous H-Bonding in a Foldamer Helix

Brian F. Fisher, Li Guo, Brian S. Dolinar, Ilia A. Guzei, Samuel H. Gellman

---

## Table of Contents

- I. Materials and Instrumentation**
  - II. Synthesis**
    - a. General Procedures
    - b. Compound Nomenclature Notes
    - c. Synthesis
  - III. Tetramer Crystal Structures**
  - IV. 2D-NMR**
    - a. 2D-NMR Experimental
    - b. 2D-NMR Resonance/ROESY Distance Assignment Procedures
    - c. Model Helices
    - d. Resonance Assignments and NOESY/ROESY-Derived Interproton Distances of **2a**, **S11**, **4**, **5**, and **S12**
    - e. NOE Pattern Analysis
    - f. NMR-Restrained Simulated Annealing Calculations of **2a**, **S11**, **4**, **5**, and **S12**
  - V. DMSO Titrations**
  - VI. Hydrogen-Deuterium Exchange**
  - VII. 12/10- and 12-Helix <sup>1</sup>H-NMR Comparisons**
  - VIII. Helix Structural Parameters**
  - IX. SI References**
  - X. NMR Spectra**
    - a. <sup>1</sup>H-NMR Spectra
    - b. <sup>13</sup>C-NMR Spectra
    - c. 2D-NMR Spectra
  - XI. Crystallographic Data**
-

## I. Materials and Instrumentation

### Materials and Reagents

Most solvents and reagents used were obtained from Sigma-Aldrich. Amino acids and coupling reagents were obtained from Chem-Impex. International, Inc. Silica column chromatography was performed using Sigma-Aldrich technical grade silica gel, pore size 60 Å, 40-63 µm mesh size. Automated silica column chromatography was performed on a Biotage SP1 HPFC system using 10g SNAP cartridges. TLC was performed using SiliCycle Siliaplate glass-backed TLC plates, 60 Å pore size, 250 µm thickness, F-254 indicator. Visualization of TLC plates was performed with 254 nm UV light, ninhydrin stain (1.5 g ninhydrin in 100 mL butanol and 3 mL AcOH), KMnO<sub>4</sub> stain (1.5 g KMnO<sub>4</sub>, 10 g K<sub>2</sub>CO<sub>3</sub>, and 1.25 mL 10% NaOH in 200 mL H<sub>2</sub>O), PMA stain (10% PMA in EtOH), or I<sub>2</sub> stain (a few crystals of I<sub>2</sub> in a jar of silica gel).

### NMR Spectrometers

This material is based upon work supported by the National Science Foundation and National Institutes of Health under the following grant numbers. Any opinions, findings, and conclusions or recommendations expressed in this material are those of the authors and do not necessarily reflect the views of the National Science Foundation.

| NMR Spectrometer      | Grant                             | Award year |
|-----------------------|-----------------------------------|------------|
| Bruker AC-300         | NSF CHE-9208463                   | 1993       |
|                       | NIH S10 RR08389-01                | 1993       |
| Varian Mercury-300    | NSF CHE-034299                    | 2003       |
| Varian INOVA-600      | NIH 1 S10 RR13866-01              | 2000       |
| Bruker Avance III-400 | NSF CHE-1048642                   | 2010       |
| Bruker Avance III-500 | Generous gift from Paul J. Bender | 2012       |

### Mass Spectrometers

| Mass Spectrometer      | Grant           | Award year |
|------------------------|-----------------|------------|
| Bruker REFLEX-II MALDI | NSF CHE-9520868 | 1995       |
| Waters Micromass LCT   | NSF CHE-9974839 | 1999       |

## II. Synthesis

### a. General Procedures/Nomenclature

#### 1. General procedure 1: Amide coupling

Boc-protected amino acid or peptide is pre-activated by stirring at 0.1M in DMF or CH<sub>2</sub>Cl<sub>2</sub> with coupling reagent (EDCI-HCl), coupling additive (HOBT, HOAt, Oxyma Pure, or DMAP), and DIEA for 15 min. Mixture is added to Boc-protected α- or γ-amino ester and stirred overnight. After completion, mixture is diluted with EtOAc and the organic phase is washed with 0.5 M HCl, 5% LiCl, saturated aqueous NaHCO<sub>3</sub>, and brine. The

organic phase is dried with Na<sub>2</sub>SO<sub>4</sub>, concentrated *in vacuo*, and crude product is purified by silica column chromatography.

## 2. General procedure 2: Boc deprotection

To Boc-protected amino ester or peptide is added 4.0 M HCl in dioxane. Mixture is stirred until completion as determined by TLC, and solvent is evaporated under a stream of N<sub>2</sub>. Crude product is diluted with CH<sub>2</sub>Cl<sub>2</sub> and solvent is removed again (2x). Remaining CH<sub>2</sub>Cl<sub>2</sub> is removed under high vacuum and crude product is used without further purification.

## 3. General procedure 3: Benzyl ester hydrogenolysis

Boc-, benzyl ester-protected  $\gamma$ -amino acid or peptide is dissolved in EtOH to 0.1 M. 10 wt% Pd/C is added ( $\approx$ 10 mg Pd/C per 30 mg amino acid) under N<sub>2</sub>. The reaction vessel is purged of air *in vacuo* and refilled with N<sub>2</sub>. The reaction vessel is equipped with a balloon of H<sub>2</sub> and stirred at room temperature for 5 hr. The reaction mixture is filtered through a bed of Celite and concentrated *in vacuo* to produce a white solid, which is used without further purification.

### b. Compound Nomenclature Notes

| Abbrev.           | Full name                                                                                     |
|-------------------|-----------------------------------------------------------------------------------------------|
| <b>EDCI-HCl</b>   | N-(3-dimethylaminopropyl)-N-ethylcarbodiimide hydrochloride                                   |
| <b>HOBt</b>       | 1-hydroxybenzotriazole                                                                        |
| <b>Oxyma Pure</b> | ethyl 2-cyano-2-(hydroxyimino)acetate                                                         |
| <b>DIEA</b>       | diisopropylethylamine                                                                         |
| <b>DMF</b>        | dimethylformamide                                                                             |
| <b>EtOAc</b>      | ethyl acetate                                                                                 |
| <b>HOAt</b>       | 1-hydroxy-7-azabenzotriazole                                                                  |
| <b>HATU</b>       | 1-[bis(dimethylamino)methylene]-1H-1,2,3-triazolo[4,5-b]pyridinium 3-oxid hexafluorophosphate |
| <b>DMAP</b>       | 4-dimethylaminopyridine                                                                       |

Compounds not appearing in the main text are numbered separately, with the letter “S” preceding the numbering of these compounds.

Only syntheses of one enantiomer are described for compounds in which both enantiomers were used. For simplicity, the enantiomer is designated by the configuration of the  $\alpha$ -amino acid in the  $\alpha/\gamma(\mathbf{I})$ -peptide that incorporates that compound. Thus, “**L-xx**” would be compound number **xx** that would be used in an  $\alpha/\gamma(\mathbf{I})$ -peptide incorporating an L- $\alpha$ -amino acid and (*S,S,R*)- $\gamma(\mathbf{I})$ , and “**D-yy**” would be compound number **yy** that would be used in an  $\alpha/\gamma(\mathbf{I})$ -peptide incorporating a D- $\alpha$ -amino acid and (*R,R,S*)- $\gamma(\mathbf{I})$ .

### c. Synthesis

#### L-S2 – Boc-[(S,S,R)-EtACHA]-OBn

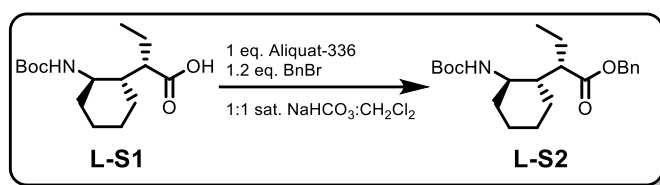

Compound **L-S2** was synthesized according to previously reported methods.<sup>S1</sup> Boc-amino acid **L-S1** (1.14 g, 3.98 mmol) was dissolved in a 1:1 binary mixture of CH<sub>2</sub>Cl<sub>2</sub> and saturated aqueous NaHCO<sub>3</sub>. Aliquat-336 (1 eq., 1.61 g, 3.98 mmol) and benzyl bromide (1.2 eq., 568  $\mu$ L, 4.78 mmol) were added, and the reaction mixture was stirred at room temperature for 16 hr. The reaction mixture was extracted three times with CH<sub>2</sub>Cl<sub>2</sub>, and the combined organic layers were washed with brine. The organic layer was dried over Na<sub>2</sub>SO<sub>4</sub>, filtered, and concentrated *in vacuo* to yield a pale yellow viscous oil. This residue was purified *via* silica column chromatography eluting with 7:1 hexanes/EtOAc to yield 1.33 g **L-S2** as a colorless viscous oil (3.54 mmol, 89% yield). **TLC** R<sub>f</sub> = 0.47 (4:1 hexanes/EtOAc, ninhydrin stain) **<sup>1</sup>H NMR** (400 MHz, CDCl<sub>3</sub>)  $\delta$  7.41 – 7.28 (m, 5H), 5.16 (d, *J* = 12.4 Hz, 1H), 5.11 (d, *J* = 12.6 Hz, 1H), 4.33 (d, *J* = 10.0 Hz, 1H), 3.39 (qd, *J* = 10.6, 3.7 Hz, 1H), 2.50 (dt, *J* = 9.1, 4.6 Hz, 1H), 2.03 – 1.92 (m, 1H), 1.77 – 1.51 (m, 5H), 1.42 (s, 9H), 1.35 – 0.95 (m, 5H), 0.85 (t, *J* = 7.3 Hz, 3H). Small peaks (integration  $\approx$  0.15) were identified as rotamers with gradient 1D-NOESY with 2 s mixing time.<sup>S2</sup> **HRMS** *m/z* (ESI): calc. for [C<sub>22</sub>H<sub>33</sub>NNaO<sub>4</sub>]<sup>+</sup> ([M+Na]<sup>+</sup>) 398.2302, found 398.2318.

#### L-S3 – Boc-[<sup>L</sup>Phe][(S,S,R)-EtACHA]-OBn

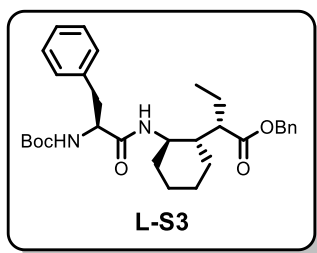

Boc-, benzyl ester-protected cyclic  $\gamma$ -amino ester **L-S2** (1.33 g, 3.54 mmol) was deprotected at the N-terminus according to **General Procedure 2**. The amine-deprotected salt was coupled according to **General Procedure 1** to Boc-L-phenylalanine (2 eq., 1.88 g, 7.08 mmol) using EDCI-HCl (2 eq., 1.36 g, 7.08 mmol), HOBt (2 eq., 1.28 g, 7.08 mmol), and DIEA (6 eq., 3.70 mL, 21.2 mmol) stirring at room temperature for 16 hr. Crude yellow viscous oil product was purified by silica column chromatography eluting with 4:1 hexanes/EtOAc to yield **L-S3** as 1.61 g white foam (3.09 mmol, 87% yield). **TLC** R<sub>f</sub> = 0.36 (3:1 hexanes/EtOAc). **<sup>1</sup>H NMR** (300 MHz, CDCl<sub>3</sub>)  $\delta$  7.42 – 7.12 (m, 10H), 5.43 (d, *J* = 9.6 Hz, 1H), 5.12 (d, *J* = 12.3 Hz, 1H), 5.07 (d, *J* = 12.5 Hz, 1H), 4.20 (q, *J* = 8.2 Hz, 1H), 3.68 (q, *J* = 9.9 Hz, 1H), 3.12 – 2.89 (m, 2H), 2.37 (dd, *J* = 10.5, 3.7 Hz, 1H), 1.68 – 1.47 (m, 7H), 1.38 (s, 9H), 1.31 – 0.91 (m, 5H), 0.81 (t, *J* = 7.3 Hz, 3H). **HRMS** *m/z* (ESI): calc. for [C<sub>31</sub>H<sub>43</sub>N<sub>2</sub>O<sub>5</sub>]<sup>+</sup> ([M+H]<sup>+</sup>) 523.3167, found 523.3154.

### L-1a – Boc-([<sup>L</sup>Phe])[(*S,S,R*)-EtACHA]<sub>2</sub>-OBn

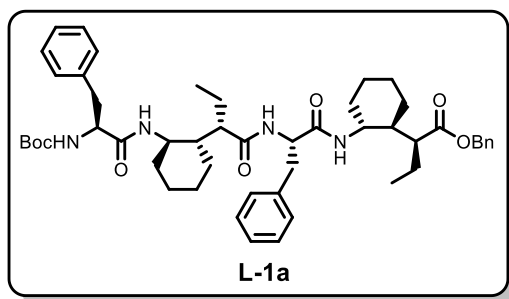

Boc-, benzyl ester-protected dipeptide **L-S3** (523 mg, 1.00 mmol) was Boc-deprotected at the N-terminus according to **General Procedure 2**. Separately, another amount of **L-S3** (1 eq., 523 mg, 1.00 mmol) was benzyl-deprotected at the C-terminus according to **General Procedure 3**. The two components were coupled according to **General Procedure 1** with EDCI-HCl (1 eq., 192 mg, 1.00 mmol), HOAt (1 eq., 1.68 mL from 0.6 M in DMF stock solution, 1.00 mmol), and DIEA (3 eq., 523  $\mu$ L, 3.00 mmol) stirring at room temperature for 16 hr. Purification was carried out with silica column chromatography eluting with 2:1 hexanes/EtOAc to yield **L-1a** as 427 mg white foam (0.510 mmol, 51% yield). **TLC**  $R_f$  = 0.22 (2:1 hexanes/EtOAc, PMA stain). **<sup>1</sup>H NMR** (500 MHz, CDCl<sub>3</sub>)  $\delta$  7.40 (d,  $J$  = 7.7 Hz, 1H), 7.38 – 7.04 (m, 15H), 6.28 – 6.23 (m, 1H), 5.56 (d,  $J$  = 9.6 Hz, 1H), 5.12 (d,  $J$  = 12.3 Hz, 2H), 5.07 (d,  $J$  = 12.5 Hz, 1H), 4.49 (q,  $J$  = 7.8 Hz, 1H), 4.17 (q,  $J$  = 9.7, 8.6 Hz, 1H), 3.66 (qd,  $J$  = 10.6, 3.7 Hz, 1H), 3.57 (qd,  $J$  = 11.0, 4.0 Hz, 1H), 3.13 – 2.88 (m, 4H), 2.44 (d,  $J$  = 10.9 Hz, 1H), 2.18 (d,  $J$  = 11.6 Hz, 1H), 1.90 (d,  $J$  = 10.9 Hz, 1H), 1.66 – 1.45 (m, 11H), 1.39 (s, 9H), 1.31 – 0.85 (m, 10H), 0.81 (t,  $J$  = 7.2 Hz, 3H), 0.73 (t,  $J$  = 7.1 Hz, 3H). **HRMS**  $m/z$  (ESI): calc. for [C<sub>50</sub>H<sub>69</sub>N<sub>4</sub>O<sub>7</sub>]<sup>+</sup> ([M+H]<sup>+</sup>) 837.5161, found 837.5138.

### L-S4 – Boc-[<sup>L</sup>Ala][(*S,S,R*)-EtACHA]-OBn

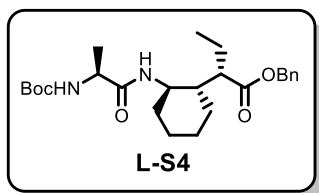

L-Alanine benzyl ester 4-toluenesulfonate salt (85 mg, 0.24 mmol) was coupled according to **General Procedure 1** to Boc-L-alanine (4.1 eq., 2.36 g, 12.5 mmol) using EDCI-HCl (3.6 eq., 2.08 g, 10.9 mmol), HOAt (3.6 eq., 18.1 mL from 0.6 M in DMF stock solution, 10.9 mmol), and DIEA (3.6 eq., 1.89 mL, 10.9 mmol) stirring at room temperature for 12 hr. Crude yellow viscous oil product was purified by silica column chromatography eluting with 3:1→2:1 hexanes/EtOAc to yield **L-S4** as 1.01 g white foam (2.26 mmol, 75% yield). **TLC**  $R_f$  = 0.34 (2:1 hexanes/EtOAc). **<sup>1</sup>H NMR** (400 MHz, CDCl<sub>3</sub>)  $\delta$  7.43 – 7.28 (m, 5H), 5.91 (d,  $J$  = 9.7 Hz, 1H), 5.13 (d,  $J$  = 12.4 Hz, 1H), 5.10 (d,  $J$  = 12.4 Hz, 1H), 5.03 – 4.93 (m, 1H), 4.10 – 4.01 (m, 1H), 3.76 (qd,  $J$  = 10.7, 4.0 Hz, 1H), 2.42 (d,  $J$  = 10.4 Hz, 1H), 1.97 – 1.88 (m, 1H), 1.75 – 1.46 (m, 7H), 1.41 (s, 9H), 1.35 – 1.05 (m, 6H), 0.81 (t,  $J$  = 7.3 Hz, 3H). **HRMS**  $m/z$  (ESI): calc. for [C<sub>25</sub>H<sub>38</sub>N<sub>2</sub>O<sub>5</sub>Na]<sup>+</sup> ([M+Na]<sup>+</sup>) 469.2673, found 469.2664.

### D-S5 – Boc-[<sup>D</sup>Ala][(R,R,S)-EtACHA]-OBrBn

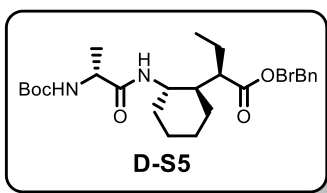

Boc-, benzyl ester-protected dipeptide **D-S4** (186 mg, 0.416 mmol) was benzyl deprotected at the C-terminus according to **General Procedure 3**. To benzyl ester-deprotected product dissolved to 0.1 M in DMF as added Cs<sub>2</sub>CO<sub>3</sub> (1.2 eq., 163 mg, 0.499 mmol) and 4-bromobenzyl bromide (1.2 eq., 125 mg, 0.499 mmol). The mixture was stirred for 16 hours, then diluted with EtOAc, the organic phase washed with 10% aqueous citric acid, saturated aqueous NaHCO<sub>3</sub>, and brine. The organic phase was concentrated *in vacuo* to yield 189 mg crude **D-S5** (0.36 mmol, 87% yield) which was used without further purification. **TLC** R<sub>f</sub> = 0.60 (1:1 hexanes/EtOAc).

### 1b – Boc-([<sup>D</sup>Ala][(R,R,S)-EtACHA])<sub>2</sub>-OBrBn

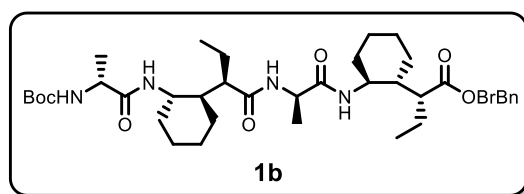

Boc-, benzyl ester-protected dipeptide **D-S5** (189 mg, 0.36 mmol) was Boc-deprotected at the N-terminus according to **General Procedure 2**. Separately, **D-S4** (1 eq., 161 mg, 0.36 mmol) was benzyl-deprotected at the C-terminus according to **General Procedure 3**. The two components were coupled according to **General Procedure 1** with EDCI-HCl (1.2 eq., 84 mg, 0.44 mmol), HOBt (1.2 eq., 60 mg, 0.44 mmol), and DIEA (1.5 eq., 94 μL, 0.54 mmol) stirring at room temperature for 24 hr. Crude product was purified via silica column chromatography eluting with 1:1 EtOAc:hexanes to yield 220 mg **1b** as a white solid (80% yield). **TLC** R<sub>f</sub> = 0.18 (1:1 hexanes/EtOAc, PMA stain). <sup>1</sup>H NMR (300 MHz, CDCl<sub>3</sub>) δ 7.49 (m, 2H), 7.29 (d, *J* = 7.4 Hz, 1H), 7.20 (m, 2H), 6.62 (d, *J* = 9.5 Hz, 1H), 6.03 (d, *J* = 9.6 Hz, 1H), 5.13, 5.10 (AB, *J*<sub>AB</sub> = 12.7 Hz, 2H), 4.99 (d, *J* = 6.7 Hz, 1H), 4.46 (p, *J* = 7.2 Hz, 1H), 3.84 (p, *J* = 7.0 Hz, 1H), 3.71 (qd, *J* = 10.3, 3.8 Hz, 2H), 2.48 (m, 1H), 2.27 (m, 1H), 2.08 (m, 1H), 2.04-1.01 (m, 26H), 0.82 (m, 6H). **HRMS** *m/z* (ESI): calc. for [C<sub>38</sub>H<sub>59</sub>BrN<sub>4</sub>O<sub>7</sub>Na]<sup>+</sup> ([M+Na]<sup>+</sup>) 786.8355, found 786.8326.

### 1c – Boc-([<sup>D</sup>Ala][(R,R,S)-EtACHA])<sub>2</sub>-OBn

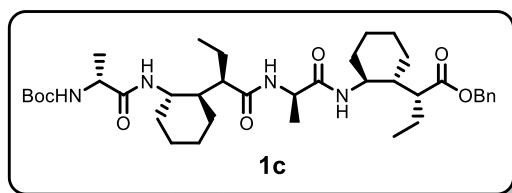

Boc-, benzyl ester-protected dipeptide **D-S5** (357 mg, 0.80 mmol) was Boc-deprotected at the N-terminus according to **General Procedure 2**. Separately, another amount of **D-S5** (1 eq., 357 mg, 0.80 mmol) was benzyl-deprotected at the C-terminus according to **General Procedure 3**. The two components were coupled according to **General Procedure 1** with EDCI-HCl (1.2 eq., 184 mg, 0.96 mmol), HOBt (1.2 eq., 130 mg, 0.96 mmol), and DIEA (2 eq., 280  $\mu$ L, 1.61 mmol) stirring at room temperature for 24 hr. Crude product was purified via silica column chromatography eluting with 1:1 EtOAc:hexanes to yield 438 mg **1b** as a white solid (80% yield). **TLC**  $R_f$  = 0.19 (1:1 hexanes/EtOAc, PMA stain).  **$^1\text{H NMR}$**  (400 MHz,  $\text{CDCl}_3$ )  $\delta$  7.42 – 7.29 (m, 5H), 6.74 (d,  $J$  = 9.7 Hz, 1H), 6.09 (d,  $J$  = 9.5 Hz, 1H), 5.20 (d,  $J$  = 12.6 Hz, 1H), 5.16 (d,  $J$  = 12.7 Hz, 1H), 5.03 (d,  $J$  = 6.5 Hz, 1H), 4.49 (p,  $J$  = 7.3 Hz, 1H), 3.84 (p,  $J$  = 7.0 Hz, 1H), 3.79 – 3.58 (m, 2H), 2.52 – 2.45 (m, 1H), 2.29 (d,  $J$  = 11.3 Hz, 1H), 2.10 (d,  $J$  = 13.0 Hz, 1H), 2.00 (d,  $J$  = 12.7 Hz, 1H), 1.92 (d,  $J$  = 10.2 Hz, 1H), 1.83 – 1.50 (m, 12H), 1.40 (s, 9H), 1.38 – 1.03 (m, 14H), 0.84 (t,  $J$  = 7.3 Hz, 3H), 0.78 (t,  $J$  = 7.2 Hz, 3H). **HRMS**  $m/z$  (ESI): calc. for  $[\text{C}_{38}\text{H}_{60}\text{N}_4\text{O}_7\text{Na}]^+$  ( $[\text{M}+\text{Na}]^+$ ) 707.4355, found 707.4326.

### S6 – Boc-[Val][(S,S,R)-EtACHA]-OBn

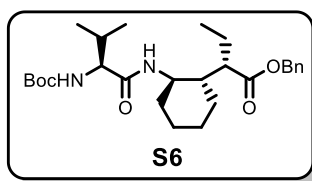

Boc-, benzyl ester-protected cyclic  $\gamma$ -amino ester **L-S2** (1.13 g, 3.00 mmol) was deprotected at the N-terminus according to **General Procedure 2**. The amine-deprotected salt was coupled according to **General Procedure 1** to Boc-L-valine (3.6 eq., 2.36 g, 10.9 mmol) using EDCI-HCl (3.6 eq., 2.08 g, 10.9 mmol), HOAt (3.6 eq., 18.1 mL from 0.6 M stock solution in DMF, 10.9 mmol), and DIEA (3.6 eq., 1.89 mL, 10.9 mmol) stirring at room temperature for 16 hr. Crude yellow viscous oil product was purified by silica column chromatography eluting with 4:1 hexanes/EtOAc to yield 1.42 g white solid **S6** (2.98 mmol, 99% yield). **TLC**  $R_f$  = 0.53 (2:1 hexanes/EtOAc).  **$^1\text{H NMR}$**  (400 MHz,  $\text{CDCl}_3$ )  $\delta$  7.40 – 7.28 (m, 5H), 5.81 (d,  $J$  = 9.6 Hz, 1H), 5.18 – 5.03 (m, 3H), 3.86 – 3.69 (m, 2H), 2.45 (dt,  $J$  = 10.9, 3.4 Hz, 1H), 2.21 – 2.06 (m, 1H), 1.99 – 1.89 (m, 1H), 1.77 – 1.41 (m, 5H), 1.40 (s, 9H), 1.34 – 1.01 (m, 5H), 0.94 (d,  $J$  = 6.7 Hz, 3H), 0.91 (d,  $J$  = 6.9 Hz, 3H), 0.81 (t,  $J$  = 7.3 Hz, 3H). **HRMS**  $m/z$  (ESI): calc. for  $[\text{C}_{27}\text{H}_{42}\text{N}_2\text{NaO}_5]^+$  ( $[\text{M}+\text{Na}]^+$ ) 497.2986, found 497.2986.

### S7 – Boc-([<sup>L</sup>Val][(S,S,R)-EtACHA])<sub>2</sub>-OBn

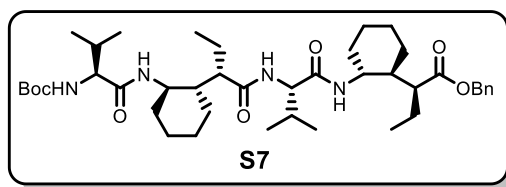

Boc-, benzyl ester-protected dipeptide **S6** (528 mg, 1.11 mmol) was Boc-deprotected at the N-terminus according to **General Procedure 2**. Separately, another amount of **S6** (1.2 eq., 632 mg,

1.33 mmol) was benzyl-deprotected at the C-terminus according to **General Procedure 3**. The two components were coupled according to **General Procedure 1** with EDCI-HCl (1.2 eq., 255 mg, 1.33 mmol), HOAt (1.2 eq., 2.22 mL from 0.6 M in DMF stock solution, 1.33 mmol), and DIEA (2 eq., 387  $\mu$ L, 2.22 mmol) stirring at room temperature for 16 hr. Purification was carried out with silica column chromatography eluting with 2:1 hexanes/EtOAc to yield 547 mg **S7** as a white foam (0.738 mmol, 66% yield). **TLC**  $R_f$  = 0.49 (1:1 hexanes/EtOAc, PMA stain).  **$^1\text{H NMR}$**  (400 MHz,  $\text{CDCl}_3$ )  $\delta$  7.43 – 7.27 (m, 5H), 7.11 (d,  $J$  = 8.6 Hz, 1H), 6.46 (d,  $J$  = 9.6 Hz, 1H), 5.84 (d,  $J$  = 9.5 Hz, 1H), 5.17 (d,  $J$  = 12.5 Hz, 1H), 5.13 (d,  $J$  = 12.6 Hz, 1H), 5.00 (d,  $J$  = 7.9 Hz, 1H), 4.20 – 4.11 (m, 1H), 3.83 – 3.66 (m, 2H), 3.63 (t,  $J$  = 7.7 Hz, 1H), 2.50 (dt,  $J$  = 10.0, 3.9 Hz, 1H), 2.32 (d,  $J$  = 11.4 Hz, 1H), 2.23 – 2.11 (m, 1H), 1.97 (dt,  $J$  = 33.3, 12.3 Hz, 6H), 1.77 – 1.53 (m, 9H), 1.43 (s, 9H), 1.36 – 1.01 (m, 7H), 1.06 – 0.88 (m, 13H), 0.86 (t,  $J$  = 7.2 Hz, 3H), 0.80 (t,  $J$  = 7.3 Hz, 3H). **HRMS**  $m/z$  (ESI): calc. for  $[\text{C}_{42}\text{H}_{69}\text{N}_4\text{O}_7]^+$  ( $[\text{M}+\text{H}]^+$ ) 741.5161, found 741.5156.

### S8 – Boc-[<sup>L</sup>Val]-OBn

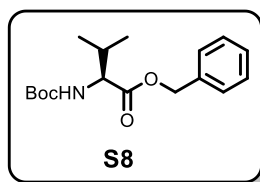

Boc-L-valine (1.09 g, 5.00 mmol) was dissolved to 0.1 M in DMF. To this solution was added  $\text{Cs}_2\text{CO}_3$  (1 eq., 1.63 g, 5.00 mmol) and benzyl bromide (0.95 eq., 564  $\mu$ L, 4.75 mmol). The reaction mixture was stirred for 12 hr at room temperature, after which it was washed with 0.5 M aqueous HCl, 5% aqueous LiCl, saturate aqueous  $\text{NaHCO}_3$ , and brine successively. The organic layer was dried over  $\text{Na}_2\text{SO}_4$ , filtered, and concentrated *in vacuo* to yield 1.78 g **S8** as a clear viscous oil which was used without further purification.

### 2a – Boc-([<sup>L</sup>Val][(*S,S,R*)-EtACHA]<sub>2</sub>[<sup>L</sup>Val]-OBn

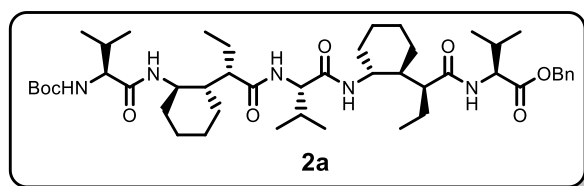

Boc-L-valine benzyl ester **S8** (3 eq., 92 mg, 0.300 mmol) was Boc-deprotected at the N-terminus according to **General Procedure 2**. Separately, tetrapeptide **S7** (74 mg, 0.10 mmol) was benzyl-deprotected at the C-terminus according to **General Procedure 3**. The two components were coupled according to **General Procedure 1** with EDCI-HCl (1.2 eq., 23.0 mg, 0.120 mmol), HOAt (1.2 eq., 200  $\mu$ L from 0.6 M in DMF stock solution, 0.120 mmol), and DIEA (4 eq., 66  $\mu$ L, 0.400 mmol) stirring at room temperature for 16 hr. Purification was carried out with silica column chromatography eluting with 2:1 hexanes/EtOAc to yield 33 mg pentapeptide **2a** as a white foam (0.39 mmol, 39% yield). **TLC**  $R_f$  = 0.49 (1:1 hexanes/EtOAc, PMA stain).  **$^1\text{H NMR}$**  (500 MHz,  $\text{CDCl}_3$ )  $\delta$  7.93 (d,  $J$  = 8.6 Hz, 1H), 7.75 (d,  $J$  = 6.2 Hz, 1H), 7.41 – 7.29 (m, 5H), 6.76 (d,  $J$  = 9.1 Hz, 1H), 5.79 (d,  $J$  = 9.6 Hz, 1H), 5.24 (d,  $J$  = 12.3 Hz, 1H), 5.09 (d,  $J$  = 12.3 Hz, 1H), 4.97 (d,  $J$



= 8.0 Hz, 1H), 4.61 (dd,  $J = 8.6, 5.4$  Hz, 1H), 3.88 (t,  $J = 8.0$  Hz, 1H), 3.74 – 3.58 (m, 3H), 2.32 (d,  $J = 11.0$  Hz, 1H), 2.28 – 2.19 (m, 2H), 2.13 (dt,  $J = 11.8, 4.0$  Hz, 1H), 2.10 – 2.03 (m, 1H), 1.93 (dddd,  $J = 23.2, 20.7, 11.7, 6.8$  Hz, 5H), 1.74 – 1.56 (m, 6H), 1.43 (s, 9H), 1.35 – 1.06 (m, 10H), 1.03 – 0.93 (m, 16H), 0.91 (d,  $J = 6.9$  Hz, 3H), 0.86 (t,  $J = 7.3$  Hz, 3H), 0.76 (t,  $J = 7.2$  Hz, 3H). **HRMS**  $m/z$  (ESI): calc. for  $[C_{47}H_{77}N_5NaO_8]^+$  ( $[M+Na]^+$ ) 862.5665, found 862.5692.

## 2b – Boc-([<sup>L</sup>Ala][(*S,S,R*)-EtACHA])<sub>2</sub>[<sup>L</sup>Ala]-OBn

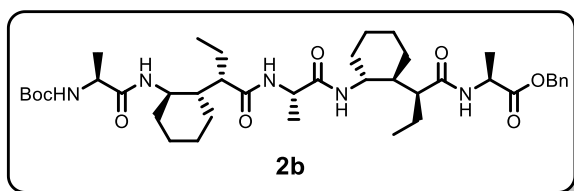

Tetrapeptide *ent*-**1c** (1 eq., 83 mg, 0.12 mmol) was benzyl-deprotected at the C-terminus according to **General Procedure 3**. The deprotected acid was coupled according to **General Procedure 1** with L-alanine benzyl ester 4-toluenesulfonate salt (2 eq., 85 mg, 0.24 mmol), EDCI-HCl (2 eq., 46 mg, 0.24 mmol), HOBt (2 eq., 44 mg, 0.24 mmol), and DIEA (4 eq., 84  $\mu$ L, 0.49 mmol) stirring at room temperature for 20 hr. Purification was carried out using automated silica column chromatography on a Biotage SNAP 10g cartridge eluting with a gradient of 50%  $\rightarrow$  60% EtOAc in hexanes over 10 column volumes to yield pentapeptide **2b** as 71 mg white solid (94  $\mu$ mol, 78% yield). **TLC**  $R_f = 0.20$  (5% MeOH in  $CH_2Cl_2$ , PMA stain). **<sup>1</sup>H NMR** (500 MHz,  $CDCl_3$ )  $\delta$  7.94 (d,  $J = 7.3$  Hz, 1H), 7.68 (d,  $J = 5.5$  Hz, 1H), 7.40 – 7.30 (m, 5H), 6.80 (d,  $J = 9.6$  Hz, 1H), 5.95 (d,  $J = 9.6$  Hz, 1H), 5.20 (d,  $J = 12.3$  Hz, 1H), 5.11 (d,  $J = 12.3$  Hz, 1H), 5.06 (d,  $J = 6.8$  Hz, 1H), 4.67 (p,  $J = 7.2$  Hz, 1H), 4.10 – 3.94 (m, 2H), 3.68 (qd,  $J = 10.9, 9.9, 3.1$  Hz, 1H), 3.61 (qd,  $J = 10.9, 4.1$  Hz, 1H), 2.19 (tt,  $J = 14.0, 3.4$  Hz, 2H), 2.04 – 1.98 (m, 1H), 1.97 – 1.83 (m, 2H), 1.75 – 1.43 (m, 15H), 1.41 (s, 9H), 1.36 – 0.98 (m, 13H), 0.84 (t,  $J = 7.3$  Hz, 3H), 0.75 (t,  $J = 7.2$  Hz, 3H). **HRMS**  $m/z$  (ESI): calc. for  $[C_{41}H_{66}N_5O_8]^+$  ( $[M+H]^+$ ) 756.4906, found 756.4905.

## L-3 – Boc-([<sup>L</sup>Phe][(*S,S,R*)-EtACHA])<sub>3</sub>-OBn

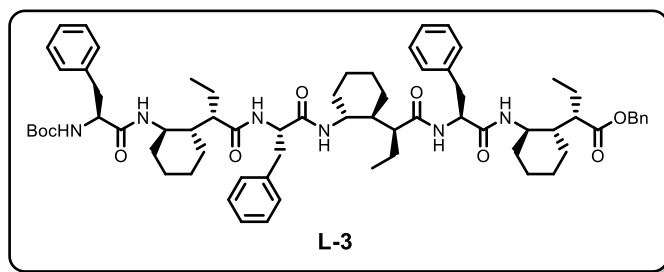

Boc-, benzyl ester-protected tetrapeptide **L-1a** (100 mg, 0.12 mmol) was Boc-deprotected at the N-terminus according to **General Procedure 2**. Separately, an amount of dipeptide **L-S3** (1.1 eq., 69 mg, 0.13 mmol) was benzyl-deprotected at the C-terminus according to **General Procedure 3**. The two components were coupled according to **General Procedure 1** with EDCI-HCl (1.1 eq., 26 mg, 0.13 mmol), HOAt (1.1 eq., 223  $\mu$ L from 0.6 M in DMF stock solution, 0.13 mmol), and DIEA (3 eq., 62  $\mu$ L, 0.36 mmol) stirring at room temperature for 16 hr. Purification was carried

out with silica column chromatography eluting with 5:3 hexanes/EtOAc to yield **L-3** as 77 mg white foam (0.067 mmol, 56% yield). **TLC**  $R_f$  = 0.56 (1:1 hexanes/EtOAc, PMA stain).  **$^1\text{H NMR}$**  (500 MHz,  $\text{CDCl}_3$ )  $\delta$  8.13 (d,  $J$  = 7.5 Hz, 1H), 7.73 (d,  $J$  = 5.5 Hz, 1H), 7.40 – 7.10 (m, 20H), 6.76 (d,  $J$  = 9.0 Hz, 1H), 6.29 (d,  $J$  = 9.7 Hz, 1H), 5.81 (d,  $J$  = 9.6 Hz, 1H), 5.14 (d,  $J$  = 7.2 Hz, 1H), 5.07 (d,  $J$  = 12.5 Hz, 1H), 5.03 (d,  $J$  = 12.5 Hz, 1H), 4.48 (q,  $J$  = 7.6 Hz, 1H), 4.37 (q,  $J$  = 7.6 Hz, 1H), 4.28 (dt,  $J$  = 9.7, 6.3 Hz, 1H), 3.64 (ddt,  $J$  = 14.4, 10.4, 5.3 Hz, 1H), 3.60 – 3.45 (m, 2H), 3.17 – 2.86 (m, 6H), 2.46 (dt,  $J$  = 10.2, 3.8 Hz, 1H), 2.18 (d,  $J$  = 10.1 Hz, 1H), 2.12 (d,  $J$  = 11.6 Hz, 1H), 1.99 (d,  $J$  = 12.7 Hz, 1H), 1.79 – 1.43 (m, 19H), 1.39 (s, 9H), 1.29 – 0.81 (m, 13H), 0.79 (t,  $J$  = 7.2 Hz, 3H), 0.71 (t,  $J$  = 7.2 Hz, 3H), 0.69 (t,  $J$  = 7.2 Hz, 3H). **HRMS**  $m/z$  (ESI): calc. for  $[\text{C}_{69}\text{H}_{95}\text{N}_6\text{O}_9]^+$  ( $[\text{M}+\text{H}]^+$ ) 1151.7156, found 1151.7157.

### S9 – Boc-[<sup>L</sup>Val]-OBrBn

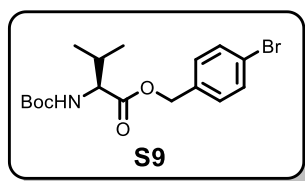

Boc-L-valine (652 mg, 3.00 mmol) was dissolved to 0.1 M in DMF. To this solution was added  $\text{Cs}_2\text{CO}_3$  (1 eq., 977 mg, 3.00 mmol) and 4-bromobenzyl bromide (0.95 eq., 712 mg, 2.85 mmol). The reaction mixture was stirred for 12 hr at room temperature, after which it was washed with 0.5 M aqueous HCl, 5% aqueous LiCl, saturated aqueous  $\text{NaHCO}_3$ , and brine successively. The organic layer was dried over  $\text{Na}_2\text{SO}_4$ , filtered, and concentrated *in vacuo* to yield crude **S9** as 1.12 g clear viscous oil. This residue was filtered through a silica plug eluting with 4:1 hexanes/EtOAc to yield 1.04 g **S9** as a clear viscous oil (0.269 mmol, 90% yield). **TLC**  $R_f$  = 0.44 (4:1 hexanes/EtOAc,  $\text{I}_2$  stain).  **$^1\text{H NMR}$**  (300 MHz,  $\text{CDCl}_3$ )  $\delta$  7.49 (d,  $J$  = 8.4 Hz, 2H), 7.23 (d,  $J$  = 8.3 Hz, 2H), 5.15 (d,  $J$  = 12.5 Hz, 1H), 5.07 (d,  $J$  = 12.5 Hz, 1H), 5.00 (d,  $J$  = 9.3 Hz, 1H), 4.26 (dd,  $J$  = 9.2, 4.7 Hz, 1H), 2.21 – 2.07 (m, 1H), 1.44 (s, 9H), 0.94 (d,  $J$  = 6.8 Hz, 3H), 0.85 (d,  $J$  = 6.9 Hz, 3H). **HRMS**  $m/z$  (ESI): calc. for  $[\text{C}_{17}\text{H}_{24}\text{BrNO}_4]^+$  ( $[\text{M}+\text{H}]^+$ ) 386.0962, found 386.0949.

### S10 – Boc-(<sup>L</sup>Val)[(S,S,R)-EtACHA]<sub>2</sub>[<sup>L</sup>Val]-OBrBn

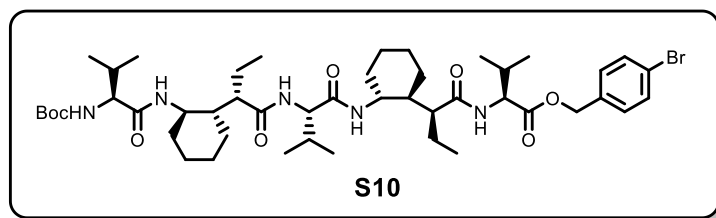

Boc-L-valine *para*-bromobenzyl ester **X75** (3 eq., 156 mg, 0.405 mmol) was Boc-deprotected at the N-terminus according to **General Procedure 2**. Separately, **X56** (100 mg, 0.135 mmol) was benzyl-deprotected at the C-terminus according to **General Procedure 3**. The two components were coupled according to **General Procedure 1** with EDCI-HCl (2 eq., 52 mg, 0.27 mmol), HOAt (2 eq., 450  $\mu\text{L}$  from 0.6 M in DMF stock solution, 0.27 mmol), and DIEA (6 eq., 141  $\mu\text{L}$ ,

0.810 mmol) stirring at room temperature for 16 hr. Purification was carried out with silica column chromatography eluting with 2:1 hexanes/EtOAc to yield 75.9 mg white foam (0.826 mmol, 61% yield). **TLC**  $R_f$  = 0.48 (1:1 hexanes/EtOAc, PMA stain).  **$^1\text{H NMR}$**  (300 MHz,  $\text{CDCl}_3$ )  $\delta$  7.94 (d,  $J$  = 8.5 Hz, 1H), 7.70 (d,  $J$  = 6.2 Hz, 1H), 7.50 (s, 1H), 7.25 (d,  $J$  = 8.6 Hz, 1H), 6.90 (d,  $J$  = 9.2 Hz, 1H), 6.02 (d,  $J$  = 9.7 Hz, 1H), 5.19 (d,  $J$  = 12.5 Hz, 1H), 5.14 (d,  $J$  = 7.2 Hz, 1H), 5.05 (d,  $J$  = 12.5 Hz, 1H), 4.57 (dd,  $J$  = 8.3, 5.6 Hz, 1H), 3.85 (t,  $J$  = 8.1 Hz, 1H), 3.75 – 3.61 (m, 3H), 2.53 – 2.09 (m, 4H), 2.04 – 1.53 (m, 10H), 1.42 (s, 9H), 1.37 – 0.80 (m, 36H), 0.76 (t,  $J$  = 7.2 Hz, 3H). **HRMS**  $m/z$  (ESI): calc. for  $[\text{C}_{47}\text{H}_{77}\text{BrN}_5\text{O}_8]^+$  ( $[\text{M}+\text{H}]^+$ ) 918.4951, found 918.4947.

#### 4 – Boc-([<sup>L</sup>Val][(*S,S,R*)-EtACHA])<sub>4</sub>[<sup>L</sup>Val]-OBrBn

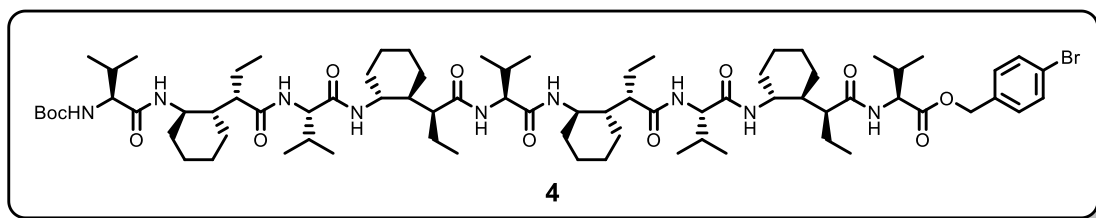

Boc-, benzyl ester-protected pentapeptide **S10** (33 mg, 0.035 mmol) was Boc-deprotected at the N-terminus according to **General Procedure 2**. Separately, an amount of tetrapeptide **S7** (1.1 eq., 29 mg, 0.039 mmol) was benzyl-deprotected at the C-terminus according to **General Procedure 3**. The two components were coupled according to **General Procedure 1** with EDCI-HCl (1.1 eq., 7.5 mg, 0.039 mmol), HOAt (1.1 eq., 65  $\mu\text{L}$  from 0.6 M in DMF stock solution, 0.039 mmol), and DIEA (3 eq., 19  $\mu\text{L}$ , 0.11 mmol) stirring at room temperature for 40 hr. Purification was carried out with silica column chromatography eluting with 5:4 hexanes/EtOAc to yield 20 mg white foam (0.014 mmol, 39% yield). **TLC**  $R_f$  = 0.37 (1:1 hexanes/EtOAc, PMA stain).  **$^1\text{H NMR}$**  (500 MHz,  $\text{CDCl}_3$ )  $\delta$  8.54 – 8.45 (m, 1H), 7.88 (d,  $J$  = 8.4 Hz, 1H), 7.75 (s, 1H), 7.49 (d,  $J$  = 8.3 Hz, 1H), 7.25 (d,  $J$  = 10.4 Hz, 1H), 6.98 (d,  $J$  = 9.2 Hz, 1H), 6.78 (d,  $J$  = 9.2 Hz, 1H), 6.67 (d,  $J$  = 9.3 Hz, 1H), 5.81 (d,  $J$  = 9.5 Hz, 1H), 5.19 (d,  $J$  = 12.5 Hz, 1H), 5.04 (d,  $J$  = 12.5 Hz, 1H), 4.96 (d,  $J$  = 7.9 Hz, 1H), 4.58 (dd,  $J$  = 8.4, 5.4 Hz, 1H), 3.96 (dd,  $J$  = 9.1, 6.1 Hz, 1H), 3.92 – 3.80 (m, 2H), 3.71 – 3.59 (m, 4H), 2.41 – 2.34 (m, 1H), 2.31 – 2.16 (m, 2H), 2.13 (dt,  $J$  = 12.0, 4.1 Hz, 1H), 2.09 – 1.80 (m, 12H), 1.75 – 1.48 (m, 19H), 1.43 (s, 9H), 1.36 – 0.90 (m, 52H), 0.87 – 0.74 (m, 12H). **MS**  $m/z$  (MALDI): calc. for  $[\text{C}_{77}\text{H}_{128}\text{BrN}_8\text{NaO}_{11}]^+$  ( $[\text{M}+\text{Na}]^+$ ) 1474.2, found 1474.2. Observed isotope pattern matches calculated distribution.

#### 5 – Boc-([<sup>L</sup>Phe][(*S,S,R*)-EtACHA])<sub>4</sub>-OBn

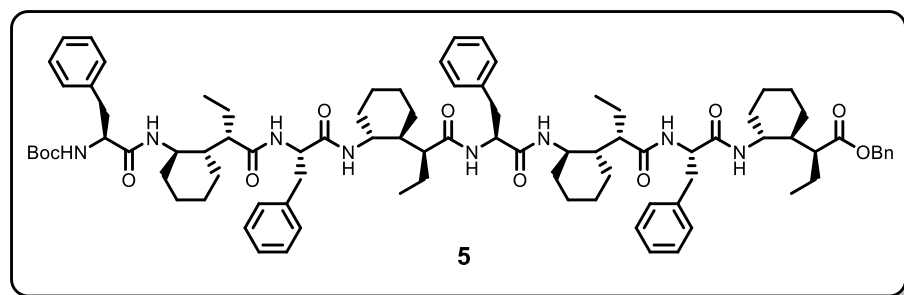

Boc-, benzyl ester-protected tetrapeptide **L-1a** (53 mg, 64  $\mu\text{mol}$ ) was Boc-deprotected at the N-terminus according to **General Procedure 2**. Separately, another amount of tetrapeptide **L-1a** (1 eq., 53 mg, 64  $\mu\text{mol}$ ) was benzyl-deprotected at the C-terminus according to **General Procedure 3**. The two components were coupled according to **General Procedure 1** with EDCI-HCl (1 eq., 12 mg, 64  $\mu\text{mol}$ ), Oxyma Pure (1 eq., 9 mg, 64  $\mu\text{mol}$ ), and DIEA (2 eq., 22  $\mu\text{L}$ , 128  $\mu\text{mol}$ ) stirring at room temperature for 36 hr. Purification was carried out with silica column chromatography eluting with 3% MeOH in  $\text{CH}_2\text{Cl}_2$  to yield octapeptide **5** as 47 mg white foam (32  $\mu\text{mol}$ , 50% yield). **TLC**  $R_f$  = 0.24 (5% MeOH in  $\text{CH}_2\text{Cl}_2$ , PMA stain).  **$^1\text{H NMR}$**  (400 MHz,  $\text{CDCl}_3$ )  $\delta$  8.55 (d,  $J$  = 5.4 Hz, 1H), 8.22 (d,  $J$  = 7.6 Hz, 1H), 7.79 (d,  $J$  = 5.4 Hz, 1H), 7.40 – 7.10 (m, 25H), 6.66 (s, 1H), 6.38 (s, 1H), 6.14 (d,  $J$  = 9.6 Hz, 1H), 5.95 (d,  $J$  = 9.5 Hz, 1H), 5.17 – 4.94 (m, 4H), 4.51 (p,  $J$  = 7.2, 6.8 Hz, 3H), 4.20 (q,  $J$  = 7.4 Hz, 1H), 3.79 – 3.44 (m, 3H), 3.19 (dd,  $J$  = 14.5, 6.9 Hz, 1H), 3.13 – 2.82 (m, 7H), 2.52 – 2.40 (m, 2H), 1.82 – 1.45 (m, 20H), 1.39 (s, 9H), 1.31 – 0.72 (m, 29H), 0.73 – 0.61 (m, 9H). **HRMS**  $m/z$  (ESI): calc. for  $[\text{C}_{89}\text{H}_{126}\text{N}_8\text{O}_{11}]^{2+}$  ( $[\text{M}+2\text{H}]^{2+}$ ) 733.4611, found 733.4630.

### 6 – $(\text{CH}_3\text{CH}_2)_2\text{CHCO}-[\text{Phe}][(\text{R,R,S})\text{-EtACHA}]\text{-OBn}$

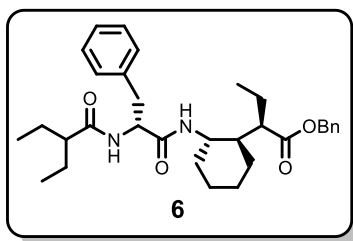

Boc-, benzyl ester-protected dipeptide **D-S3** (40 mg, 77  $\mu\text{mol}$ ) was Boc-deprotected at the N-terminus according to **General Procedure 2**. Boc-deprotected **D-S3** was coupled to 2-ethylbutyric acid (1.5 eq., 12  $\mu\text{L}$ , 92  $\mu\text{mol}$ ) according to **General Procedure 1** with EDCI-HCl (1.5 eq., 17 mg, 92  $\mu\text{mol}$ ), HOBT (1.5 eq., 21 mg, 92  $\mu\text{mol}$ ), and DIEA (3 eq., 32  $\mu\text{L}$ , 0.18 mmol), stirring for 5 hr. Crude product was purified by automated silica column chromatography on a Biotage ZIP 10g cartridge using a gradient of 8%  $\rightarrow$  64% EtOAc in hexanes over 10 column volumes to yield **6** as 33 mg white foam (63  $\mu\text{mol}$ , 82% yield). **TLC**  $R_f$  = 0.38 (2:1 hexanes:EtOAc, PMA stain).  **$^1\text{H NMR}$**  (500 MHz,  $\text{CDCl}_3$ )  $\delta$  7.38 – 7.18 (m, 10H), 6.21 (d,  $J$  = 7.7 Hz, 1H), 5.38 (d,  $J$  = 9.6 Hz, 1H), 5.08 (s, 2H), 4.59 (td,  $J$  = 8.3, 6.3 Hz, 1H), 3.66 (qd,  $J$  = 10.7, 3.7 Hz, 1H), 3.11 (dd,  $J$  = 13.5, 6.2 Hz, 1H), 2.94 (dd,  $J$  = 13.5, 8.7 Hz, 1H), 2.32 (dt,  $J$  = 11.1, 3.2 Hz, 1H), 1.86 (tt,  $J$  = 9.3, 5.2 Hz, 1H), 1.69 – 1.33 (m, 12H), 1.27 – 0.94 (m, 3H), 0.79 (q,  $J$  = 7.5 Hz, 9H). **HRMS**  $m/z$  (ESI): calc. for  $[\text{C}_{32}\text{H}_{45}\text{N}_2\text{O}_4]^+$  ( $[\text{M}+\text{H}]^+$ ) 521.3374, found 521.3372.

### S11 – Boc-([ $^{\text{L}}$ Val][(\text{S,S,R})\text{-EtACHA}])<sub>3</sub>-OBn

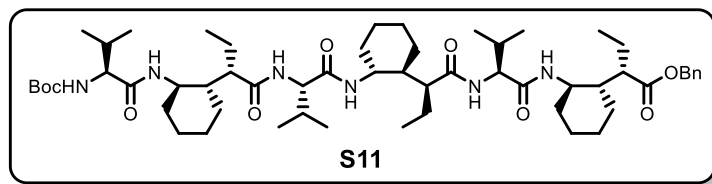

Boc-, benzyl ester-protected tetrapeptide **S7** (90 mg, 0.12 mmol) was Boc-deprotected at the N-terminus according to **General Procedure 2**. Separately, an amount of dipeptide **S6** (1.1 eq., 63 mg, 0.13 mmol) was benzyl-deprotected at the C-terminus according to **General Procedure 3**. The two components were coupled according to **General Procedure 1** with EDCI-HCl (1.1 eq., 26 mg, 0.13 mmol), HOAt (1.1 eq., 223  $\mu$ L from 0.6 M in DMF stock solution, 0.13 mmol), and DIEA (2 eq., 43  $\mu$ L, 0.24 mmol) stirring at room temperature for 40 hr. Purification was carried out with silica column chromatography eluting with 3:2 hexanes/EtOAc to yield hexapeptide **S11** as 54 mg white foam (0.054 mmol, 44% yield). **TLC**  $R_f$  = 0.37 (1:1 hexanes/EtOAc, PMA stain).  **$^1\text{H NMR}$**  (400 MHz,  $\text{CDCl}_3$ )  $\delta$  8.01 (d,  $J$  = 6.1 Hz, 1H), 7.82 (d,  $J$  = 8.5 Hz, 1H), 7.33 (q,  $J$  = 7.1, 6.1 Hz, 5H), 6.85 (d,  $J$  = 9.0 Hz, 1H), 6.69 (d,  $J$  = 9.7 Hz, 1H), 6.07 (d,  $J$  = 9.0 Hz, 1H), 5.17 (d,  $J$  = 12.5 Hz, 1H), 5.13 (d,  $J$  = 12.3 Hz, 1H), 4.93 (d,  $J$  = 7.9 Hz, 1H), 4.32 (dd,  $J$  = 8.6, 5.9 Hz, 1H), 3.99 (t,  $J$  = 7.9 Hz, 1H), 3.84 – 3.56 (m, 4H), 2.54 (d,  $J$  = 10.9 Hz, 1H), 2.47 – 2.40 (m, 1H), 2.39 – 2.29 (m, 1H), 2.13 – 1.45 (m, 22H), 1.42 (s, 9H), 1.38 – 0.92 (m, 32H), 0.89 (t,  $J$  = 7.3 Hz, 3H), 0.82 (t,  $J$  = 7.1 Hz, 3H), 0.72 (t,  $J$  = 7.2 Hz, 3H). **HRMS**  $m/z$  (ESI): calc. for  $[\text{C}_{57}\text{H}_{94}\text{N}_6\text{NaO}_9]^+$  ( $[\text{M}+\text{Na}]^+$ ) 1029.6975, found 1029.6953.

### **S12** – Boc-([<sup>L</sup>Val][(*S,S,R*)-EtACHA])<sub>4</sub>-OBn

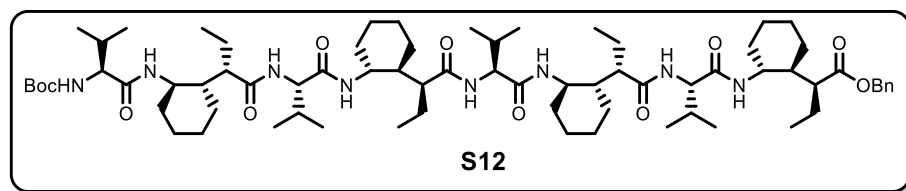

Boc-, benzyl ester-protected tetrapeptide **S7** (93 mg, 0.13 mmol) was Boc-deprotected at the N-terminus according to **General Procedure 2**. Separately, another amount of tetrapeptide **S7** (1.2 eq., 111 mg, 0.15 mmol) was benzyl-deprotected at the C-terminus according to **General Procedure 3**. The two components were coupled according to **General Procedure 1** with HATU (1.2 eq., 57 mg, 0.15 mmol), HOAt (1.2 eq., 250  $\mu$ L from 0.6 M in DMF stock solution, 0.15 mmol), and DIEA (2 eq., 44  $\mu$ L, 0.25 mmol) stirring at room temperature for 48 hr. Purification was carried out with silica column chromatography eluting with 4:3 hexanes/EtOAc to yield octapeptide **S12** as 72 mg white foam (0.048 mmol, 45% yield). **TLC**  $R_f$  = 0.39 (1:1 hexanes/EtOAc, PMA stain).  **$^1\text{H NMR}$**  (400 MHz,  $\text{CDCl}_3$ )  $\delta$  8.64 (d,  $J$  = 5.6 Hz, 1H), 7.81 (d,  $J$  = 8.6 Hz, 1H), 7.73 (d,  $J$  = 6.1 Hz, 1H), 7.41 – 7.29 (m, 5H), 7.07 (d,  $J$  = 9.3 Hz, 1H), 6.81 (d,  $J$  = 9.1 Hz, 1H), 6.71 (d,  $J$  = 9.7 Hz, 1H), 6.10 (d,  $J$  = 9.1 Hz, 1H), 5.16 (d,  $J$  = 12.6 Hz, 1H), 5.13 (d,  $J$  = 12.6 Hz, 1H), 4.97 (d,  $J$  = 8.0 Hz, 1H), 4.32 (dd,  $J$  = 8.5, 5.8 Hz, 1H), 4.05 (dd,  $J$  = 9.1, 6.1 Hz, 1H), 3.85 (t,  $J$  = 7.9 Hz, 1H), 3.81 – 3.52 (m, 4H), 3.44 – 3.33 (m, 1H), 2.55 (dt,  $J$  = 10.9, 3.5 Hz, 1H), 2.48 (d,  $J$  = 7.9 Hz, 1H), 2.40 – 2.26 (m, 2H), 2.24 – 2.09 (m, 3H), 2.09 – 1.56 (m, 24H), 1.43 (s, 9H), 1.38 – 0.72 (m, 57H). **HRMS**  $m/z$  (ESI): calc. for  $[\text{C}_{72}\text{H}_{121}\text{N}_8\text{O}_{11}]^+$  ( $[\text{M}+\text{H}]^+$ ) 1273.9150, found 1273.9127.

### S13 – Boc-[<sup>D</sup>Phe]-NH<sup>i</sup>Pr

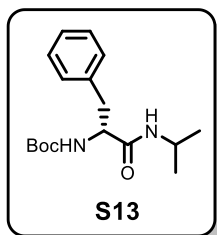

Boc-D-phenylalanine (1 eq., 571 mg, 2.00 mmol) was coupled to isopropylamine (1.5 eq., 379  $\mu$ L, 3.00 mmol) according to **General Procedure 1** with EDCI-HCl (1.5 eq., 575 mg, 3.00 mmol), HOBT (1.5 eq., 541 mg, 3.00 mmol), and DIEA (3 eq., 1.05 mL, 6.00 mmol) and stirred for 2.5 hr. Crude product was purified with silica column chromatography eluting with 2:1 hexanes:EtOAc to yield **S13** as 323 mg white solid (0.62 mmol, 31%). **TLC**  $R_f$  = 0.50 (1:1 hexanes:EtOAc, ninhydrin stain) **<sup>1</sup>H NMR** (500 MHz, CDCl<sub>3</sub>)  $\delta$  7.29 – 7.14 (m, 5H), 6.49 (d,  $J$  = 8.0 Hz, 1H), 5.68 (d,  $J$  = 8.5 Hz, 1H), 4.41 (q,  $J$  = 7.7 Hz, 1H), 4.02 – 3.88 (m, 1H), 3.00 (d,  $J$  = 7.4 Hz, 2H), 1.39 (s, 9H), 1.04 (d,  $J$  = 6.7 Hz, 3H), 0.96 (d,  $J$  = 6.6 Hz, 3H). **HRMS**  $m/z$  (ESI): calc. for [C<sub>17</sub>H<sub>27</sub>N<sub>2</sub>O<sub>3</sub>]<sup>+</sup> ([M+H]<sup>+</sup>) 307.2017, found 307.2017.

### S14 – (CH<sub>3</sub>CH<sub>2</sub>)<sub>2</sub>CHCO-[<sup>D</sup>Phe]-NH<sup>i</sup>Pr

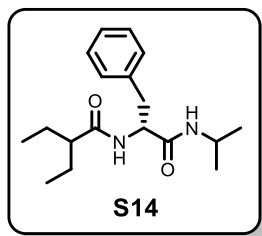

Boc-protected **X1** (1 eq., 59 mg, 0.19 mmol) was Boc-deprotected according to **General Procedure 2**. The product of this reaction were coupled with 2-ethylbutyric acid (1.2 eq., 29  $\mu$ L, 0.23 mmol) according to **General Procedure 1** with EDCI-HCl (1.2 eq., 44 mg, 0.23 mmol), DMAP (0.2 eq., 5 mg, 40  $\mu$ mol), and DIEA (2.4 eq., 80  $\mu$ L, 0.461 mmol) and stirred for 16 hr. Product **S14** was isolated as 36 mg white solid (0.12 mmol, 61% yield) after extractive workup, which was highly pure and did not require silica column chromatography. **TLC**  $R_f$  = 0.40 (1:1 hexanes/EtOAc, PMA stain). **<sup>1</sup>H NMR** (500 MHz, CDCl<sub>3</sub>)  $\delta$  7.23 – 7.11 (m, 5H), 6.22 (d,  $J$  = 7.9 Hz, 1H), 5.73 (d,  $J$  = 7.9 Hz, 1H), 4.57 (q,  $J$  = 7.6 Hz, 1H), 3.88 (h,  $J$  = 6.7 Hz, 1H), 3.03 (dd,  $J$  = 13.7, 7.0 Hz, 1H), 2.93 (dd,  $J$  = 13.7, 7.9 Hz, 1H), 1.81 (tt,  $J$  = 9.4, 5.1 Hz, 1H), 1.48 (tp,  $J$  = 15.5, 7.7 Hz, 2H), 1.42 – 1.28 (m, 2H), 0.97 (d,  $J$  = 6.6 Hz, 3H), 0.91 (d,  $J$  = 6.5 Hz, 3H), 0.76 (t,  $J$  = 7.4 Hz, 3H), 0.68 (t,  $J$  = 7.4 Hz, 3H). **HRMS**  $m/z$  (ESI): calc. for [C<sub>18</sub>H<sub>29</sub>N<sub>2</sub>O<sub>2</sub>]<sup>+</sup> ([M+H]<sup>+</sup>) 305.2224, found 305.2220.

## S15 – Boc-[(*R,R,S*)-EtACHA][<sup>D</sup>Phe]-NH<sup>i</sup>Pr

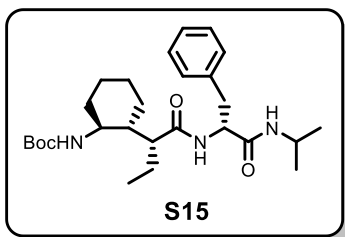

**D-S2** (1 eq., 46 mg, 0.12 mmol) was benzyl-deprotected at the C-terminus according to **General Procedure 3**. Boc-protected **X1** (1.2 eq., 45 mg, 0.15 mmol) was Boc-deprotected at the N-terminus according to **General Procedure 2**. The two components were coupled according to **General Procedure 1** with EDCI-HCl (1.2 eq., 28 mg, 0.15 mmol), Oxyma Pure (1.2 eq., 20 mg, 0.15 mmol), and DIEA (2.4 eq., 52  $\mu$ L, 0.29 mmol) stirring at room temperature for 20 hr. Crude product was purified with silica column chromatography eluting with 3:2 hexanes:EtOAc to yield **S15** as 48 mg white solid (0.10 mmol, 82% yield). TLC  $R_f$  = 0.15 (1:2 hexanes/EtOAc, PMA stain). <sup>1</sup>H NMR (500 MHz, CDCl<sub>3</sub>)  $\delta$  7.35 – 7.19 (m, 5H), 6.38 (d,  $J$  = 7.6 Hz, 1H), 5.69 (d,  $J$  = 7.9 Hz, 1H), 4.58 (q,  $J$  = 7.6 Hz, 1H), 4.50 (d,  $J$  = 9.7 Hz, 1H), 3.97 (h,  $J$  = 6.7 Hz, 1H), 3.35 (qd,  $J$  = 10.8, 3.8 Hz, 1H), 3.14 (dd,  $J$  = 13.7, 7.0 Hz, 1H), 3.00 (dd,  $J$  = 13.7, 8.1 Hz, 1H), 2.32 – 2.24 (m, 1H), 2.00 – 1.91 (m, 1H), 1.73 – 1.52 (m, 6H), 1.45 (s, 9H), 1.31 – 1.07 (m, 4H), 1.05 (d,  $J$  = 6.7 Hz, 3H), 0.98 (d,  $J$  = 6.6 Hz, 3H), 0.79 (t,  $J$  = 7.2 Hz, 3H). Small peaks (integration  $\approx$  0.11) were identified as rotamers with gradient 1D-NOESY with 2 s mixing time.<sup>S2</sup> HRMS  $m/z$  (ESI): calc. for [C<sub>27</sub>H<sub>44</sub>N<sub>3</sub>O<sub>4</sub>]<sup>+</sup> ([M+H]<sup>+</sup>) 474.3330, found 474.3327.

### III. Tetramer Crystal Structures

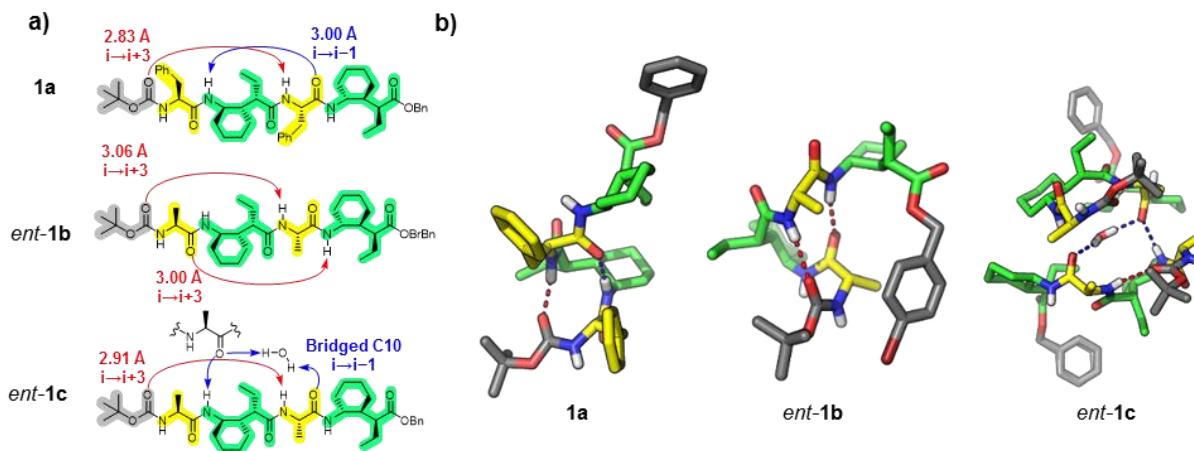

## IV. 2D-NMR

### a. 2D-NMR Experimental

Peptides **2a**, **4**, **5**, **S12**, and **S11** were prepared for 2D-NMR analysis by dissolving to 4-10 mM in 500-600  $\mu\text{L}$   $\text{CDCl}_3$  (0.03% TMS) dried over  $3\text{\AA}$  molecular sieves and transferred to 5 mm Norell Sample Vault NMR tubes (SVCP-5-178). Prior to 2D-NMR data collection, good peptide solubility was confirmed by measuring the  $^1\text{H}$ -NMR at concentrations of 100  $\mu\text{M}$  to 10 mM;  $\Delta\delta$  of amide NH  $< 0.02$  ppm was interpreted as lack of aggregation.

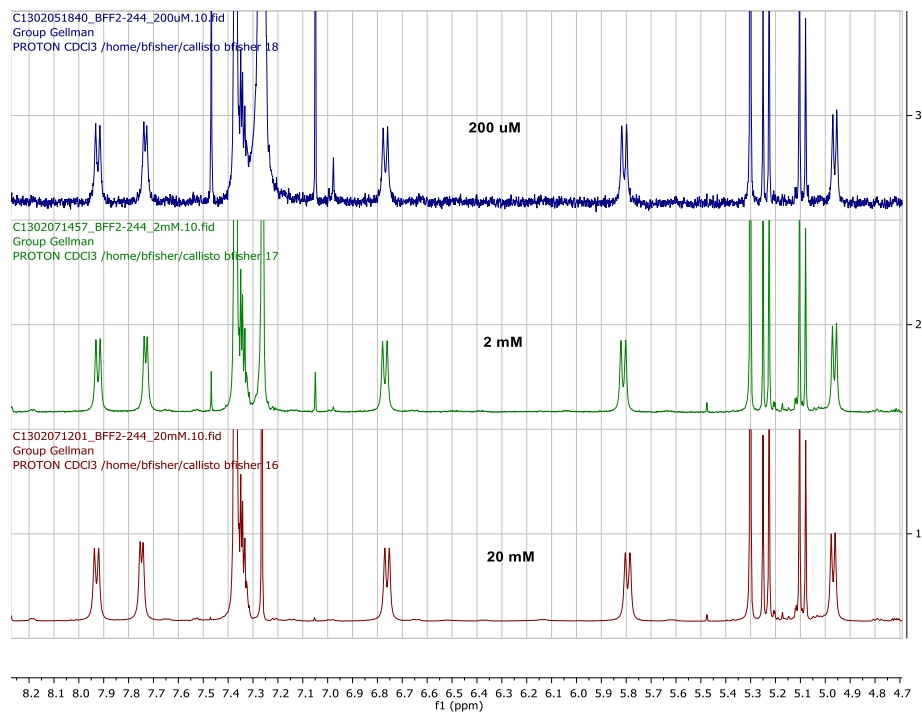

**Figure S2.** Dilution studies of **2a**. Change in chemical shift  $\Delta\delta < 0.02$  for all amide/carbamate NH from 200  $\mu\text{M}$  to 20 mM, interpreted as lack of significant aggregation under 2D NMR experimental conditions.



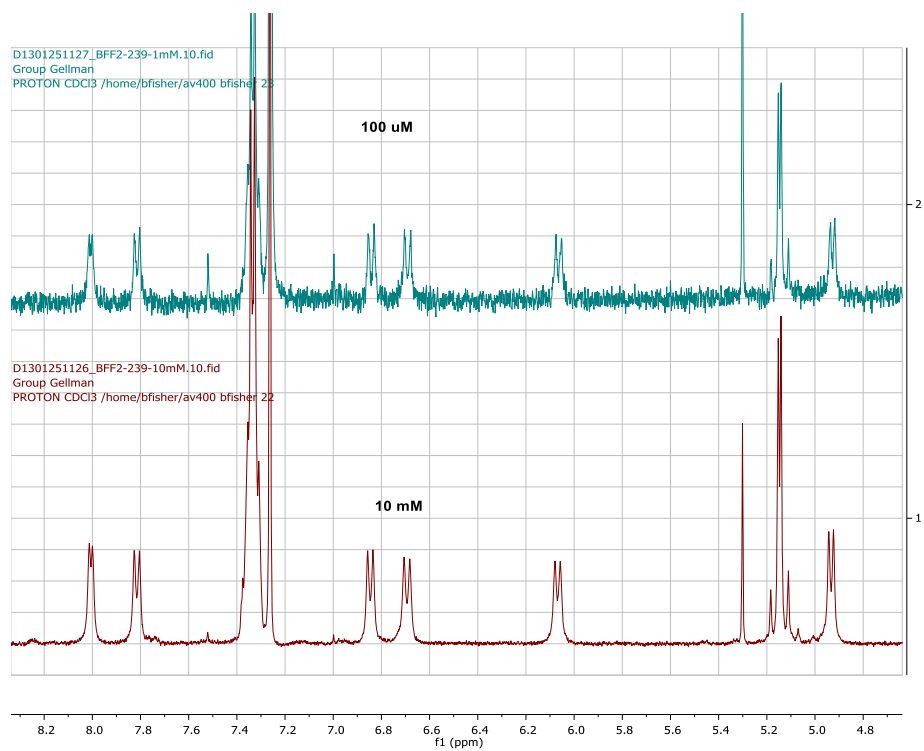

**Figure S3.** Dilution studies of **S11**. Change in chemical shift  $\Delta\delta < 0.02$  for all amide/carbamate NH from 100  $\mu$ M to 10 mM, interpreted as lack of significant aggregation under 2D NMR experimental conditions

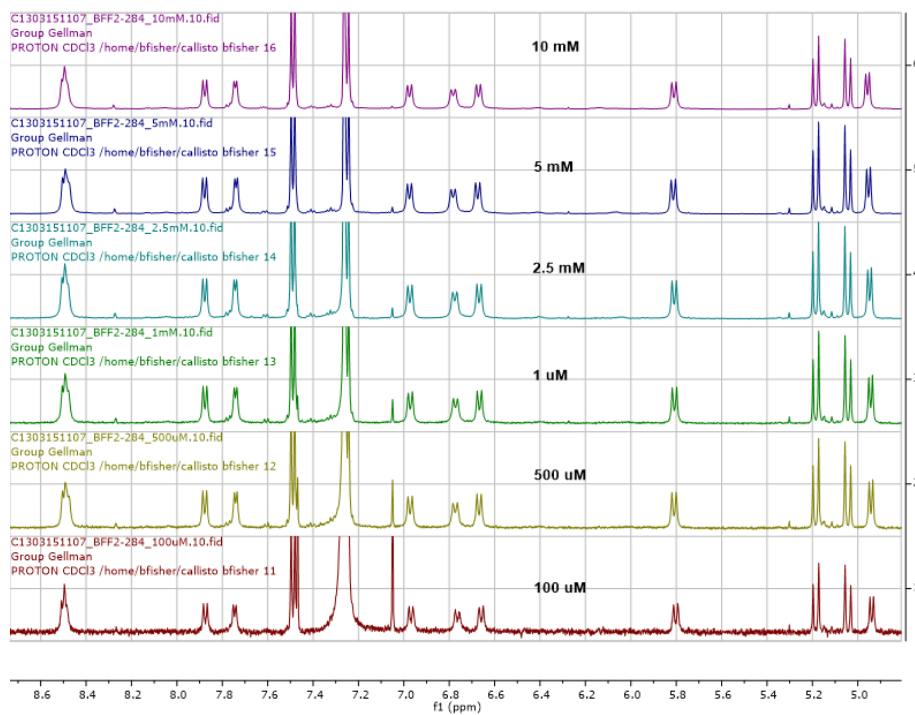

**Figure S4.** Dilution studies of **4**. Change in chemical shift  $\Delta\delta < 0.02$  for all amide/carbamate NH from 100  $\mu$ M to 10 mM, interpreted as lack of significant aggregation under 2D NMR experimental conditions.

2D-NMR data of compounds **2a**, **4**, **5**, and **S11** were collected at 24°C on a Bruker 500 MHz Avance III-500 spectrometer equipped with a DCH cryoprobe and running in Icon mode. Most parameters were unchanged from their default values; parameters altered are shown in **Table S1**.<sup>S3</sup> Sweep width was manually optimized from the <sup>1</sup>H-NMR data.

**Table S1.** Selected parameters in 2D-NMR experiments of **2a**, **S11**, **4**, and **5**.

| Name                             | <b>2a</b>      | <b>S11</b>     | <b>4</b>       | <b>5</b>       |
|----------------------------------|----------------|----------------|----------------|----------------|
| <b>Instrument</b>                | Bruker 500 MHz | Bruker 500 MHz | Bruker 500 MHz | Bruker 500 MHz |
| <b>Concentration</b>             | 10 mM          | 10 mM          | 10 mM          | 10 mM          |
| <b>COSY parameter set</b>        | COSYGPSW       | COSYGPSW       | COSYGPSW       | COSYGPSW       |
| <b>COSY pulseprog</b>            | cosygpppqf     | cosygpppqf     | cosygpppqf     | cosygpppqf     |
| <b>ns</b>                        | 4              | 2              | 4              | 4              |
| <b>ds</b>                        | 8              | 8              | 8              | 8              |
| <b>td(f2)</b>                    | 2048           | 2048           | 2048           | 2048           |
| <b>td(f1)</b>                    | 256            | 256            | 256            | 256            |
| <b>TOCSY parameter set</b>       | MLEVPHSW       | MLEVPHSW       | MLEVPHSW       | MLEVPHSW       |
| <b>TOCSY pulseprog</b>           | mlevphpp       | mlevphpp       | mlevphpp       | mlevphpp       |
| <b>ns</b>                        | 8              | 8              | 8              | 4              |
| <b>ds</b>                        | 16             | 16             | 16             | 16             |
| <b>td(f2)</b>                    | 2048           | 2048           | 2048           | 2048           |
| <b>td(f1)</b>                    | 256            | 256            | 256            | 256            |
| <b>D9</b>                        | 80 ms          | 80 ms          | 80 ms          | 80 ms          |
| <b>NOESY/ROESY parameter set</b> | NOESYPHSW      | NOESYPHSW      | ROESYPHSW      | ROESYPHSW      |
| <b>NOESY/ROESY pulseprog</b>     | noesygpqhpp    | noesygpqhpp    | roesyphpp.2    | roesyphpp.2    |
| <b>ns</b>                        | 16             | 16             | 16             | 16             |
| <b>ds</b>                        | 32             | 32             | 32             | 32             |
| <b>td(f2)</b>                    | 2048           | 2048           | 2048           | 2048           |
| <b>td(f1)</b>                    | 256            | 256            | 256            | 256            |
| <b>p15</b>                       | –              | –              | 200 ms         | 200 ms         |
| <b>d8</b>                        | 300 ms         | 300 ms         | –              | –              |

2D-NMR data of **2a**, **S11**, **4**, and **5** were processed with Bruker TopSpin 3.1 initially using default processing parameters defined in the parameter sets. COSY data were baseline fit with default settings. TOCSY and ROESY data were phased in both dimensions automatically and adjusted manually, then baseline fit in both dimensions with default settings. The computer program SPARKY<sup>S4</sup> was used for resonance assignment and analysis of the processed data. ROESY crosspeak volume integration was carried out using default parameters and inspected for accuracy.

2D-NMR data (gCOSY, TOCSY, ROESY) of 4 mM compound **S12** in dry CDCl<sub>3</sub> was collected on a Varian INOVA-600 MHz spectrometer equipped with a 5 mm probe at 10°C. Standard Varian pulse sequences were used and the data were processed using Varian VNMR 6.1 software. Shifted sine bell window functions were generally applied before Fourier transformation. The gCOSY spectrum was obtained in absolute mode with gradient echo coherence selection; TOCSY and ROESY spectra were acquired in the sensitive mode with hypercomplex phase cycling (States-Haberkmorn method). All experiments were performed by collecting 2048 points in f2 and 300-600 points in f1. The TOCSY experiment employed a standard MLEV-17 spin lock sequence with a

spin lock field of 7-8 KHz and mixing time of 80 ms. The ROESY experiment used spin-locking fields of ~3 kHz and mixing time of 250 ms. The computer program SPARKY<sup>S4</sup> was used for resonance assignment and analysis of the processed data. ROESY crosspeak volume integration was carried out using default parameters and inspected for accuracy.

## b. 2D-NMR Resonance/ROESY Distance Assignment Procedures

### Sequential Assignment Procedure

Resonance assignment of peptide foldamers was accomplished by employing sequential resonance assignment from the N-terminus to the C-terminus.<sup>S5</sup> The N-terminal Boc carbamate NH ( $\delta \approx 5.0$  ppm) is invariably upfield of all amide NHs of a peptide ( $\delta > 5.5$  ppm) and has a characteristic H-N broadness distinguishing it from H-C resonances that may be nearby. Thus, assignment of the Boc carbamate NH is nearly unambiguous, and assignment of the rest of the peptide's resonances can rely on relaying information from this proton through to the C-terminus of the peptide sequence. The carbamate NH allows for simple assignment of the rest of the protons in the spin system,  $H_\alpha$  and sidechain protons of the first  $\alpha$ -residue, using the COSY and TOCSY data. A very intense ROESY crosspeak is found between  $H_\alpha(\alpha,i)$  and  $HN(\gamma,i+1)$ . Taking the expected chemical shift range of  $H_\gamma$  into consideration ( $\delta \approx 3.4-3.6$ ), a single likely resonance assignment emerges for  $HN(\gamma,i+1)$ , extending assignment past the peptide bond. Assignment of the protons attached to functionalized carbons (the unfunctionalized cyclohexyl protons are too overlapped for unambiguous assignment) in the rest of the  $\gamma$ -residue spin system is readily achieved with the COSY and TOCSY data. A very intense ROESY crosspeak can be found between  $H_\alpha(\gamma,i+1)$  and  $HN(\alpha,i+2)$ , allowing for its unambiguous assignment and leaping across another peptide bond. These steps are followed until full resonance assignment is achieved. Confirmation of the assignments can be achieved using HMBC to relate the unique ester carbonyl at the C-terminus to the  $H_\alpha$  of the last residue.

### NOE Distance Calculation

Integrated ROESY crosspeak volumes were converted into distances  $r_{ij}$  (assuming the initial rate approximation) by  $r^{-6}$  averaging.<sup>S6</sup> Comparison was made with an integrated known reference distance  $r_{ref}$  using **Equation 1**:

$$r_{ij} = r_{ref} \left( \frac{I_{ref}}{I_{ij}} \right)^{1/6} \quad (1)$$

Where  $I_{ij}$  represents the multiplicity-corrected volume integral of the crosspeak involving nuclei  $i$  and  $j$ . For crosspeaks involving only two protons,  $I_{ij}$  is simply equal to the measured crosspeak integral  $I_{meas}$ . For crosspeaks involving groups with multiple equivalent or stereo-unassigned protons, the measured integral is corrected using **Equation 2**:

$$I_{ij} = \frac{I_{meas}}{n_i \times n_j} \quad (2)$$

Where  $n_i$  is the number of nuclei  $i$  and  $n_j$  is the number of nuclei  $j$ .

### Selection of reference distances

Two major factors must be considered in selecting a ROESY crosspeak to use as a reference distance. First, and most obviously, the internuclear distance between the two protons forming the

crosspeak must be known and fixed. Second, also obviously, the crosspeak must be well separated from other peaks in the spectrum to ensure accurate integration.

For pentamer **2a**, the diastereotopic methylene CH<sub>2</sub> protons are well-resolved from one another, and the methyl CH<sub>3</sub> of the ethyl sidechain of [γ(**I**)]<sub>4</sub> are at a fixed distance of 2.40 Å from these protons. The crosspeak between one of these methylene protons and the CH<sub>3</sub> was used as the reference distance (after multiplicity correction by dividing the integral by 3).

Hexamer **S11** also featured well-resolved diastereotopic methylene protons on the ethyl sidechain of [γ(**I**)]<sub>4</sub>, and the 2.40 Å distance between one of these protons and the CH<sub>3</sub> methyl protons was used as the reference distance after multiplicity correction.

In octamer **S12**, the two diastereotopic methylene protons of the ethyl sidechain of γ(**I**) were found to be well resolved. The selected reference distance was the 2.40 Å fixed distance between one of these protons and the well-resolved methyl protons, with multiplicity 3, of the ethyl sidechain.

The design of nonamer **4** included 4-bromobenzyl ester as the C-terminal protecting group in order to incorporate well-resolved *ortho*-aryl protons, each of multiplicity 2, with a covalently-fixed internuclear distance of 2.80 Å. Zero-quantum artifacts made integration of these peaks difficult. The positive and negative phases were found to be approximately equivalent, and the absolute values of these were added to provide  $I_{ref}$  after division by the product of the number of protons involved in this crosspeak ( $2 \times 2 = 4$  in this case).

The diastereotopic H<sub>β</sub> of residue [Phe]<sub>3</sub> in octamer **5**, fixed at 1.78 Å from one another, were sufficiently well resolved for them to be used as the fixed reference distance.

### c. Model Helices

In order to provisionally assign non-sequential NOEs to a particular secondary structure, helical conformations of model α/γ(**I**)-peptide **S16** were constructed with several different H-bonding patterns (**Figure S4**). Observed non-sequential NOEs were compared to the expected NOEs of each model, and the model with the greatest number of expected NOEs observed experimentally was assigned as the likeliest candidate. Model α/γ(**I**)-peptide helices were constructed by using Avogadro software<sup>S7</sup> to build the appropriate sidechains of L-valine and (*S,S,R*)-EtACHA onto the .pdb files included in the Supporting Information in Hofmann *et al.*'s computational study of the unsubstituted α/γ-peptide backbone.<sup>S8</sup> The helical conformations investigated were the 12/10-helix, the 12-helix, and the 20/18-helix, since these were the lowest energy conformations found of the unsubstituted α/γ-peptide backbone by Hofmann that featured the α-residue in an allowed region of the Ramachandran plot. Other conformations, including the 10/12- and 18/20-helix, were excluded since they would require α-residues to adopt φ/ψ dihedral angles in forbidden regions of the Ramachandran plot. Molecular mechanics geometry optimization within Avogadro was performed prior to Gaussian 09<sup>S9</sup> geometry optimization at the B3LYP/6-31G level of theory using WebMO<sup>S10</sup> as the submission interface. PyMOL<sup>S11</sup> was used to calculate proton internuclear distances of the structures.

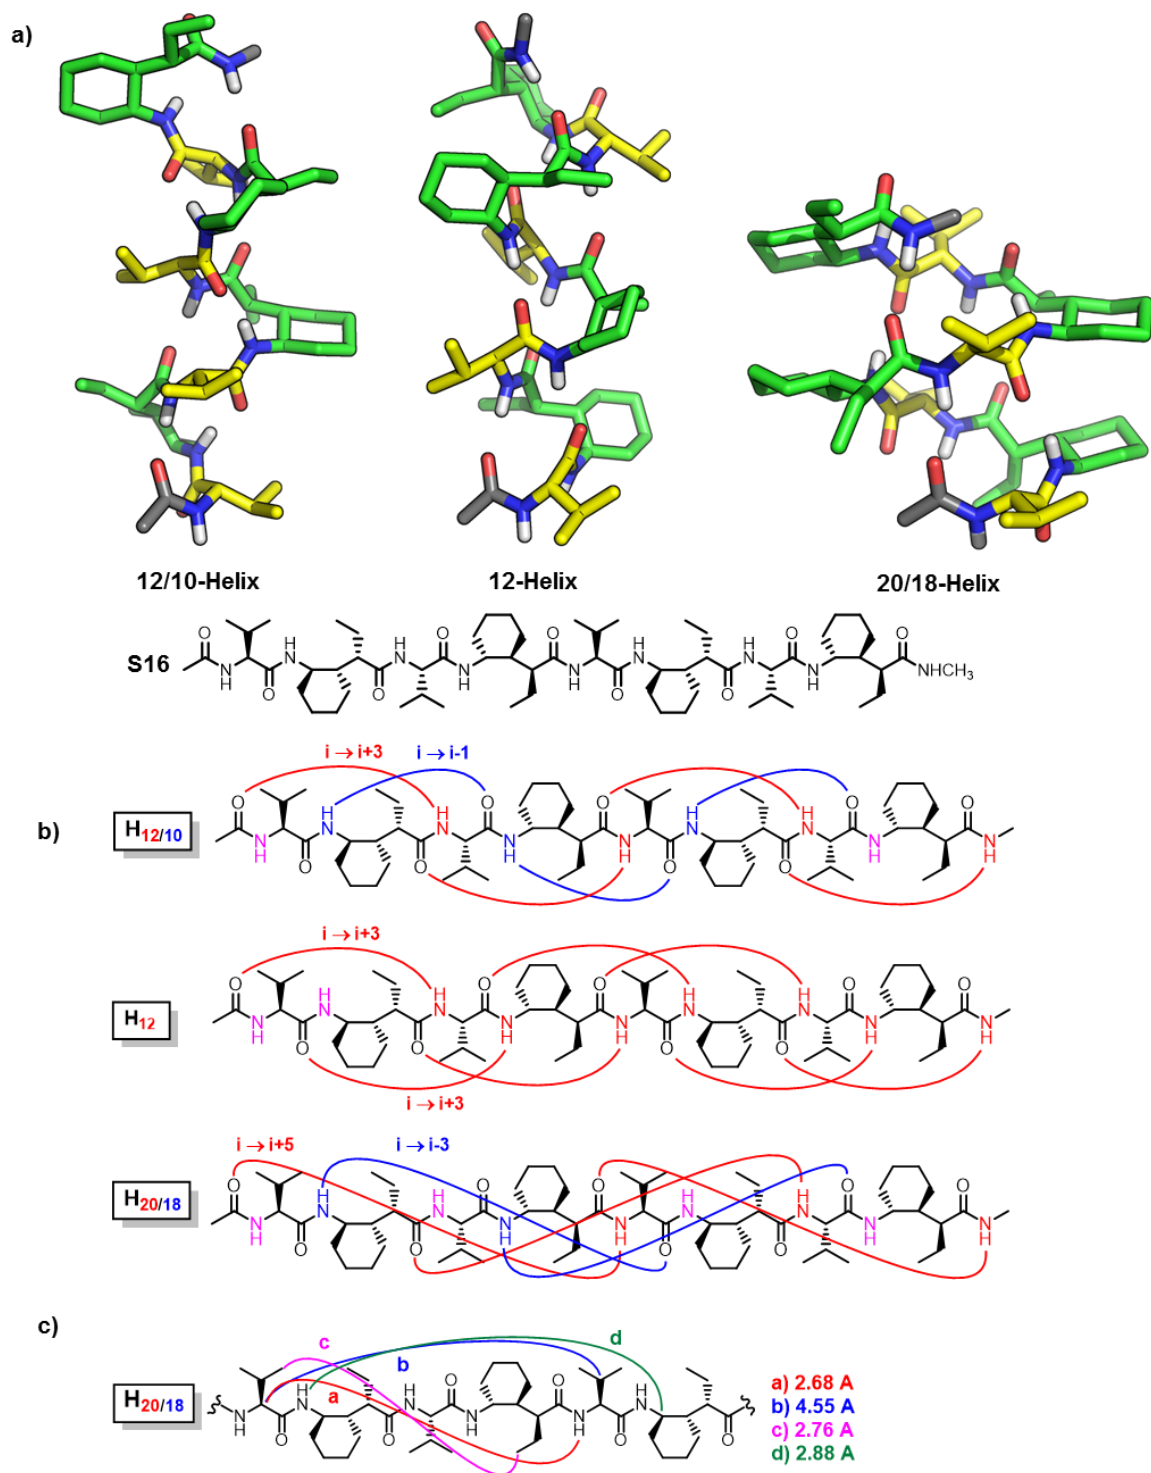

**Figure S4.** a) B3LYP/6-31G structures of the 12/10-, 12-, and 20/18-helical conformations of **S16**. Gray represents terminal acetyl and methylamide caps, yellow represents  $\alpha$ -residues, and green represents  $\gamma$ -residues. b) H-bonding patterns in the helical conformations. c) Expected NOEs in the 20/18-helical conformation. None are observed in the ROESY spectra of **2a**, **S11**, **4**, **5**, or **S12**.

### d. Resonance Assignments and ROESY-Derived Interproton Distances of 2a, S11, 4, 5, and S12

Table S2. Resonance assignment of 2a

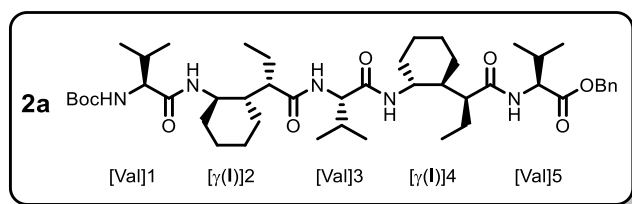

| Residue Number    | Backbone |          |         |          | Sidechain        |              |
|-------------------|----------|----------|---------|----------|------------------|--------------|
|                   | NH       | $\gamma$ | $\beta$ | $\alpha$ | $\beta 2$        | $\gamma 3$   |
| <b>N-Terminus</b> |          |          |         |          | Boc: 1.428       |              |
| [Val]1            | 4.965    |          |         | 3.875    | 1.884            | 0.987        |
| [ $\gamma$ (I)]2  | 6.762    | 3.646    |         | 2.125    | 1.430, 1.498     | 0.765        |
| [Val]3            | 7.743    |          |         | 3.631    | 1.968            | 0.993        |
| [ $\gamma$ (I)]4  | 5.796    | 5.796    |         | 2.321    | 1.468, 1.640     | 0.860        |
| [Val]5            | 7.926    |          |         | 4.612    | 2.231            | 0.909, 0.959 |
| <b>C-Terminus</b> |          |          |         |          | Bn: 5.087, 5.226 | Ph: 7.370    |

Table S3. ROESY crosspeaks of 2a

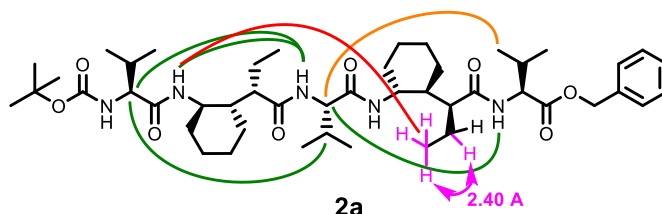

| Strong<br>1.8 - 3.0 Å | Medium<br>3.0 - 3.5 Å | Weak<br>3.5 - 4.5 Å | Very weak<br>> 4.50 Å | .....<br>Uncertain<br>Integral | .....<br>Reference<br>distance |
|-----------------------|-----------------------|---------------------|-----------------------|--------------------------------|--------------------------------|
|-----------------------|-----------------------|---------------------|-----------------------|--------------------------------|--------------------------------|

| Atom 1                        | Atom 2                | Distance | Designation |
|-------------------------------|-----------------------|----------|-------------|
| <b>Reference distance</b>     |                       |          |             |
| [ $\gamma$ (I)]4(Et12)        | [ $\gamma$ (I)]4(Et2) | 2.40     |             |
| <b>Sequential NOEs</b>        |                       |          |             |
| [Val]1(H $\alpha$ )           | [ $\gamma$ (I)]2(HN)  | 2.0      | Strong      |
| [ $\gamma$ (I)]2(Et2)         | [Val]3(HN)            | 3.1      | Medium      |
| [ $\gamma$ (I)]2(H $\alpha$ ) | [Val]3(HN)            | 1.9      | Strong      |
| [ $\gamma$ (I)]2(Et2)         | [Val]3(H $\alpha$ )   | 3.0      | Medium      |
| [Val]3(H $\alpha$ )           | [ $\gamma$ (I)]4(HN)  | 1.9      | Strong      |
| [Val]3(HG)                    | [ $\gamma$ (I)]4(HN)  | 3.3      | Medium      |
| [ $\gamma$ (I)]4(H $\alpha$ ) | [Val]5(HN)            | 1.9      | Strong      |
| [ $\gamma$ (I)]4(Et2)         | [Val]5(HN)            | 3.7      | Weak        |
| <b>Non-sequential NOEs</b>    |                       |          |             |
| [Val]1(H $\alpha$ )           | [Val]3(HB)            | 2.3      | Strong      |
| [Val]1(H $\alpha$ )           | [Val]3(HN)            | 2.4      | Strong      |
| [ $\gamma$ (I)]2(HN)          | [ $\gamma$ (I)]4(Et2) | 3.7      | Weak        |
| [ $\gamma$ (I)]2(HN)          | [Val]3(HN)            | 2.3      | Strong      |

|                     |                      |     |        |
|---------------------|----------------------|-----|--------|
| [Val]3(H $\alpha$ ) | [Val]5(H $\gamma$ 1) | 3.0 | Medium |
| [Val]3(H $\alpha$ ) | [Val]5(HN)           | 2.4 | Strong |
| [Val]3(H $\alpha$ ) | [Val]5(Ph)           | 3.6 | Weak   |

**Table S4.** Resonance assignment of **S11**

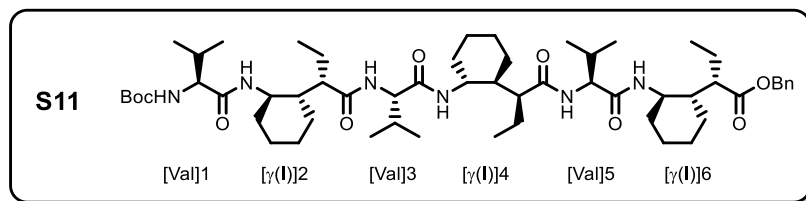

| Residue Number    | Backbone |          |         |          | Sidechain  |            |
|-------------------|----------|----------|---------|----------|------------|------------|
|                   | NH       | $\gamma$ | $\beta$ | $\alpha$ | $\beta$ 2  | $\gamma$ 3 |
| <b>N-Terminus</b> |          |          |         |          | Boc: 1.421 |            |
| [Val]1            | 4.935    |          |         | 3.989    | 1.869      | 1.002      |
| [ $\gamma$ (I)]2  | 6.846    | 3.633    | 1.724   | 2.085    |            | 0.727      |
| [Val]3            | 8.004    |          |         | 3.611    | 1.949      | 0.980      |
| [ $\gamma$ (I)]4  | 6.698    | 3.727    | 1.955   | 2.446    |            | 0.894      |
| [Val]5            | 7.816    |          |         | 4.321    | 2.342      | 0.978      |
| [ $\gamma$ (I)]6  | 6.069    | 3.649    | 2.032   | 2.546    |            | 0.802      |
| <b>C-Terminus</b> |          |          |         |          | Bn: 5.148  | Ph: 7.331  |

**Table S5.** ROESY crosspeaks of **S11**

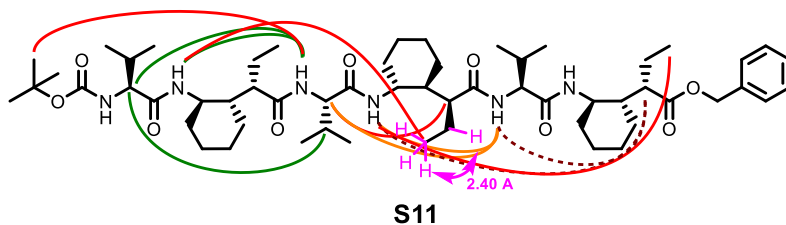

|                       |                       |                     |                       |                       |                       |
|-----------------------|-----------------------|---------------------|-----------------------|-----------------------|-----------------------|
| Strong<br>1.8 - 3.0 A | Medium<br>3.0 - 3.5 A | Weak<br>3.5 - 4.5 A | Very weak<br>> 4.50 A | Uncertain<br>Integral | Reference<br>distance |
|-----------------------|-----------------------|---------------------|-----------------------|-----------------------|-----------------------|

| Atom 1                        | Atom2                         | Distance | Designation |
|-------------------------------|-------------------------------|----------|-------------|
| <b>Reference distance</b>     |                               |          |             |
| [ $\gamma$ (I)]4(Et12)        | [ $\gamma$ (I)]4(Et2)         | 2.4      |             |
| <b>Sequential NOEs</b>        |                               |          |             |
| [Val]1(H $\alpha$ )           | [ $\gamma$ (I)]2(HN)          | 1.9      | Strong      |
| [ $\gamma$ (I)]2(HN)          | [ $\gamma$ (I)]2(H $\alpha$ ) | 2.5      | Strong      |
| [ $\gamma$ (I)]2(H $\alpha$ ) | [Val]3(HN)                    | 1.9      | Strong      |
| [ $\gamma$ (I)]2(Et2)         | [Val]3(HN)                    | 3.2      | Medium      |
| [ $\gamma$ (I)]2(HN)          | [Val]3(HN)                    | 2.5      | Strong      |
| [Val]3(H $\alpha$ )           | [ $\gamma$ (I)]4(H $\alpha$ ) | 3.7      | Weak        |
| [Val]3(H $\alpha$ )           | [ $\gamma$ (I)]4(HN)          | 2.0      | Strong      |
| [ $\gamma$ (I)]4(H $\alpha$ ) | [Val]5(HN)                    | 1.9      | Strong      |
| [ $\gamma$ (I)]4(Et2)         | [Val]5(HN)                    | 2.9      | Strong      |
| [ $\gamma$ (I)]4(Et2)         | [Val]5(H $\alpha$ )           | 3.7      | Medium      |

|                            |                               |                 |           |
|----------------------------|-------------------------------|-----------------|-----------|
| [Val]5(H $\alpha$ )        | [ $\gamma$ (I)]6(HN)          | 2.3             | Strong    |
| [Val]5(H $\beta$ )         | [ $\gamma$ (I)]6(HN)          | 2.6             | Strong    |
| [Val]5(H $\gamma$ )        | [ $\gamma$ (I)]6(HN)          | 3.4             | Medium    |
| [Val]5(HN)                 | [ $\gamma$ (I)]6(HN)          | 2.4             | Strong    |
| <b>Non-sequential NOEs</b> |                               |                 |           |
| [Val]1(Boc)                | [Val]3(HN)                    | 4.0             | Weak      |
| [Val]1(H $\alpha$ )        | [Val]3(HN)                    | 2.5             | Strong    |
| [Val]1(H $\alpha$ )        | [Val]3(H $\beta$ )            | 2.4             | Strong    |
| [ $\gamma$ (I)]2(HN)       | [ $\gamma$ (I)]4(Et2)         | 3.1             | Medium    |
| [Val]3(H $\alpha$ )        | [Val]5(HN)                    | 3.1             | Medium    |
| [Val]3(H $\alpha$ )        | [ $\gamma$ (I)]6(Bn)          | 3.4             | Medium    |
| [ $\gamma$ (I)]4(HN)       | [Val]5(HN)                    | 3.3             | Medium    |
| [ $\gamma$ (I)]4(HN)       | [ $\gamma$ (I)]6(Bn)          | 4.6             | Weak      |
| [ $\gamma$ (I)]4(HN)       | [ $\gamma$ (I)]6(H $\alpha$ ) | $\approx 4.5^a$ | Very weak |
| [ $\gamma$ (I)]4(HN)       | [ $\gamma$ (I)]6(Et2)         | 3.8             | Weak      |
| [Val]5(H $\gamma$ )        | [ $\gamma$ (I)]6(Bn)          | 3.4             | Medium    |
| [Val]5(HN)                 | [ $\gamma$ (I)]6(H $\alpha$ ) | $\approx 4.5^a$ | Very weak |

<sup>a</sup>Too weak to reliably integrate

**Table S6.** Resonance assignment of **4**

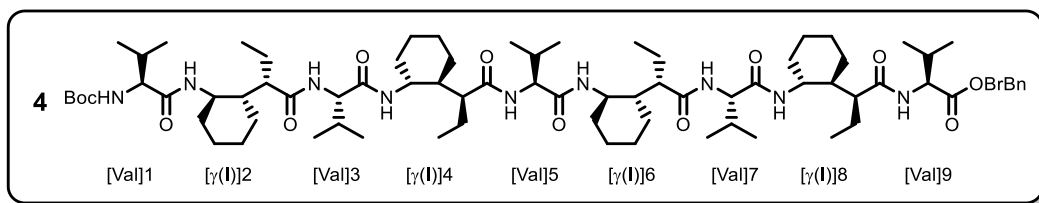

| Residue Number    | Backbone |          |         |          | Sidechain        |                     |
|-------------------|----------|----------|---------|----------|------------------|---------------------|
|                   | NH       | $\gamma$ | $\beta$ | $\alpha$ | $\beta$ 2        | $\gamma$ 3          |
| <b>N-Terminus</b> |          |          |         |          | Boc: 1.432       |                     |
| [Val]1            | 4.958    |          |         | 3.871    | 1.905            | 0.988               |
| [ $\gamma$ (I)]2  | 6.978    | 3.652    |         | 2.137    |                  | 0.766               |
| [Val]3            | 7.741    |          |         | 3.963    | 1.942            | 0.998               |
| [ $\gamma$ (I)]4  | 6.786    | 3.647    |         | 2.165    |                  | 0.817               |
| [Val]5            | 8.487    |          |         | 3.836    | 1.888            | 0.971               |
| [ $\gamma$ (I)]6  | 6.675    | 3.651    |         | 2.266    |                  | 0.817               |
| [Val]7            | 8.501    |          |         | 3.654    | 1.973            | 0.996               |
| [ $\gamma$ (I)]8  | 5.811    | 3.657    |         | 2.376    | 1.480, 1.627     | 0.845               |
| [Val]9            | 7.880    |          |         | 4.589    | 2.213            | 0.915; 0.955        |
| <b>C-Terminus</b> |          |          |         |          | Bn: 5.044, 5.188 | Ph1,2: 7.247, 7.500 |



**Table S7.** ROESY crosspeaks of **4**

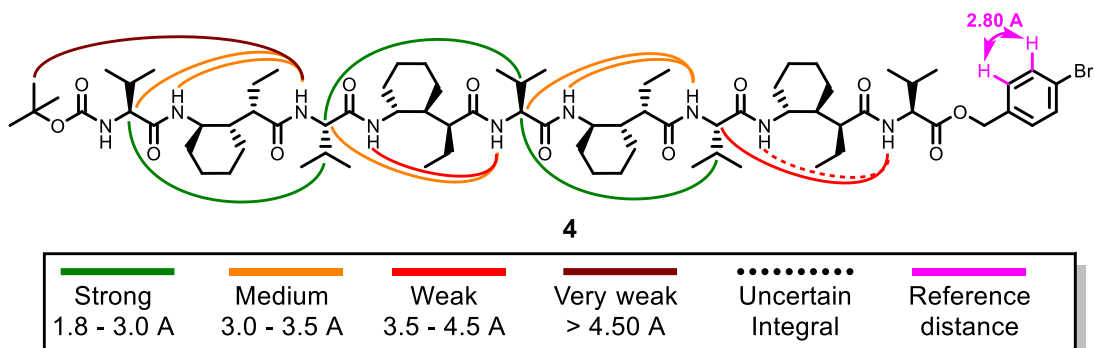

| Atom 1                        | Atom 2               | Distance        | Designation |
|-------------------------------|----------------------|-----------------|-------------|
| <b>Reference distance</b>     |                      |                 |             |
| Ph1                           | Ph2                  | 2.80            |             |
| <b>Sequential NOEs</b>        |                      |                 |             |
| [Val]1(H $\alpha$ )           | [ $\gamma$ (I)]2(HN) | 2.5             | Strong      |
| [Val]1(H $\gamma$ )           | [ $\gamma$ (I)]2(HN) | 3.9             | Weak        |
| [ $\gamma$ (I)]2(H $\alpha$ ) | [Val]3(HN)           | 2.5             | Strong      |
| [ $\gamma$ (I)]2(Et2)         | [Val]3(HN)           | 4.1             | Weak        |
| [Val]3(H $\alpha$ )           | [ $\gamma$ (I)]4(HN) | 2.5             | Strong      |
| [Val]3(H $\gamma$ )           | [ $\gamma$ (I)]4(HN) | 3.7             | Weak        |
| [ $\gamma$ (I)]4(H $\alpha$ ) | [Val]5(HN)           | 2.5             | Strong      |
| [Val]5(H $\alpha$ )           | [ $\gamma$ (I)]6(HN) | 2.4             | Strong      |
| [ $\gamma$ (I)]6(H $\alpha$ ) | [Val]7(HN)           | 2.5             | Strong      |
| [ $\gamma$ (I)]6(Et2)         | [Val]7(HN)           | 3.8             | Weak        |
| [ $\gamma$ (I)]8(H $\alpha$ ) | [Val]9(HN)           | 2.5             | Strong      |
| [ $\gamma$ (I)]8(Et2)         | [Val]9(HN)           | 4.3             | Weak        |
| <b>Non-sequential NOEs</b>    |                      |                 |             |
| [Val]1(Boc)                   | [Val]3(HN)           | 4.8             | Weak        |
| [Val]1(H $\alpha$ )           | [Val]3(H $\beta$ )   | 2.8             | Strong      |
| [Val]1(H $\alpha$ )           | [Val]3(HN)           | 3.2             | Medium      |
| [ $\gamma$ (I)]2(HN)          | [Val]3(HN)           | 3.2             | Medium      |
| [Val]3(H $\alpha$ )           | [Val]5(HN)           | 3.3             | Medium      |
| [Val]3(H $\alpha$ )           | [Val]5(H $\beta$ )   | 2.8             | Strong      |
| [ $\gamma$ (I)]4(HN)          | [Val]5(HN)           | 3.6             | Weak        |
| [Val]5(H $\alpha$ )           | [Val]7(H $\beta$ )   | 2.9             | Strong      |
| [Val]5(H $\alpha$ )           | [Val]7(HN)           | 2.7             | Strong      |
| [ $\gamma$ (I)]6(HN)          | [Val]7(HN)           | 3.3             | Medium      |
| [Val]7(H $\alpha$ )           | [Val]9(HN)           | 3.6             | Weak        |
| [Val]7(H $\alpha$ )           | [Val]9(H $\beta$ )   | $\approx 3.2^a$ | Medium      |
| [ $\gamma$ (I)]8(HN)          | [Val]9(HN)           | $\approx 4.8^a$ | Weak        |

<sup>a</sup>Approximate value due to crosspeak overlap in ROESY spectrum.

**Table S8.** Resonance assignment of **5**

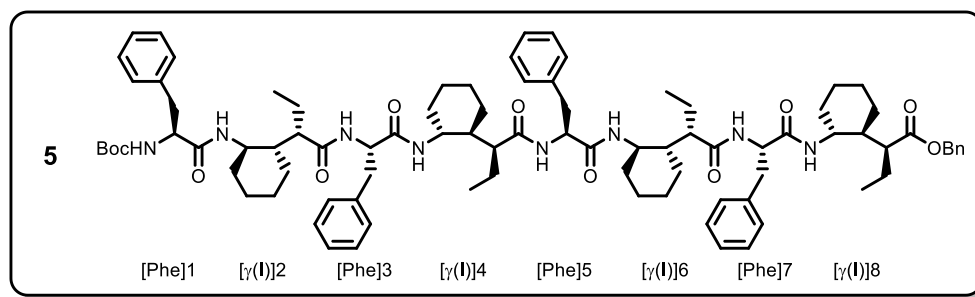

| Residue Number    | Backbone |       |   |       | Sidechain        |       |
|-------------------|----------|-------|---|-------|------------------|-------|
|                   | NH       | γ     | β | α     | β2               | γ3    |
| <b>N-Terminus</b> |          |       |   |       | Boc: 1.397       |       |
| [Phe]1            | 5.144    |       |   | 4.423 | 2.937, 3.035     |       |
| [γ(I)]2           | 6.868    | 3.581 |   | 2.156 |                  | 0.703 |
| [Phe]3            | 7.741    |       |   | 4.436 | 2.942, 3.070     |       |
| [γ(I)]4           | 6.537    | 3.475 |   | 2.119 |                  | 0.701 |
| [Phe]5            | 8.453    |       |   | 4.200 | 2.910, 3.022     |       |
| [γ(I)]6           | 6.233    | 3.501 |   | 2.188 |                  | 0.663 |
| [Phe]7            | 8.180    |       |   | 4.489 | 2.952, 3.137     |       |
| [γ(I)]8           | 5.859    | 3.636 |   | 2.449 |                  | 0.789 |
| <b>C-Terminus</b> |          |       |   |       | Bn: 5.010, 5.060 |       |

**Table S9.** ROESY crosspeaks of **5**

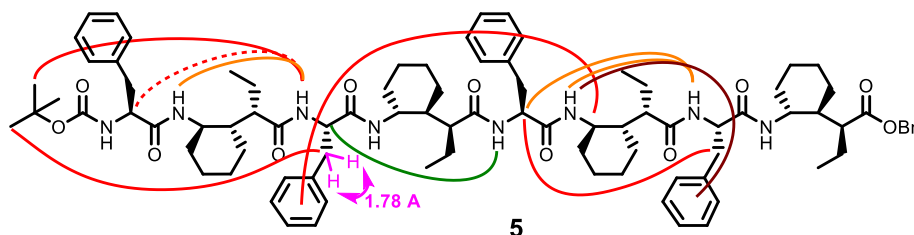

|                       |                       |                     |                       |                       |                       |
|-----------------------|-----------------------|---------------------|-----------------------|-----------------------|-----------------------|
| Strong<br>1.8 - 3.0 Å | Medium<br>3.0 - 3.5 Å | Weak<br>3.5 - 4.5 Å | Very weak<br>> 4.50 Å | Uncertain<br>Integral | Reference<br>distance |
|-----------------------|-----------------------|---------------------|-----------------------|-----------------------|-----------------------|

| Atom 1                    | Atom 2      | Distance | Designation |
|---------------------------|-------------|----------|-------------|
| <b>Reference distance</b> |             |          |             |
| [Phe]3(Hβ1)               | [Phe]3(Hβ2) | 1.78     |             |
| <b>Sequential NOEs</b>    |             |          |             |
| [Phe]1(Hα)                | [γ(I)]2(HN) | 2.3      | Strong      |
| [γ(I)]2(Hα)               | [Phe]3(HN)  | 2.0      | Strong      |
| [γ(I)]2(Et2)              | [Phe]3(Hα)  | 3.8      | Weak        |
| [γ(I)]2(Et2)              | [Phe]3(HN)  | 4.0      | Weak        |
| [Phe]3(Hα)                | [γ(I)]4(HN) | 2.4      | Strong      |
| [γ(I)]4(Hα)               | [Phe]5(Hβ1) | 3.1      | Medium      |
| [γ(I)]4(Hα)               | [Phe]5(HN)  | 2.0      | Strong      |
| [γ(I)]4(Et2)              | [Phe]5(Hα)  | 4.0      | Weak        |
| [γ(I)]4(Et2)              | [Phe]5(Hβ1) | 3.7      | Weak        |
| [γ(I)]4(Et2)              | [Phe]5(Hβ2) | 3.9      | Weak        |

|                               |                               |                 |           |
|-------------------------------|-------------------------------|-----------------|-----------|
| [ $\gamma$ (I)]4(Et2)         | [Phe]5(HN)                    | 3.7             | Weak      |
| [Phe]5(H $\alpha$ )           | [ $\gamma$ (I)]6(HN)          | 2.1             | Strong    |
| [Phe]5(H $\alpha$ )           | [ $\gamma$ (I)]8(Bn)          | 3.4             | Medium    |
| [ $\gamma$ (I)]6(H $\alpha$ ) | [Phe]7(HN)                    | 1.8             | Strong    |
| [ $\gamma$ (I)]6(Et2)         | [Phe]7(HN)                    | 4.5             | Weak      |
| [Phe]7(H $\alpha$ )           | [ $\gamma$ (I)]8(HN)          | 2.3             | Strong    |
| [Phe]7(HN)                    | [ $\gamma$ (I)]8(HN)          | 2.3             | Strong    |
| <b>Non-sequential NOEs</b>    |                               |                 |           |
| [Phe]1(H $\alpha$ )           | [Phe]3(HN)                    | $\approx 5.0^a$ | Weak      |
| [Phe]1(Boc)                   | [Phe]3(H $\beta$ 1)           | 3.7             | Weak      |
| [Phe]1(Boc)                   | [Phe]3(HN)                    | 4.1             | Weak      |
| [ $\gamma$ (I)]2(HN)          | [Phe]3(HN)                    | 3.4             | Medium    |
| [Phe]3(H $\alpha$ )           | [Phe]5(HN)                    | 2.8             | Strong    |
| [Phe]3(Ph)                    | [ $\gamma$ (I)]6(H $\gamma$ ) | 3.5             | Medium    |
| [Phe]5(H $\alpha$ )           | [Phe]7(HN)                    | 3.2             | Medium    |
| [Phe]5(H $\alpha$ )           | [Phe]7(H $\beta$ 2)           | 3.6             | Weak      |
| [ $\gamma$ (I)]6(HN)          | [Phe]7(HN)                    | 3.8             | Weak      |
| [ $\gamma$ (I)]6(HN)          | [Phe]7(Ph)                    | 6.1             | Very weak |

<sup>a</sup>Approximate value due to crosspeak overlap in ROESY spectrum.

**Table S10.** Resonance assignment of **S12**

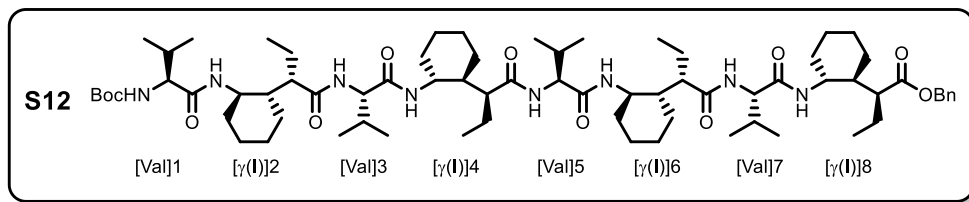

| Residue Number    | Backbone |          |         |          | Sidechain    |            |
|-------------------|----------|----------|---------|----------|--------------|------------|
|                   | NH       | $\gamma$ | $\beta$ | $\alpha$ | $\beta$ 2    | $\gamma$ 3 |
| <b>N-Terminus</b> |          |          |         |          | Boc: 1.442   |            |
| <b>Val1</b>       | 4.943    |          |         | 3.853    | 1.894        | 0.996      |
| <b>Gam2</b>       | 7.079    | 3.644    |         | 2.140    |              | 0.759      |
| <b>Val3</b>       | 7.787    |          |         | 4.061    | 1.919        | 1.015      |
| <b>Gam4</b>       | 6.781    | 3.632    |         | 2.156    |              | 0.746      |
| <b>Val5</b>       | 8.700    |          |         | 3.567    | 1.885        | 0.960      |
| <b>Gam6</b>       | 6.741    | 3.729    |         | 2.489    | 1.495; 1.669 | 0.882      |
| <b>Val7</b>       | 7.831    |          |         | 4.352    | 2.361        | 0.988      |
| <b>Gam8</b>       | 6.090    | 3.647    |         | 2.553    | 1.550; 1.643 | 0.818      |
| <b>C-Terminus</b> |          |          |         |          | Bn: 5.153    | Ph: 7.329  |



|                                               |                               |     |        |
|-----------------------------------------------|-------------------------------|-----|--------|
| [ $\gamma$ (I)]4(HN)                          | [Val]5(HN)                    | 3.2 | Medium |
| [ $\gamma$ (I)]4(HN)                          | [Val]5(H $\beta$ )            | 2.8 | Strong |
| [Val]5(H $\alpha$ )                           | [ $\gamma$ (I)]6(H $\alpha$ ) | 3.3 | Medium |
| [Val]5(H $\alpha$ )                           | [Val]7(HN)                    | 3.4 | Medium |
| [ $\gamma$ (I)]6(HN)                          | [Val]7(HN)                    | 3.0 | Medium |
| <b>Non-sequential, non-12/10-helical NOEs</b> |                               |     |        |
| [Val]5(H $\alpha$ )                           | [ $\gamma$ (I)]8(H $\alpha$ ) | 2.9 | Strong |
| [Val]5(H $\alpha$ )                           | [ $\gamma$ (I)]8(Et2)         | 3.4 | Medium |
| [Val]5(H $\alpha$ )                           | [ $\gamma$ (I)]8(Bn)          | 3.3 | Medium |
| [Val]5(H $\gamma$ )                           | [ $\gamma$ (I)]8(Bn)          | 4.0 | Weak   |
| [Val]5(H $\gamma$ )                           | [ $\gamma$ (I)]8(Ph)          | 4.9 | Weak   |
| [ $\gamma$ (I)]6(HN)                          | [ $\gamma$ (I)]8(H $\alpha$ ) | 2.4 | Strong |
| [ $\gamma$ (I)]6(HN)                          | [ $\gamma$ (I)]8(Bn)          | 3.8 | Weak   |
| [Val]7(HN)                                    | [ $\gamma$ (I)]8(HN)          | 2.8 | Strong |
| [Val]7(H $\gamma$ )                           | [ $\gamma$ (I)]8(H $\alpha$ ) | 3.5 | Weak   |

### e. NOE Pattern Analysis

#### 12/10-Helical NOEs vs. Non-12/10-Helical NOEs of Foldamers Containing C-terminal $\gamma$ (I)

Most non-sequential NOEs of compounds **2a**, **S11**, **4**, **5**, and **S12** were consistent with the 12/10-helical structure as determined by comparison with crystal **2a** and model helices (**Table S12**). NOEs involving C-terminal residues [ $\gamma$ (I)]6 in compound **S11** and residue [ $\gamma$ (I)]8 in compound **S12** are not expected for an ideal 12/10-helix adopted uniformly along the foldamer sequence, however, raising a few possibilities: that these peptides prefer a different type of helix structure; that they exhibit significant conformational heterogeneity; or that the C-terminal residues adopt a backbone conformation distinct from those of the other residues comprising the 12/10-helical foldamer. Although crystallographic evidence points to the 12/10-helix as the preferred secondary structure of  $\alpha/\gamma$ (I)-peptides, it is not *a priori* certain that this trend follows to the solution phase or to longer foldamers. Short  $\alpha$ -peptides are known to have a “split personality” in their population of both the  $3_{10}$ - and  $\alpha$ -helix in solution,<sup>S12</sup> and length-dependent conformational switching has been reported in hybrid  $\alpha/\beta$ -peptides forming mixed<sup>S13</sup> and polar<sup>S14</sup> helices. Careful consideration of the 2D-NMR data in relation to model helices (*vide supra*) would be useful in evaluating the possibilities.

**Table S12** below shows a comparison of the NOE-calculated interproton distances between protons in non-sequential residues of **S12** with the crystal of **2a** and interproton distances found in the model helices. The NOE pattern clearly indicates that the 20/18 helix is not the preferred solution secondary structure of **S12**. The crosspeaks observed correlate poorly with those expected for a 20/18-helical structure, and the expected crosspeaks are not detected. Interproton distances **a**, **b**, and **d** are similar in the model 12- and 12/10-helices, thus these experimental distances cannot distinguish the two structures unambiguously. Distance **c** points more to the 12/10-helix than the 12-helix. Strong and medium crosspeaks of **S12** are detected, although a weak crosspeak would have been expected for the 12-helix. The absence of distance **f** in the ROESY data is particularly strong evidence against the 12-helix. Distance **f** would be a sensitive probe of 12-helical secondary structure given the short spatial and atom connectivity distance between the protons, which are separated by only  $\approx 2.7$  Å and four atoms. The ROESY data indicate that the 12-helix is not the preferred secondary structure of **S12** and also suggest that the 12-helix is not highly populated.

**Table S12.** Comparison of crystal **2a**, model **S16** helices, and **S12** NOE-derived interproton distances

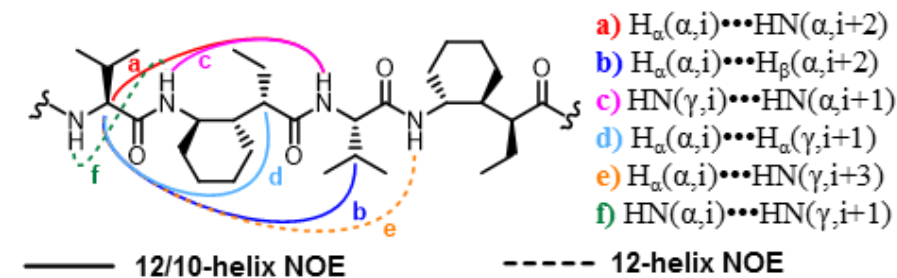

|                   | 2a Crystal<br>12/10-Helix | Model S16<br>12/10-helix | Model S16<br>12-helix | Model S16<br>20/18-helix | S12 NOE distances    |
|-------------------|---------------------------|--------------------------|-----------------------|--------------------------|----------------------|
| <b>Distance a</b> | 2.78                      | 2.66                     | 3.09                  | 4.70                     | 3.03 <sup>a</sup>    |
| <b>Distance b</b> | 2.47                      | 2.49                     | 3.16                  | 6.89                     | 2.40 <sup>b</sup>    |
| <b>Distance c</b> | 2.69                      | 2.82                     | 4.02                  | 4.38                     | 2.87 <sup>c</sup>    |
| <b>Distance d</b> | 4.14                      | 3.92                     | 4.07                  | 4.65                     | 4.0-4.5 <sup>d</sup> |
| <b>Distance e</b> | 5.02                      | 5.22                     | 3.08                  | 5.12                     | ND                   |
| <b>Distance f</b> | 4.39                      | 4.66                     | 2.73                  | 4.19                     | ND                   |

<sup>a</sup>[Val]3(H $\alpha$ )-[Val]5(H $\alpha$ )

<sup>b</sup>[Val]3(H $\alpha$ )-[Val]5(H $\beta$ )

<sup>c</sup>[\(\gamma\)(I)]2(HN)-[Val]3(HN)

<sup>d</sup>[Val]5(H $\alpha$ )-[\(\gamma\)(I)]6(H $\alpha$ ). Approximate distance due to crosspeak overlap.

The non-12/10-helical NOEs—those involving the C-terminal  $\gamma$ (I)-residue and not expected for an idealized 12/10-helix—point most strongly to a specific alternative conformation of this residue. This would not be unexpected, given the tendency of short peptides to fray at the termini and the fact that residue  $[\gamma$ (I)]8 cannot donate or accept 12/10-helical H-bonds. Still, the fact that the shortest non-sequential NOE involves this non-12/10-helical residue is curious, and NMR-restrained simulated annealing calculations were used to characterize the conformational properties of this residue in **S12**.

## f. NMR-Restrained Simulated Annealing Calculations of **2a**, **S11**, **S12**, **4**, and **5**

### NMR Calculation Parameters

The internuclear distances above, including sequential and non-sequential distances (but not intraresidue), were used as distance restraints in simulated annealing calculations of **2a**, **S11**, **S12**, **4**, and **5** using the Crystallography and NMR System (CNS v1.3) software package.<sup>S15</sup> Molecular topologies and parameters for the Boc and benzyl ester protecting groups were generated using the PRODRG2 Server.<sup>S16</sup> Topology for the BrBn ester protecting group was built manually, and parameters were generated using the ACPYPE script<sup>S17</sup> operating the ANTECHAMBER package of AmberTools14.<sup>S18</sup> Parameters for the  $\gamma$ (I)-residue were built manually, as were the linkage definitions needed to attach the protecting groups,  $\gamma$ -residues, and  $\alpha$ -residues together to form the foldamers.

Dihedral restraints were added to enforce chair conformations of the  $\gamma(\mathbf{I})$ -residue cyclohexyl ring. Boat and twist-boat conformations were frequently found among the trial structures in initial calculations (**Figure S5a**). The tendency of CNS to find thermodynamically unstable cyclohexyl conformations has been reported by our group<sup>S19</sup> and others.<sup>S20</sup> We found that adding one or two generous dihedral angle restraints to each cyclohexyl ring successfully directed the cyclohexyl

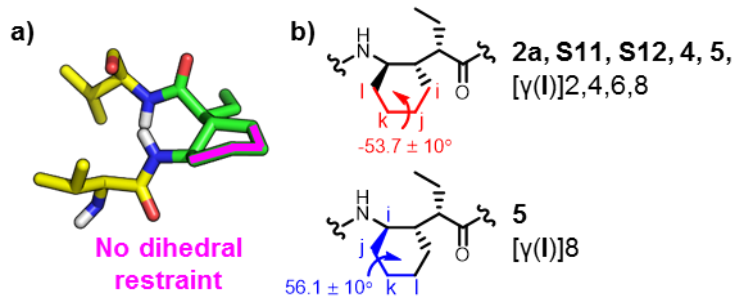

**Figure S5.** a) Twist-boat conformation produced in simulated annealing calculations of **S12** when no dihedral restraints are employed. b) Dihedral restraints used in simulated annealing calculations. Residue  $[\gamma(\mathbf{I})]8$  in foldamer **5** required two dihedral restraints to prevent twist-boat formation.

rings toward the expected chair conformation (**Figure S5b**). We do not believe that these restraints could significantly bias the trajectory of the simulations. A back-of-the-envelope calculation summing the energetic penalties of twist-boat adoption and approximate A-values of the *trans*-diaxial cyclohexane substituents has the twist-boat of  $\gamma(\mathbf{I})$  about 7-8 kcal mol<sup>-1</sup> higher in energy than the chair conformation. All final accepted structures featured no energetic penalty due to the dihedral restraints, thus the restraint did not influence the choice of accepted structures.

Molecular topology files (.mtf) were generated from the primary sequence using the generate-seq.inp input file included in the CNS software package. The molecular topology files were used as the input to construct extended structures (.pdb) using the generate-ext.inp input file. The .mtf file, the extended .pdb file, the distance restraint table, and a dihedral restraint table were the input data in the simulated annealing calculations using anneal.inp as the input file for 50 or 1000 trial structures. The hot stage was run at 10,000 K for 15 ps in 1000 torsion steps, using 0.1 Van der Waals scale factor, 150 NOE scale factor, and 100 dihedral restraint scale factor. The 1<sup>st</sup> cooling stage was run from 10,000 K to 0 K in 1000 torsion steps and a 50 K temperature step, using 0.1 → 1.0 Van der Waals scale factor, 150 NOE scale factor, and 200 dihedral restraint scale factor. The 2<sup>nd</sup> cooling stage was run from 300 K to 0 K for 15 ps in 3000 Cartesian steps with a 25 K temperature step, using 1.0 → 4.0 Van der Waals scale factor, 150 NOE scale factor, and 200 dihedral restraint scale factor. A final minimization stage with 10 cycles of 200-step minimization with a 75 NOE scale factor and 400 dihedral scale factor. The 10 structures of the 500 or 1000 trial structures with the lowest overall energy were selected with the accept.inp input file.

Accepted structures were visualized using PyMOL v1.7.0.3.<sup>S11</sup> Alignment of ensemble structures to crystal structures was performed using the “align” command of PyMOL.

**Table S13.** CNS simulated annealing calculation statistics for **2a**, **S11**, **S12**, **4**, and **5**

|                     | <b>2a</b> | <b>S11</b> | <b>S12</b> | <b>4</b> | <b>5</b> |
|---------------------|-----------|------------|------------|----------|----------|
| Trial structures    | 1000      | 1000       | 500        | 1000     | 1000     |
| Distance restraints |           |            |            |          |          |

|                                                                 |               |               |               |               |               |
|-----------------------------------------------------------------|---------------|---------------|---------------|---------------|---------------|
| Total NOE                                                       | 14            | 27            | 35            | 24            | 20            |
| Intra-residue                                                   | 0             | 1             | 0             | 0             | 0             |
| Inter-residue                                                   | 14            | 26            | 35            | 24            | 20            |
| Sequential                                                      | 8             | 13            | 17            | 12            | 16            |
| Non-sequential                                                  | 6             | 13            | 18            | 12            | 8             |
| Hydrogen bond restraints                                        | 0             | 0             | 0             | 0             | 0             |
| Dihedral restraints                                             | 2             | 3             | 4             | 5             | 5             |
| <b>Restraint violations</b>                                     |               |               |               |               |               |
| Distance restraint violations > 0.5 Å                           | 0.00 ± 0.00   | 0.80 ± 0.42   | 0.20 ± 0.422  | 0.00 ± 0.00   | 0.00 ± 0.00   |
| Dihedral restraint violations > 5°                              | 0.00 ± 0.00   | 0.00 ± 0.00   | 0.00 ± 0.00   | 0.00 ± 0.00   | 0.00 ± 0.00   |
| <b>Deviations from idealized geometry</b>                       |               |               |               |               |               |
| Bond lengths (Å)                                                | 0.010 ± 0.000 | 0.011 ± 0.000 | 0.012 ± 0.000 | 0.011 ± 0.000 | 0.010 ± 0.000 |
| Bond angles (°)                                                 | 0.820 ± 0.001 | 0.924 ± 0.015 | 0.967 ± 0.019 | 0.859 ± 0.014 | 0.761 ± 0.023 |
| Impropers (°)                                                   | 0.550 ± 0.005 | 0.576 ± 0.106 | 0.561 ± 0.011 | 0.483 ± 0.184 | 0.381 ± 0.059 |
| <b>Average pairwise RMSD of 10 lowest-energy structures (Å)</b> |               |               |               |               |               |
| Backbone                                                        | 0.130 ± 0.073 | 0.371 ± 0.259 | 0.775 ± 0.284 | 2.00 ± 0.76   | 2.01 ± 0.59   |
| Heavy atom                                                      | 1.90 ± 0.63   | 1.32 ± 0.49   | 1.78 ± 0.55   | 3.14 ± 0.92   | 4.17 ± 1.01   |

### NMR Simulated Annealing Calculation Structures for 2a, S11, S12, 4, and 5

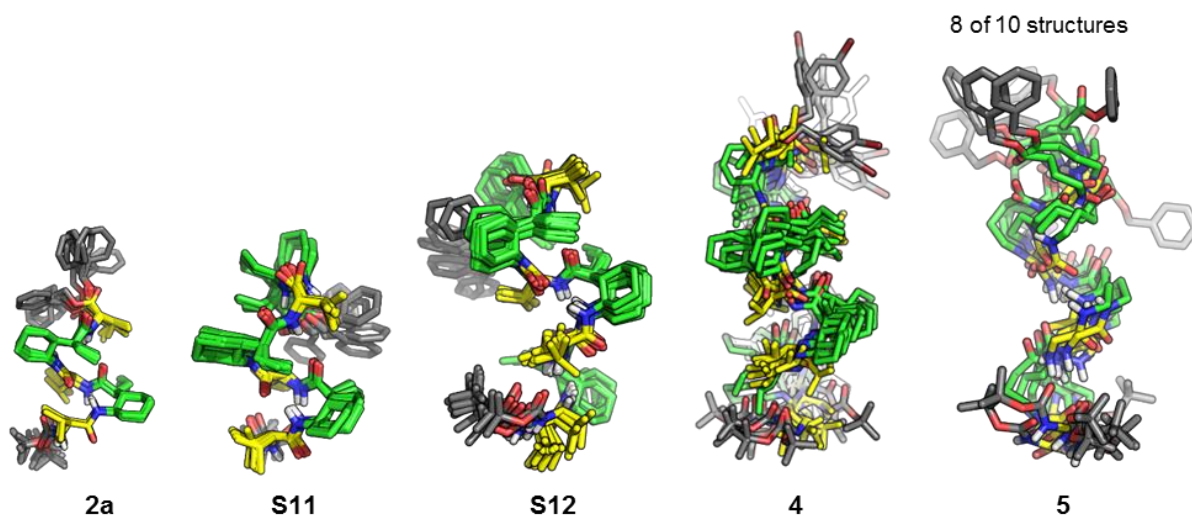

| Compound | 1           | 2      | 3     | 4      | 5     | 6      | 7     | 8      | 9     |         |
|----------|-------------|--------|-------|--------|-------|--------|-------|--------|-------|---------|
| 2a       | Boc - [Val] | [γ(I)] | [Val] | [γ(I)] | [Val] |        |       |        |       | - OBn   |
| S11      | Boc - [Val] | [γ(I)] | [Val] | [γ(I)] | [Val] | [γ(I)] |       |        |       | - OBn   |
| S12      | Boc - [Val] | [γ(I)] | [Val] | [γ(I)] | [Val] | [γ(I)] | [Val] | [γ(I)] |       | - OBn   |
| 4        | Boc - [Val] | [γ(I)] | [Val] | [γ(I)] | [Val] | [γ(I)] | [Val] | [γ(I)] | [Val] | - OBrBn |
| 5        | Boc - [Phe] | [γ(I)] | [Phe] | [γ(I)] | [Phe] | [γ(I)] | [Phe] | [γ(I)] |       | - OBn   |

**Figure S6.** Accepted 10 lowest-energy structures from simulated annealing calculations for peptides **2a**, **S11**, **S12**, and **4**, with 8 of 10 lowest-energy structures with sidechains removed for clarity of **5**.  $\alpha$ -Residues are depicted in yellow,  $\gamma$ -residues in green, and protecting groups in gray.



The 10-lowest-energy NMR structures of hexapeptide **S11** and octapeptide **S12**, the two foldamers with C-terminal  $\gamma(\mathbf{I})$ -residues, depict relatively tightly clustered backbone RMSDs which reveal a few unusual characteristics of the structures (**Figure S7a**). Seen most clearly in longer octapeptide **S12**, the helix curvature is greater than that seen in 12/10-helix crystal structures (**Figure S7b**). As shown in **Table S11**, the two C-terminal residues of both foldamers feature non-12/10-helical NOE patterns, and in the NMR ensembles these residues adopt conformations unlike the residues participating in the 12/10-helix (**Figure S7c**). The residue [Val]7 in **S12** adopts  $\alpha$ -helix-like  $\phi/\psi$  values enforced by the large ROESY crosspeak between HN( $\alpha,i$ ) and HN( $\gamma,i+1$ ) from [Val]7 to [ $\gamma(\mathbf{I})$ ]8 (distance **f** in **Table S12**). Another feature of the C-terminus in the calculated structures is a C15 H-bond from the benzyl ester C=O to the H-N of [ $\gamma(\mathbf{I})$ ]6. Since this H-bond acceptor is relatively weak, it is possible that this is an artifact of the calculations.

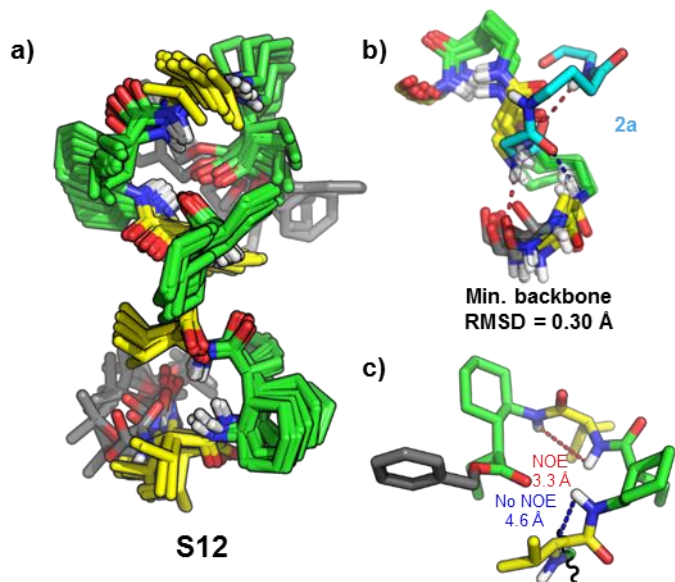

**Figure S7.** **a)** 10 lowest-energy NMR structures of **S12**. Protecting groups are shown in gray,  $\alpha$ -residues in yellow, and  $\gamma$ -residues in green. **b)** Backbone overlay of the first three residues of the **S12** NMR ensemble and crystal structure **2a**. **c)** C-terminus of minimized average structure, depicting the non-12/10-helical distance **f** (see **Table S12**) for 12/10-helical [Val]5 and [ $\gamma(\mathbf{I})$ ]6 (no NOE) and for non-12/10-helical [Val]7 and [ $\gamma(\mathbf{I})$ ]8 (NOE detected).

Since this H-bond acceptor is relatively weak, it is possible that this is an artifact of the calculations.

## V. DMSO Titrations

Peptides were dissolved to 1 mM in 500  $\mu\text{L}$  dry  $\text{CDCl}_3$  and transferred to a 5 mm NMR tube sealed with a rubber septum and Teflon tape. DMSO- $d_6$  was injected via a Hamilton syringe, the NMR tube was inverted 5 times and shaken to ensure homogeneity, and the  $^1\text{H}$ -NMR acquired on a Bruker Avance III 500 MHz spectrometer with 32 scans.

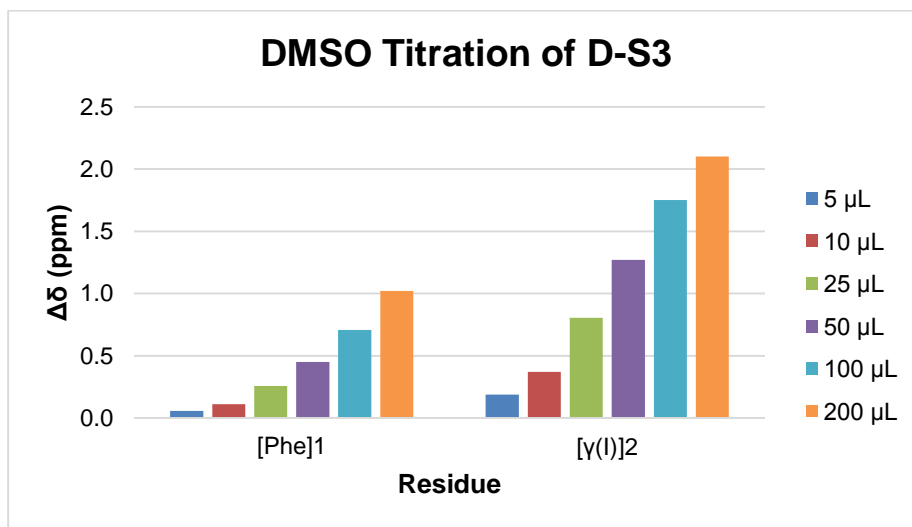

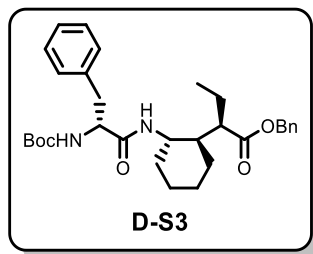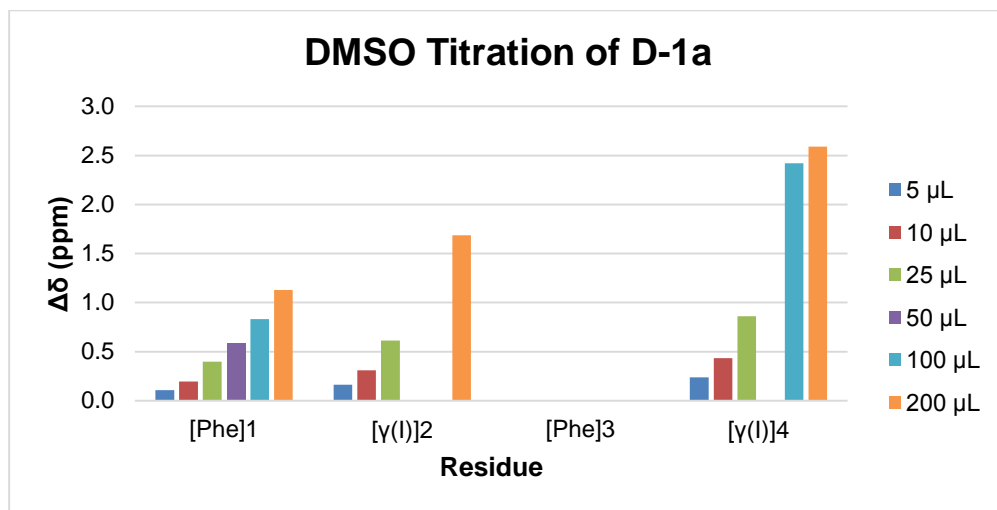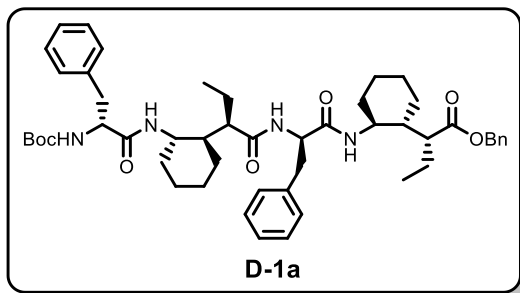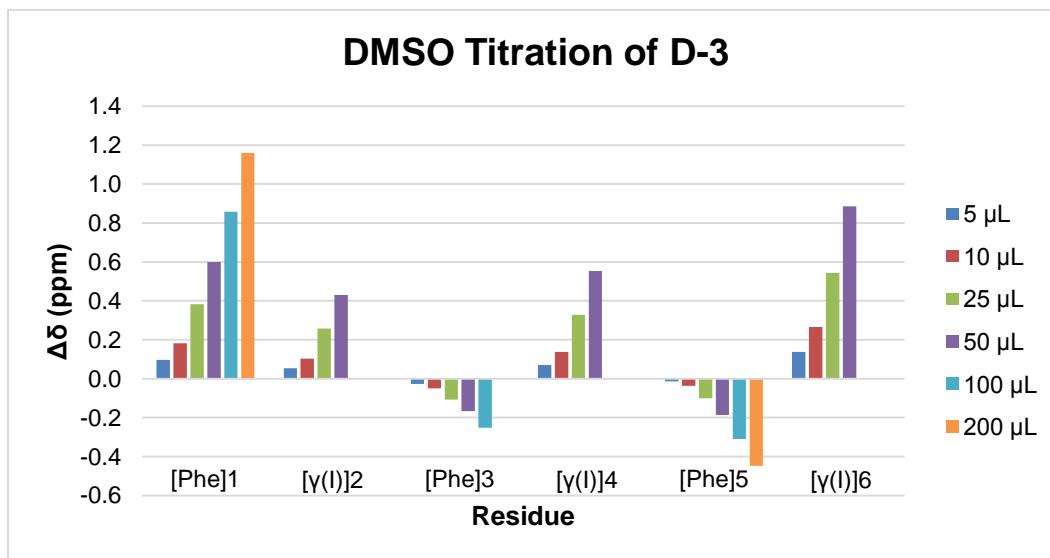

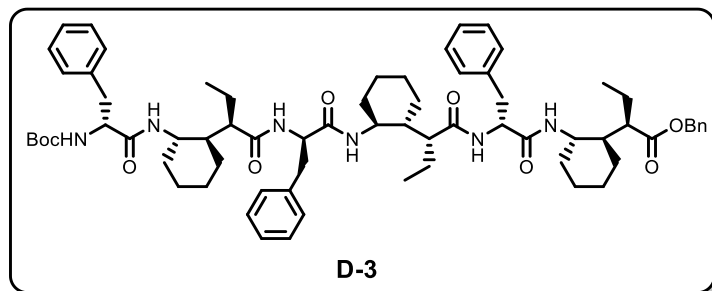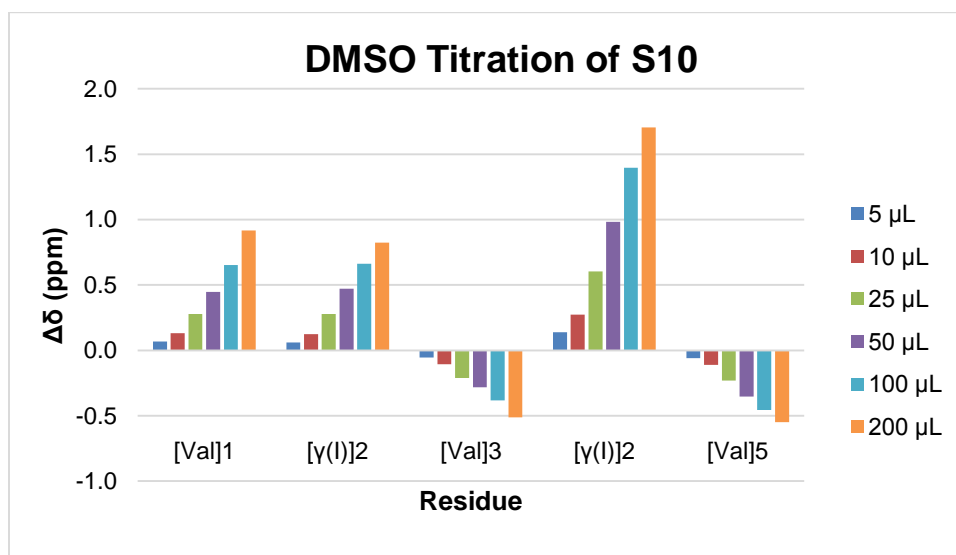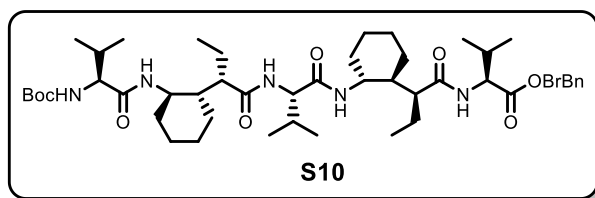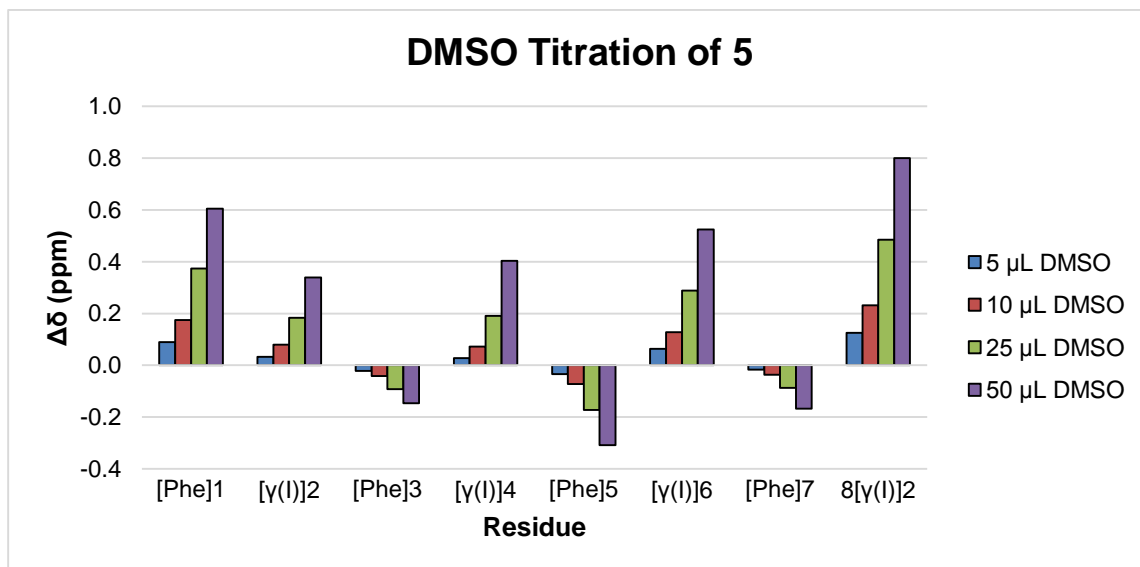

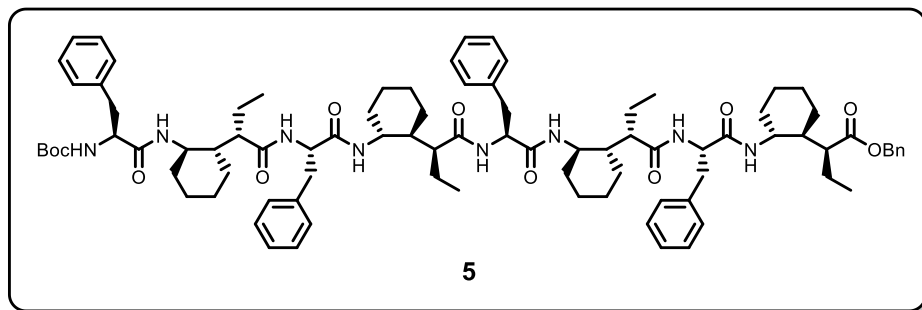

## VI. Hydrogen-Deuterium Exchange Experiments

Peptides were dissolved to 1 mM in 500  $\mu$ L  $\text{CDCl}_3$  purified by passage through basic alumina and stored over 3  $\text{\AA}$  molecular sieves, then transferred to a 5 mm NMR tube sealed with a rubber septum and Teflon tape.  $\text{CD}_3\text{OD}$  was injected via a Hamilton syringe, the NMR tube was inverted 5 times and shaken to ensure homogeneity, and  $^1\text{H}$ -NMR data were collected at regular intervals at 24°C on a Bruker Avance III 500 MHz spectrometer using the kin1d pulse program,  $d1 = 1$  sec, and  $ns = 32$  scans. Data were batch processed with MestReNova. Spectra were automatically phased, visually inspected, and manually phased as needed. Baseline correction was done using the ablative baseline correction algorithm. Integrals were defined manually. Half-lives were calculated by fitting an exponential decay function to the data using Microsoft Excel. Integrals below 0.09 were too near the baseline for reliable integration and excluded in the fit.

**Table S14.** HDX Integral Data<sup>a</sup> for **5**

| Elapsed time (hr) | [Phe]1 | [ $\gamma$ (I)]2 | [Phe]3 | [ $\gamma$ (I)]4 | [Phe]5 | [ $\gamma$ (I)]6 | [Phe]7 | [ $\gamma$ (I)]8 |
|-------------------|--------|------------------|--------|------------------|--------|------------------|--------|------------------|
| 0.00              |        |                  |        |                  |        |                  |        |                  |
| 0.06              | 0.765  | 0.674            | 0.794  | 0.652            | 0.709  |                  | 0.633  | 0.590            |
| 0.09              | 0.750  | 0.671            | 0.784  | 0.624            | 0.687  |                  | 0.621  | 0.581            |
| 0.12              | 0.746  | 0.674            | 0.784  | 0.635            | 0.701  |                  | 0.636  | 0.588            |
| 0.21              | 0.702  | 0.666            | 0.770  | 0.637            | 0.690  |                  | 0.613  | 0.565            |
| 0.29              | 0.679  | 0.674            | 0.775  | 0.632            | 0.697  |                  | 0.626  | 0.569            |
| 0.37              | 0.646  | 0.659            | 0.776  | 0.628            | 0.682  |                  | 0.625  | 0.563            |
| 0.46              | 0.616  | 0.657            | 0.764  | 0.625            | 0.689  |                  | 0.619  | 0.570            |
| 0.54              | 0.603  | 0.662            | 0.760  | 0.620            | 0.682  |                  | 0.621  | 0.570            |
| 0.62              | 0.587  | 0.669            | 0.775  | 0.630            | 0.696  |                  | 0.616  | 0.572            |
| 0.71              | 0.565  | 0.652            | 0.768  | 0.617            | 0.687  |                  | 0.619  | 0.573            |
| 0.79              | 0.532  | 0.646            | 0.743  | 0.610            | 0.679  |                  | 0.603  | 0.565            |
| 0.87              | 0.515  | 0.659            | 0.765  | 0.626            | 0.682  |                  | 0.609  | 0.579            |
| 0.96              | 0.511  | 0.663            | 0.758  | 0.620            | 0.681  |                  | 0.611  | 0.563            |
| 1.06              | 0.483  | 0.640            | 0.737  | 0.605            | 0.680  |                  | 0.605  | 0.563            |
| 1.16              | 0.471  | 0.650            | 0.755  | 0.614            | 0.684  |                  | 0.598  | 0.566            |
| 1.32              | 0.442  | 0.644            | 0.753  | 0.613            | 0.678  |                  | 0.603  | 0.565            |
| 1.49              | 0.414  | 0.645            | 0.746  | 0.614            | 0.679  |                  | 0.600  | 0.562            |
| 1.66              | 0.382  | 0.648            | 0.751  | 0.616            | 0.665  |                  | 0.597  | 0.541            |
| 1.82              | 0.362  | 0.645            | 0.754  | 0.614            | 0.681  |                  | 0.594  | 0.554            |
| 1.99              | 0.338  | 0.629            | 0.735  | 0.595            | 0.671  |                  | 0.588  | 0.559            |
| 2.16              | 0.320  | 0.640            | 0.742  | 0.602            | 0.676  |                  | 0.588  | 0.548            |
| 2.41              | 0.302  | 0.650            | 0.738  | 0.605            | 0.676  |                  | 0.598  | 0.553            |
| 2.66              | 0.268  | 0.643            | 0.736  | 0.612            | 0.679  |                  | 0.580  | 0.552            |
| 2.91              | 0.245  | 0.636            | 0.720  | 0.605            | 0.669  |                  | 0.570  | 0.544            |
| 3.16              | 0.226  | 0.628            | 0.715  | 0.600            | 0.672  |                  | 0.575  | 0.541            |

|        |       |       |       |       |       |       |       |
|--------|-------|-------|-------|-------|-------|-------|-------|
| 3.41   | 0.203 | 0.626 | 0.721 | 0.594 | 0.666 | 0.565 | 0.529 |
| 3.66   | 0.196 | 0.625 | 0.717 | 0.602 | 0.660 | 0.569 | 0.542 |
| 3.91   | 0.184 | 0.625 | 0.718 | 0.603 | 0.666 | 0.565 | 0.531 |
| 4.16   | 0.163 | 0.629 | 0.715 | 0.597 | 0.666 | 0.557 | 0.523 |
| 4.67   | 0.149 | 0.621 | 0.706 | 0.596 | 0.657 | 0.552 | 0.523 |
| 5.17   | 0.137 | 0.627 | 0.705 | 0.598 | 0.656 | 0.548 | 0.528 |
| 5.67   | 0.110 | 0.609 | 0.694 | 0.586 | 0.651 | 0.543 | 0.516 |
| 6.17   | 0.105 | 0.617 | 0.697 | 0.591 | 0.656 | 0.534 | 0.512 |
| 7.17   | 0.095 | 0.611 | 0.691 | 0.597 | 0.654 | 0.520 | 0.497 |
| 8.17   | 0.074 | 0.609 | 0.679 | 0.592 | 0.653 | 0.507 | 0.493 |
| 9.17   | 0.070 | 0.604 | 0.673 | 0.588 | 0.645 | 0.502 | 0.477 |
| 10.17  | 0.067 | 0.591 | 0.662 | 0.586 | 0.643 | 0.490 | 0.463 |
| 13.54  |       | 0.608 | 0.594 | 0.597 | 0.587 | 0.466 | 0.430 |
| 18.34  |       | 0.586 | 0.567 | 0.598 | 0.573 | 0.424 | 0.393 |
| 21.62  |       | 0.573 | 0.542 | 0.591 | 0.567 | 0.393 | 0.360 |
| 21.69  |       | 0.559 | 0.536 | 0.576 | 0.560 | 0.386 | 0.362 |
| 30.96  |       | 0.550 | 0.523 | 0.577 | 0.551 | 0.335 | 0.307 |
| 35.96  |       | 0.504 | 0.498 | 0.543 | 0.531 | 0.299 | 0.283 |
| 54.06  |       | 0.463 | 0.463 | 0.522 | 0.495 | 0.222 | 0.210 |
| 65.82  |       | 0.403 | 0.421 | 0.491 | 0.454 | 0.169 | 0.168 |
| 66.97  |       | 0.415 | 0.431 | 0.497 | 0.463 | 0.177 | 0.169 |
| 74.57  |       | 0.377 | 0.407 | 0.476 | 0.438 | 0.150 | 0.145 |
| 88.81  |       | 0.359 | 0.389 | 0.463 | 0.412 | 0.138 | 0.107 |
| 99.11  |       | 0.333 | 0.363 | 0.446 | 0.390 | 0.116 | 0.080 |
| 108.69 |       | 0.317 | 0.337 | 0.426 | 0.378 | 0.116 | 0.083 |
| 120.06 |       | 0.291 | 0.326 | 0.407 | 0.346 | 0.098 | 0.063 |
| 133.47 |       | 0.259 | 0.301 | 0.373 | 0.322 | 0.093 | 0.059 |
| 148.07 |       | 0.244 | 0.275 | 0.364 | 0.292 | 0.095 | 0.053 |

<sup>a</sup>Integration value relative to benzyl proton at  $\delta$  5.11 ppm = 1. <sup>b</sup>Chemical shift overlap with phenyl protons prevented reliable integration.

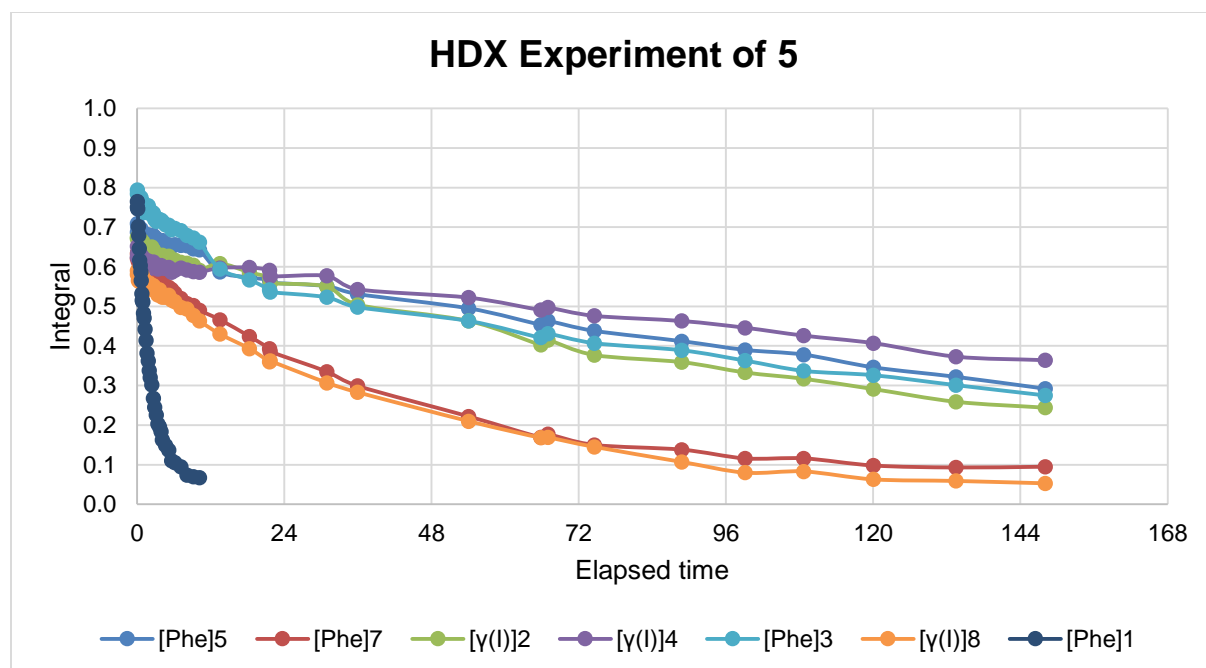

Figure S8. HDX data for peptide 5.

**Table S15.** HDX integral data<sup>a</sup> for **6**

| Elapsed time (hr) | [Phe]1 | [Y(I)]2 |
|-------------------|--------|---------|
| 0.06              | 0.890  | 0.943   |
| 0.16              | 0.836  | 0.938   |
| 0.26              | 0.832  | 0.938   |
| 0.34              | 0.780  | 0.873   |
| 0.42              | 0.730  | 0.903   |
| 0.51              | 0.651  | 0.867   |
| 0.59              | 0.673  | 0.913   |
| 0.67              | 0.606  | 0.885   |
| 0.76              | 0.547  | 0.879   |
| 0.84              | 0.531  | 0.818   |
| 0.92              | 0.476  | 0.830   |
| 1.01              | 0.467  | 0.817   |
| 1.39              | 0.376  | 0.759   |
| 1.64              | 0.336  | 0.788   |
| 1.89              | 0.312  | 0.803   |
| 2.14              | 0.256  | 0.749   |
| 2.39              | 0.243  | 0.742   |
| 2.64              | 0.207  | 0.701   |
| 2.89              | 0.195  | 0.719   |
| 3.14              | 0.125  | 0.648   |
| 3.39              | 0.155  | 0.667   |
| 3.64              | 0.123  | 0.629   |
| 3.89              | 0.143  | 0.633   |
| 4.14              | 0.102  | 0.632   |
| 4.69              | 0.084  | 0.564   |
| 5.69              | 0.039  | 0.492   |
| 6.69              | 0.000  | 0.454   |
| 7.69              |        | 0.400   |
| 8.69              |        | 0.425   |
| 9.69              |        | 0.400   |
| 10.69             |        | 0.322   |
| 11.69             |        | 0.358   |
| 12.69             |        | 0.304   |
| 13.69             |        | 0.268   |
| 21.41             |        | 0.152   |

<sup>a</sup>Integration value relative to valine H<sub>α</sub> at δ 4.56 ppm = 1.

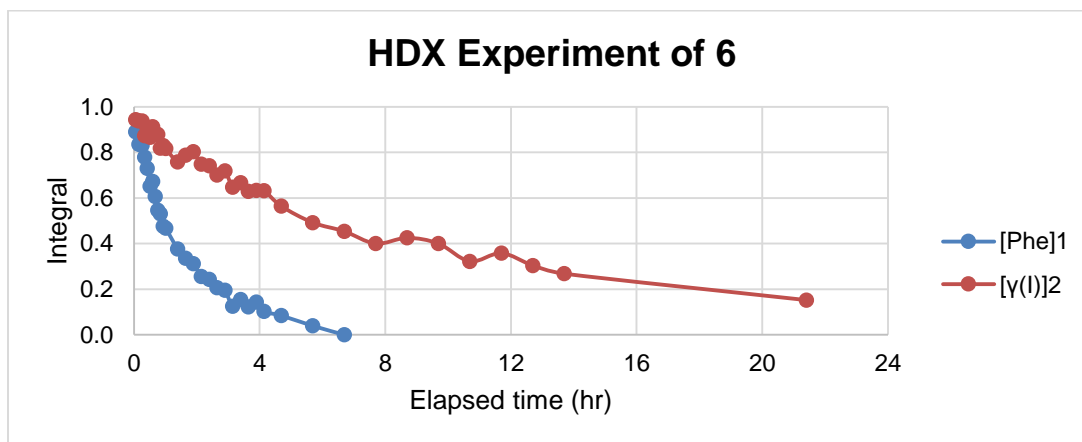

**Figure S9.** HDX data for peptide **6**.

## Design of Model Peptides for HDX

HDX half-lives of backbone amide NHs within short peptides without tertiary structure are mostly influenced by three factors: 1) the intrinsic half-life of the amino acid residue's amide NH; 2) the peptide's primary structure; that is, the steric and electronic influence of residues adjacent to the backbone amide NH; and 3) the peptide's secondary structure; that is, the HDX protection offered by intramolecular H-bond engagement. The HDX experiments reported here seek to measure the influence of only the third factor on the relative HDX rate of the two amide types— $\text{NH}_\alpha$  forming 12-membered H-bonds, and  $\text{NH}_\gamma$  forming 10-membered H-bonds—within  $\alpha/\gamma(\mathbf{I})$ -peptides. Since all three factors will differ for  $\text{NH}_\alpha$  of Phe and  $\text{NH}_\gamma$  of  $\gamma(\mathbf{I})$ , a model compound approximating the first two factors for each residue must be used. In other words, the model compound must include both Phe and  $\gamma(\mathbf{I})$  (factor 1 included), include the relevant proximal steric bulk around each amide (factor 2 included), and feature no strong H-bonding (factor 3 excluded). Any increase in HDX half-life from this model compound is attributed to an increase in H-bond engagement of the amide NH.

For amide  $\text{NH}_\alpha$  of Phe, the residues on either side of the Phe are likely to have an impact on HDX half-life. Model compounds **S14** and **S15** were assessed to test the validity of exchanging the group N-terminal of  $\text{NH}_\alpha$  from  $\gamma(\mathbf{I})$  to 2-ethylbutyryl in design of the final model compound (**Figure S10**). The 2-ethylbutyryl group is more desirable since it contains fewer H-bond donors/acceptors than the  $\gamma(\mathbf{I})$ -residue, and removing the possibility of intramolecular H-bonding will ensure that factor 3 is not operative in increasing HDX half-life of the model compound. The HDX half-lives of  $\text{NH}_\alpha$  in **S14** and **S15** were found to be 0.52 hr and 0.59 hr respectively, indicating that 2-ethylbutyryl is a good mimic of  $\gamma(\mathbf{I})$  for HDX studies.

Model compound **6** incorporates the 2-ethylbutyryl group N-terminal of Phe and  $\gamma(\mathbf{I})$  C-terminal of it. One intramolecular H-bond could plausibly be formed (**Figure S10**), although this H-bond type,  $\text{C}=\text{O}(\gamma,i)\rightarrow\text{H}-\text{N}(\alpha,i-1)$  has not been observed crystallographically. It should be noted that, if this H-bond is formed, Factor 3 will influence the HDX half-life of  $\text{NH}_\alpha$  in the model compound and thus will be longer. A relative increase from this HDX half-life to the HDX half-life of the full-length  $\alpha/\gamma(\mathbf{I})$ -peptide will thus be underestimated. Since this H-bond type is expected to be the stronger of the two, the potential H-bond in **6** would not strengthen the conclusions from the HDX data.

Compound **6** also features  $\text{NH}_\gamma$  in an environment similar to its context in  $\alpha/\gamma(\mathbf{I})$ -peptides. N-terminal of  $\gamma(\mathbf{I})$  is Phe, and the C-terminus is a benzyl ester instead of an amide in order to reduce the number of good H-bond acceptors and H-bond donors. Since this C-terminus is spatially distant from  $\text{NH}_\gamma$ , it should not have a large impact on HDX rate via factor 2.

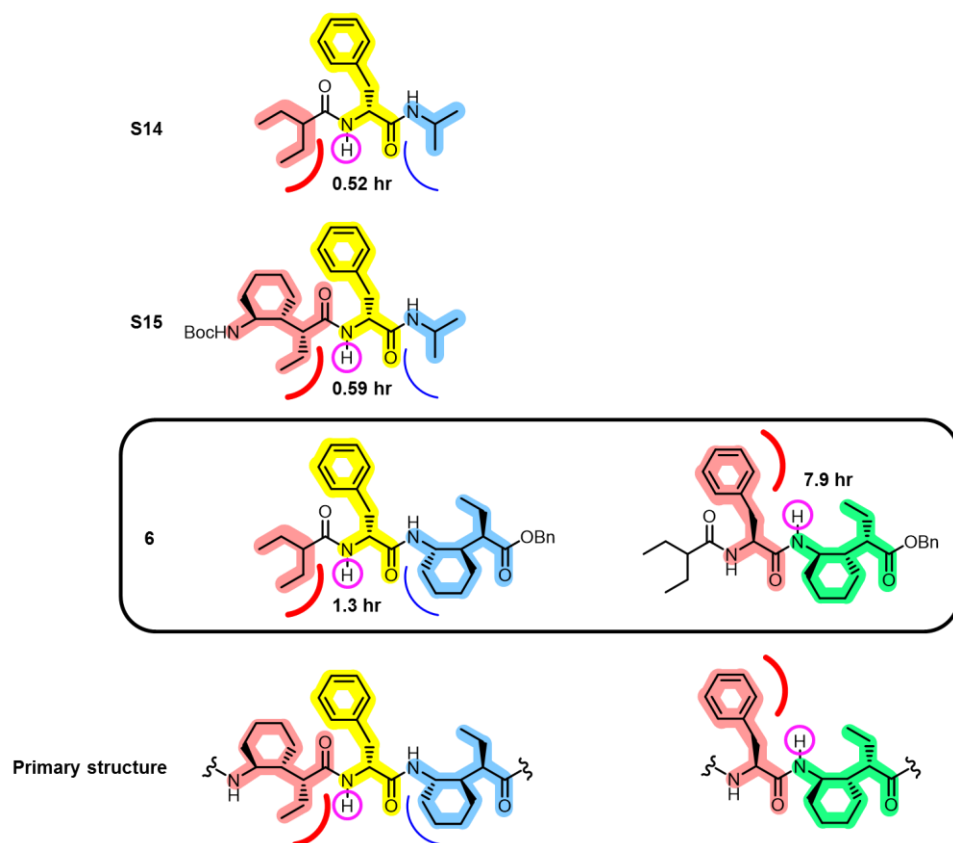

**Figure S10.** HDX model compounds. **a)** Model compounds **S14** and **S15**, used to assess 2-ethylbutyryl group as  $\gamma(\mathbf{I})$  mimic in terms of its ability to influence HDX rate of  $\text{NH}_\alpha$ . HDX half-lives are shown next to  $\text{NH}_\alpha$ . **b)** Model compound **6**, which was used as a reference for HDX experiments of full-length  $\alpha/\gamma(\mathbf{I})$ -peptides, with potential H-bond shown in light blue. HDX half-lives are shown next to their respective NH. **c)** Depiction of  $\alpha/\gamma(\mathbf{I})$ -peptide primary context of each residue relevant to influencing HDX rate.

## VII. 12/10- and 12-Helix $^1\text{H-NMR}$ Comparisons

The  $^1\text{H-NMR}$  resonance assignments of the amide protons of 12/10-helical  $\alpha/\gamma(\mathbf{I})$ -peptide foldamers reveal an interesting trend: all  $\gamma(\mathbf{I})$ -residue amide NH capable of forming 10-atom H-bonds are upfield of the  $\alpha$ -residue amide NH capable of forming 12-atom H-bonds. This is suggestive of the  $\gamma(\mathbf{I})$  NHs forming less favorable H-bonds than the  $\alpha$  NHs. Other data—crystal structures, DMSO titration, and HDX—give us some confidence in interpreting the  $^1\text{H-NMR}$  data in this way. A few questions we can next ask is: Is this trend common among  $\alpha/\gamma$ -peptides? Is this trend common only among  $\alpha/\gamma$ -peptides which adopt 12/10-helices? Or is this only observed in the 12/10-helical  $\alpha/\gamma(\mathbf{I})$ -peptides? **Table S16** shows amide chemical shift data for representative 12/10-helical  $\alpha/\gamma$ -peptides reported in the literature. Also shown, for comparison, is a 12-helical  $\alpha/\gamma$ -peptide. **Figure S11** depicts the data graphically.



**Table S16.** Amide chemical shift comparison of  $\alpha/\gamma$ -peptides

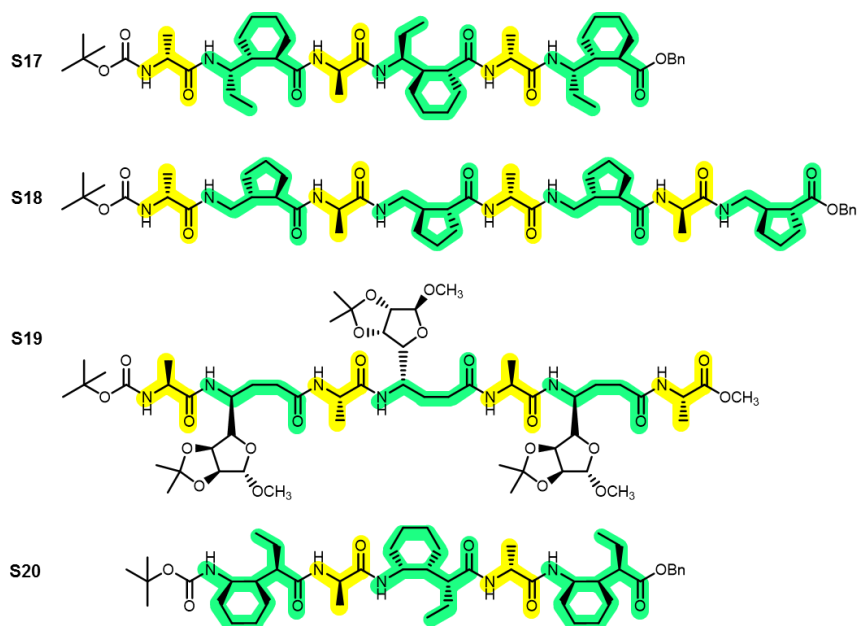

| Compound                 | $\gamma$ -Residue | Helix Type | $\delta[\alpha]1$ (ppm) | $\delta[\gamma]2$ (ppm) | $\delta[\alpha]3$ (ppm) | $\delta[\gamma]4$ (ppm) | $\delta[\alpha]5$ (ppm) | $\delta[\gamma]6$ (ppm) | $\delta[\alpha]7$ (ppm) | $\delta[\gamma]8$ (ppm) |
|--------------------------|-------------------|------------|-------------------------|-------------------------|-------------------------|-------------------------|-------------------------|-------------------------|-------------------------|-------------------------|
| <b>5</b>                 | $\gamma(I)$       | 12/10      | 5.09                    | 6.69                    | 7.77                    | 6.40                    | 8.52                    | 6.14                    | 8.20                    | 5.90                    |
| <b>S12</b>               | $\gamma(I)$       | 12/10      | 4.94                    | 7.08                    | 7.79                    | 6.78                    | 8.70                    | 6.74                    | 7.83                    | 6.09                    |
| <b>S17<sup>S19</sup></b> | APCH              | 12/10      | 4.99                    | 8.23                    | 8.60                    | 8.00                    | 8.77                    | 5.67                    | –                       | –                       |
| <b>S18<sup>S21</sup></b> | AMCP              | 12/10      | 5.11                    | 7.47                    | 7.95                    | 7.71                    | 8.72                    | 7.76                    | 8.36                    | 6.61                    |
| <b>S19<sup>S1</sup></b>  | $\gamma$ -Caa     | 12/10      | 5.21                    | 7.64                    | 8.03                    | 7.76                    | 8.57                    | 6.90                    | 8.23                    | –                       |
| <b>S20<sup>S22</sup></b> | $\gamma(II)$      | 12         | –                       | 5.08                    | 6.62                    | 7.08                    | 7.80                    | 8.15                    | 8.07                    | –                       |

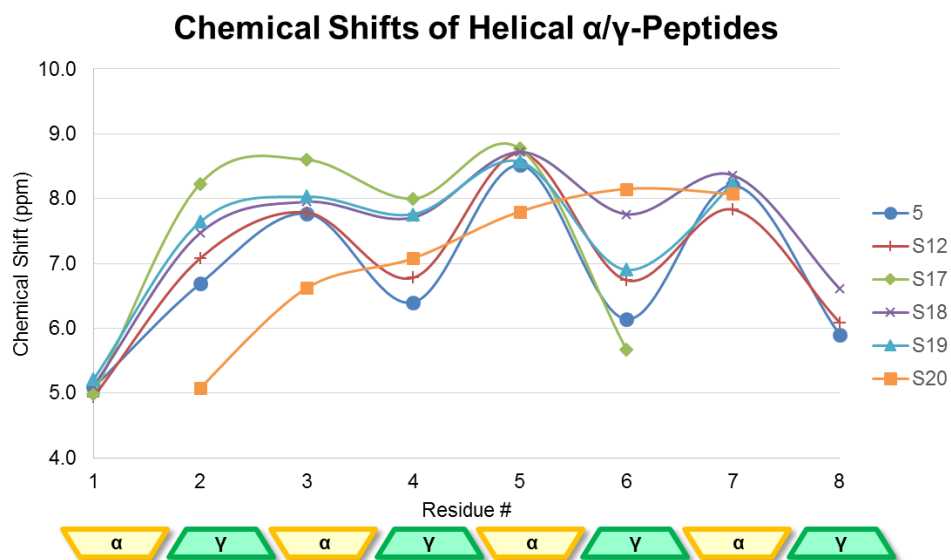

**Figure S11.** Amide chemical shift data for several 12/10- and 12-helical  $\alpha/\gamma$ -peptides. Lines connecting data points serve as a visual guide.

Immediately apparent from **Figure S11** is the aforementioned trend from the  $\alpha/\gamma(\mathbf{I})$ -peptides **5** and **S12** of high  $\alpha$ -NH chemical shift/lower  $\gamma$ -NH chemical shift. Compound **S17**, containing  $\gamma(\mathbf{III})$  which is an isomer of  $\gamma(\mathbf{I})$  with a cyclic constraint at  $C_\alpha-C_\beta$  instead of at  $C_\beta-C_\gamma$ , features highly downfield chemical shifts of all NH and a smaller difference between  $\alpha$ -NH and  $\gamma$ -NH. Compounds **S18** and **S19** behave similarly, with relatively shallow differences between  $\alpha$ -NH and  $\gamma$ -NH, although **S19** features a quite upfield  $[\gamma]6$ -NH. Foldamer **S20**, which was found to be 12-helical in solution, does not show the clear chemical shift trend of the other peptides.

The amide chemical shift trends seem to suggest four features of  $\alpha/\gamma$ -peptide 12/10-helix structure: 1)  $\alpha/\gamma$ -Peptide 12/10-helices generally feature less favorable 10-atom H-bonds donated by  $\gamma$ -NH compared with the 12-atom H-bonds donated by  $\alpha$ -NH; 2) A weaker 10-atom/stronger 12-atom H-bond trend manifests most strongly in  $\alpha/\gamma(\mathbf{I})$ -peptides; and 3) This trend becomes less distinguishable when the cyclic constraint of  $\gamma(\mathbf{I})$  at  $C_\beta-C_\gamma$  is positioned instead at  $C_\alpha-C_\beta$  by substituting  $\gamma(\mathbf{I})$  with  $\gamma(\mathbf{III})$ . The second and third claims are bolstered by the ease with which amphiprotic solvent-interpolated H-bonds appeared in  $\alpha/\gamma(\mathbf{I})$ -peptide 12/10-helix crystals and the lack of this phenomenon in the few other 12/10-helix crystals.

## VIII. Helix Structural Parameters

### Backbone torsion angle analysis

Below in **Table S16** are listed the backbone torsion angles of the seven described  $\alpha/\gamma(\mathbf{I})$ -peptide crystal structures, measured using PyMOL. L- $\alpha/(S,S,R)\gamma(\mathbf{I})$ -peptides are shown for the racemically-grown crystals, and, for ease of comparison, dihedrals of the enantiomers of crystals **1b** and **1c**, which were D- $\alpha/(R,R,S)\gamma(\mathbf{I})$ -peptides, are listed. Compound **2b** crystallized with two conformers in the asymmetric unit, which differ primarily by the benzyl ester O-CH<sub>2</sub> bond torsion angle. Torsion angles within the helical structure vary only subtly; the main text describes conformer **A**.

**Table S16.** Backbone torsion angles for  $\alpha/\gamma(\mathbf{I})$ -peptide crystal structures.<sup>a</sup>

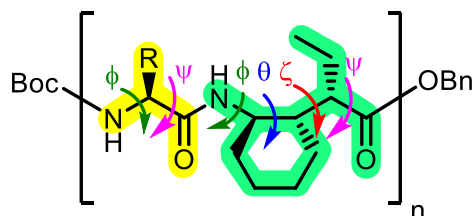

| Structure                    | Residue                 | $\phi$ | $\theta$ | $\zeta$ | $\psi$ |
|------------------------------|-------------------------|--------|----------|---------|--------|
| gellman155<br><b>L-1a</b>    | [Phe]1                  | -61.0  |          |         | 141.6  |
|                              | $[\gamma(\mathbf{I})]2$ | 131.3  | -51.4    | 107.5   | -108.7 |
|                              | [Phe]3                  | -78.2  |          |         | 148.0  |
|                              | $[\gamma(\mathbf{I})]4$ | 124.2  | -52.6    | 165.1   | 93.6   |
| gellman126<br><i>ent-1b</i>  | [Ala]1                  | -76.4  |          |         | -20.0  |
|                              | $[\gamma(\mathbf{I})]2$ | -57.0  | -52.0    | 133.5   | -103.7 |
|                              | [Ala]3                  | -69.3  |          |         | -33.7  |
|                              | $[\gamma(\mathbf{I})]4$ | 101.7  | -54.9    | 157.6   | -81.8  |
| gellman124a<br><i>ent-1c</i> | [Ala]1                  | -64.4  |          |         | 152.5  |
|                              | $[\gamma(\mathbf{I})]2$ | 99.4   | -58.9    | 150.3   | -116.0 |
|                              | [Ala]3                  | -72.7  |          |         | 124.7  |
|                              | $[\gamma(\mathbf{I})]4$ | 125.3  | -55.4    | 169.3   | -63.9  |

|               |                                                               |        |       |       |        |
|---------------|---------------------------------------------------------------|--------|-------|-------|--------|
|               | [Val]1                                                        | -60.9  |       |       | 137.6  |
|               | [ $\gamma$ (I)]2                                              | 149.5  | -50.7 | 91.0  | -122.1 |
| gellman149    | [Val]3                                                        | -55.4  |       |       | 138.6  |
| <b>2a</b>     | [ $\gamma$ (I)]4                                              | 99.3   | -61.6 | 156.4 | -104.3 |
|               | [Val]5                                                        | -136.4 |       |       | 165.0  |
|               | [Ala]1                                                        | -68.8  |       |       | 148.7  |
|               | [ $\gamma$ (I)]2                                              | 107.1  | -59.9 | 141.9 | -111.6 |
| gellman153    | [Ala]3                                                        | -69.4  |       |       | 144.0  |
| <b>2b (A)</b> | [ $\gamma$ (I)]4                                              | 99.6   | -62.6 | 154.2 | -110.6 |
|               | [Ala]5                                                        | -69.8  |       |       | 162.4  |
|               | [Ala]1                                                        | -67.1  |       |       | 148.2  |
|               | [ $\gamma$ (I)]2                                              | 109.6  | -60.6 | 141.2 | -107.5 |
| gellman153    | [Ala]3                                                        | -62.8  |       |       | 146.8  |
| <b>2b (B)</b> | [ $\gamma$ (I)]4                                              | 97.9   | -58.5 | 150.4 | -115.3 |
|               | [Ala]5                                                        | -70.8  |       |       | 156.1  |
|               | [Phe]1                                                        | -55.2  |       |       | 136.2  |
|               | [ $\gamma$ (I)]2                                              | 140.5  | -45.7 | 87.6  | -124.7 |
| gellman157    | [Phe]3                                                        | -54.9  |       |       | 144.7  |
| <b>L-3a</b>   | [ $\gamma$ (I)]4                                              | 126.2  | -57.2 | 119.8 | -114.1 |
|               | [Phe]5                                                        | -104.6 |       |       | 137.5  |
|               | [ $\gamma$ (I)]6                                              | 123.5  | -51.2 | 176.5 | -59.9  |
|               | [Phe]1                                                        | -63.9  |       |       | 144.1  |
|               | [ $\gamma$ (I)]2                                              | 139.5  | -50.3 | 96.8  | -116.6 |
| gellman156    | [Phe]3                                                        | -60.8  |       |       | 148.0  |
| <b>L-3b</b>   | [ $\gamma$ (I)]4                                              | 116.3  | -62.9 | 141.1 | -110.2 |
|               | [Phe]5                                                        | -79.4  |       |       | 129.1  |
|               | [ $\gamma$ (I)]6                                              | 127.4  | -50.0 | 178.7 | 115.3  |
|               | <b><math>\alpha</math> Median</b>                             | -68.8  |       |       | 144.1  |
|               | <b><math>\alpha</math> Std Dev</b>                            | 18.4   |       |       | 52.6   |
|               | <b><math>\alpha</math> 12/10-Helix<sup>a</sup> Median</b>     | -61.9  |       |       | 144.4  |
|               | <b><math>\alpha</math> 12/10-Helix<sup>a</sup> Std Dev</b>    | 6.9    |       |       | 4.4    |
|               | <b><math>\gamma</math>(I) Median</b>                          | 119.9  | -55.2 | 146.1 | -109.4 |
|               | <b><math>\gamma</math>(I) Std Dev</b>                         | 43.1   | 5.1   | 27.7  | 68.4   |
|               | <b><math>\gamma</math>(I) 12/10-Helix<sup>a</sup> Median</b>  | 121.2  | -57.8 | 130.4 | -112.8 |
|               | <b><math>\gamma</math>(I) 12/10-Helix<sup>a</sup> Std Dev</b> | 18.6   | 5.9   | 26.4  | 6.2    |

<sup>a</sup>This dihedral is: 1) present in a 12/10-helical crystal structure, and 2) not a C-terminal residue.

A few trends can be identified from analyzing the torsion angles in the crystal structures. First, C-terminal residues of 12/10-helical foldamers adopt more varied torsions than the residues at the N-terminus or internal in the sequence. This may reflect either the better ability of these residues to adopt their more highly preferred torsion angles or the perturbation required to form intermolecular H-bonds with lattice neighbors.

The most intriguing find of the crystal structure set is the unusual ambivalence these foldamers appear to display in formation of the 10-atom H-bond. With that in mind, an important question to ask is: Which torsions distinguish “closed” 10-atom H-bonds—those that form intramolecular 10-atom H-bonds fitting conventional geometric criteria—from those within “opened” 10-atom H-bonds—those that are able to form 10-atom H-bonds, but do not?

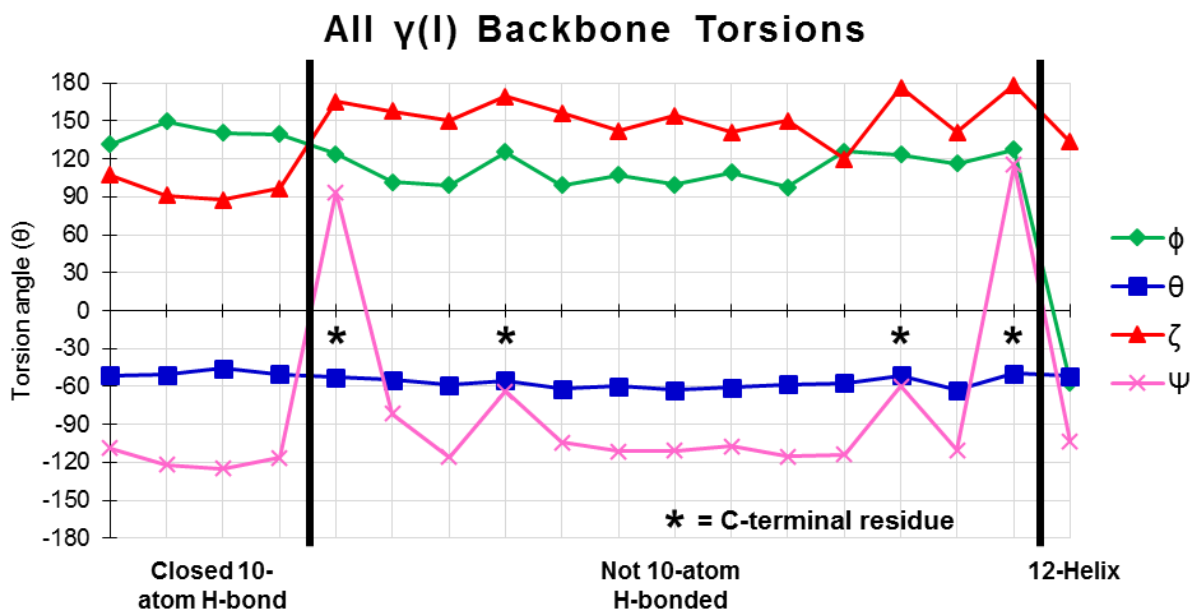

**Figure S12.** Torsion angles adopted by  $\gamma(\mathbf{I})$  residues in crystal structures reported in the main text. Torsion angles of the enantiomers of **1b** and **1c** are shown. Each value on the x-axis represents a different  $\gamma(\mathbf{I})$  residue. Residues with torsion angles within a closed 10-atom H-bonds are shown at the left, followed after the vertical bar by residues with torsion angles not within 10-atom H-bonds (this includes solvent-bridged, poor H-bond geometry, intermolecularly H-bonded, or not H-bonded), followed by the one 12-helical residue in tetramer **1b**. Asterisks signify  $\gamma(\mathbf{I})$  residues at the C-terminus, which cannot form 10-atom H-bonds.

The 12/10-helix  $\alpha$  residue torsion angles cluster relatively tightly around  $[\phi, \psi] = [-62, 144]$ , in the  $\beta$  region of the Ramachandran plot. These torsions do not vary much between among  $\alpha$  residues with torsions within closed or within opened 10-atom H-bonds. Most interesting are the  $\gamma(\mathbf{I})$  torsion angles (**Figure S12**). Expectedly,  $\theta$ , the torsion angle about the constrained  $C_{\beta}-C_{\gamma}$  backbone cyclohexyl bond, does not vary much no matter the structural context of the residue. Torsion  $\psi$  in  $\gamma(\mathbf{I})$  residues also adopts similar values in all structures, excluding the C-terminal residues in which  $\psi$  defines the torsion angle about the  $C_{\alpha}-C_{CO}$ , the definition of which includes the ester oxygen atom.

The torsion angles  $\phi$  about the  $N-C_{\gamma}$  bond and  $\zeta$  about the  $C_{\alpha}-C_{\beta}$  bond differ the most between the  $\gamma(\mathbf{I})$  residues within a closed 10-atom H-bond and those within an opened H-bond. **Figure S13** below depicts how these torsions result in differing structures, focusing here on **3b** which contains both a closed 10-atom H-bond and an opened 10-atom H-bond. The  $\phi$  of the  $\gamma(\mathbf{I})$  residue within the closed 10-atom H-bond ( $140.5^{\circ}$ ) is greater than the  $\phi$  of the  $\gamma(\mathbf{I})$  within the opened 10-atom H-bond ( $126.2^{\circ}$ ), and the  $\zeta$  within the closed 10-atom H-bond ( $87.6^{\circ}$ ) is smaller than the  $\zeta$  of the opened 10-atom H-bond ( $119.8^{\circ}$ ). The summed effect of these two torsional shifts is to reposition the 10-atom H-bond acceptor carbonyl oxygen atom farther from the amide H-bond donor hydrogen atom. Notably, the  $\gamma(\mathbf{I})$  residue within this opened 10-atom H-bond is also within a closed 12-atom H-bond. The torsion perturbation resulting in the opening of the 10-atom H-bond thus does not result in disruption of the 12-atom H-bond.

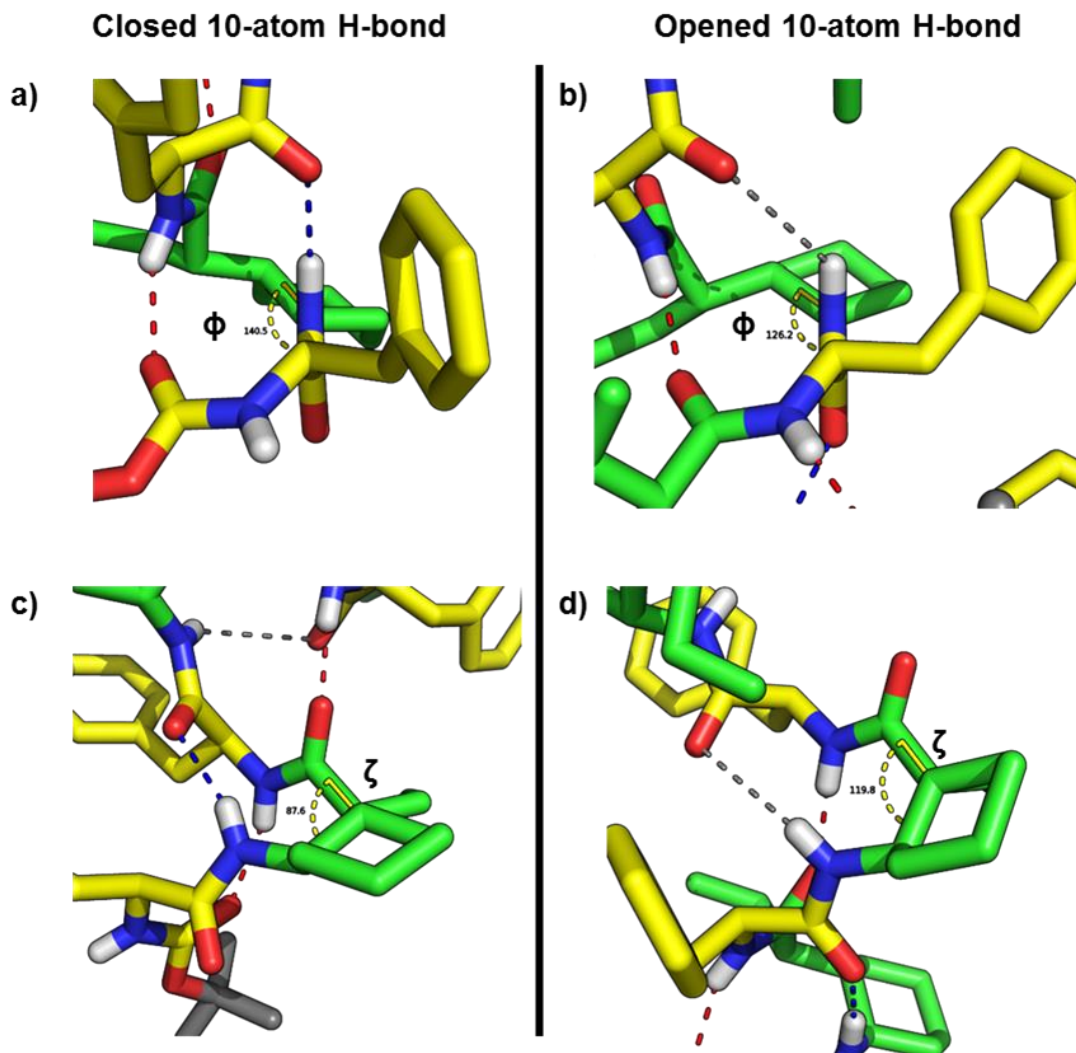

**Figure S13.** Comparison of torsion angles  $\phi$  and  $\zeta$  within structure **3b**. Top: comparison of typical  $\phi$  for **a)** 12/10-helical  $\gamma(\mathbf{I})$  of 140.5° and **b)** non-12/10-helical  $\gamma(\mathbf{I})$  of 126.2°. Bottom: comparison of typical  $\zeta$  for **c)** 12/10-helical  $\gamma(\mathbf{I})$  of 87.6° and **d)** non-12/10-helical  $\gamma(\mathbf{I})$  of 119.8°. The closed 10-atom H-bond is depicted with blue dashes, and the opened 10-atom H-bond is depicted with gray dashes. Note the closed 12-atom H-bond in red, formed in both structures.

## H-Bond Parameters

**Table S17** lists the H-bond distances and angles derived from the crystal structure data. H-bond donors and acceptors are listed as (Xxx,y) where Xxx = residue type of the donor/acceptor and Y = position in the sequence of the donor/acceptor (Boc = position 0). H-bond distances are listed as the donor-acceptor distance (D···A). Bond angles were measured with uncorrected polar hydrogen atom positions. H-bond size is undefined for intermolecular H-bonds, and angle C=O···H is undefined for non-carbonyl H-bond acceptors. The two conformers of compound **2b** feature slightly different geometric H-bond parameters for the C-terminal 12-atom H-bond, although both foldamers had an EtOH molecule in the same position. Conformer **A** is discussed in the main text.

**Table S17. Intramolecular H-Bond Parameters for Crystal Structures**

| Compound      | H-Bond Type                       | H-Bond Size             | D···A (Å) | C=O···H (°) | A···H-D (°) |
|---------------|-----------------------------------|-------------------------|-----------|-------------|-------------|
| <b>1a</b>     | C=O(Boc,0)→HN(Phe,3)              | 12-atom                 | 2.83      | 144.2       | 170.4       |
|               | C=O(Phe,3)→HN( $\gamma$ ,2)       | 10-atom                 | 3.00      | 127.7       | 171.3       |
| <b>1b</b>     | C=O(Boc,0)→HN(Ala,3)              | 12-atom                 | 3.06      | 134.7       | 162.6       |
|               | C=O(Ala,1)→HN( $\gamma$ ,4)       | 12-atom                 | 3.00      | 127.9       | 161.2       |
| <b>1c</b>     | C=O(Boc,0)→HN(Ala,3)              | 12-atom                 | 3.10      | 158.4       | 170.3       |
|               | C=O(Ala,3')→HN( $\gamma$ ,2)      | –                       | 2.91      | 142.5       | 177.3       |
|               | C=O(Ala,3)→HOH                    | –                       | 2.86      | 123.8       | 162.1       |
| <b>2a</b>     | C=O(Boc,0)→HN(Val,3)              | 12-atom                 | 3.02      | 144.0       | 168.2       |
|               | C=O(Val,3)→HN( $\gamma$ ,2)       | 10-atom                 | 3.15      | 121.4       | 163.6       |
|               | C=O( $\gamma$ ,2)→HN(Val,5)       | 12-atom                 | 3.11      | 156.5       | 164.1       |
| <b>2b (A)</b> | C=O( $\gamma$ ,i)→HN(Ala,i+3)     | 12-atom                 | 2.91      | 166.0       | 165.8       |
|               | EtHO→HN( $\gamma$ ,2)             | –                       | 2.95      | –           | 148.0       |
|               | C=O(Ala,3)→HOEt                   | –                       | 2.73      | 132.7       | 160.2       |
|               | C=O( $\gamma$ ,2)→HN(Ala,5)       | 12-atom                 | 2.95      | 158.6       | 173.1       |
| <b>2b (B)</b> | C=O( $\gamma$ ,i)→HN(Ala,i+3)     | 12-atom                 | 2.93      | 160.7       | 167.5       |
|               | EtHO→HN( $\gamma$ ,2)             | –                       | 2.89      | –           | 145.1       |
|               | C=O(Ala,3)→HOEt                   | –                       | 2.70      | 138.4       | 166.8       |
|               | C=O( $\gamma$ ,2)→HN(Ala,5)       | 12-atom                 | 2.98      | 144.8       | 154.4       |
| <b>3a</b>     | C=O(Boc,0)→HN(Phe,3)              | 12-atom                 | 2.86      | 145.2       | 155.5       |
|               | C=O(Phe,3)→HN( $\gamma$ ,2)       | 10-atom                 | 3.02      | 126.5       | 162.6       |
|               | C=O(2,i)→HN(Phe,5)                | 12-atom                 | 2.85      | 149.9       | 171.9       |
|               | C=O(Phe,5)→HN( $\gamma$ ,4)       | 10-atom                 | 4.09      | 110.1       | 135.0       |
| <b>3b</b>     | C=O(Boc,0)→HN(Phe,3)              | 12-atom                 | 2.92      | 149.4       | 159.4       |
|               | C=O(Phe,3)→HN( $\gamma$ ,2)       | 10-atom                 | 2.99      | 129.9       | 169.7       |
|               | C=O( $\gamma$ ,2)→HN(Phe,5)       | 12-atom                 | 2.90      | 172.4       | 167.3       |
|               | H <sub>2</sub> O→HN( $\gamma$ ,4) | –                       | 2.86      | –           | 156.2       |
|               | C=O(Phe,5)→HOH                    | –                       | 2.78      | 129.7       | 158.9       |
|               |                                   | <b>10-atom averages</b> | 3.04      | 126.4       | 166.8       |
|               |                                   | <b>12-atom averages</b> | 2.96      | 1150.9      | 165.1       |

<sup>a</sup>Although parameters are listed here, these atoms do not fit conventional geometric criteria for a hydrogen bonding interaction and are not included in averages.

## 12/10-Helix Parameters

Below in **Table S18** are shown the helix parameters of  $\alpha/\gamma$ (I)-peptide 12/10-helices calculated via reported methods.<sup>S23</sup> All helix parameter values for the 12/10-helix are very close to those of the 12-helix, although the 12/10-helix appears to be slightly narrower in radius. The 12/10- and 12-helices are geometrically very similar despite the difference in H-bonding directionality.

**Table S18.** Helix parameters for select peptide helix types and for  $\alpha/\gamma$ -peptide 12/10-helices

| Backbone             | Peptide                | Helix type                            | res/turn   | rise/turn (Å) | rise/res (Å) | radius (Å) |
|----------------------|------------------------|---------------------------------------|------------|---------------|--------------|------------|
| $\alpha$             |                        | $\alpha$ -helix <sup>S24</sup>        | 3.5        | 5.4           | 1.5          | 2.3        |
| $\alpha$             |                        | 3 <sub>10</sub> -helix <sup>S24</sup> | 3.2        | 5.8           | 1.8          | 2.0        |
| $\gamma$             | <b>EtACHA</b>          | 14-helix <sup>S25</sup>               | 2.5        | 5.5           | 2.1          | 2.9        |
| $\alpha/\gamma$      | <b>Ala/EtACHA 6mer</b> | 12-helix <sup>S1,a</sup>              | 2.7        | 5.5           | 2.1          | 2.3        |
| $\alpha/\gamma$      | <b>1a</b>              | 12/10                                 | 2.7        | 5.8           | 2.1          | 2.2        |
| $\alpha/\gamma$      | <b>2a</b>              | 12/10                                 | 2.6        | 5.4           | 2.0          | 2.2        |
| $\alpha/\gamma$      | <b>2b</b>              | 12/10                                 | 2.4        | 5.5           | 2.3          | 1.8        |
| $\alpha/\gamma$      | <b>3a</b>              | 12/10                                 | 2.6        | 5.5           | 2.1          | 2.2        |
| $\alpha/\gamma$      | <b>3b</b>              | 12/10                                 | 2.6        | 5.5           | 2.1          | 2.1        |
| $\alpha/\gamma$      | <b>Ala/APCH 4mer</b>   | 12/10                                 | 2.5        | 5.3           | 2.1          | 1.8        |
| <b>12/10-Average</b> |                        |                                       | <b>2.6</b> | <b>5.5</b>    | <b>2.1</b>   | <b>2.1</b> |

<sup>a</sup>Recalculated from ref. using C <sub>$\beta$</sub> (EtACHA) instead of C <sub>$\alpha$</sub> (EtACHA) as points to define the helix.

## IX. SI References

**Note:** Crystallographic section contains a separate set of references.

- S1. Guo, L.; Chi, Y.; Almeida, A. M.; Guzei, I. A.; Parker, B. K.; Gellman, S. H., *J. Am. Chem. Soc.* **2009**, *131*, 16018.
- S2. Hu, D. X.; Grice, P.; Ley, S. V., *J. Org. Chem.* **2012**, *77*, 5198.
- S3. Parella, T., Pulse Program Catalogue, NMRGuide 4.0. GmbH, B. B., Ed. 2004.
- S4. Goddard, T. D.; Kneller, D. G. *Sparky 3*, University of California, San Francisco.
- S5. Wüthrich, K.; Wider, G.; Wagner, G.; Braun, W., *J. Mol. Biol.* **1982**, *155*, 311.
- S6. Neuhaus, D.; Williamson, M. P., *The Nuclear Overhauser Effect in Structural and Conformational Analysis*; Wiley-VCH: New York, 2000.
- S7. Hanwell, M. D.; Curtis, D. E.; Lonie, D. C.; Vandermeersch, T.; Zurek, E.; Hutchison, G. R., *J. Cheminform.* **2012**, *4*, 17.
- S8. Baldauf, C.; Gunther, R.; Hofmann, H. J., *Biopolymers* **2006**, *84*, 408.
- S9. Frisch, M. J.; Trucks, G. W.; Schlegel, H. B.; Scuseria, G. E.; Robb, M. A.; Cheeseman, J. R.; Scalmani, G.; Barone, V.; Mennucci, B.; Petersson, G. A.; Nakatsuji, H.; Caricato, M.; Li, X.; Hratchian, H. P.; Izmaylov, A. F.; Bloino, J.; Zheng, G.; Sonnenberg, J. L.; Hada, M.; Ehara, M.; Toyota, K.; Fukuda, R.; Hasegawa, J.; Ishida, M.; Nakajima, T.; Honda, Y.; Kitao, O.; Nakai, H.; Vreven, T.; Montgomery Jr., J. A.; Peralta, J. E.; Ogliaro, F.; Bearpark, M. J.; Heyd, J.; Brothers, E. N.; Kudin, K. N.; Staroverov, V. N.; Kobayashi, R.; Normand, J.; Raghavachari, K.; Rendell, A. P.; Burant, J. C.; Iyengar, S. S.; Tomasi, J.; Cossi, M.; Rega, N.; Millam, N. J.; Klene, M.; Knox, J. E.; Cross, J. B.; Bakken, V.; Adamo, C.; Jaramillo, J.; Gomperts, R.; Stratmann, R. E.; Yazyev, O.; Austin, A. J.;

- Cammi, R.; Pomelli, C.; Ochterski, J. W.; Martin, R. L.; Morokuma, K.; Zakrzewski, V. G.; Voth, G. A.; Salvador, P.; Dannenberg, J. J.; Dapprich, S.; Daniels, A. D.; Farkas, Ö.; Foresman, J. B.; Ortiz, J. V.; Cioslowski, J.; Fox, D. J. *Gaussian 09*, Gaussian, Inc.: Wallingford, CT, USA, 2009.
- S10. Schmidt, J. R.; Polik, W. F. *WebMO, version 15.0.002e*, WebMO LLC: Holland, MI, 2011.
- S11. *The PyMOL Molecular Graphics System, Version 1.7.0.3*, 1.7.0.3; Schrödinger, LLC.
- S12. Bolin, K. A.; Millhauser, G. L., *Acc. Chem. Res.* **1999**, *32*, 1027.
- S13. Legrand, B.; André, C.; Moulat, L.; Wenger, E.; Didierjean, C.; Aubert, E.; Averlant-Petit, M. C.; Martinez, J.; Calmes, M.; Amblard, M., *Angew. Chem., Int. Ed.* **2014**, *53*, 13131.
- S14. Choi, S. H.; Guzei, I. A.; Spencer, L. C.; Gellman, S. H., *J. Am. Chem. Soc.* **2008**, *130*, 6544.
- S15. (a) Brünger, A. T.; Adams, P. D.; Clore, G. M.; DeLano, W. L.; Gros, P.; Grosse-Kunstleve, R. W.; Jiang, J. S.; Kuszewski, J.; Nilges, M.; Pannu, N. S.; Read, R. J.; Rice, L. M.; Simonson, T.; Warren, G. L., *Acta Crystallogr. D Biol. Crystallogr.* **1998**, *54*, 905; (b) Brünger, A. T., *Nat. Protoc.* **2007**, *2*, 2728.
- S16. Schüttelkopf, A. W.; van Aalten, D. M., *Acta Crystallogr. D Biol. Crystallogr.* **2004**, *60*, 1355.
- S17. Sousa da Silva, A. W.; Vranken, W. F., *BMC Res. Notes* **2012**, *5*, 367.
- S18. Case, D. A.; Babin, V.; Berryman, J. T.; Betz, R. M.; Cai, Q.; Cerutti, D. S.; Chetham, I., T.E.; Darden, T. A.; Duke, R. E.; Gohlke, H.; Goetz, A. W.; Gusarov, S.; Homeyer, N.; Janowski, P.; Kaus, J.; Kolossváry, I.; Kovalenko, A.; Lee, T. S.; LeGrand, S.; Luchko, T.; Luo, R.; Madej, B.; Merz, K. M.; Paesani, F.; Roe, D. R.; Roitberg, A.; Sagui, C.; Salomon-Ferrer, R.; Seabra, G.; Simmerling, C. L.; Smith, W.; Swails, J.; Walker, R. C.; Wang, J.; Wolf, R. M.; Wu, X.; Kollman, P. A. *AMBER 14*, University of California, San Francisco: 2014.
- S19. Giuliano, M. W.; Maynard, S. J.; Almeida, A. M.; Guo, L.; Guzei, I. A.; Spencer, L. C.; Gellman, S. H., *J. Am. Chem. Soc.* **2014**, *136*, 15046.
- S20. March, D. R.; Proctor, L. M.; Stoermer, M. J.; Sbaglia, R.; Abbenante, G.; Reid, R. C.; Woodruff, T. M.; Wadi, K.; Paczkowski, N.; Tyndall, J. D.; Taylor, S. M.; Fairlie, D. P., *Mol. Pharmacol.* **2004**, *65*, 868.
- S21. Giuliano, M. W.; Maynard, S. J.; Almeida, A. M.; Reidenbach, A. G.; Guo, L.; Ulrich, E. C.; Guzei, I. A.; Gellman, S. H., *J. Org. Chem.* **2013**, *78*, 12351.
- S22. Sharma, G. V.; Jadhav, V. B.; Ramakrishna, K. V.; Jayaprakash, P.; Narsimulu, K.; Subash, V.; Kunwar, A. C., *J. Am. Chem. Soc.* **2006**, *128*, 14657.
- S23. Kahn, P. C., *Comput. Chem.* **1989**, *13*, 185.
- S24. Barlow, D. J.; Thornton, J. M., *J. Mol. Biol.* **1988**, *201*, 601.
- S25. Guo, L.; Zhang, W.; Reidenbach, A. G.; Giuliano, M. W.; Guzei, I. A.; Spencer, L. C.; Gellman, S. H., *Angew. Chem., Int. Ed.* **2011**, *50*, 5843.



# X. NMR Spectra

## a. $^1\text{H}$ -NMR Spectra

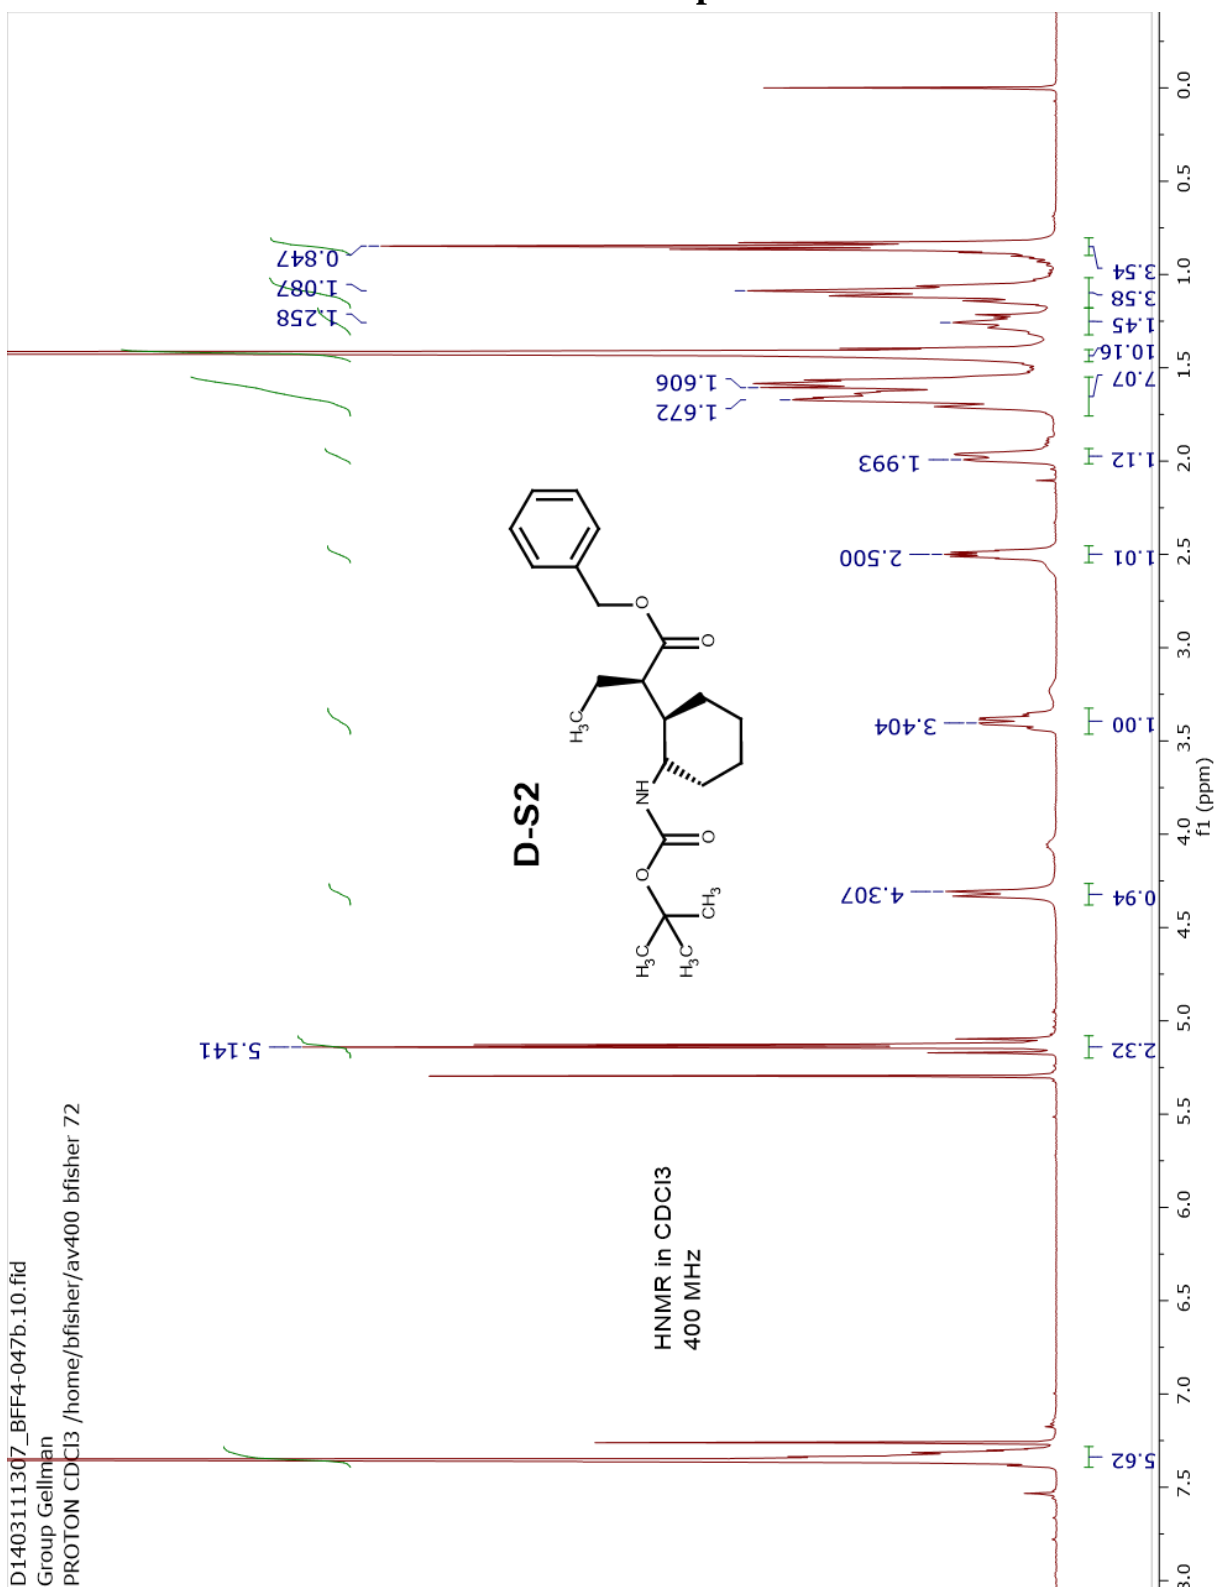

C1403101926\_BFF4-050.10.fid

Group Gellman

PROTON CDC13 /home/bfisher/callisto/bfisher.13

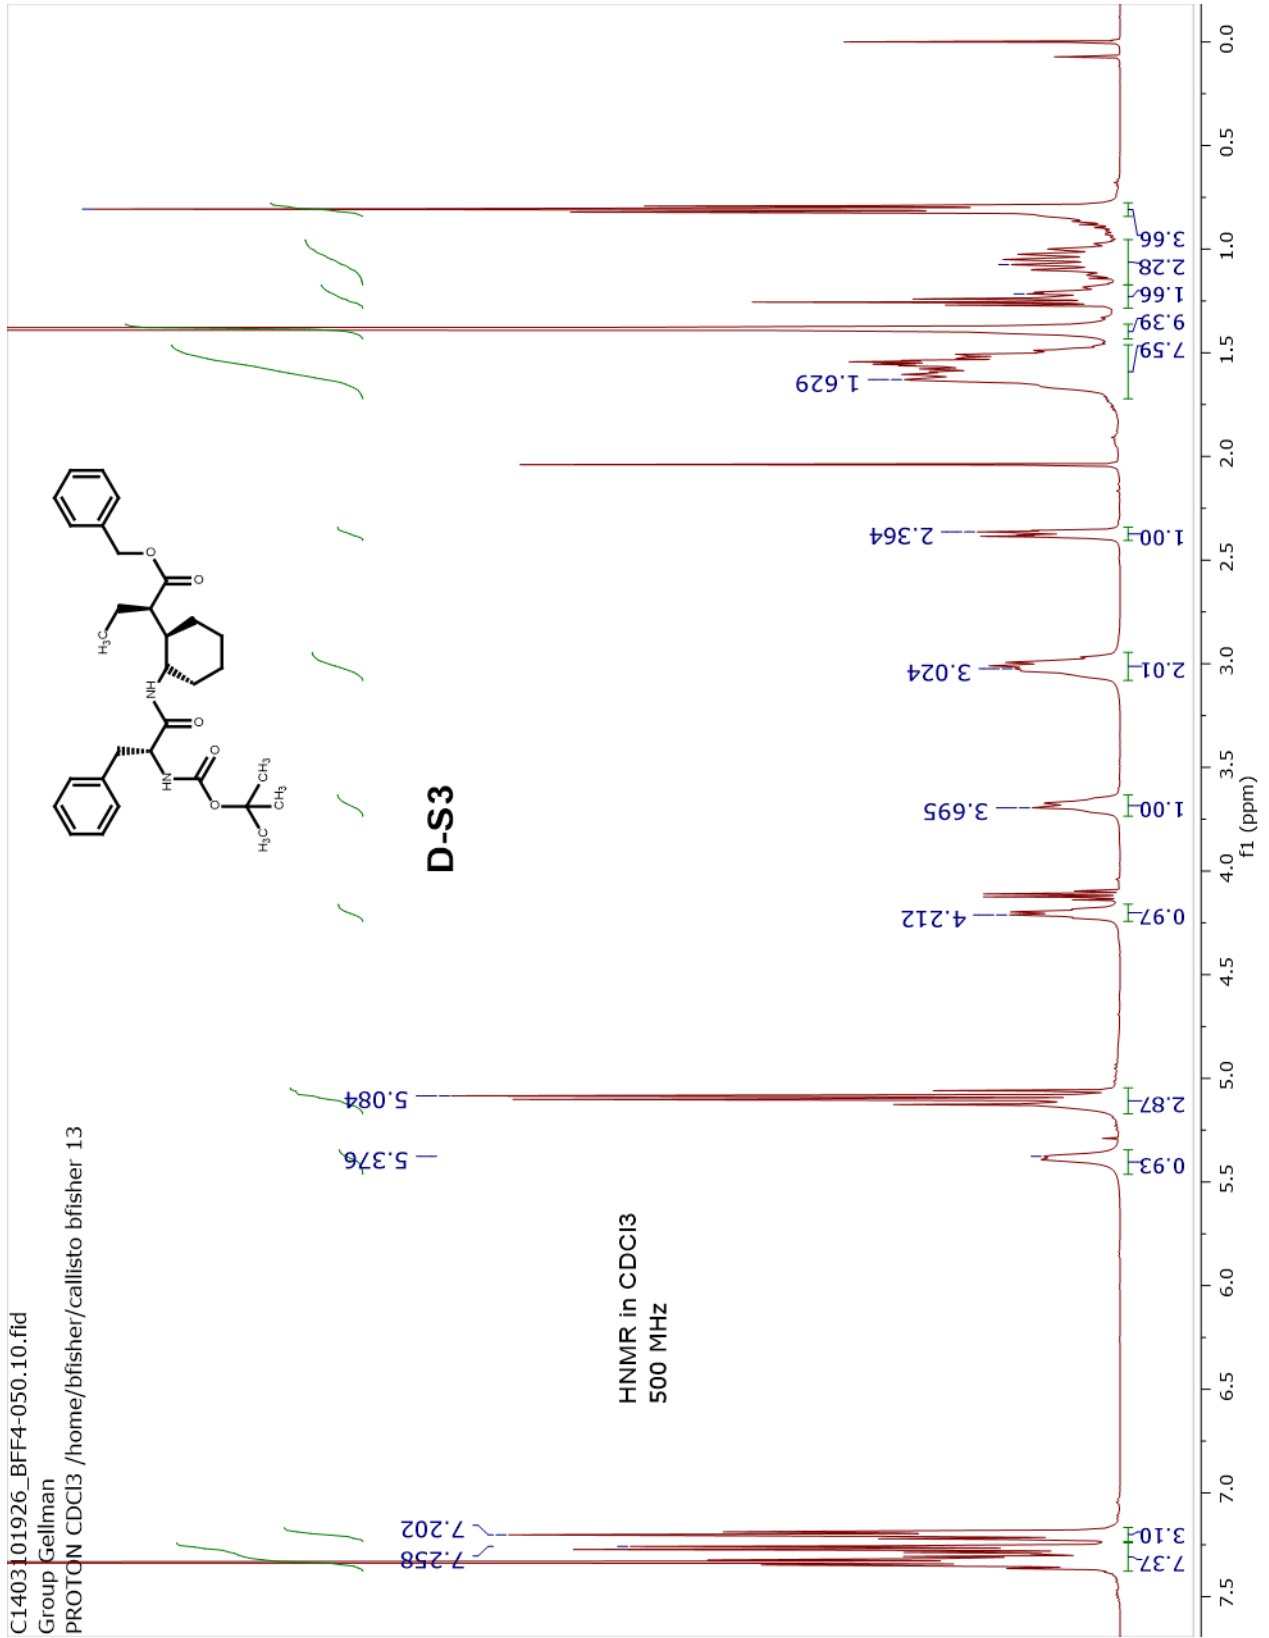

C130722219\_BFF3-147.10.fid  
Group Gellman  
PROTON CDCl3 /home/bfisher/callisto/bfisher 59

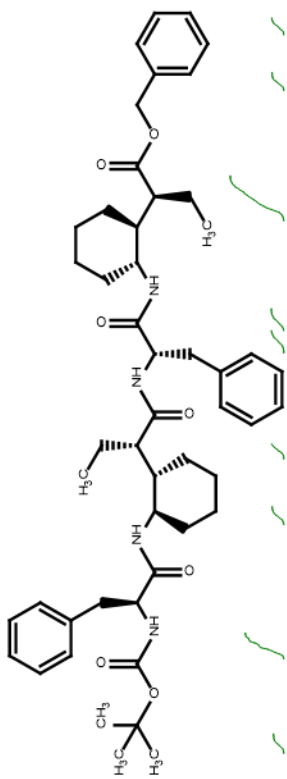

HNMR in CDCl3  
500 MHz

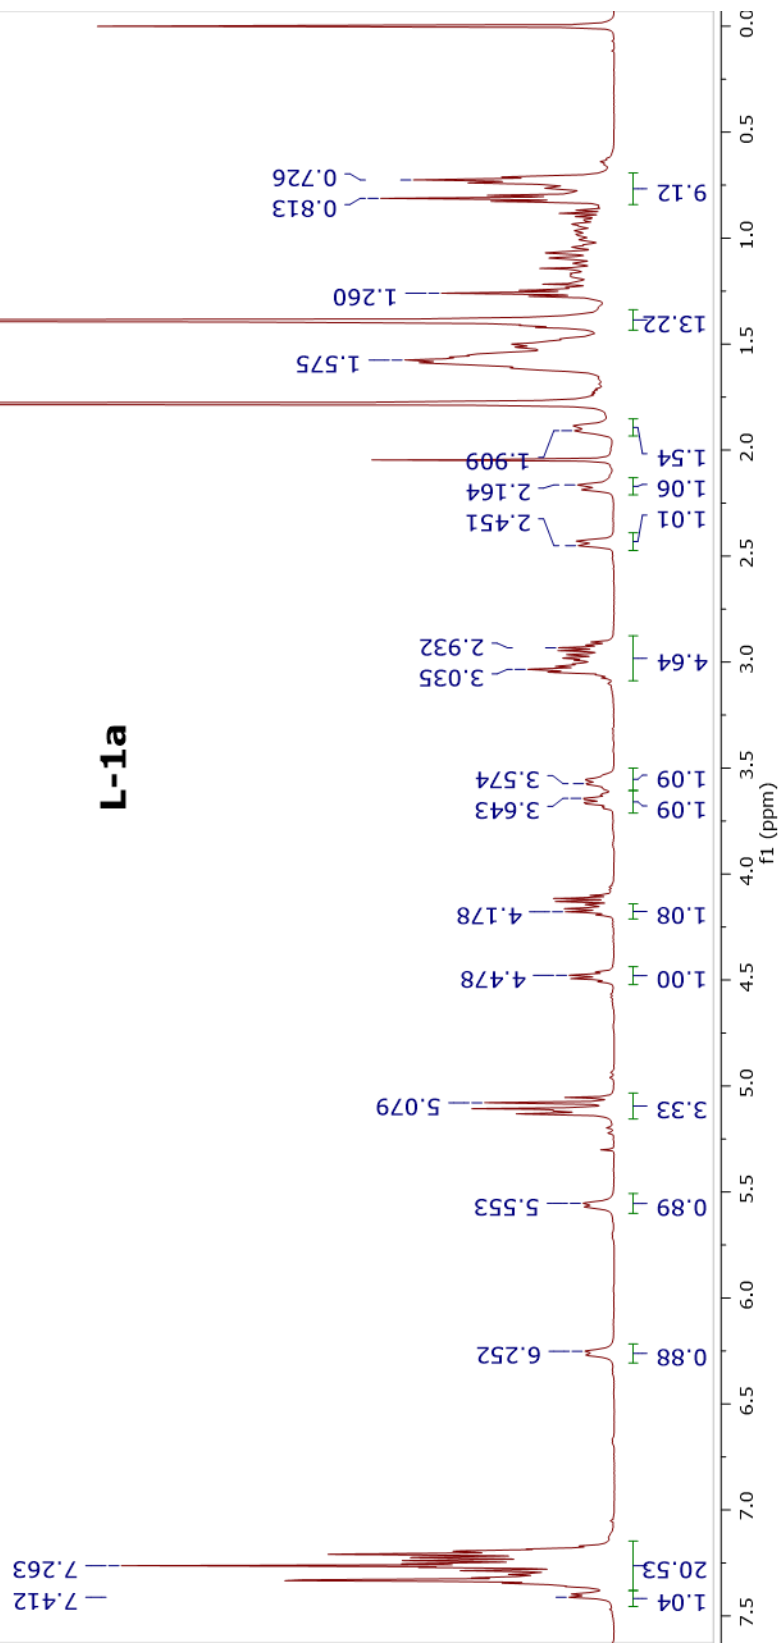

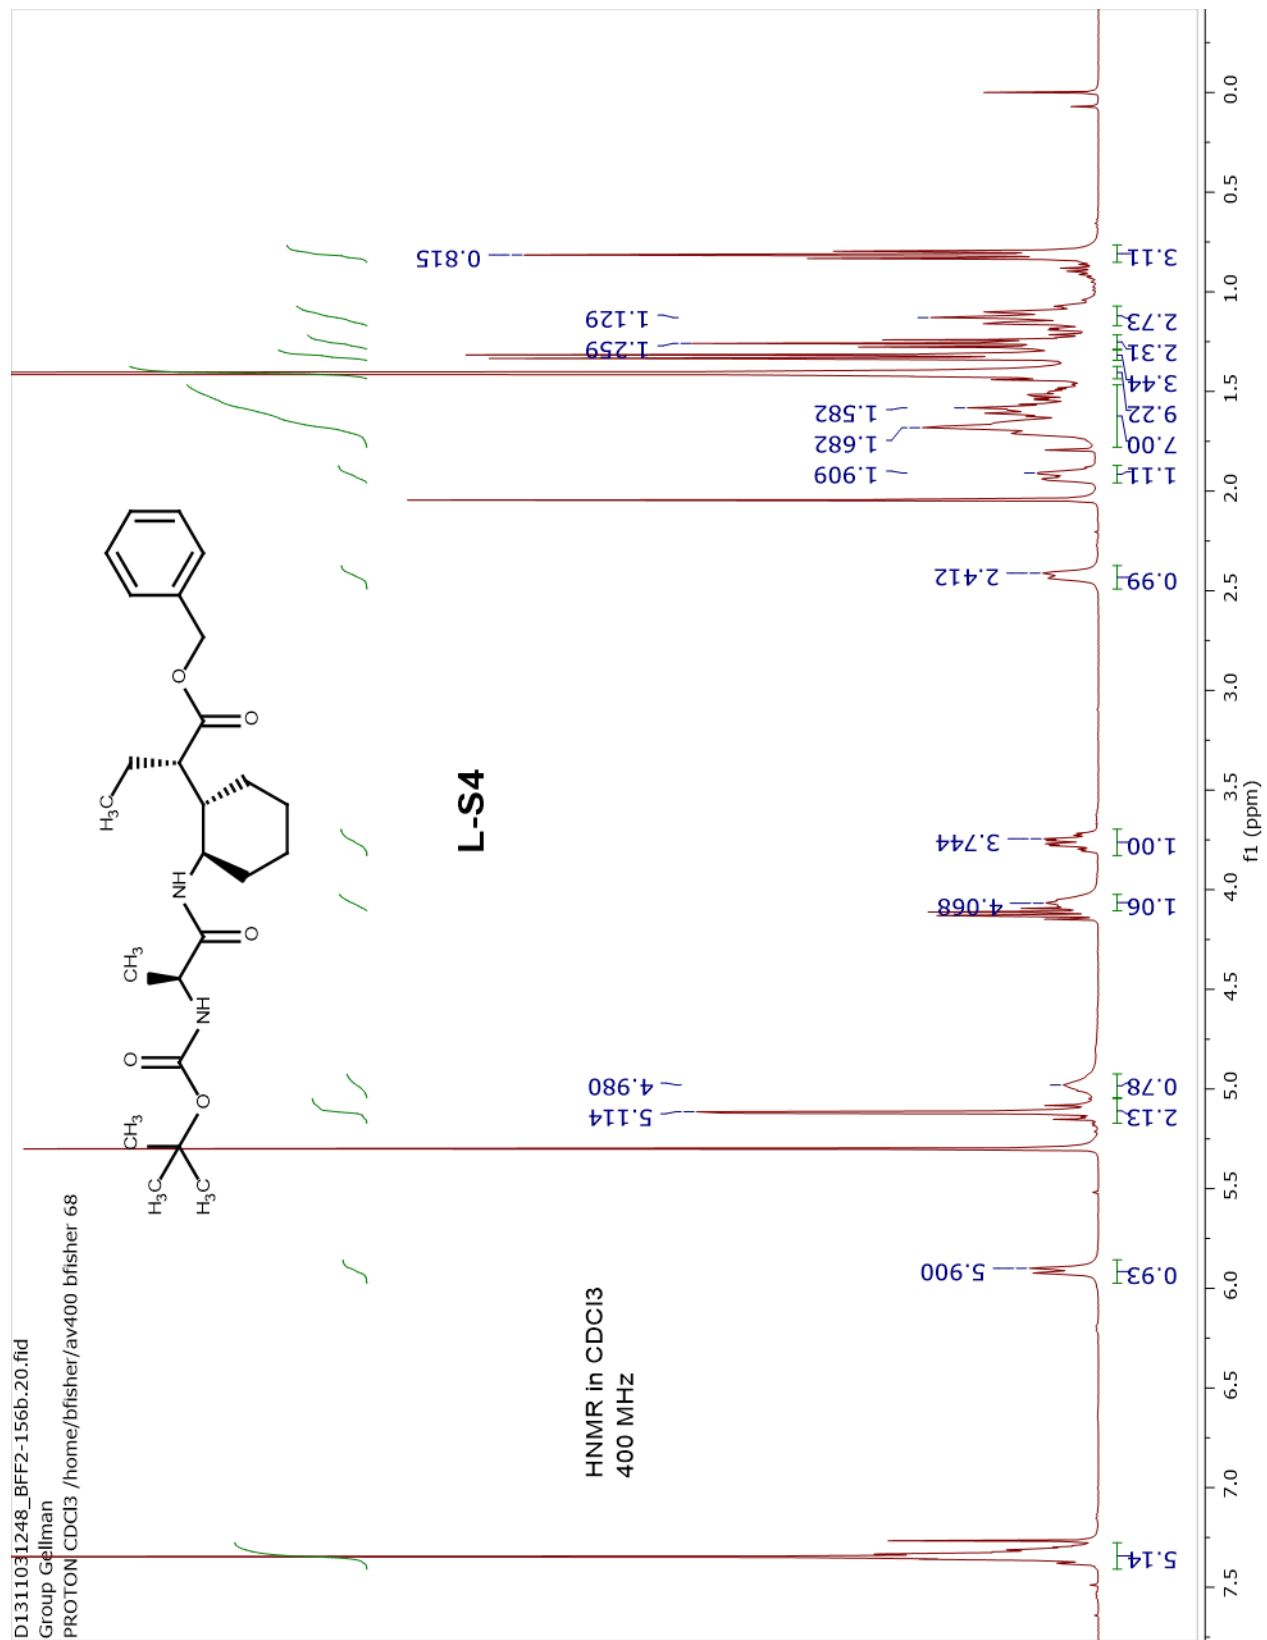

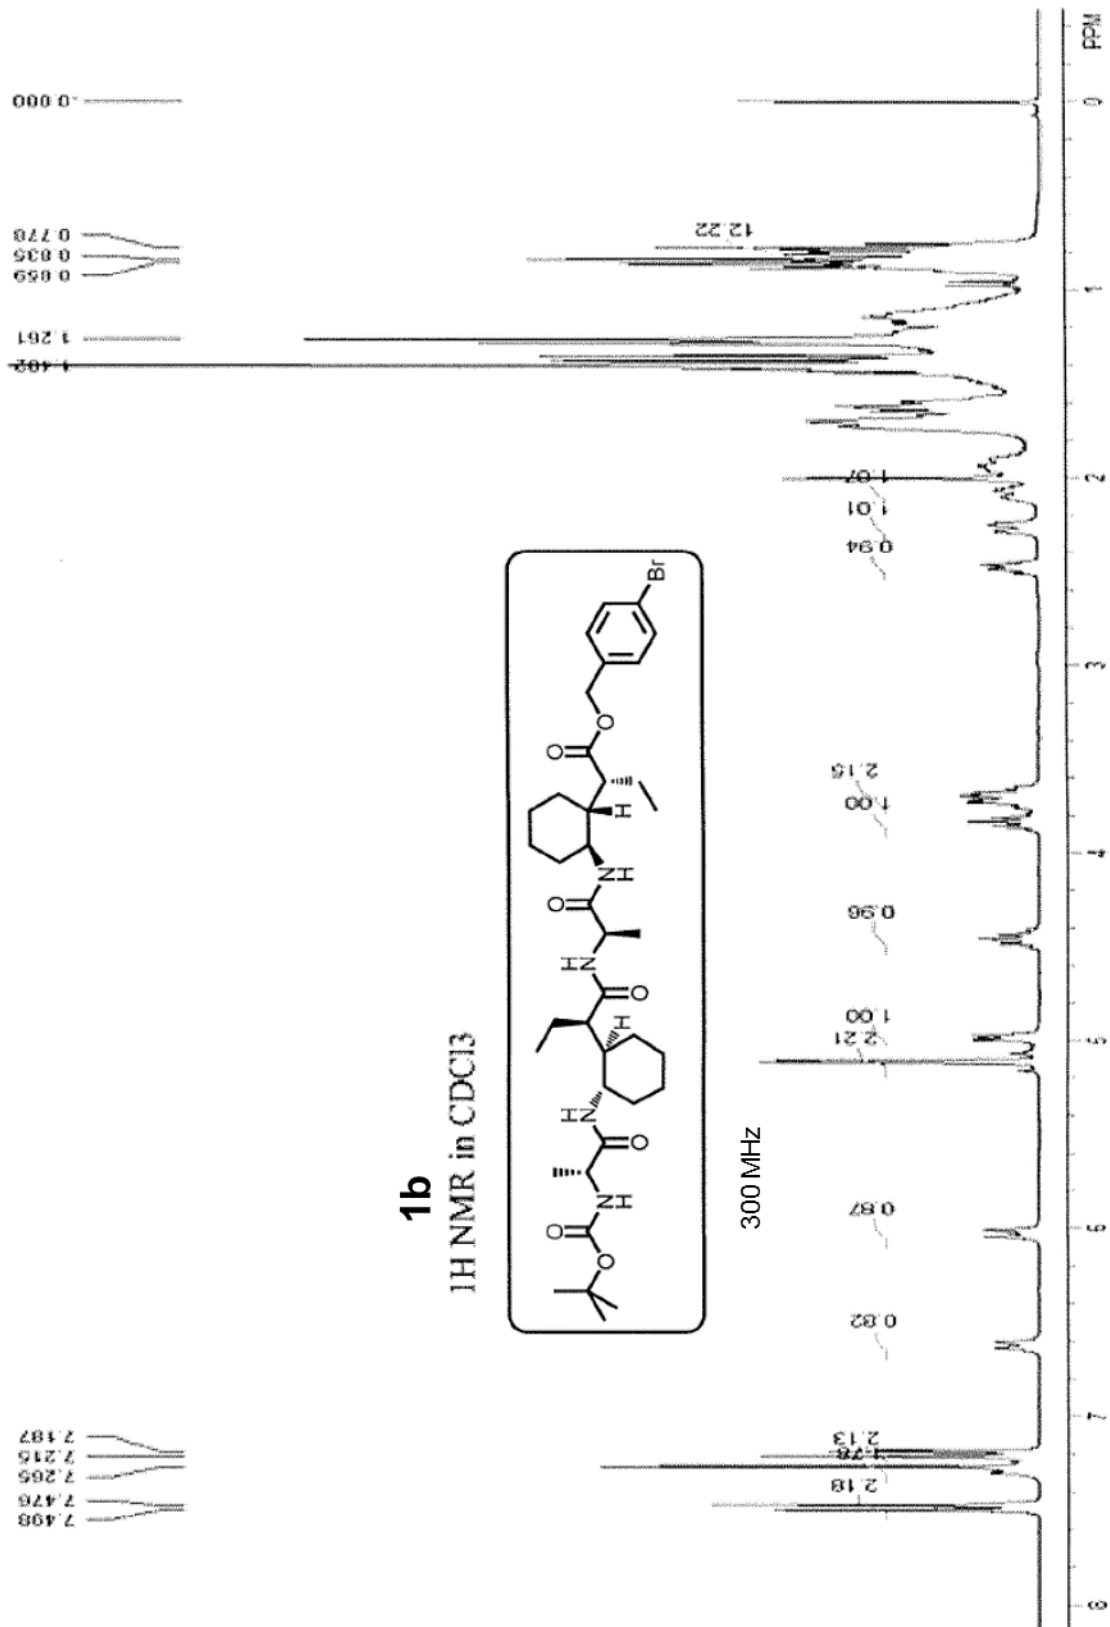

D1312051343\_BFF3-292Bx.10.fid  
Group Gellman  
PROTON CDCl3 /home/bfisher/av400 bfisher 72

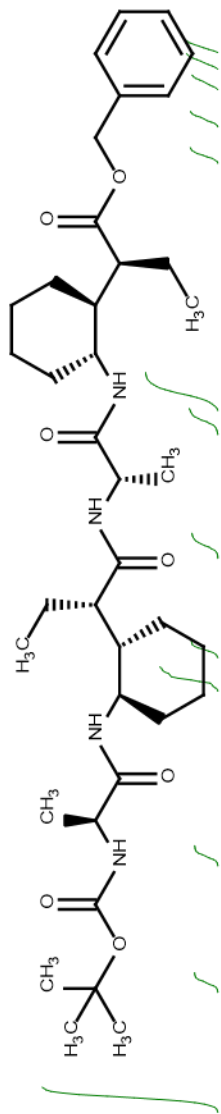

HNMR in CDCl3  
400 MHz

*ent-1c*

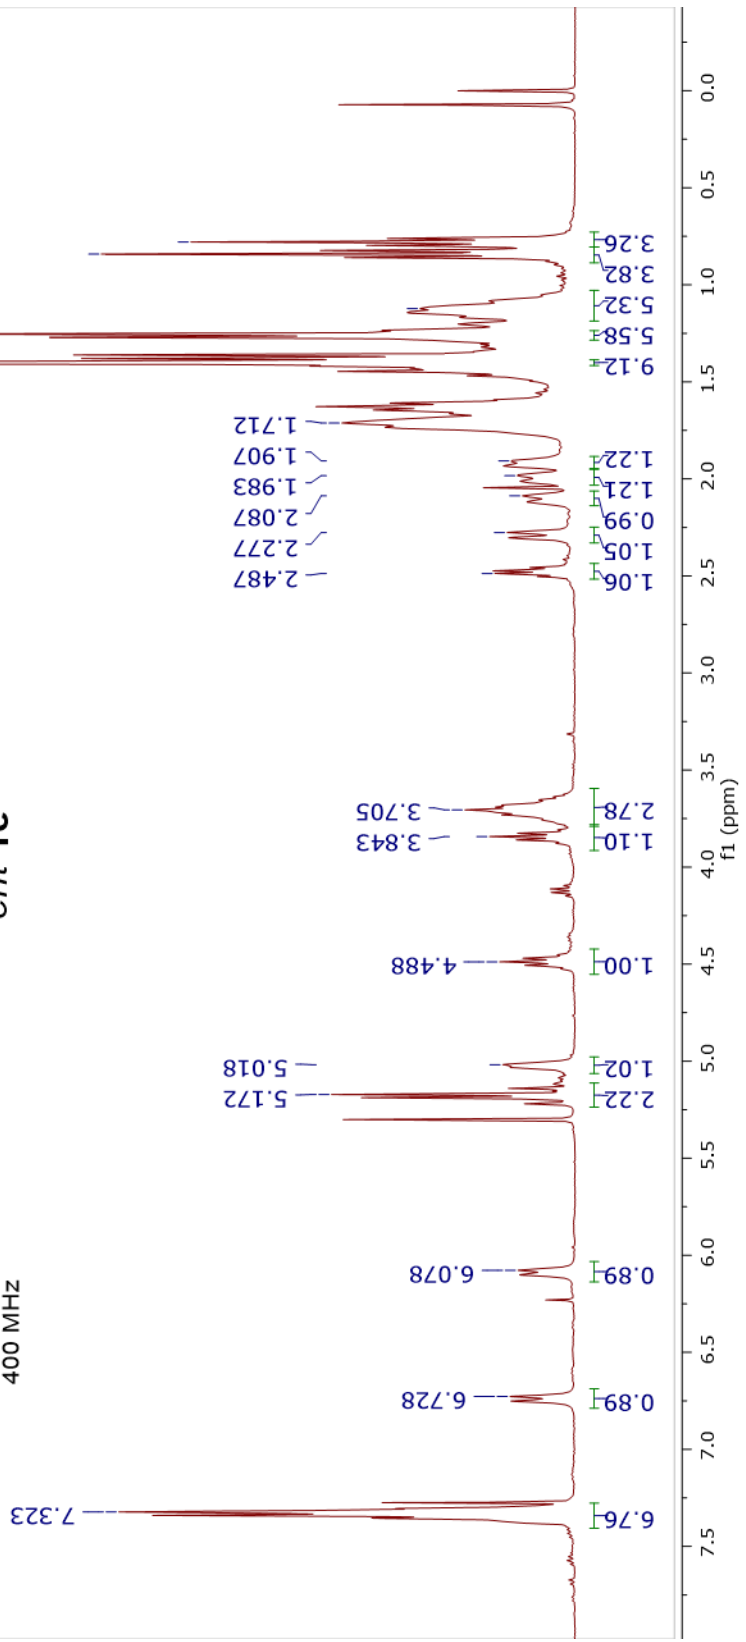







C1302072205\_BFF2-2441d.10.fid

Group Gellman

PROTON CDCl3 /home/bfisher/callisto/bfisher 30

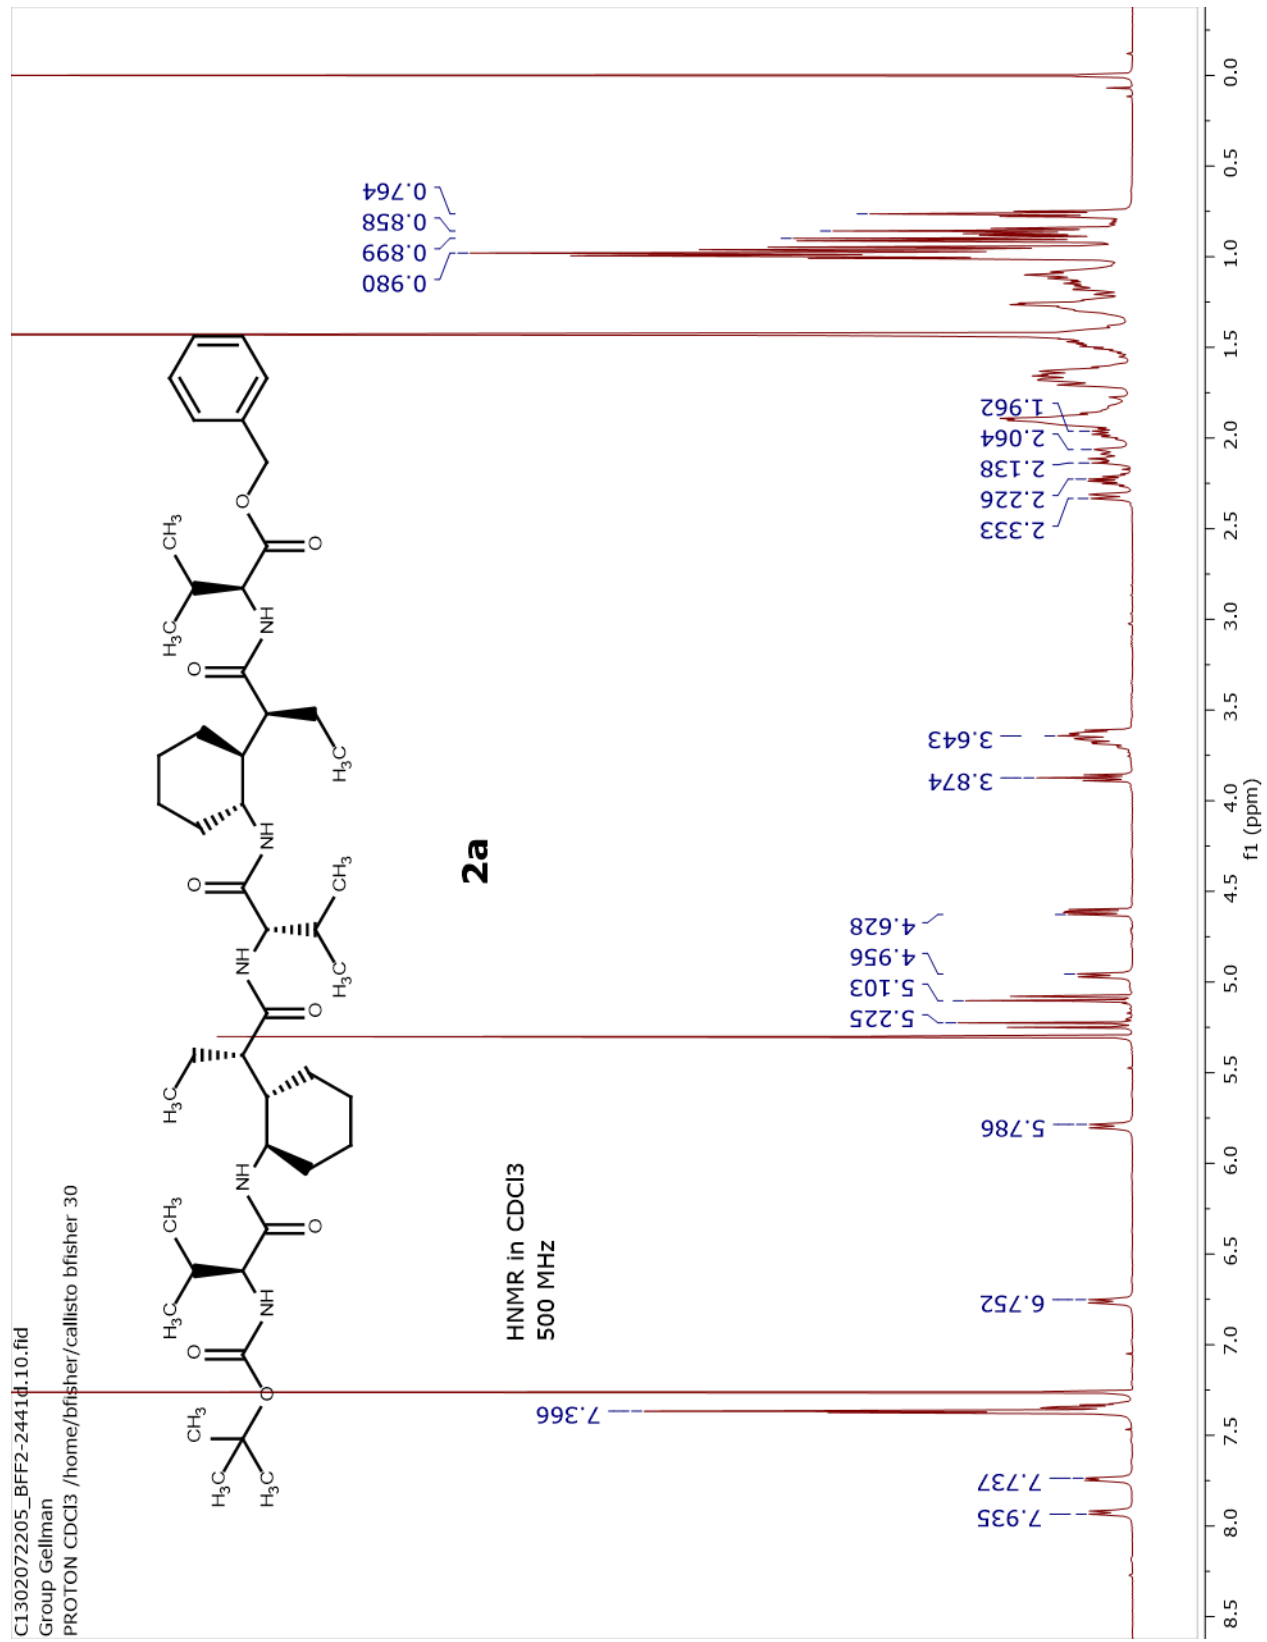

C1312091959\_BFF03-293.10.fid  
Group Gellman  
PROTON CDCI3 /home/bfisher/callisto/bfisher 10

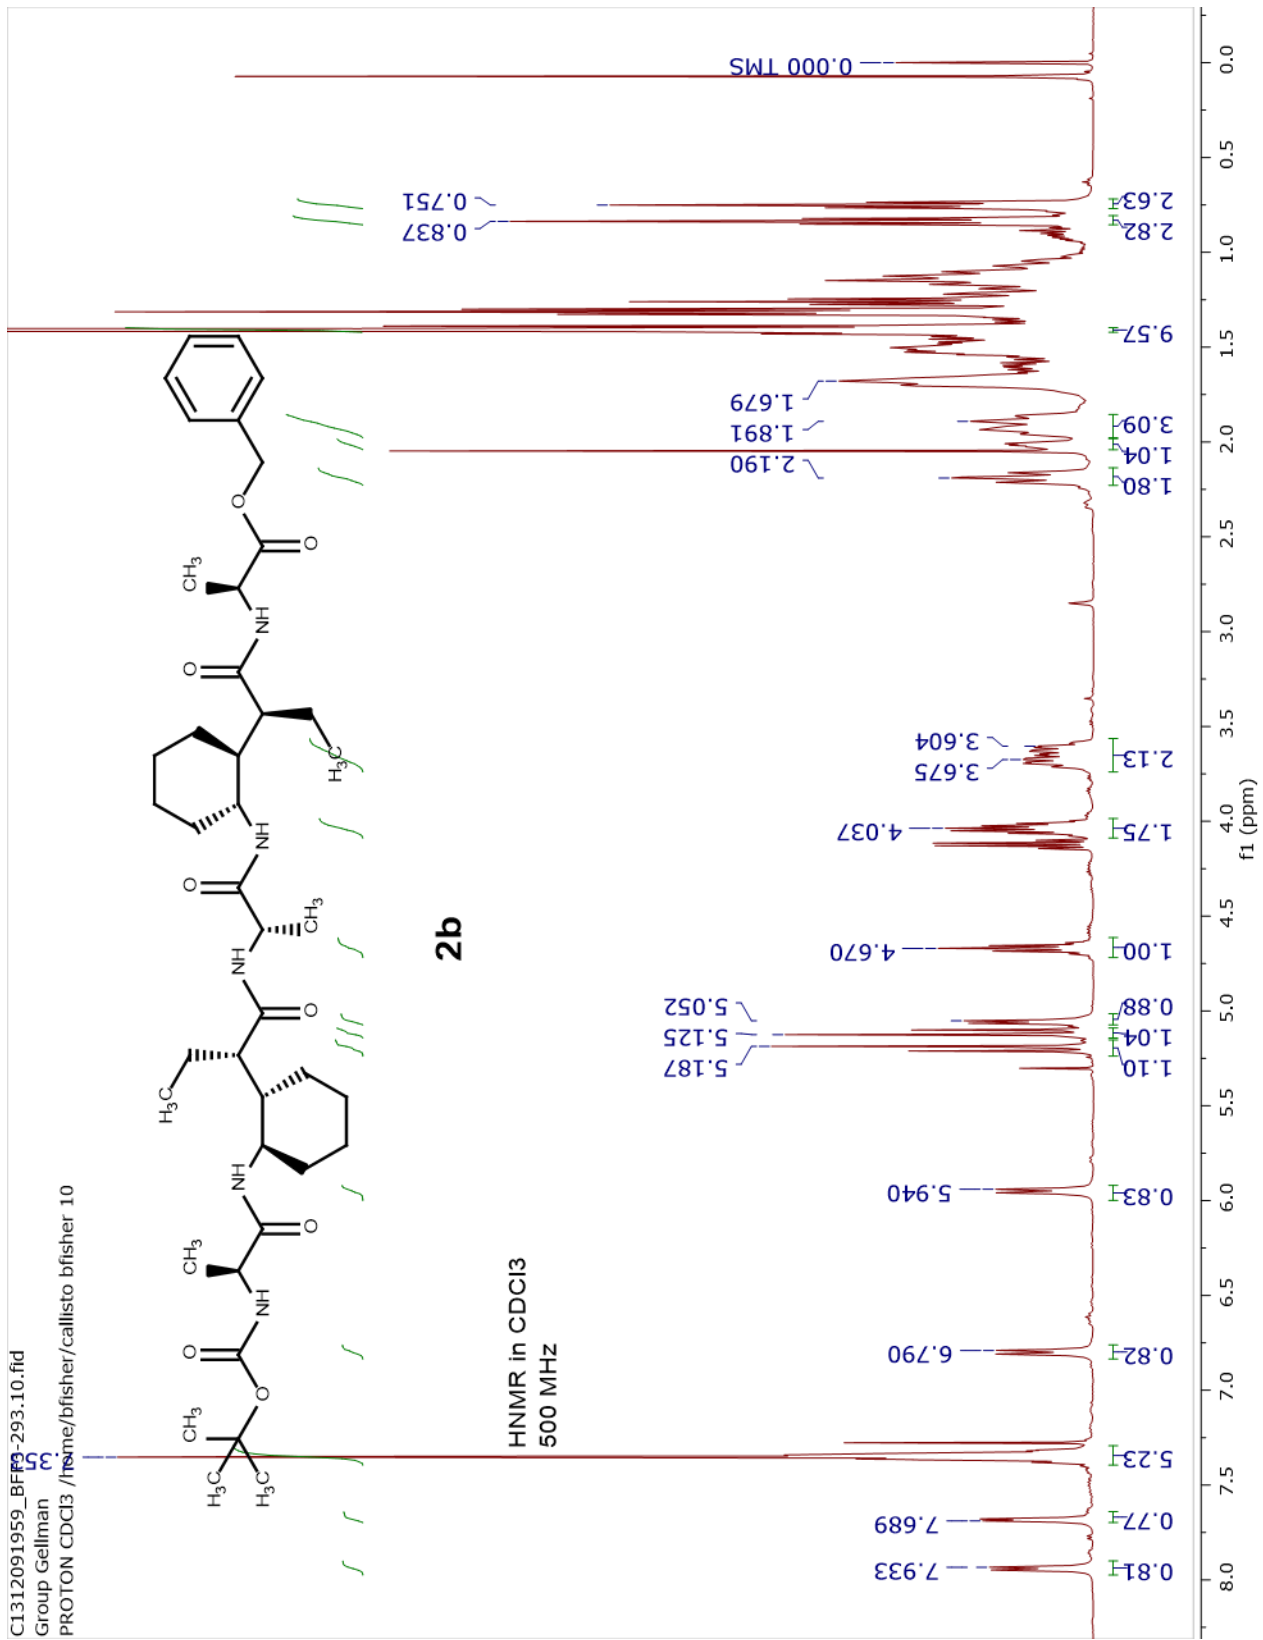

C1309041832\_BFF3-154\_3\_10mmM.10.fid  
 Group Gellman  
 PROTON CDCl3 /home/bfisher/callisto/bfisher 2

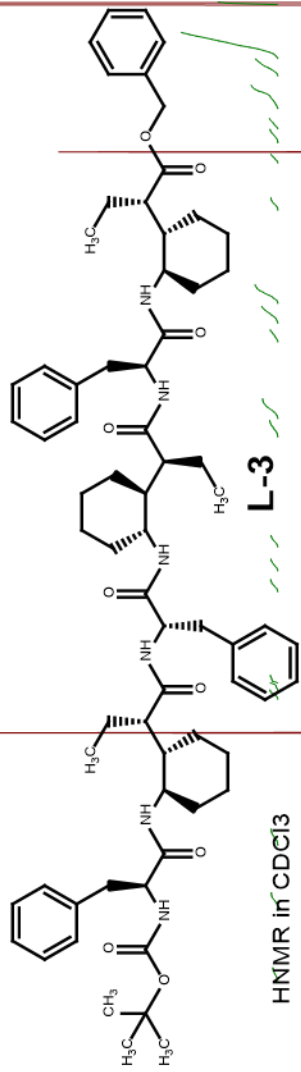

HNMR in  $\text{CDCl}_3$   
 500 MHz

7.297  
 7.212

1.217  
 0.975  
 0.796  
 0.692

2.450  
 2.196  
 1.03  
 1.03  
 2.074  
 2.009  
 1.17  
 1.26  
 1.849  
 3.95  
 1.720  
 1.607  
 1.551

3.155  
 3.041  
 2.948

3.649  
 3.558

4.502  
 4.392  
 4.263

5.087  
 5.028

6.196  
 5.856

6.599

7.790

8.169

35.05

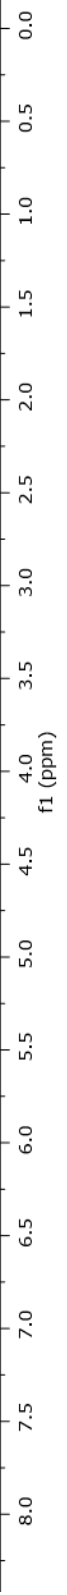

C1503091648\_BFF3-129.10.fid  
Group Gellman  
PROTON CDCI3 /home/bfisher/callisto/bfisher 41

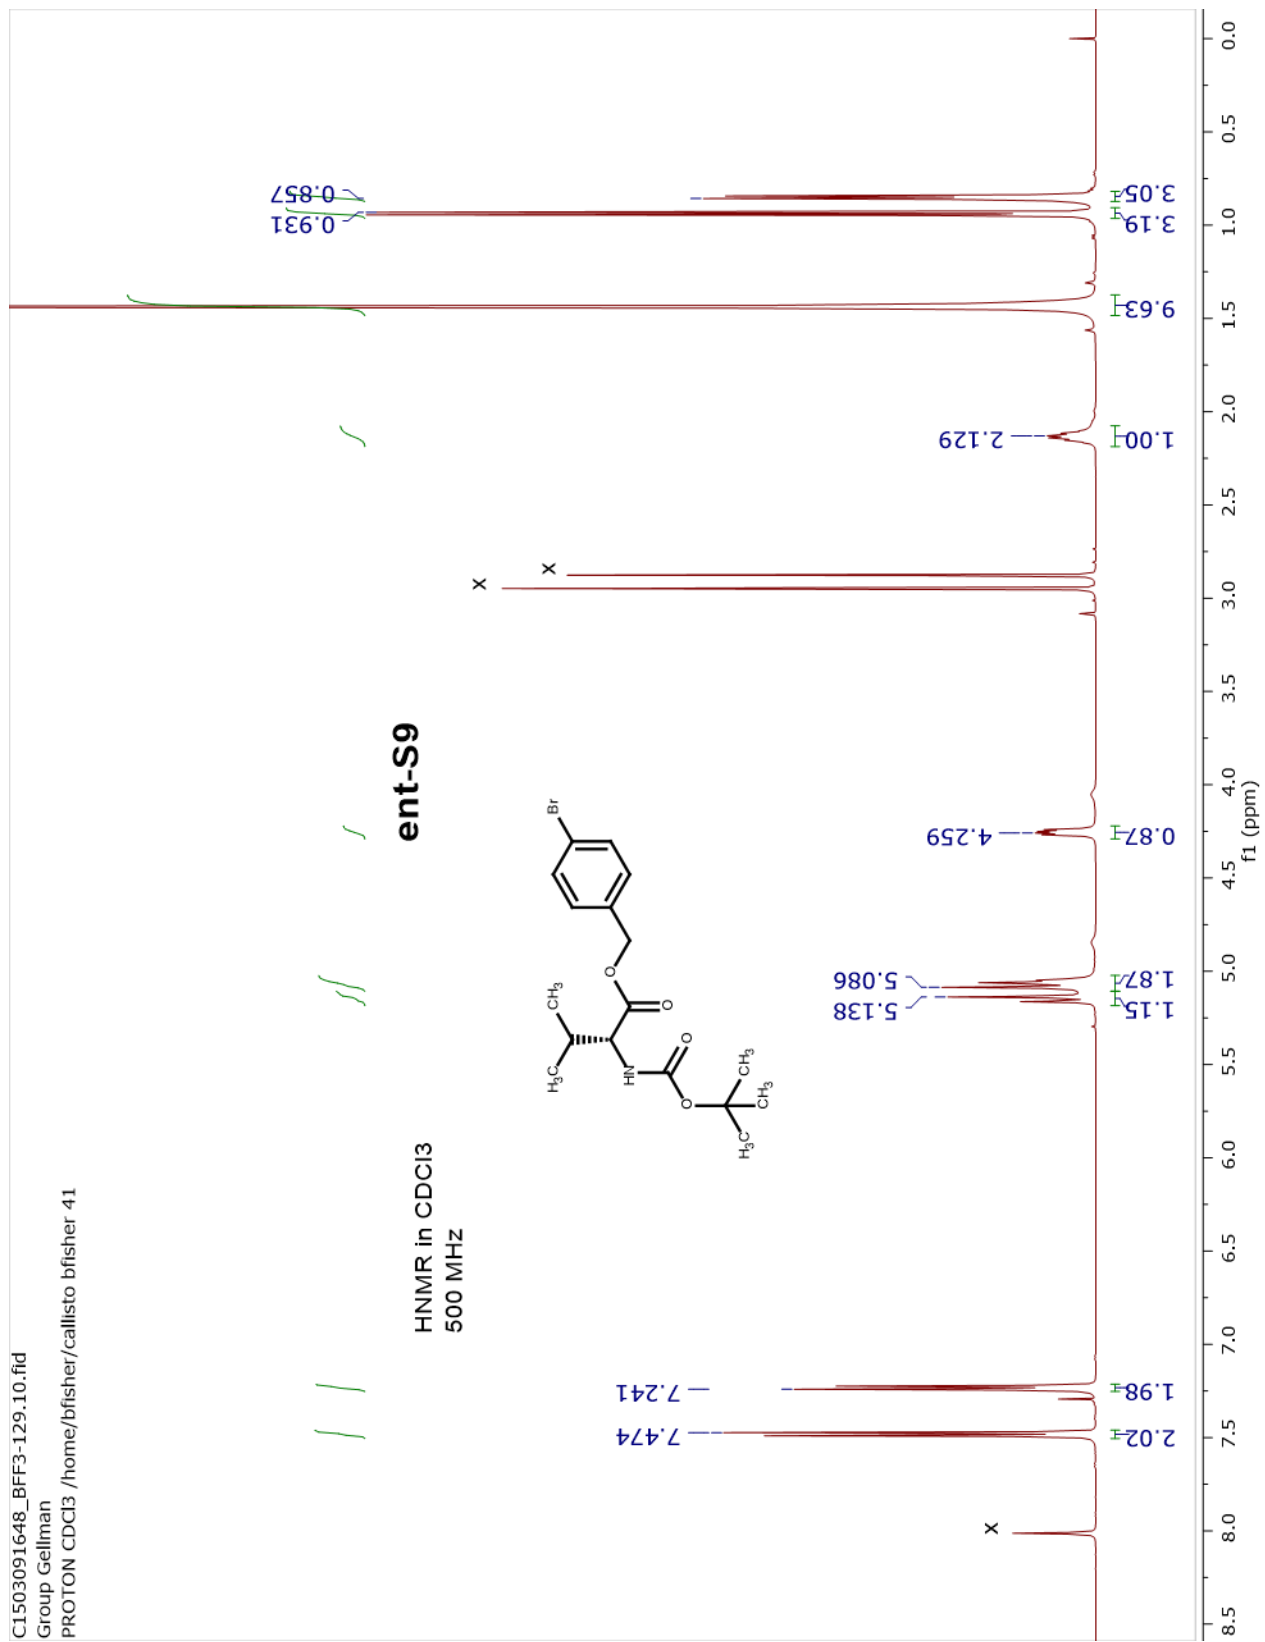



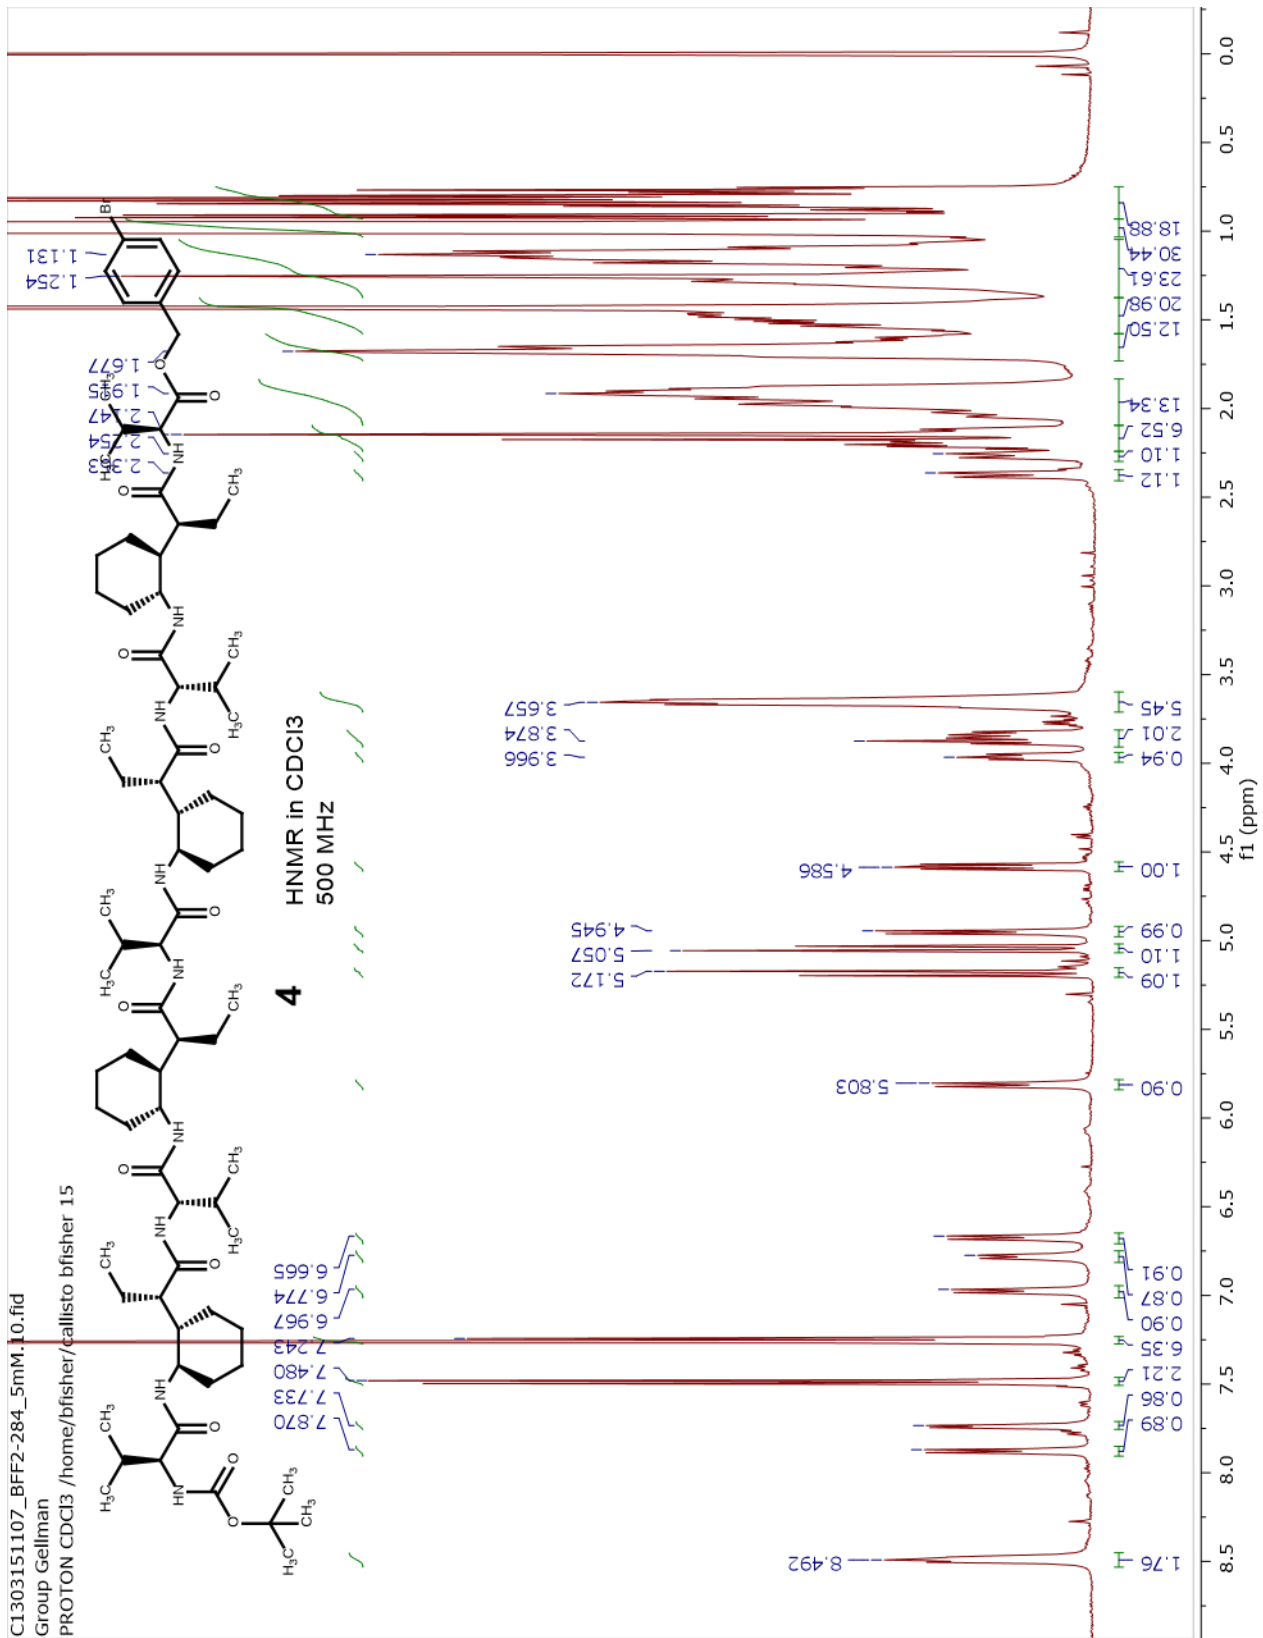

C1503091649\_BFF4-082.10.fid  
Group Gellman  
PROTON CDCl3 /home/bfisher/callisto/bfisher 42

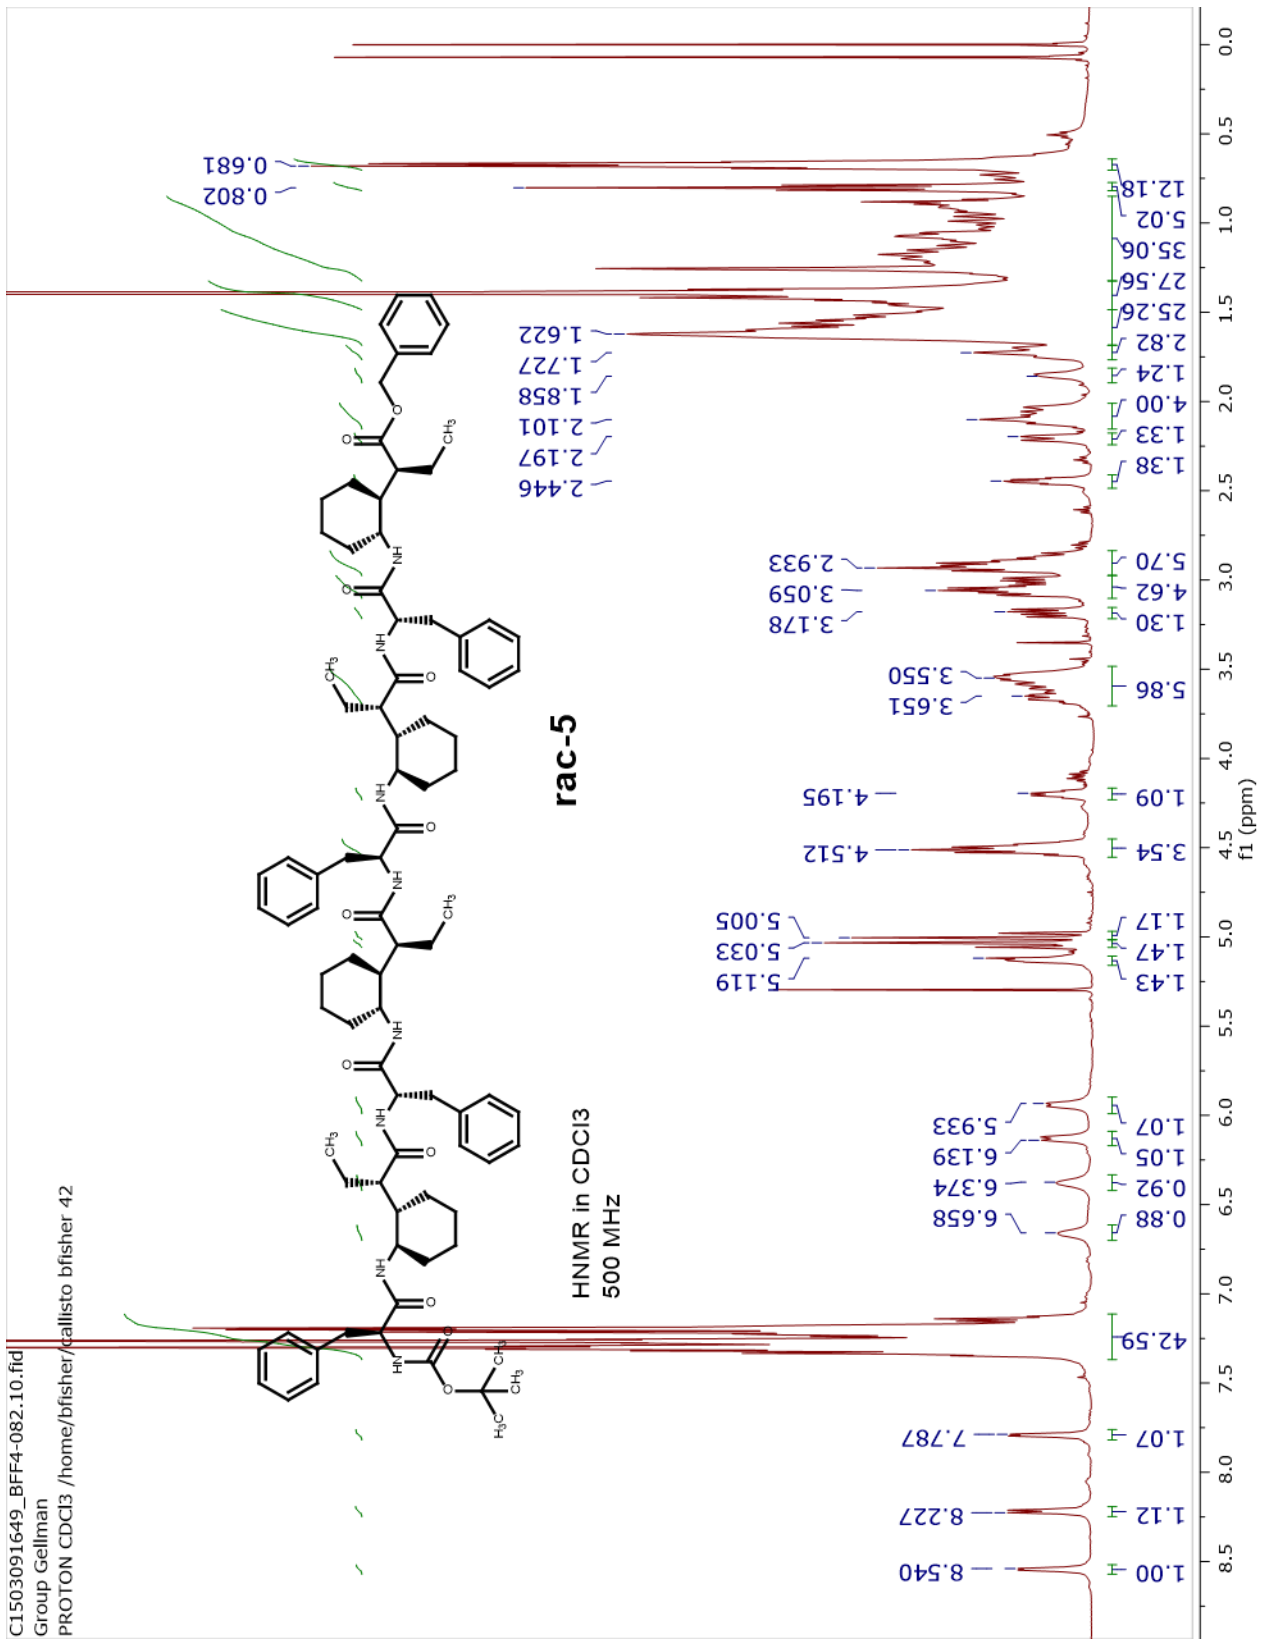

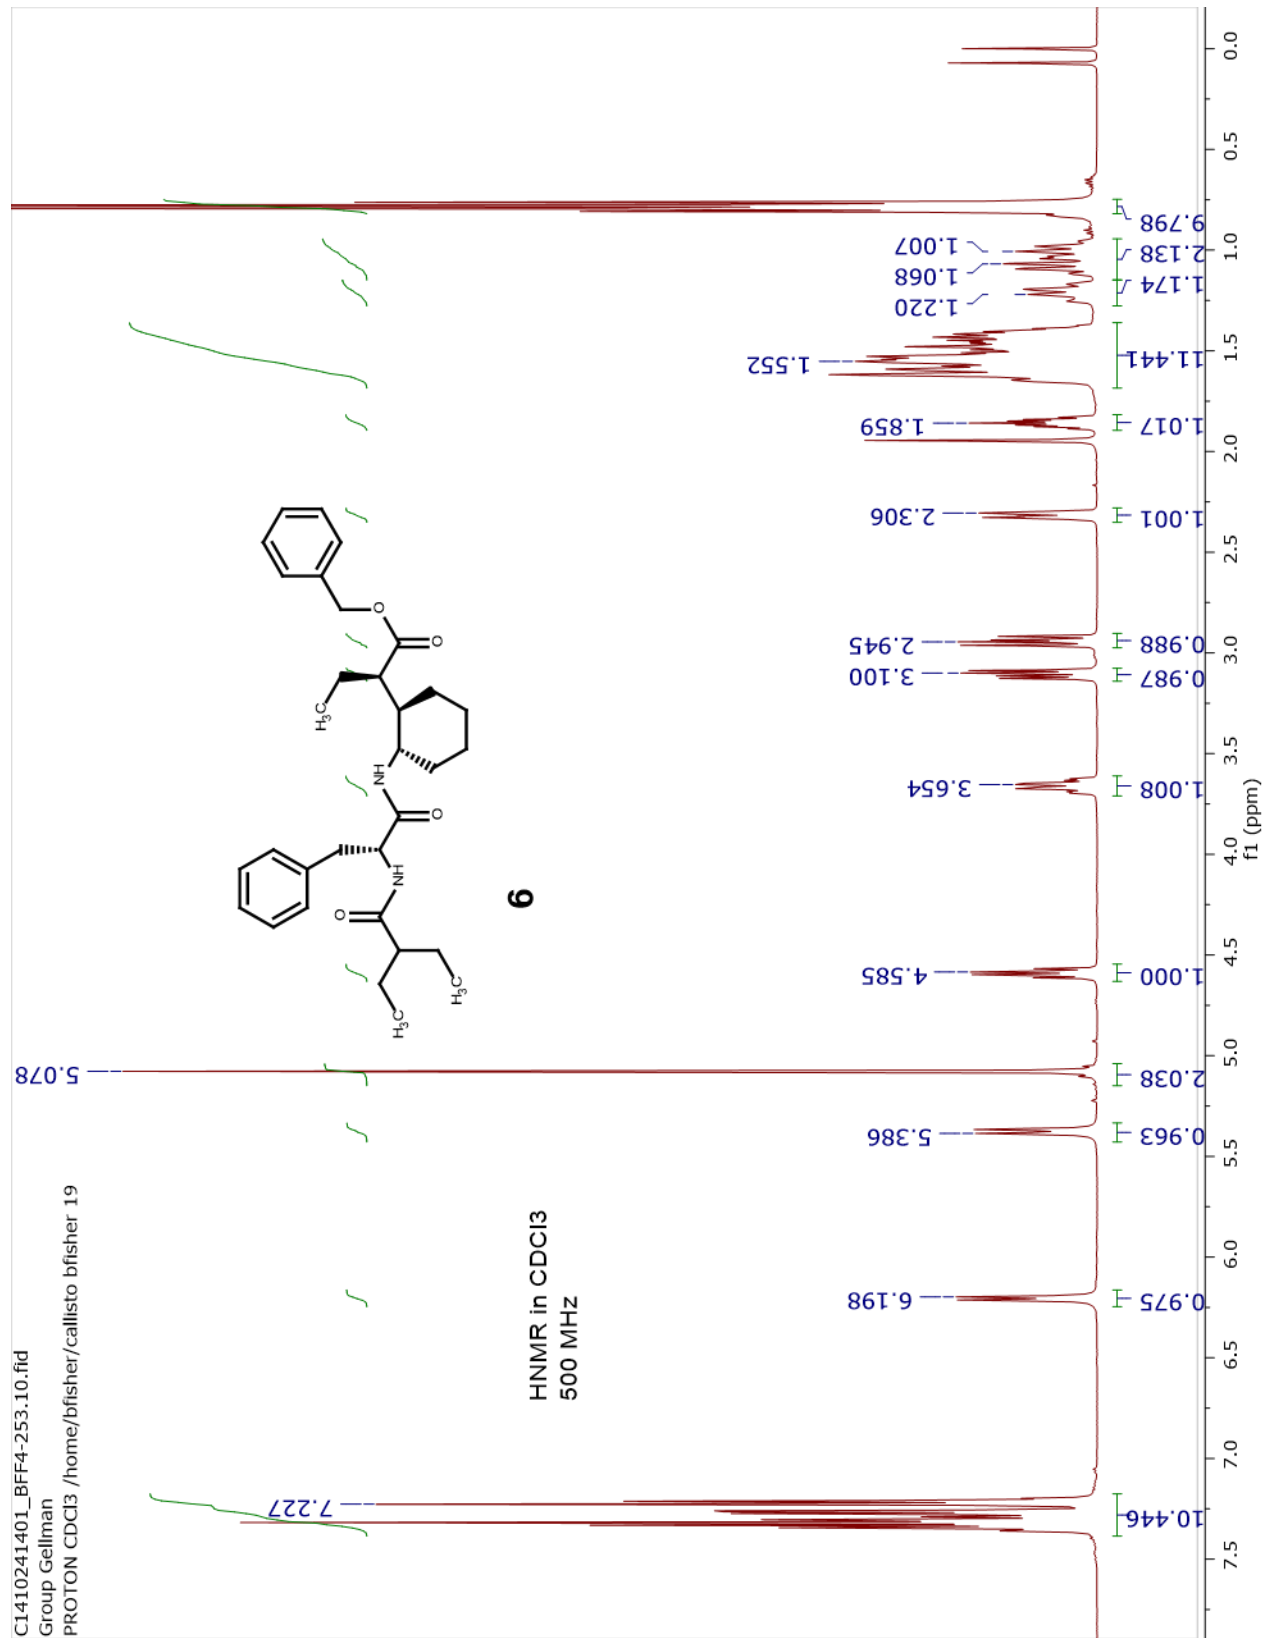



D1301251126\_BFF2-239-10mM.10.fid  
Group Gellman  
PROTON CDCl3 /home/bfischer/av400 bfischer 22

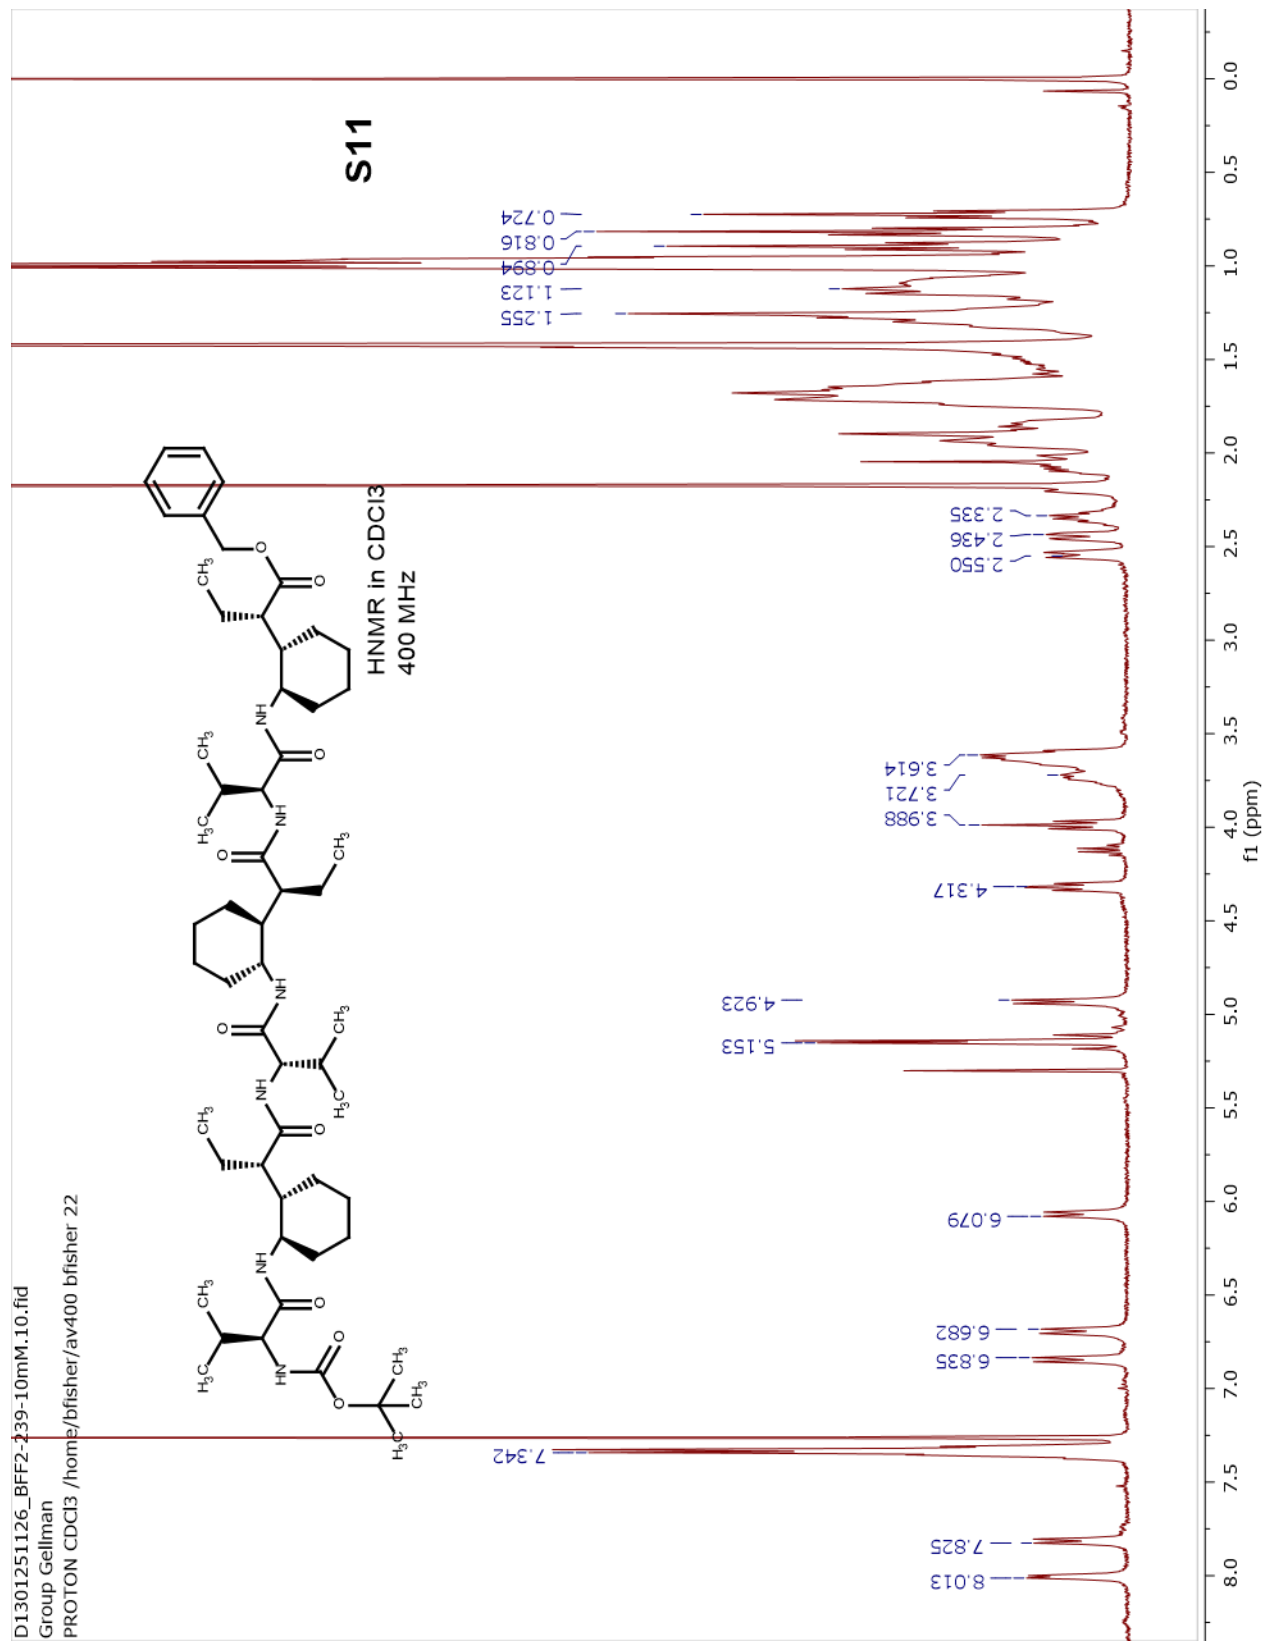

C1211171518\_BFF2-161\_C13.11.fid  
Group Gellman  
PROTON CDCI3 /home/bfisher/callisto/bfisher 3

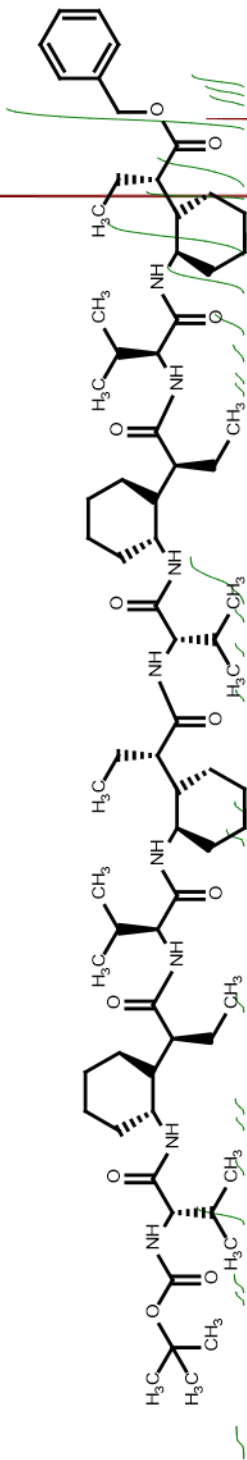

**S12**

HNMR in CDCI3  
500 MHz

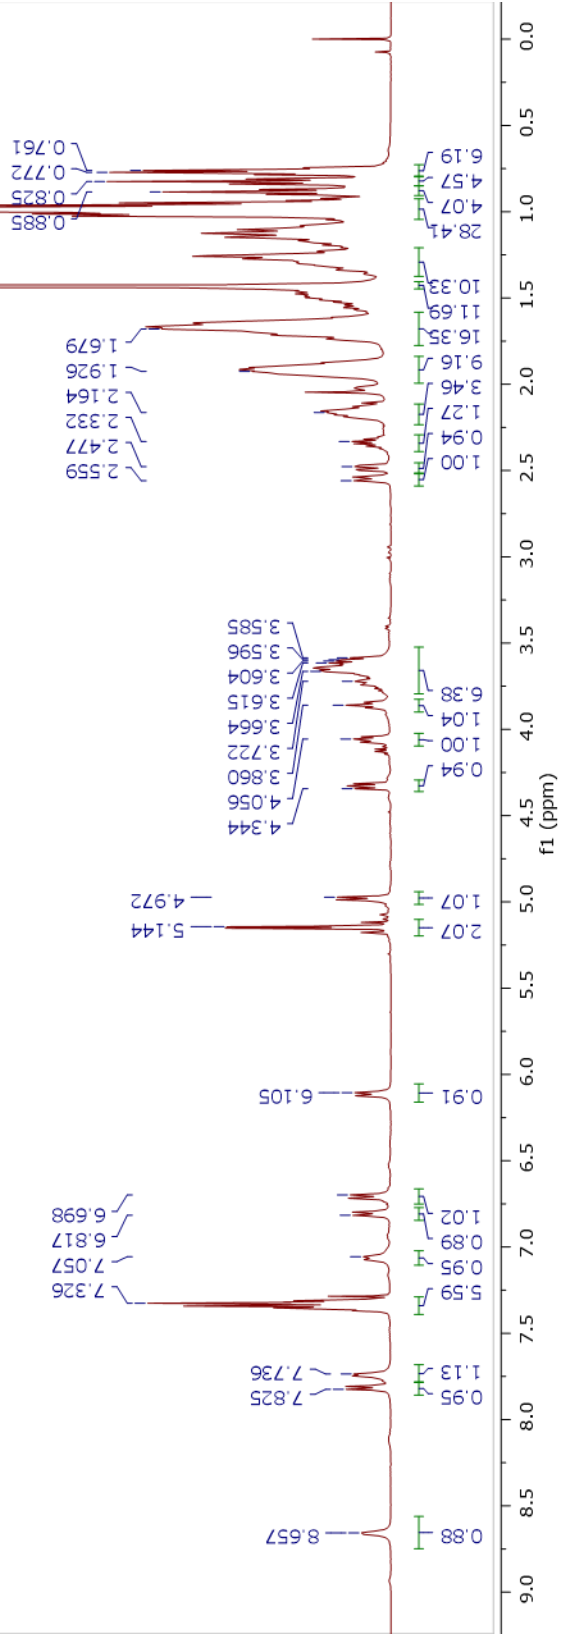

C1410281453\_BFF4-258\_1.10.fid  
Group Gellman  
PROTON CDCl3 /home/bfisher/callisto/bfisher 41

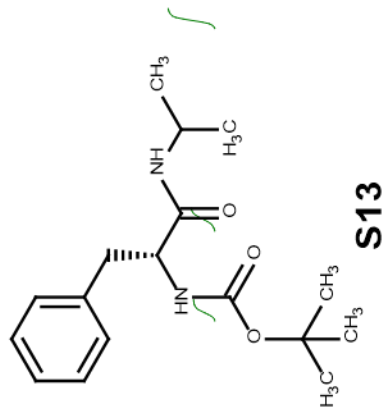

HNMR in CDCl3  
500 MHz

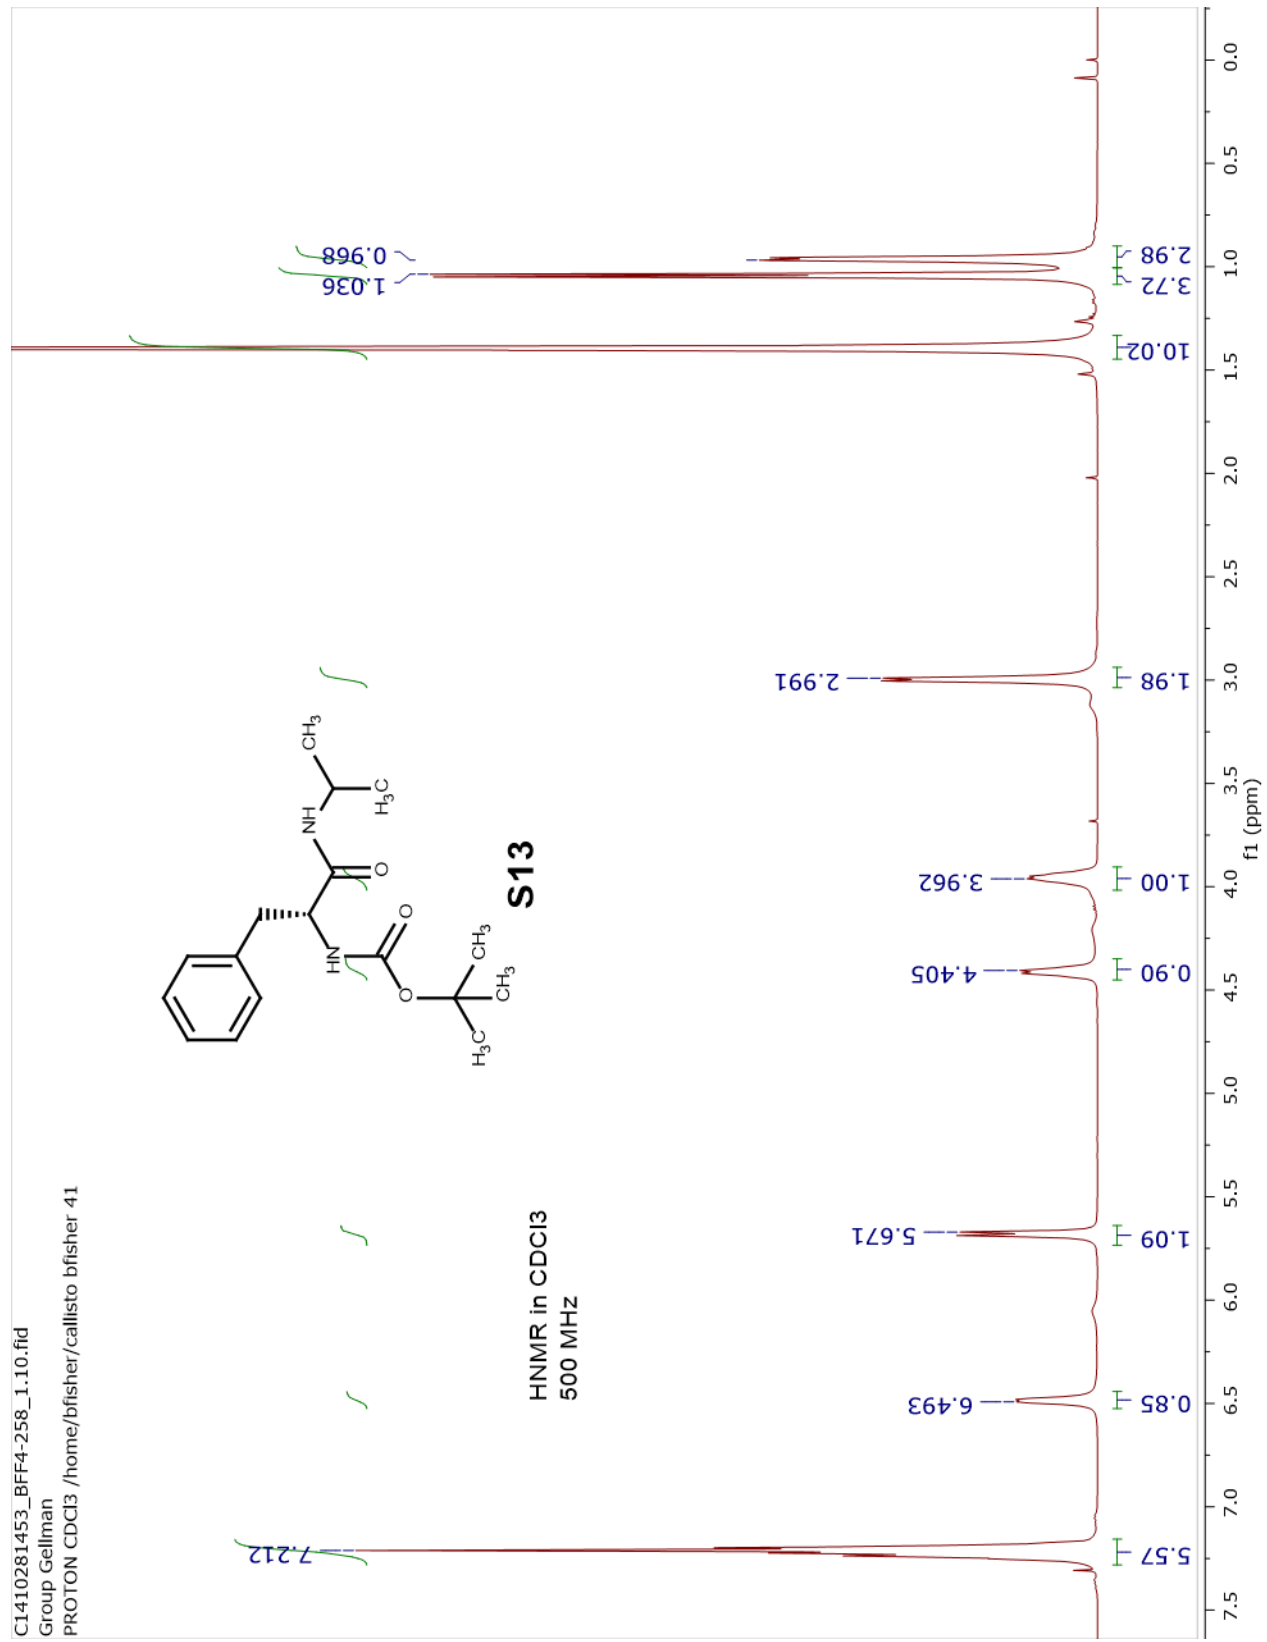

C1411030939\_BFF4-264.10.fid  
Group Gellman  
PROTON CDCl3 /home/bfisher/callisto/bfisher 29

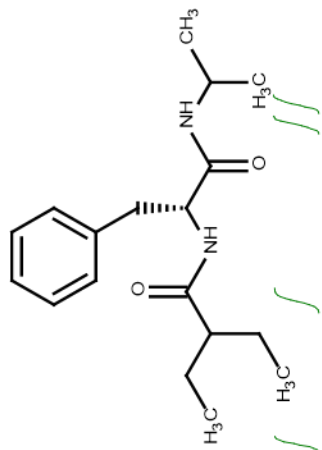

**S14**

HNMR in CDCl3  
500 MHz

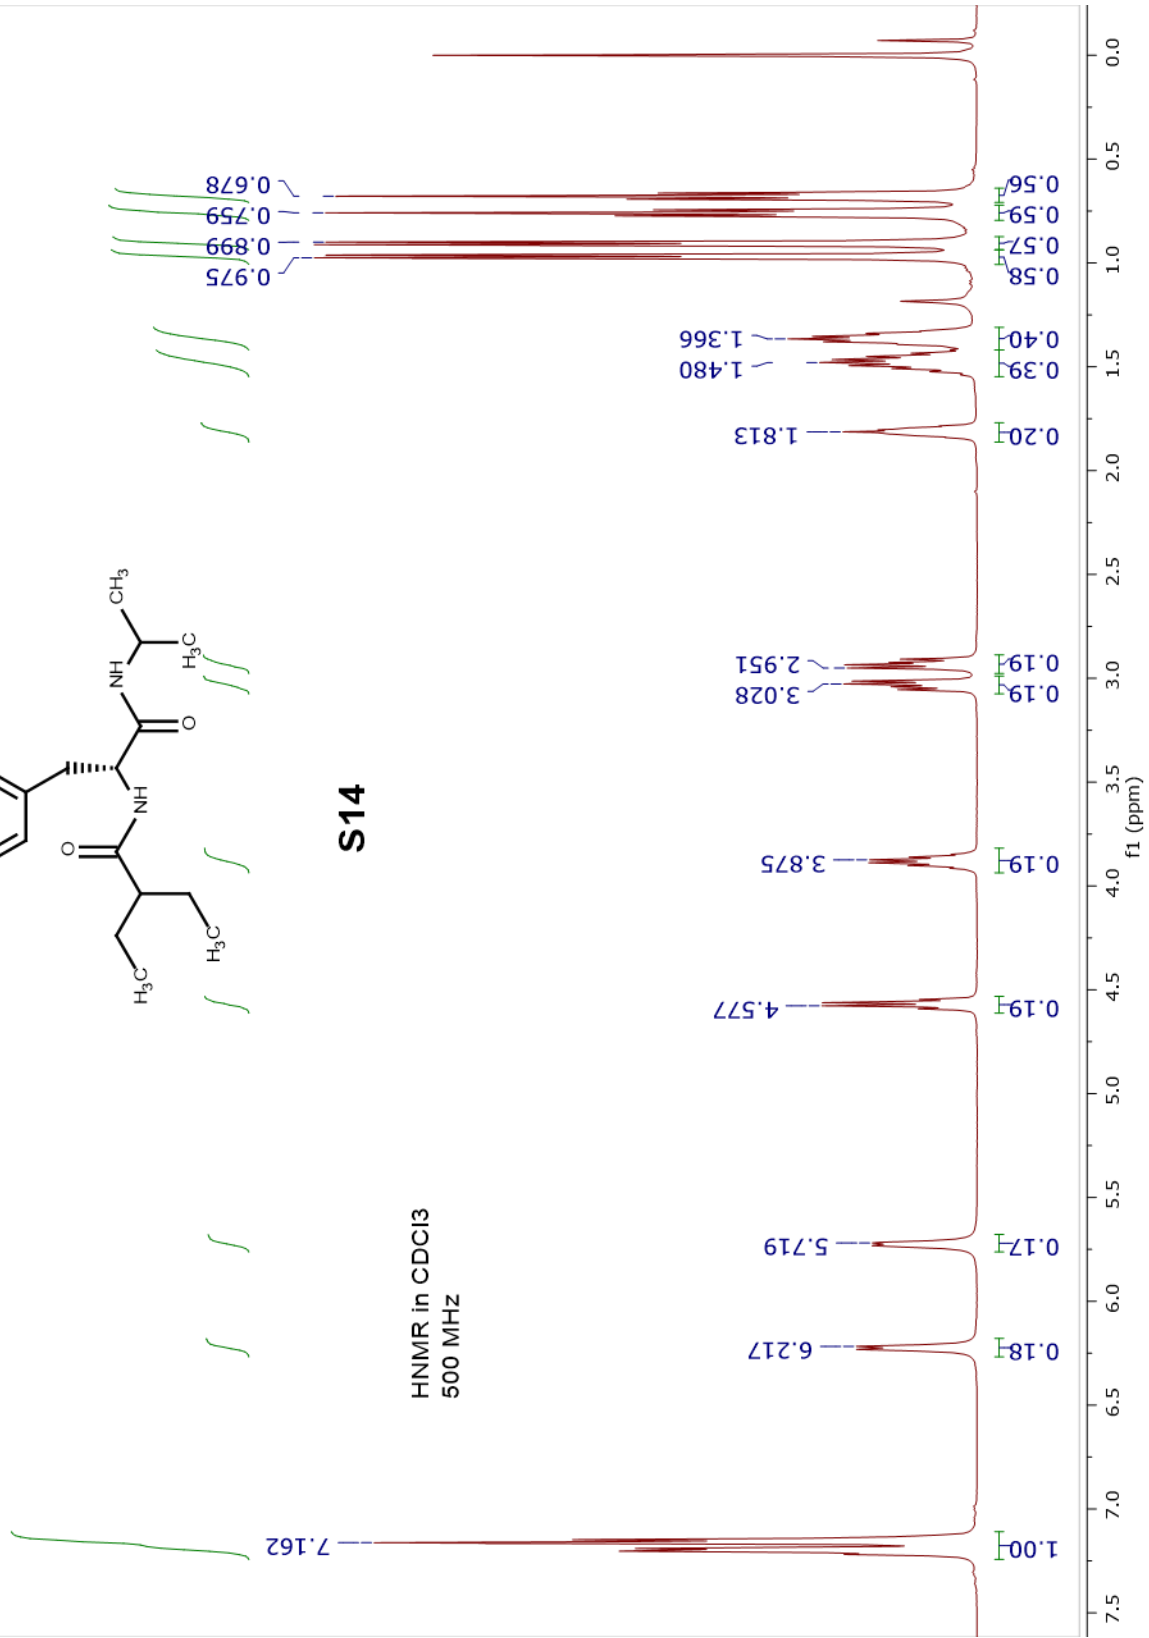

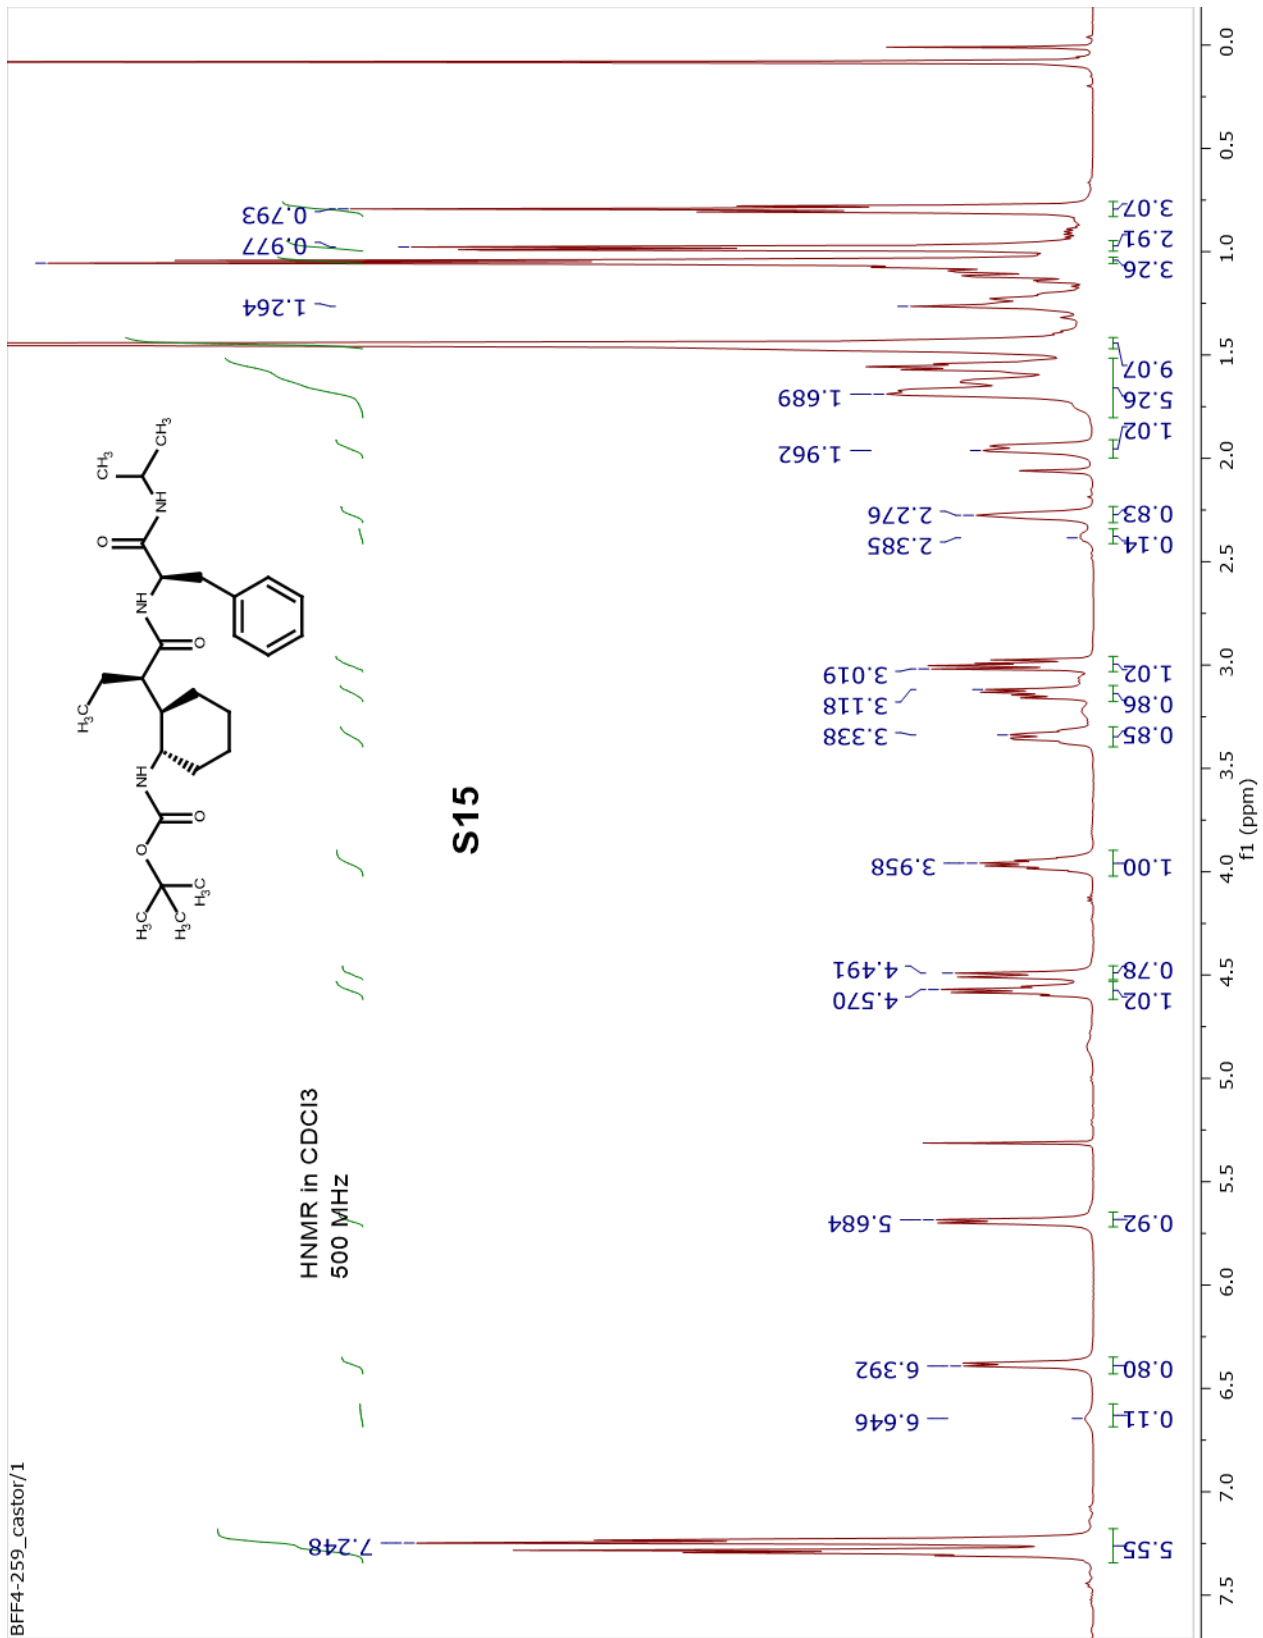

## b. <sup>13</sup>C-NMR Spectra

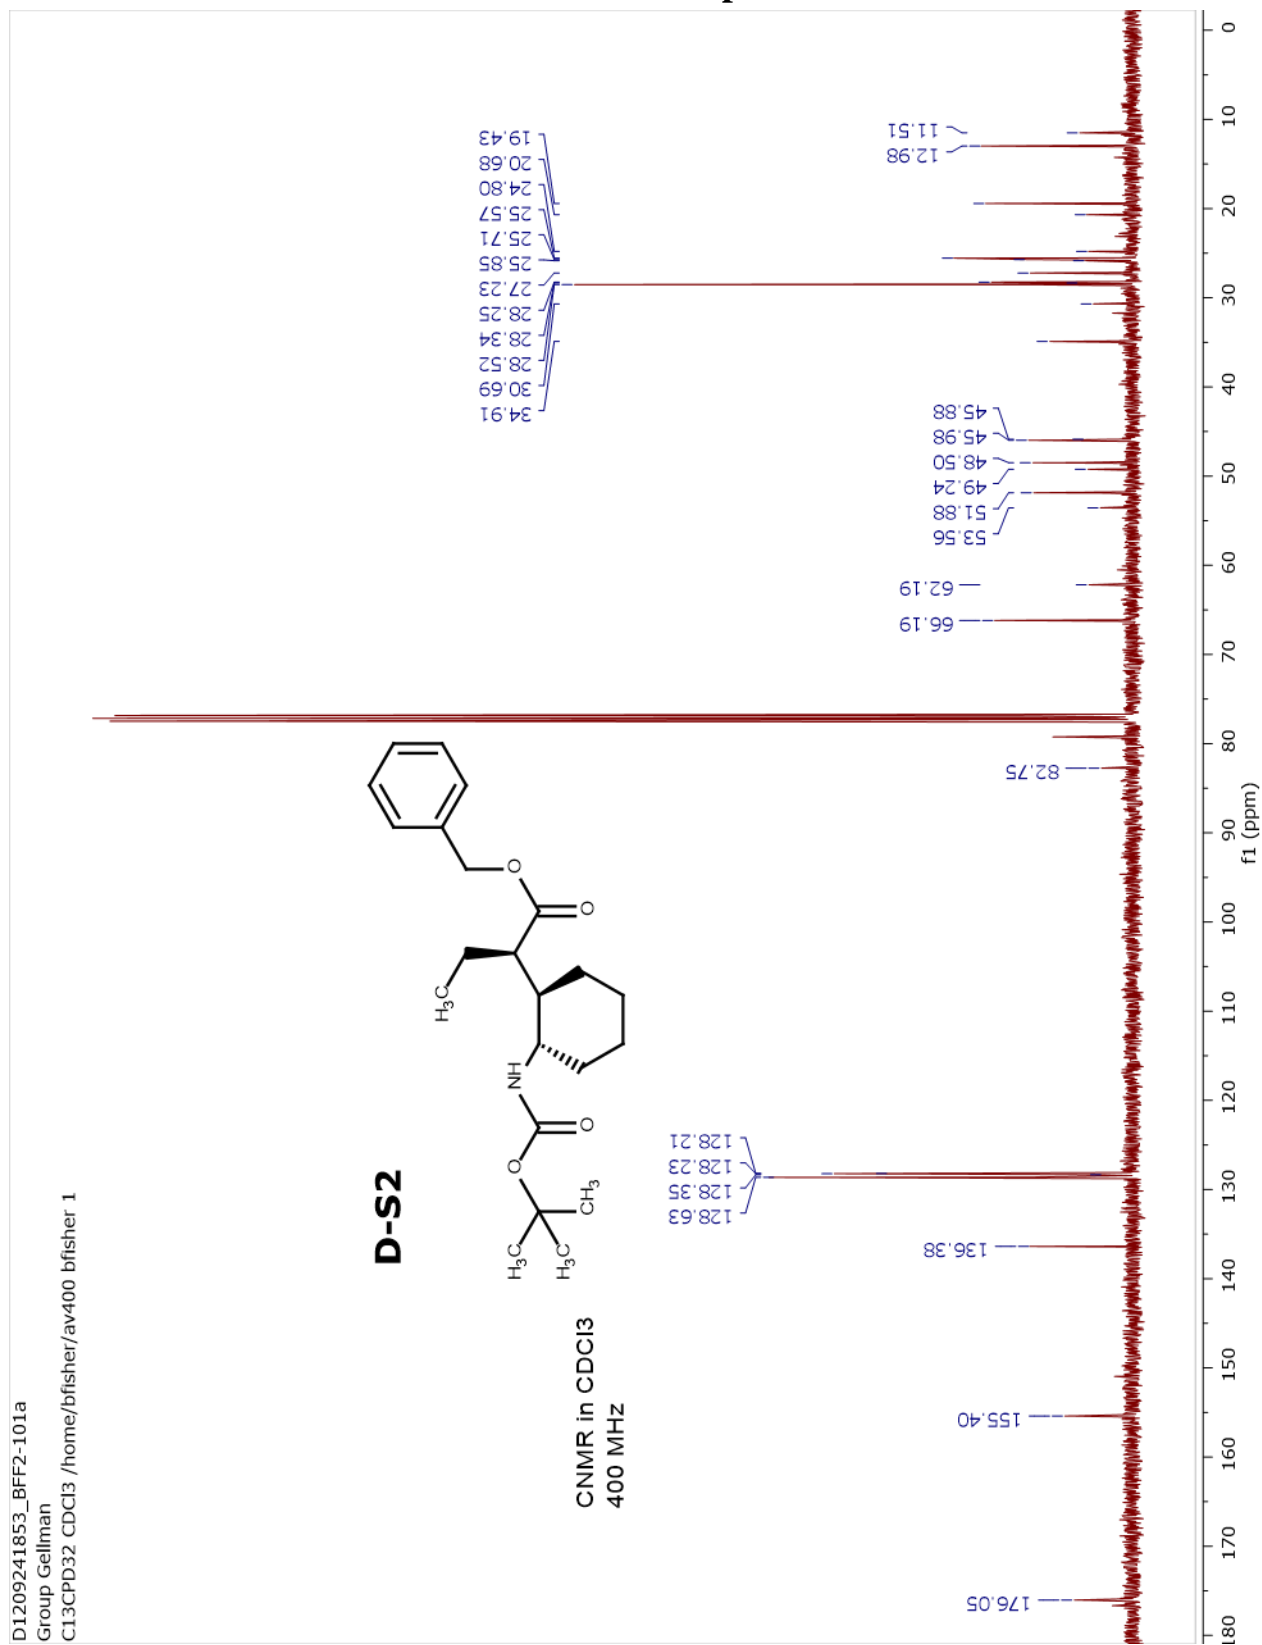

C1403101926\_BFF4-050.11.fid

Group Gellman

C13CPD32 CDC13 /home/bfisher/callisto/bfisher 13

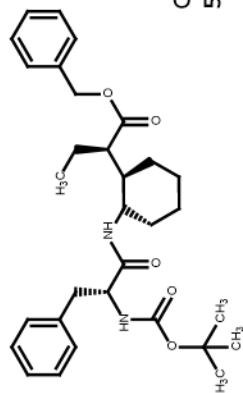

**D-S3**

CNMR in CDC13  
500 MHz

13.01  
14.32  
19.14  
21.17  
23.58  
24.83  
25.24  
25.39  
25.47  
26.82  
28.21  
28.37  
28.52  
28.93  
36.79  
38.97

127.04  
128.23  
128.32  
128.40  
128.46  
128.48  
128.53  
128.60  
128.71  
128.80  
129.39

45.09  
47.98  
50.14

56.57  
60.51

66.16

80.16

136.88  
136.30

155.36

170.44  
175.62

0.12

f1 (ppm)





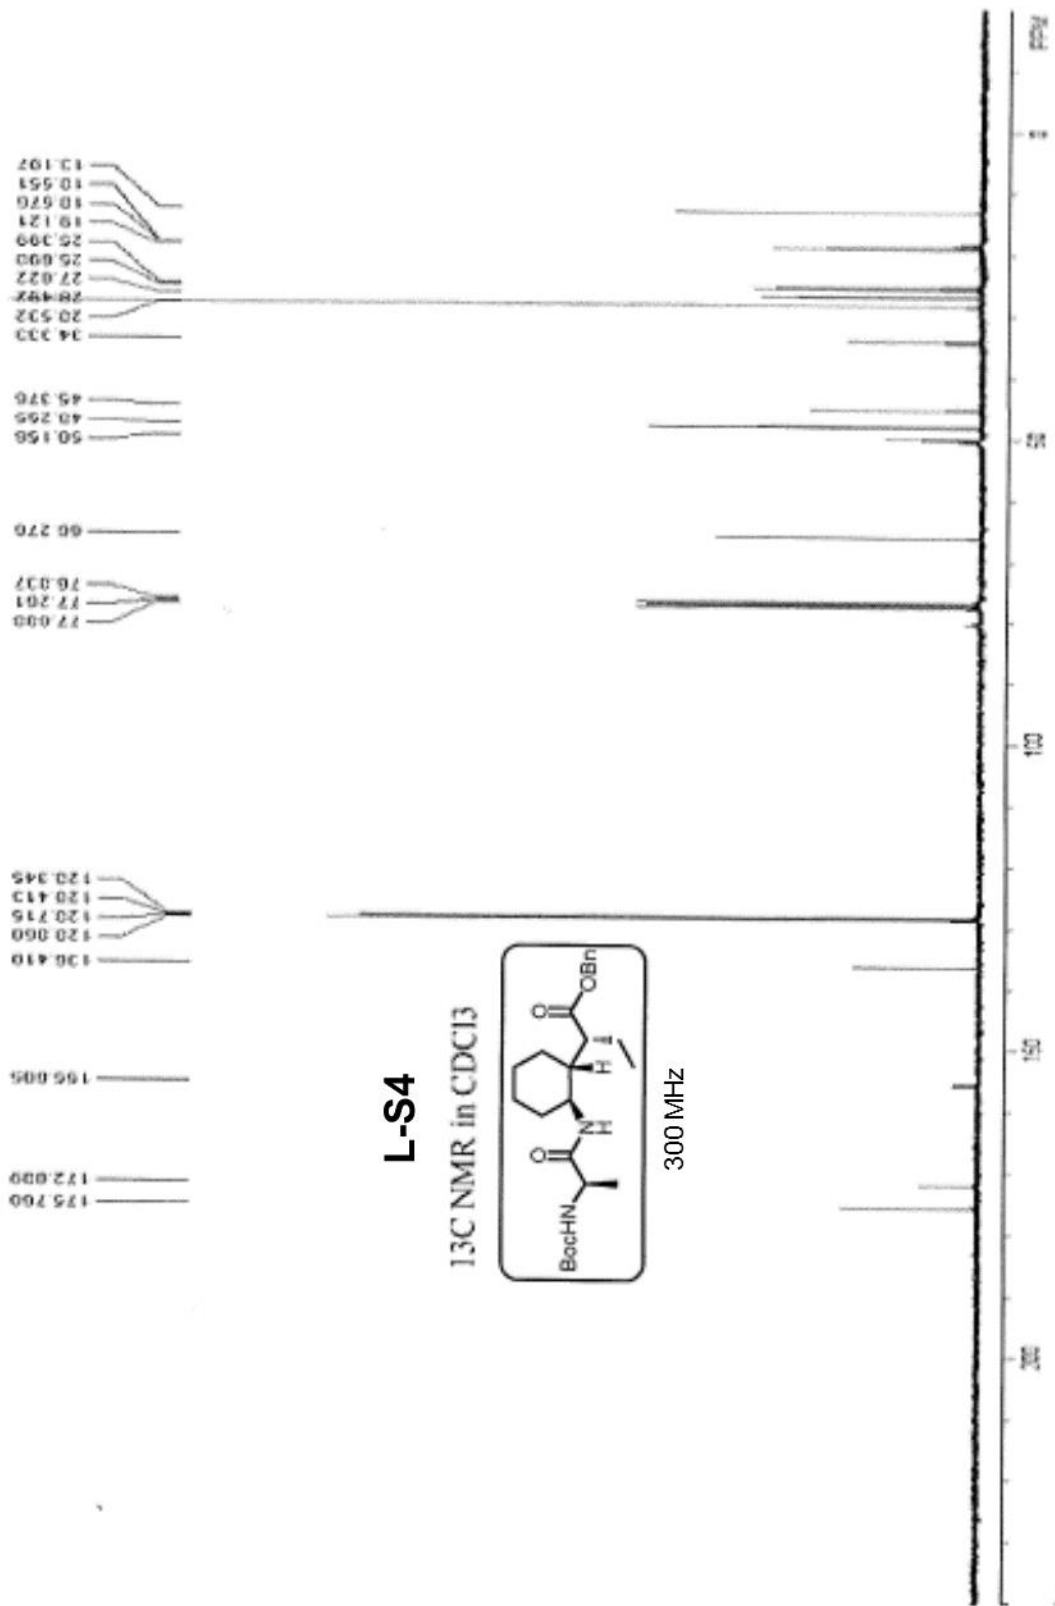

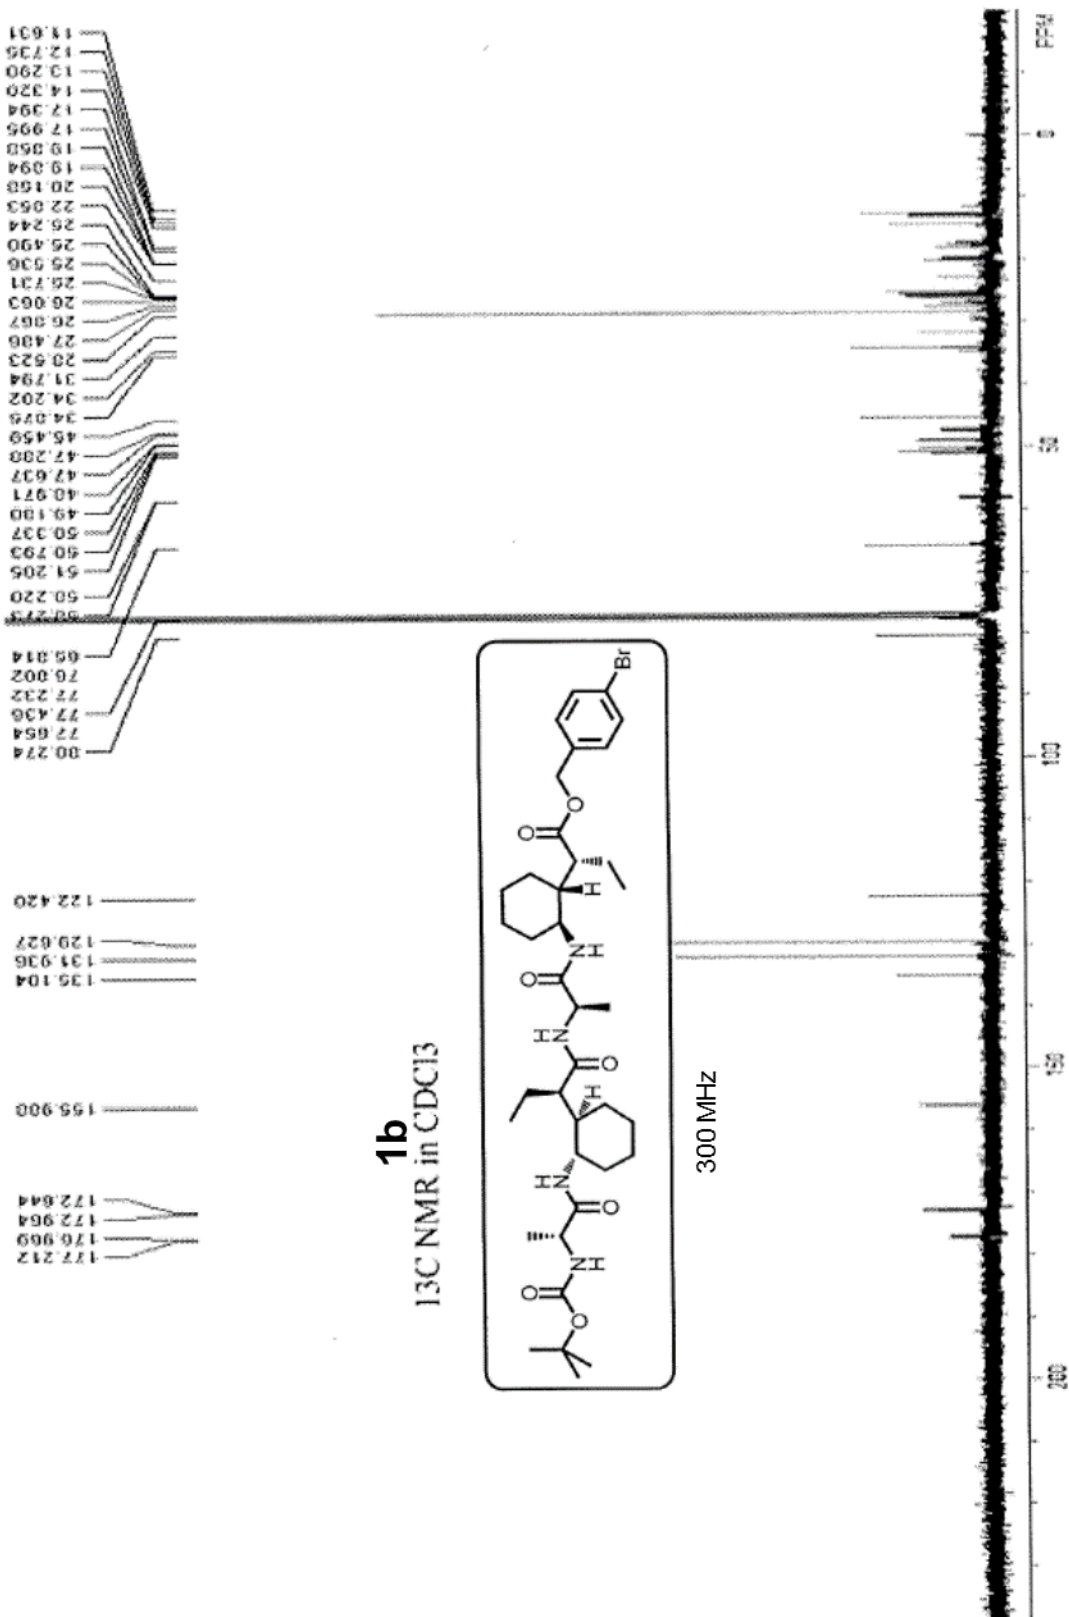

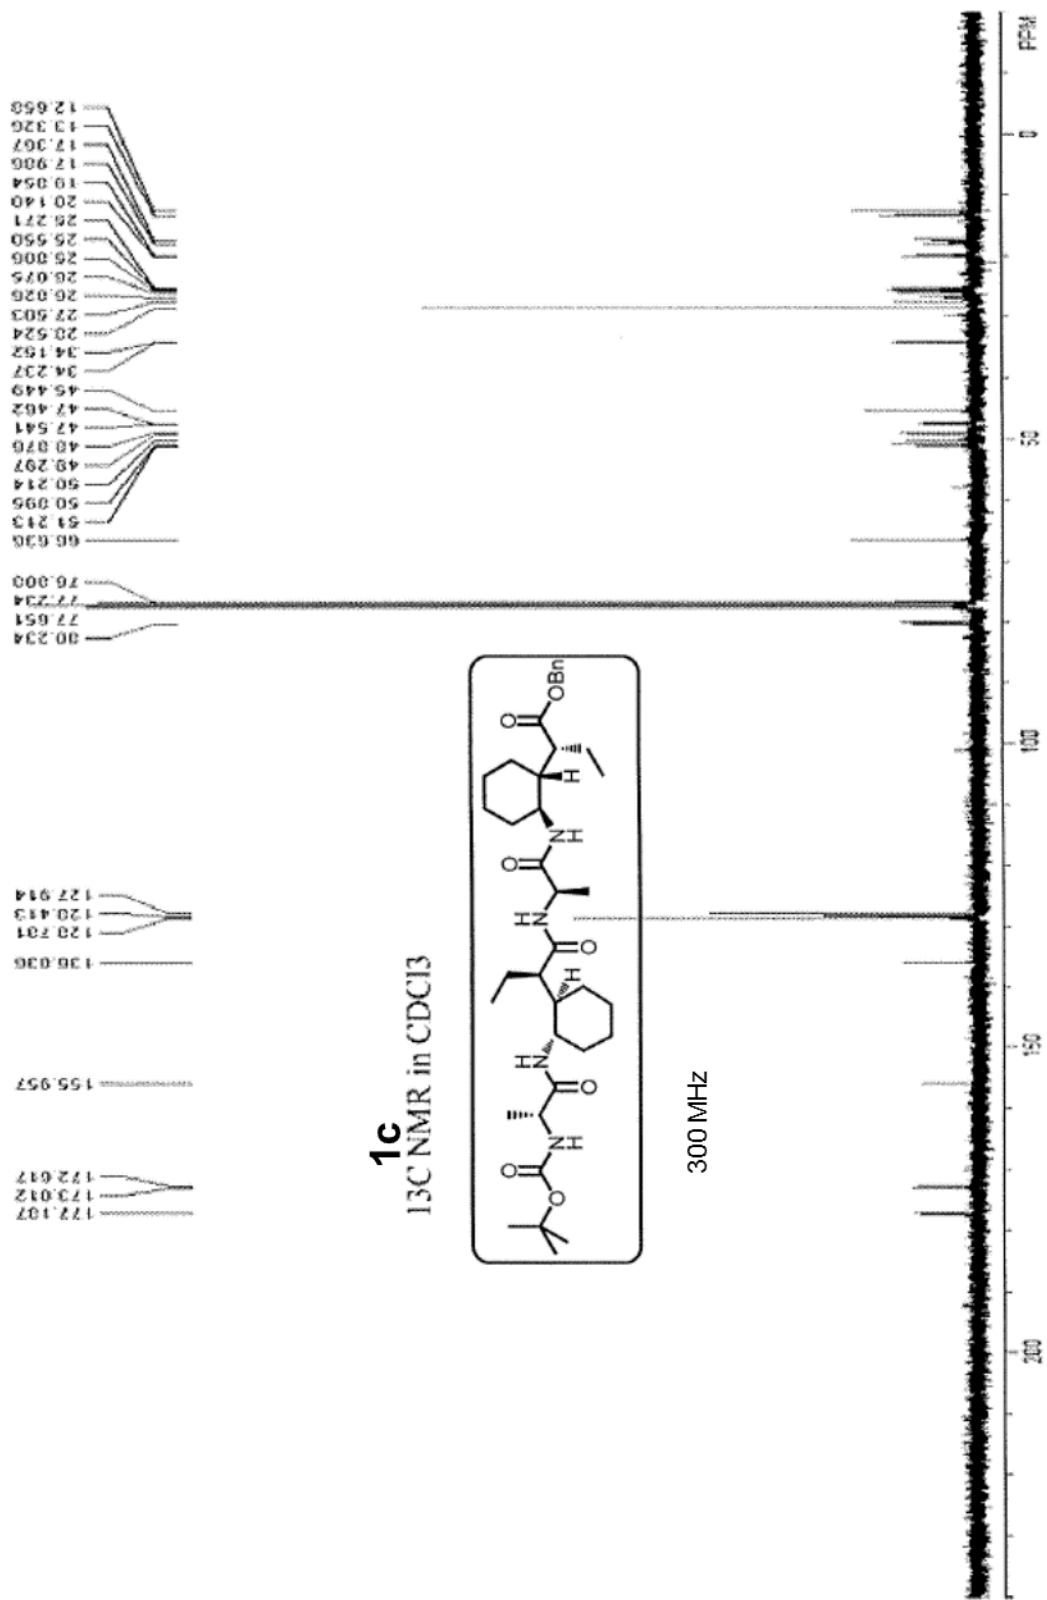







C1307261815\_BFF3-154\_CNMR.10.fid

Group Gellman

C13CPD32 CDCI3 /home/bfischer/callisto/bfischer\_55

CNMR in CDCl3  
500 MHz

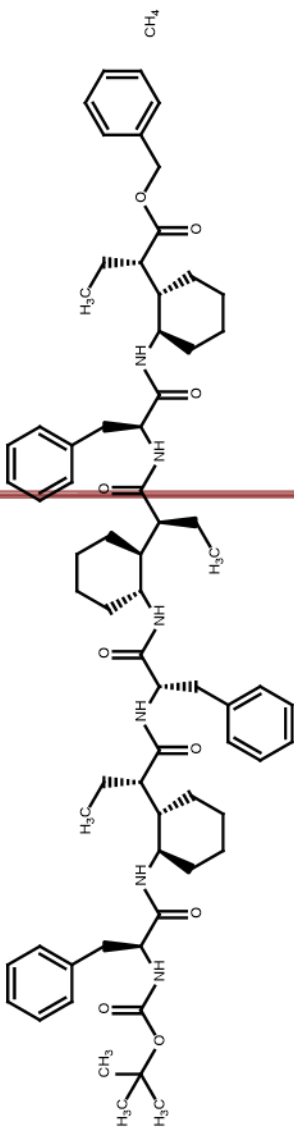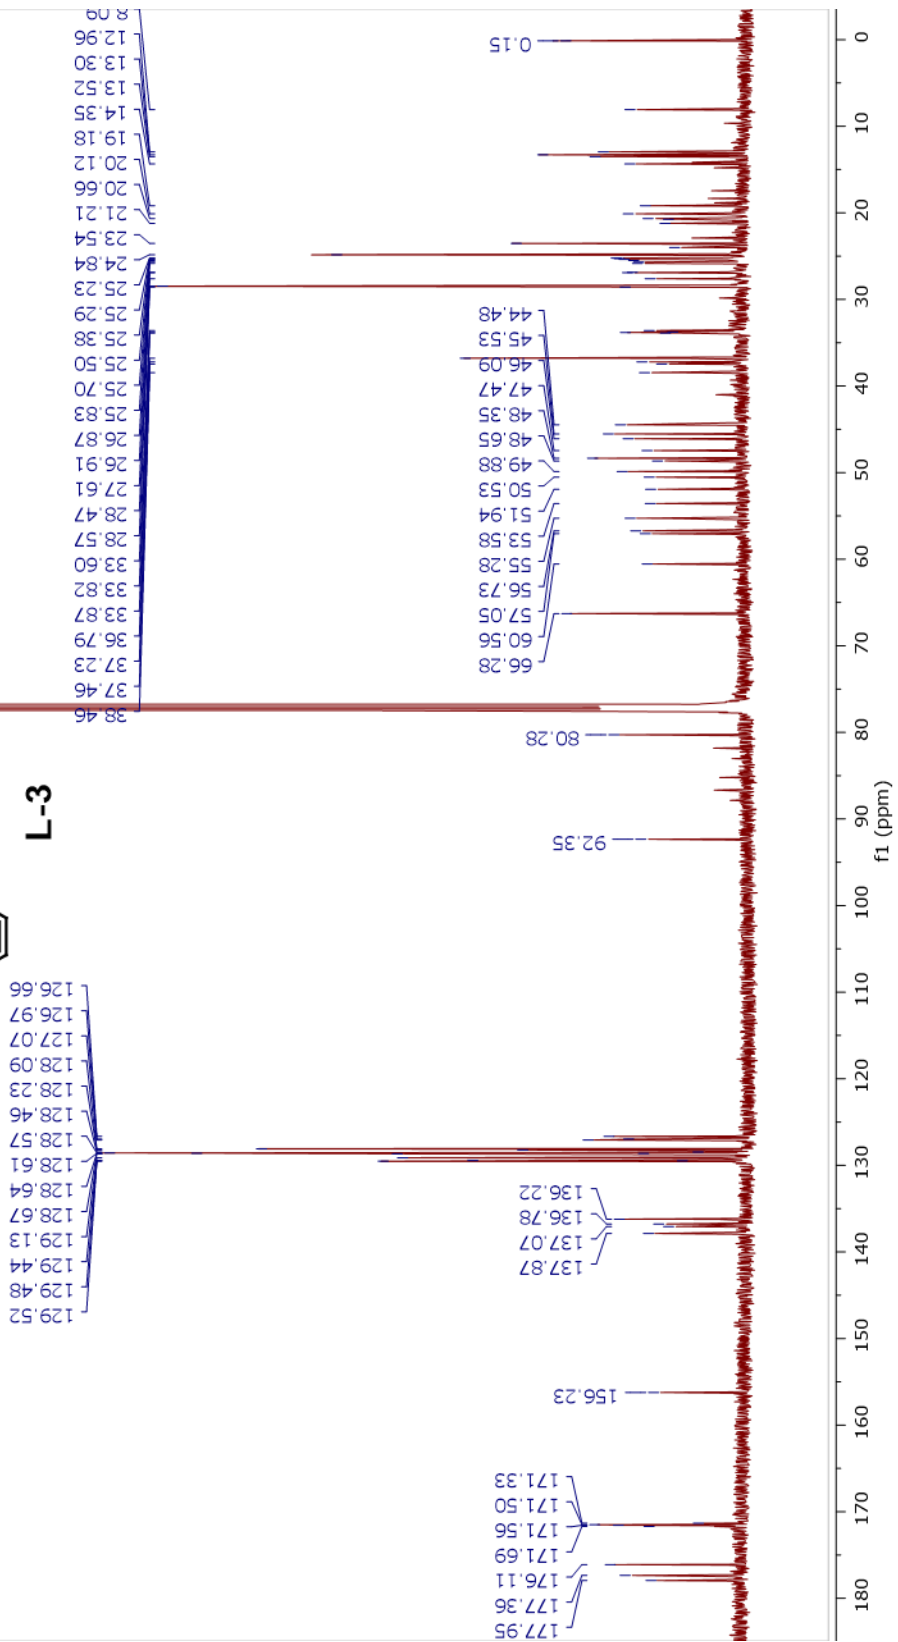

C1503091648\_BFF3-129.11.fid  
Group Gellman  
C13CPD32 CDCI3 /home/bfisher/callisto bfisher 41

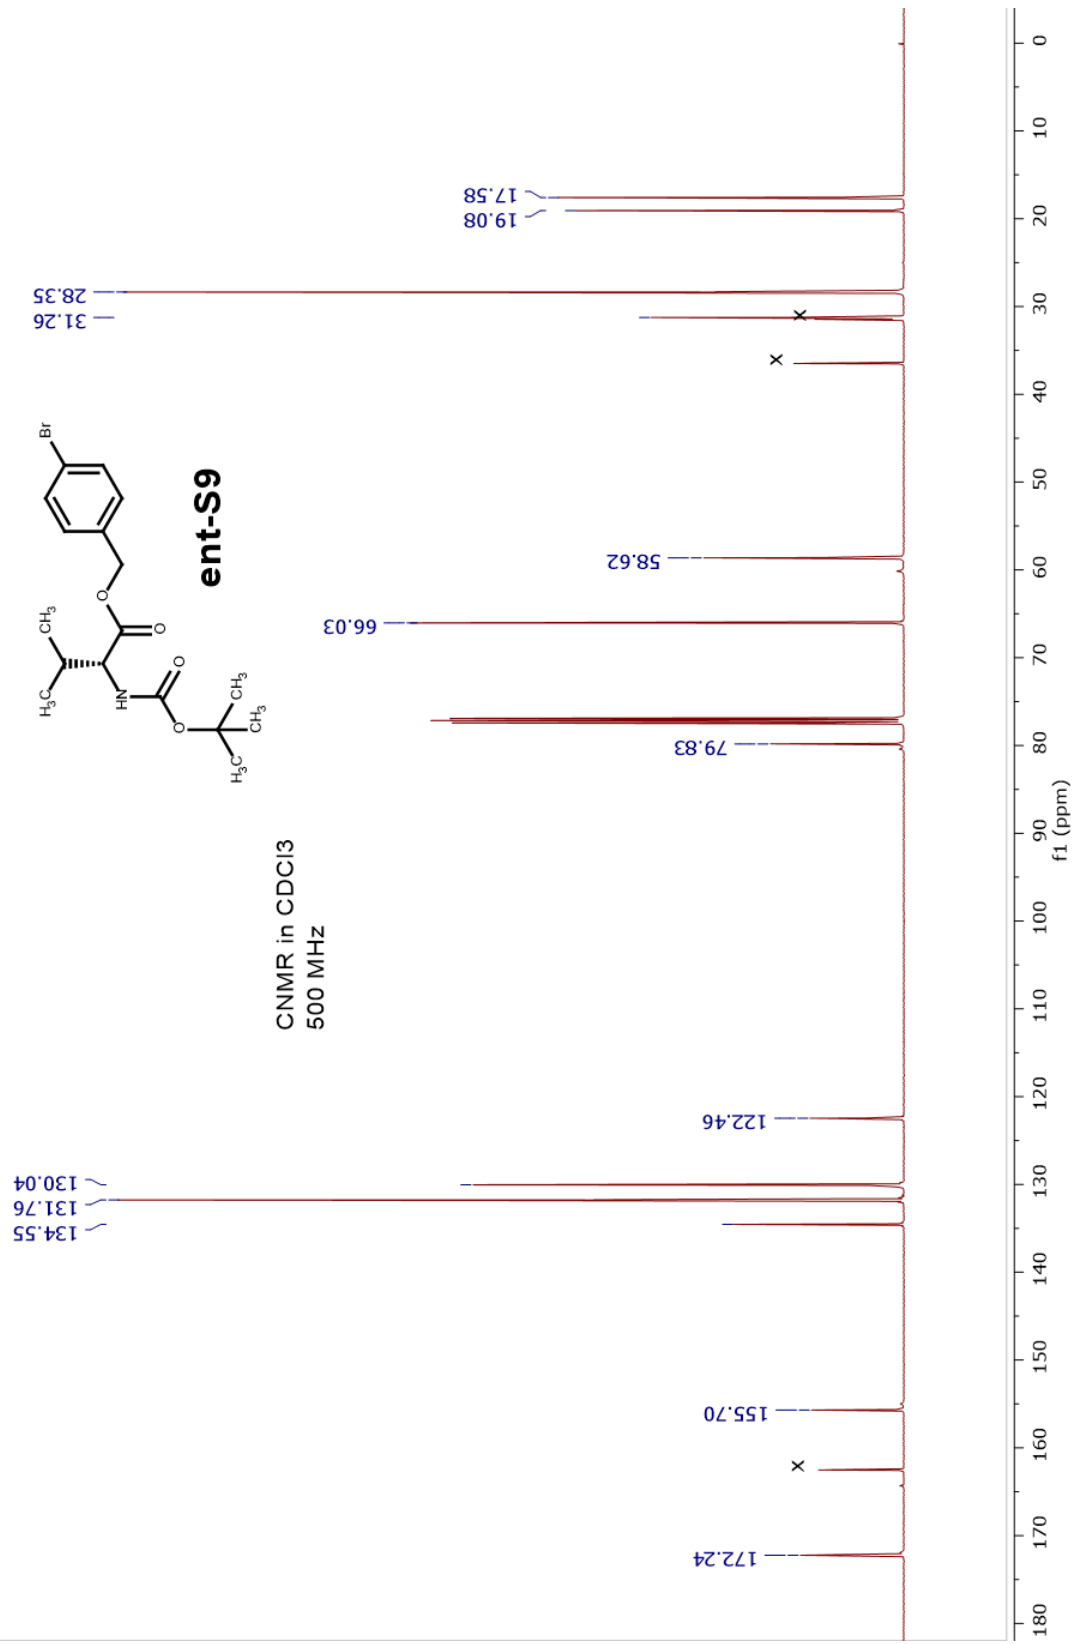





C1503091649\_BFF4-082.11.fid

Group Gellman

C13CPD32 CDCl3 /home/bfischer/canisto/fischer 42

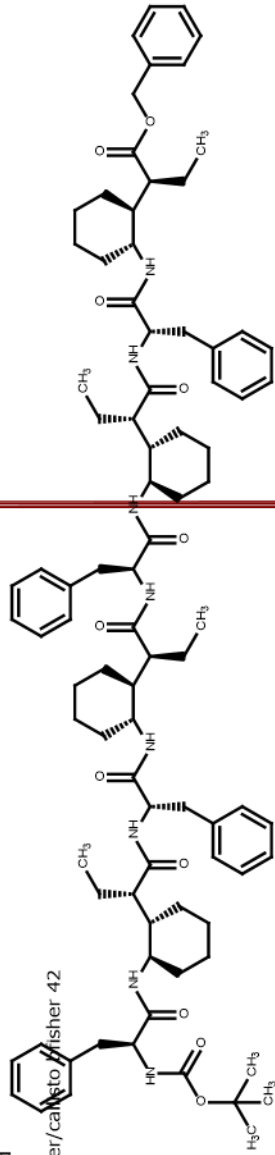

CNMR in CDCl<sub>3</sub>  
500 MHz

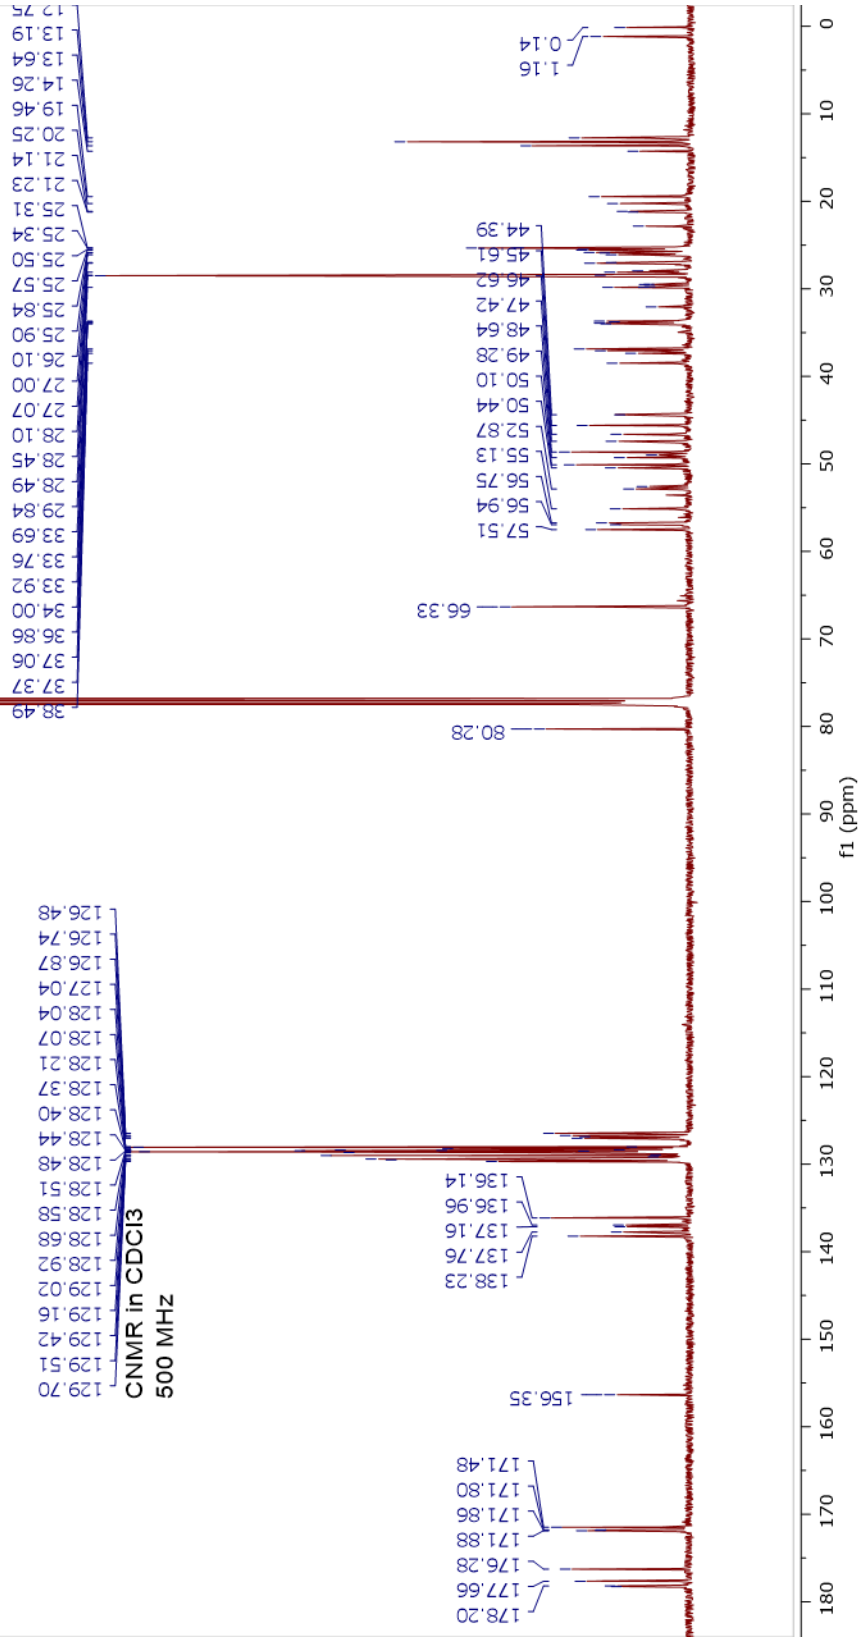

C1410241401\_BFF4-253.11.fid

Group Gellman

C13CPD32 CDCI3 /home/bfisher/callisto/bfisher 19

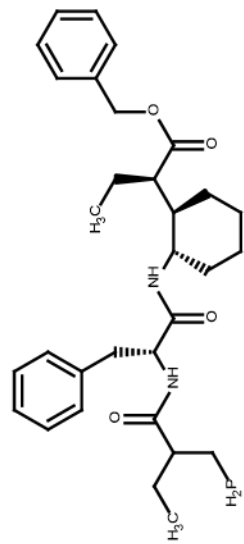

**6**

CNMR in CDCl<sub>3</sub>  
500 MHz

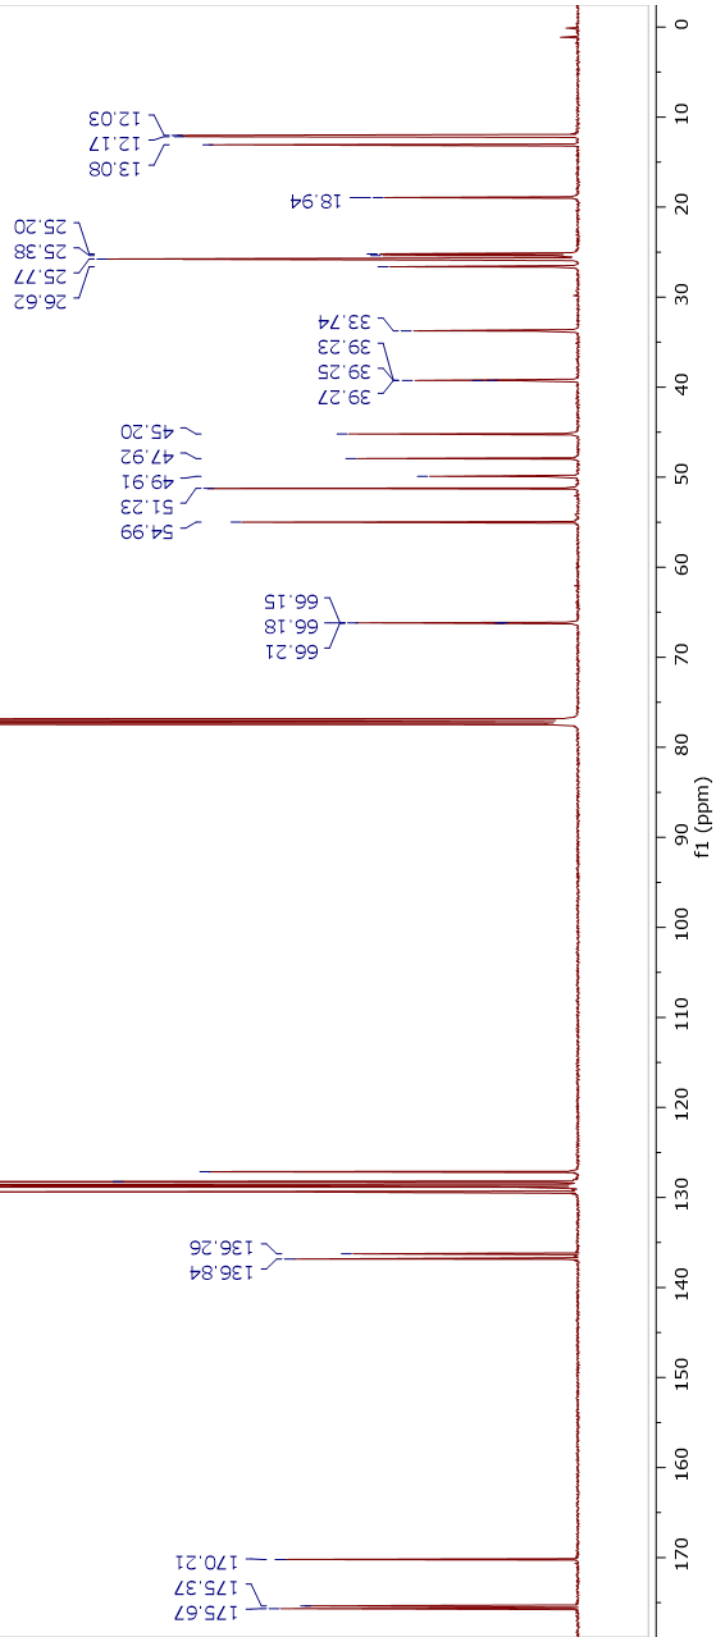

C1211171518\_BFF2-161\_C13.10.fid  
Group Gellman  
C13CPD32 CDCI3 /home/bfischer/callisto/bfischer\_3

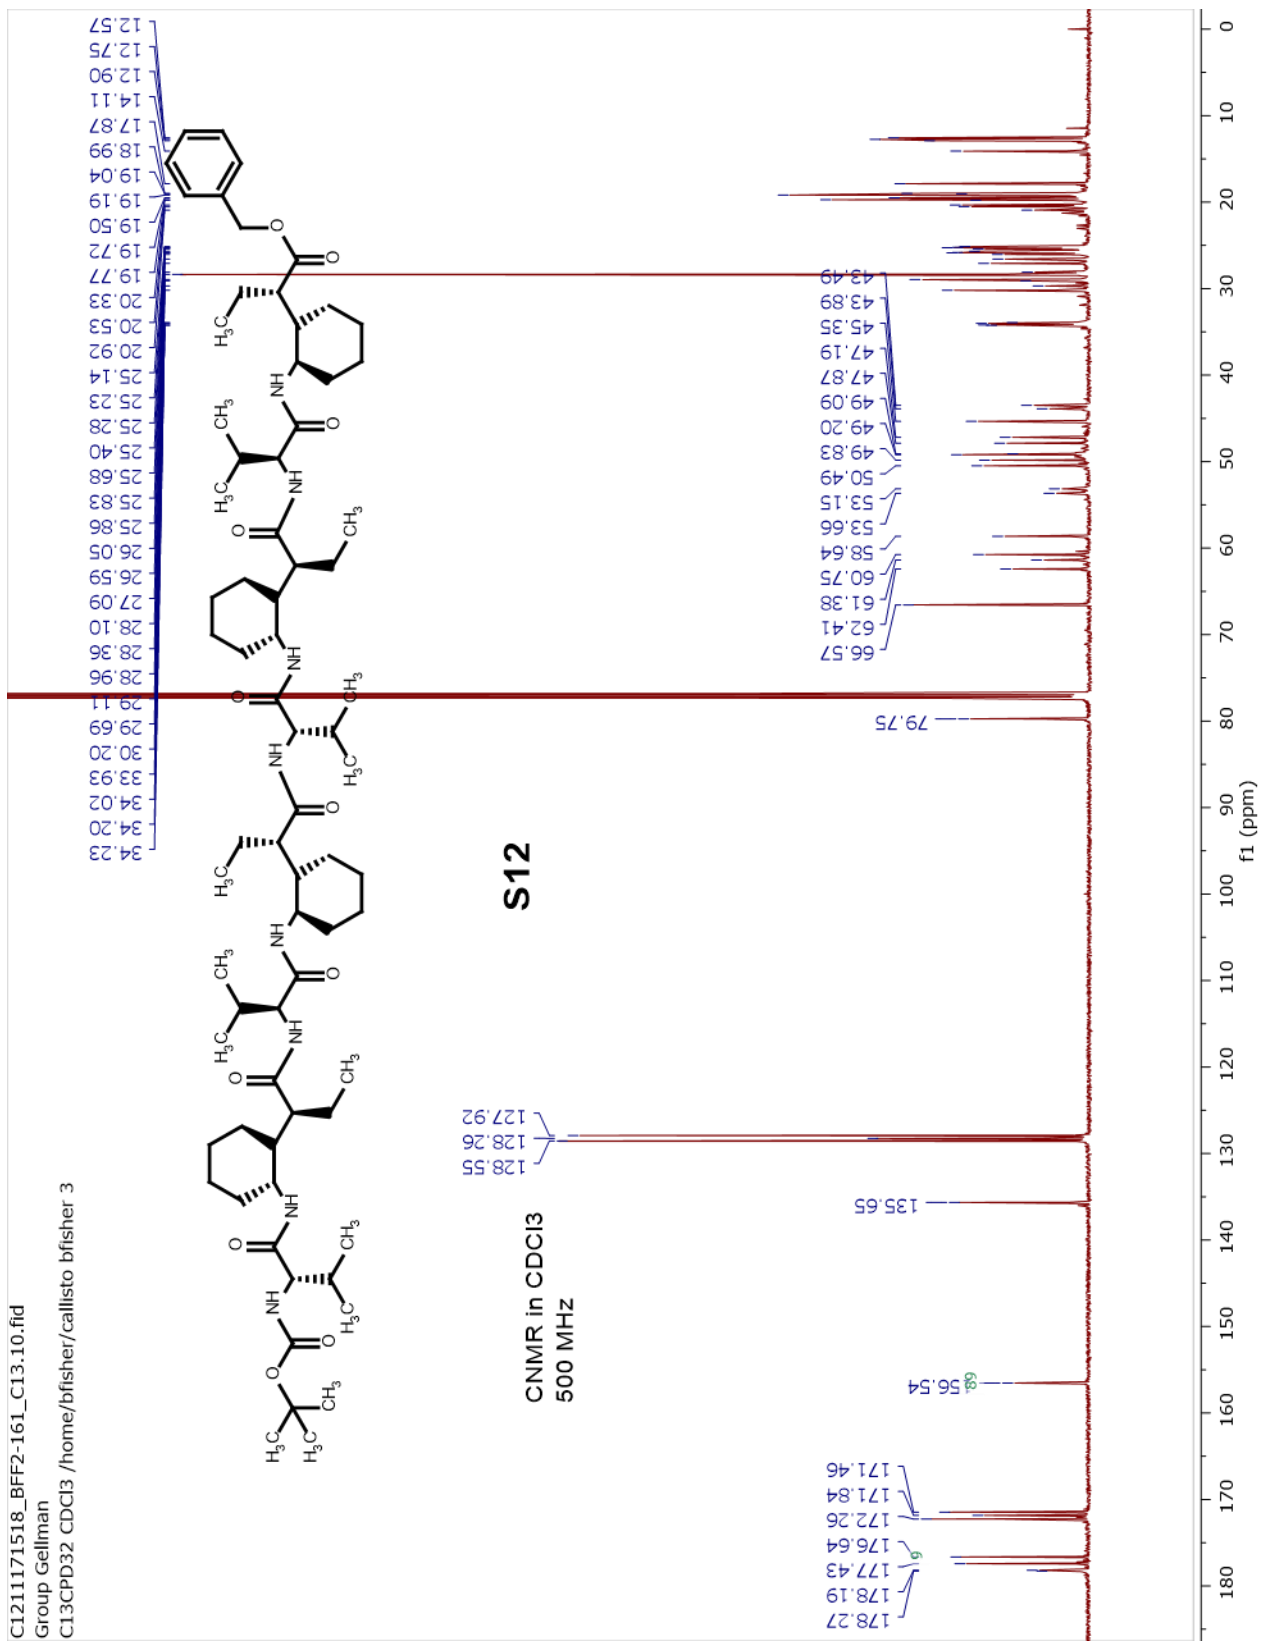

C1410281453\_BFF4-258\_1.11.fid

Group Gellman

C13CPD32 CDCI3 /home/bfisher/callisto/bfisher 41

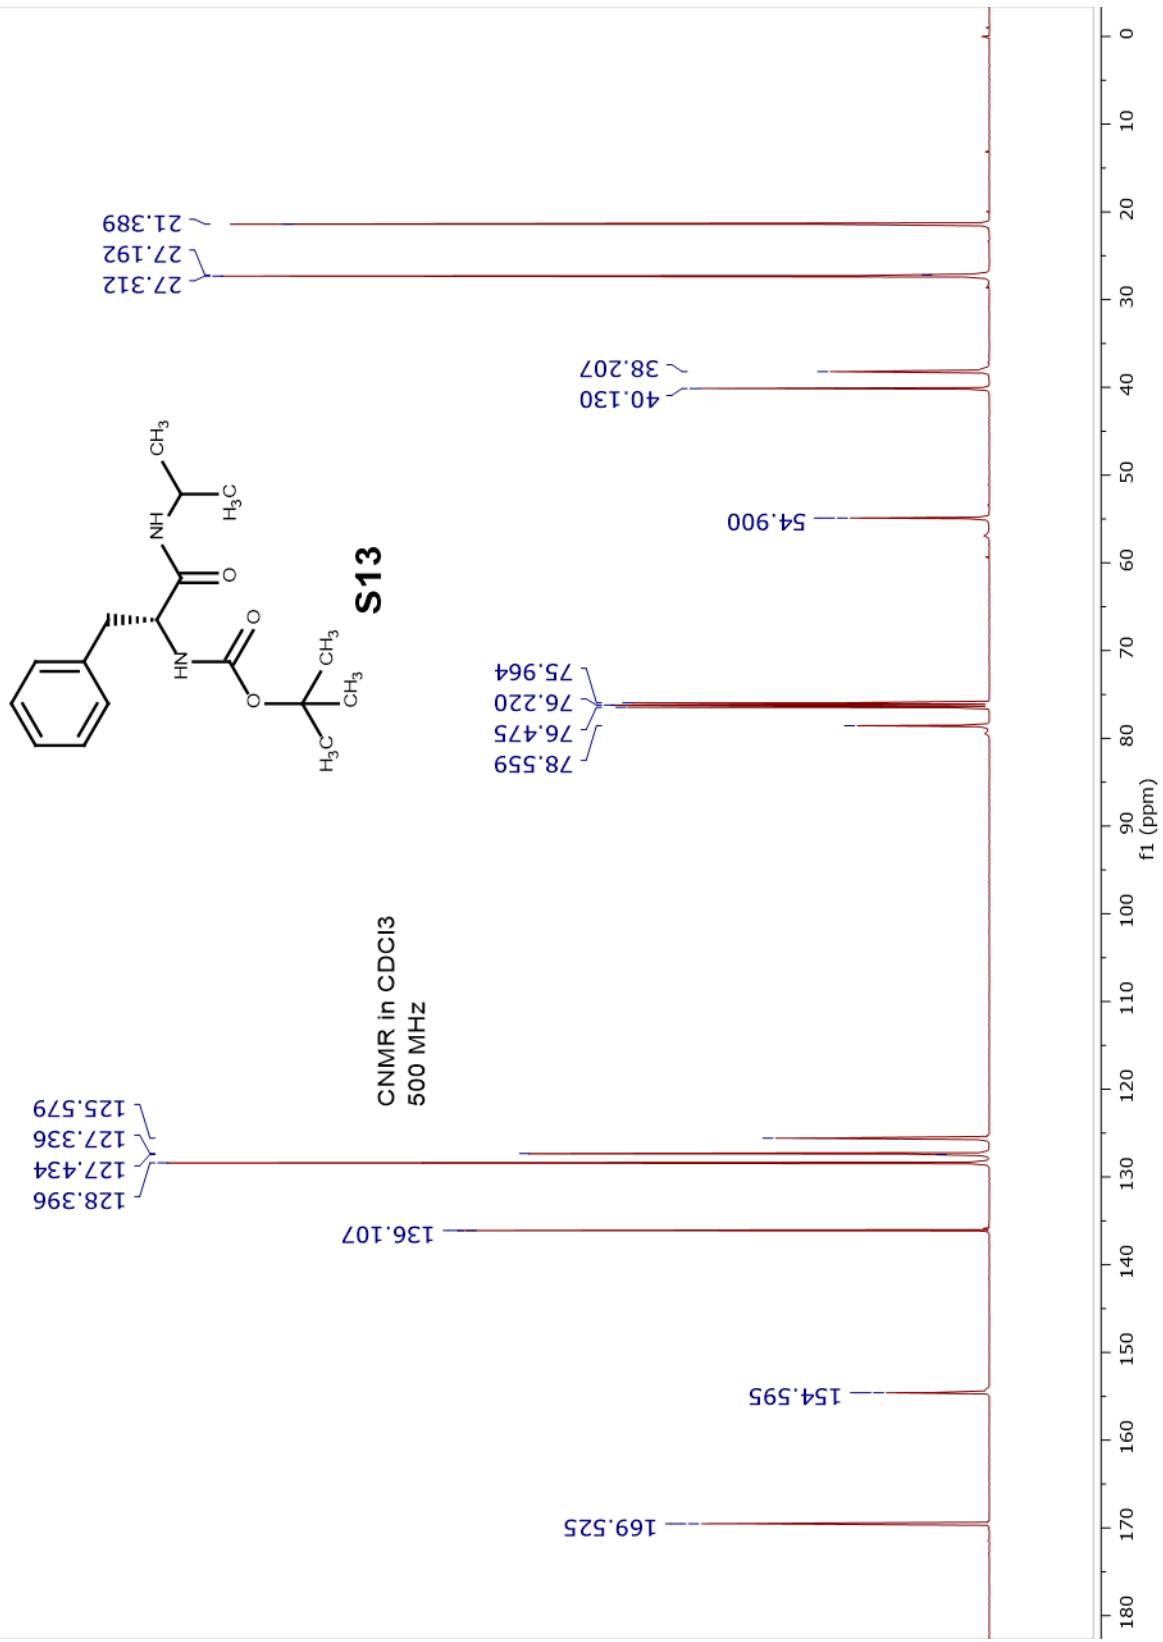

C1411030939\_BFF4-264.11.fid

Group Gellman

C13CPD32 CDCl3 /home/bfisher/callisto bfisher 29

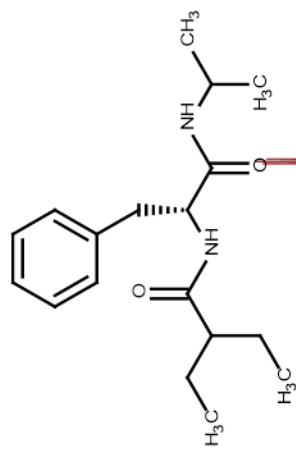

CNMR in CDCl<sub>3</sub>  
500 MHz

S14

129.417  
128.734  
127.001

137.106

170.019

175.911

54.549

51.222

41.502

38.667

25.876  
25.847  
22.621  
22.507

12.131  
11.976

1.149

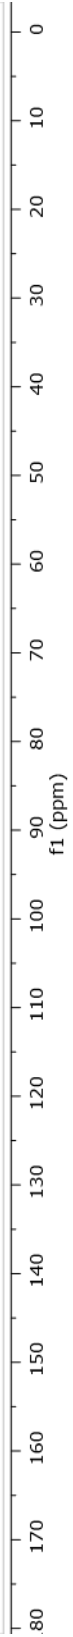

C1410301649\_BFF4-259\_CDCI3.11.fid

Group Gellman

C13CPD32 CDCI3 /home/bfisher/callisto/bfisher 29

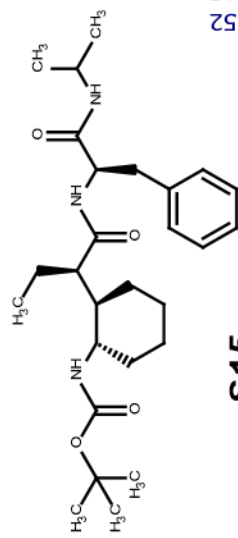

129.336  
128.372  
128.286  
126.527

CNMR in CDCl<sub>3</sub>  
500 MHz

137.055

155.530

170.456

79.506

55.853

41.085  
39.130

28.252  
28.115  
22.336  
22.311

0  
10  
20  
30  
40  
50  
60  
70  
80  
90  
100  
110  
120  
130  
140  
150  
160  
170

f1 (ppm)

### c. 2D-NMR Spectra

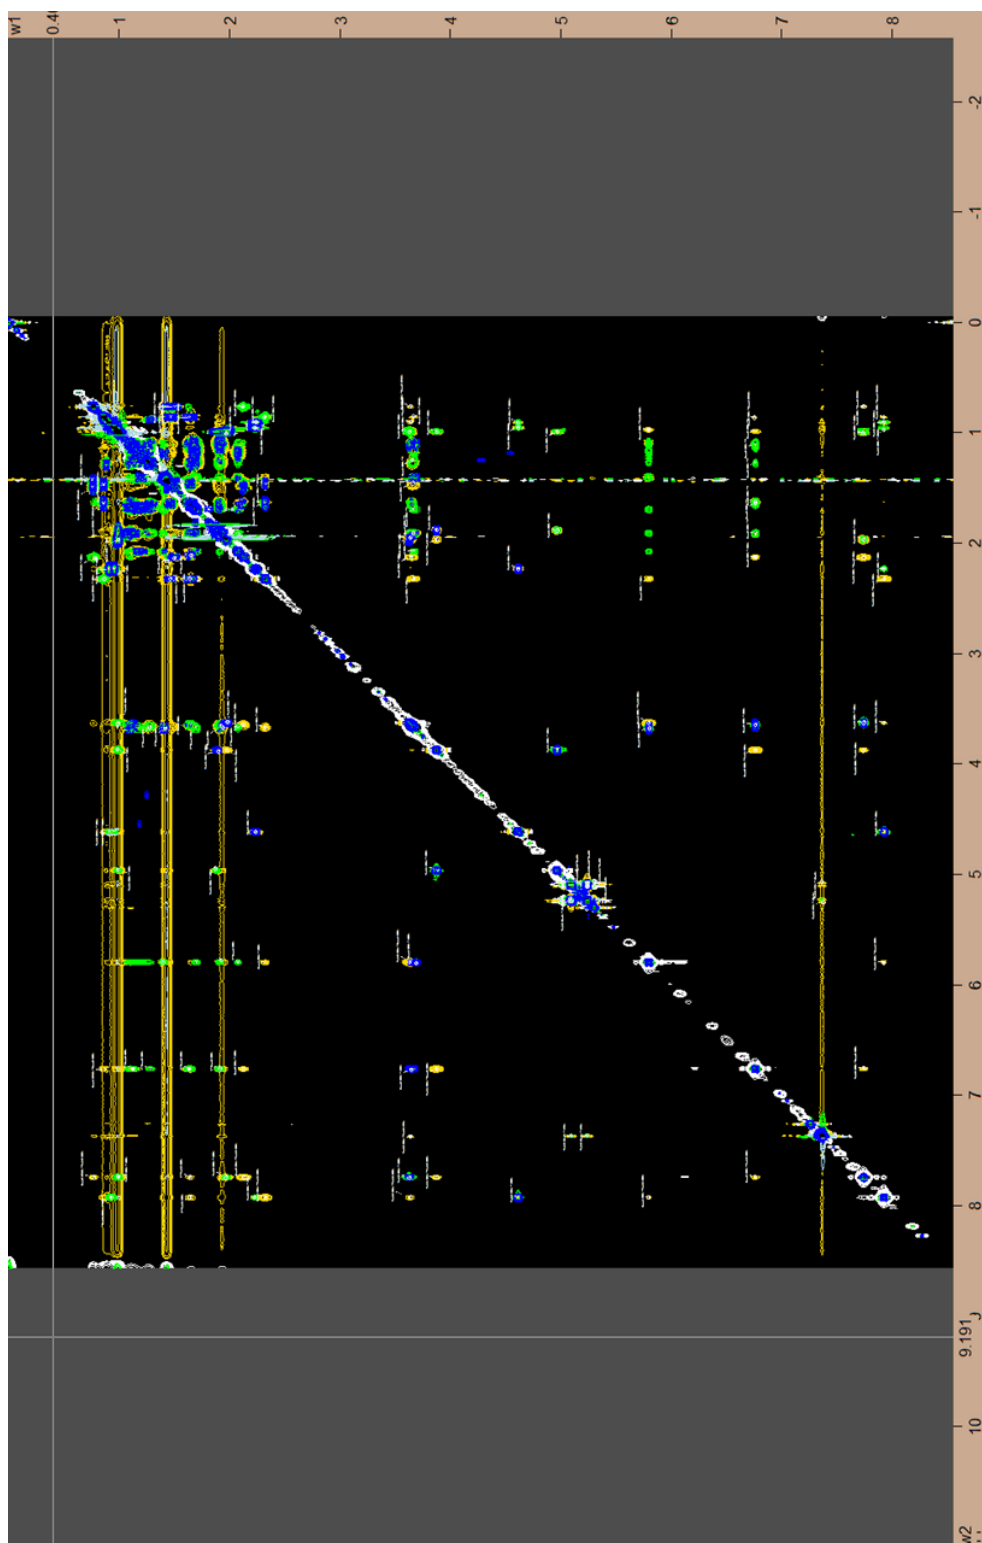

**Figure S14.** Overlay of 2D-NMR Spectra of **2a**. Blue is COSY, green is TOCSY, and gold/white is NOESY positive/negative.



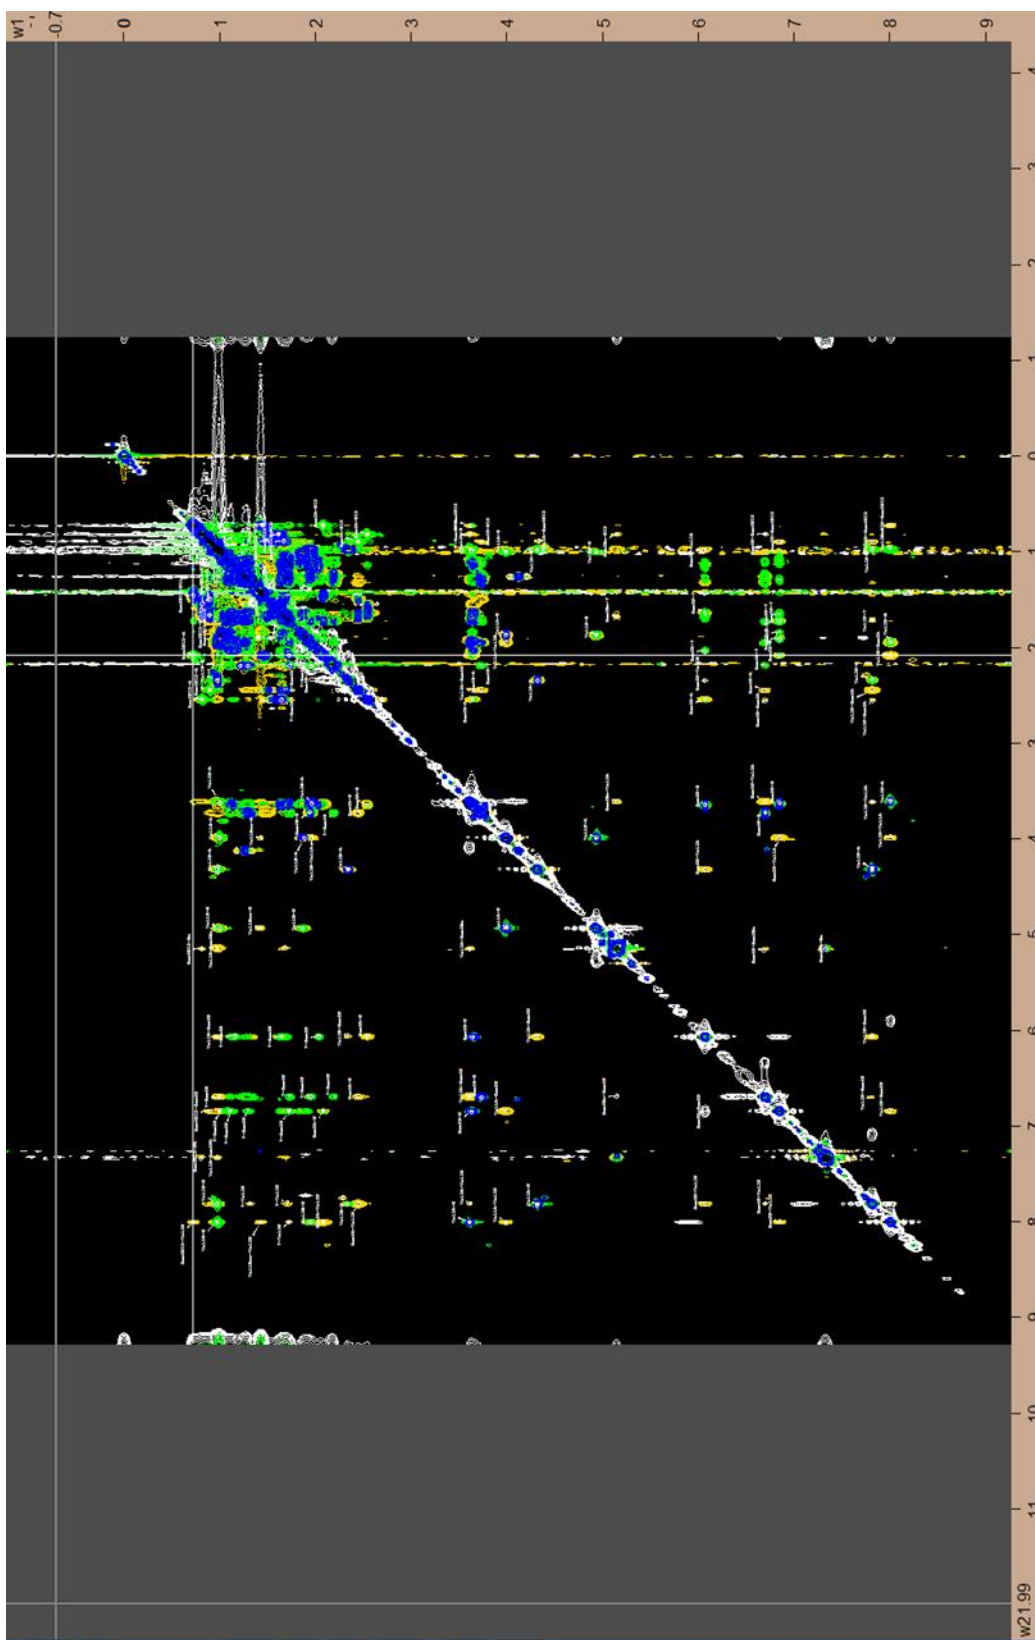

**Figure S15.** Overlay of 2D-NMR Spectra of **S11**. Blue is COSY, green is TOCSY, and gold/white is NOESY positive/negative.

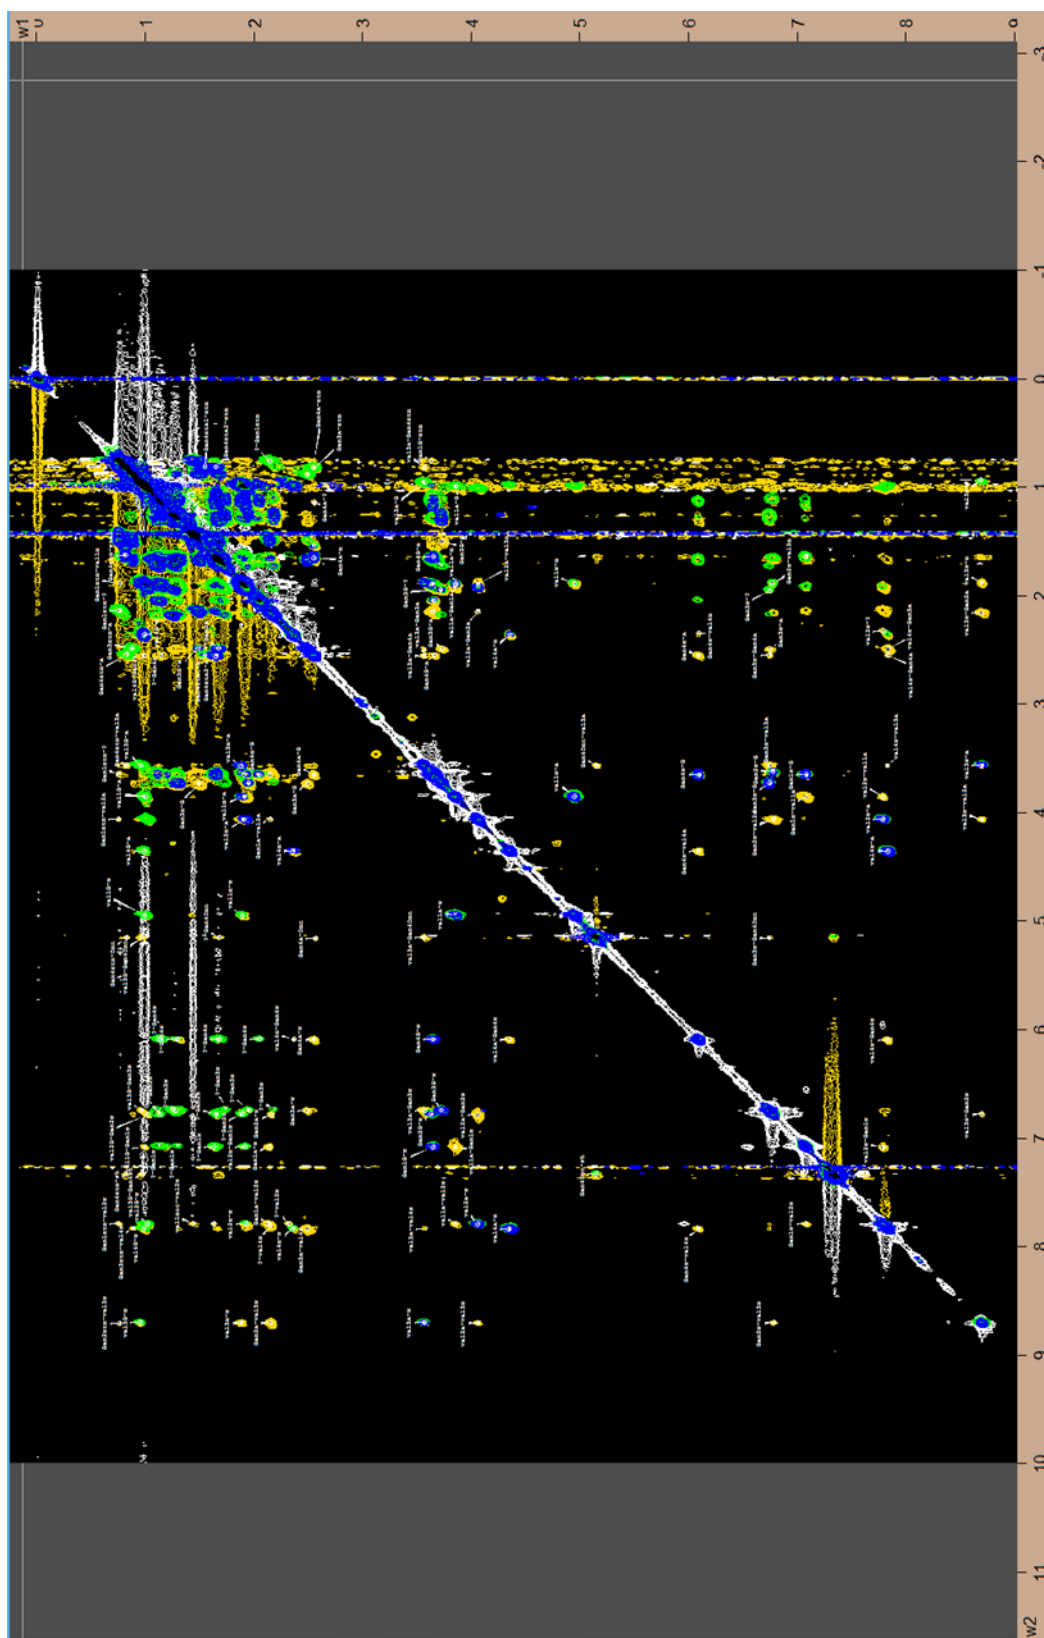

**Figure S16.** Overlay of 2D-NMR Spectra of **S12**. Blue is COSY, green is TOCSY, and gold/white is ROESY positive/negative.

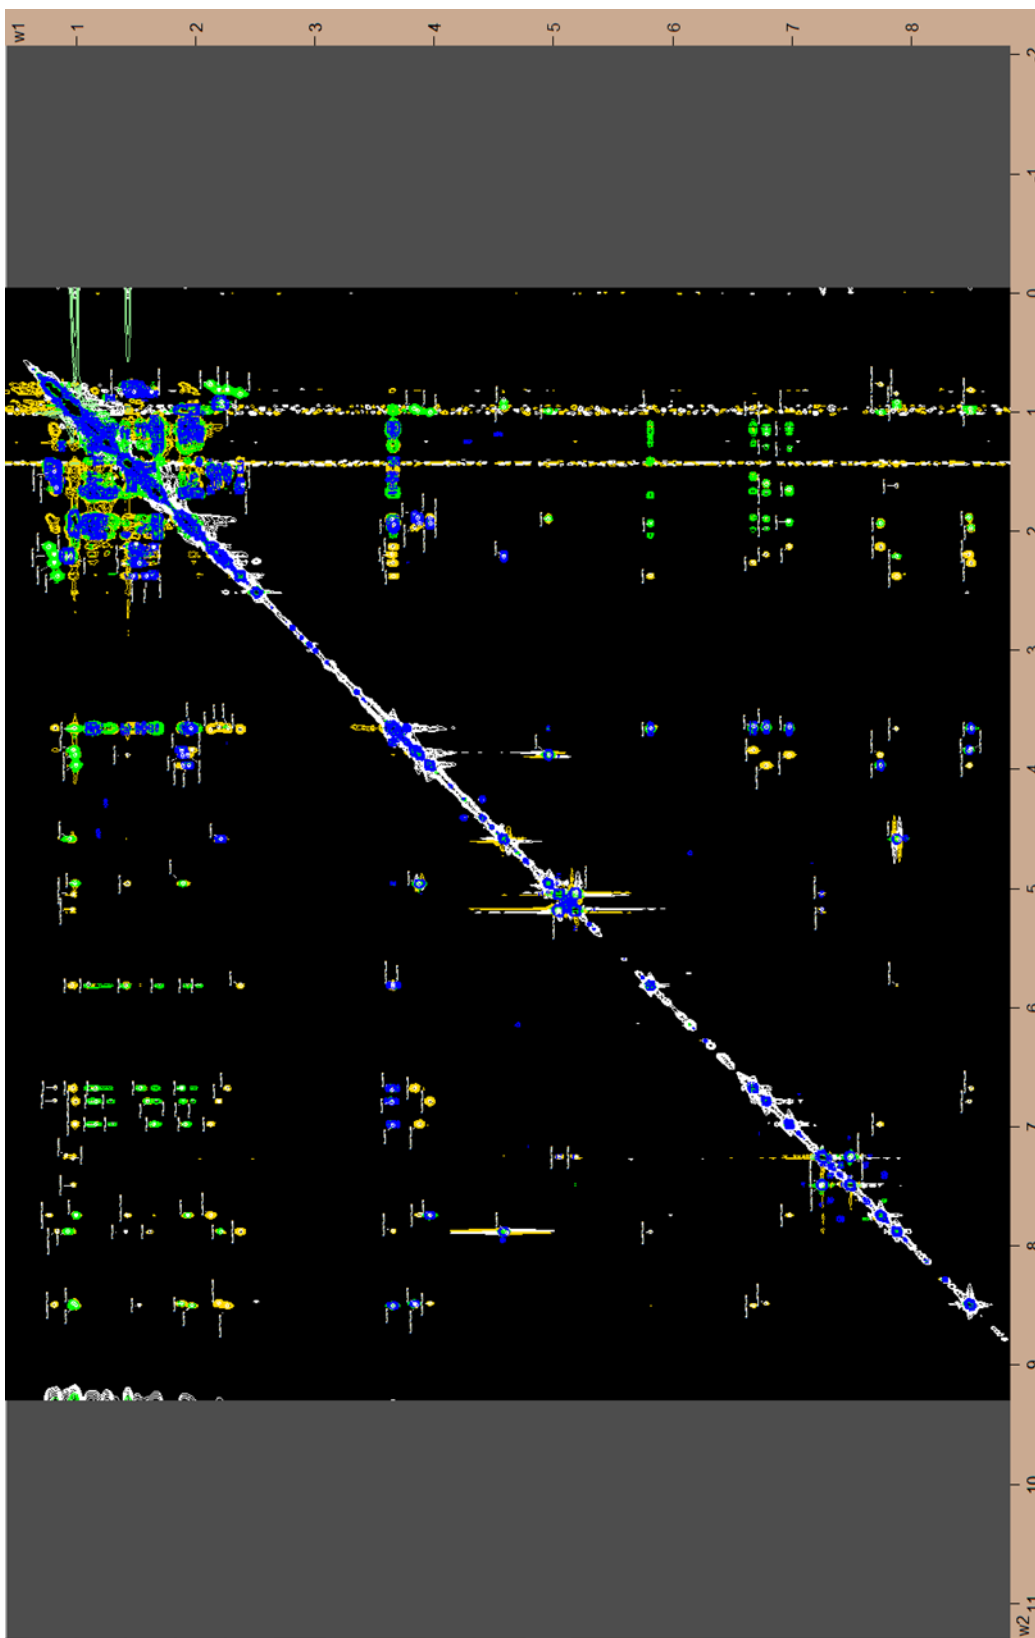

**Figure S17.** Overlay of 2D-NMR Spectra of **4**. Blue is COSY, green is TOCSY, and gold/white is ROESY positive/negative.

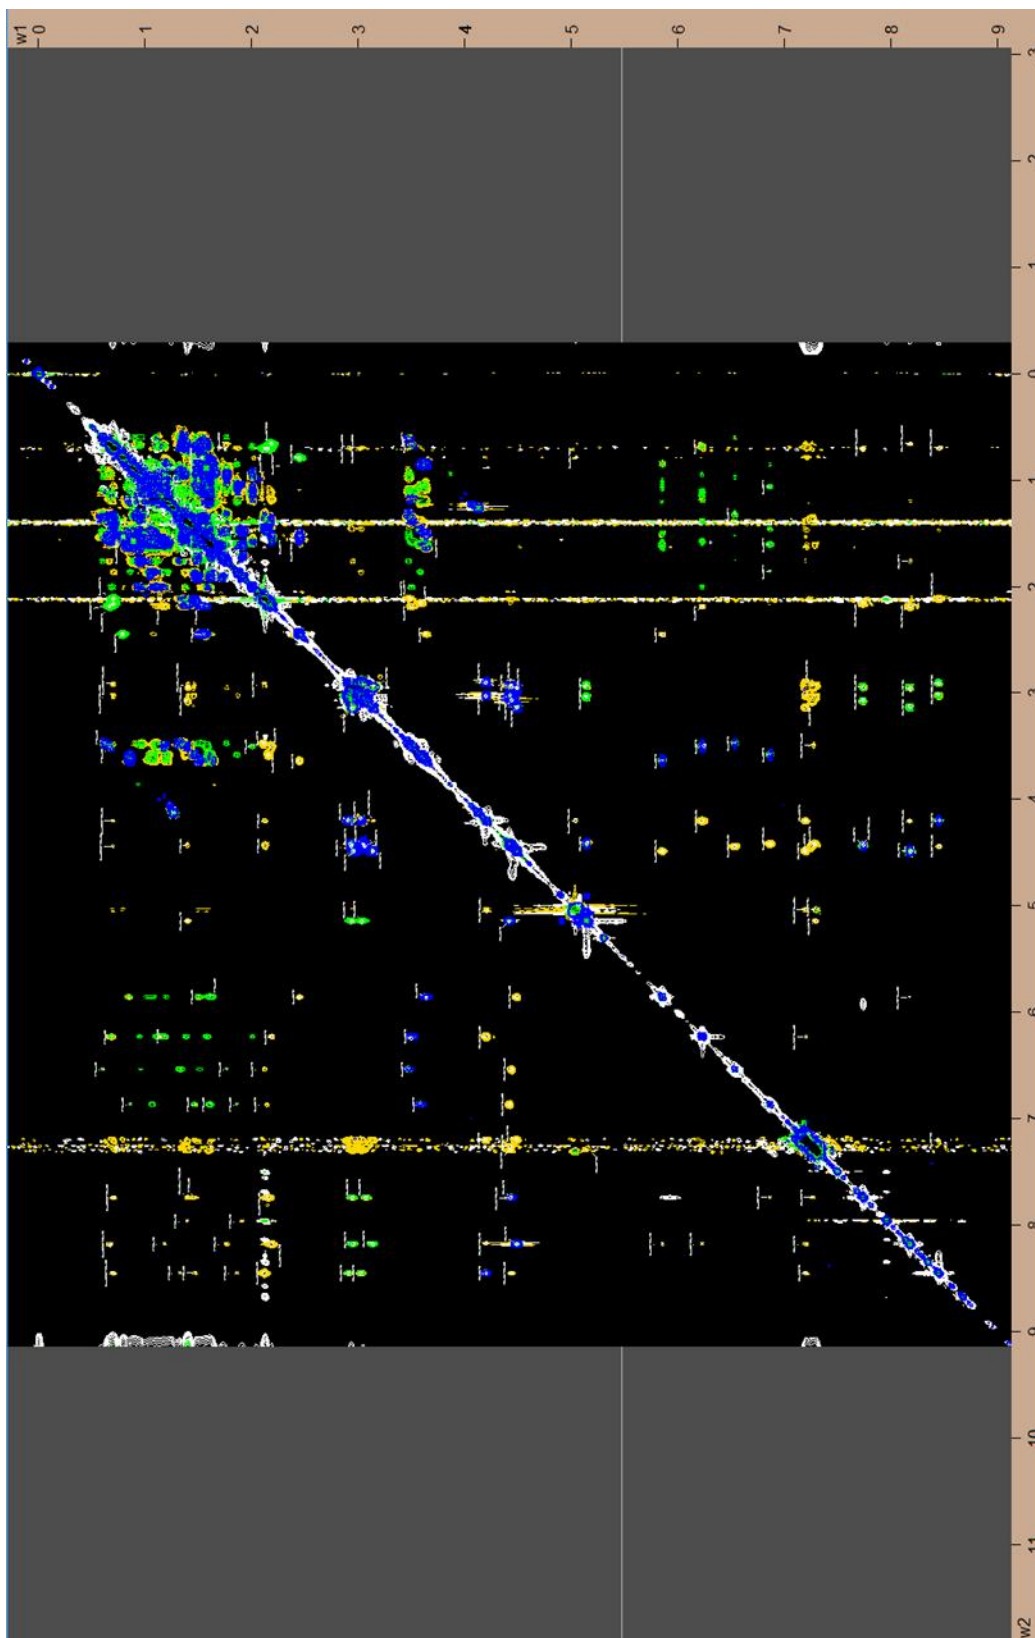

**Figure S18.** Overlay of 2D-NMR Spectra of **5**. Blue is COSY, green is TOCSY, and gold/white is ROESY positive/negative.

## XI. Crystallographic Data

Crystals grown by the slow evaporation method were done in loosely-capped 2 mL scintillation vials in solutions of 150  $\mu$ L to 1 mL solvent. Crystals grown by the vapor diffusion method were done by dissolving peptide in the strongly-solvating solvent in a 2 mL scintillation vial and placing this vial into a 15 mL scintillation vial containing volatile precipitating solvent. This larger vial was tightly capped. Crystals grown at 4°C were grown inside a chemical refrigerator. Racemic crystallization was done by transferring approximately equal amounts of each peptide enantiomer into a 2 mL scintillation vial. Each crystallized racemate formed a centrosymmetric space group.

**Table S19.** Crystallization setups

| Crystal | Method                    | Solvent system                          | Temperature |
|---------|---------------------------|-----------------------------------------|-------------|
| 1a      | Racemic; slow evaporation | 1:6 CHCl <sub>3</sub> :heptane          | rt          |
| 1b      | Slow evaporation          | EtOAc:heptane:MeOH                      | rt          |
| 1c      | Slow evaporation          | Et <sub>2</sub> O:heptane               | rt          |
| 2a      | Slow evaporation          | 1:8 CHCl <sub>3</sub> :heptane          | 4°C         |
| 2b      | Slow evaporation          | 1:3 EtOH:heptane                        | rt          |
| 3a      | Racemic; vapor diffusion  | pentane into 3:1 CHCl <sub>3</sub> :DCE | 4°C         |
| 3b      | Racemic; vapor diffusion  | pentane into CHCl <sub>3</sub>          | 4°C         |

### Crystallographic Experimental Section for Compound *rac*-1a

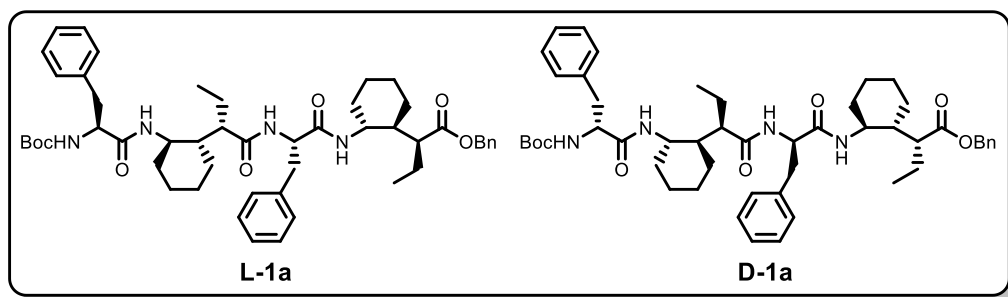

### Data Collection

A colorless crystal with approximate dimensions  $0.162 \times 0.119 \times 0.091$  mm<sup>3</sup> was selected under oil under ambient conditions and attached to the tip of a MiTeGen MicroMount<sup>®</sup>. The crystal was mounted in a stream of cold nitrogen at 100(1) K and centered in the X-ray beam by using a video camera.

The crystal evaluation and data collection were performed on a Bruker Quazar SMART APEXII diffractometer with Mo K $\alpha$  ( $\lambda = 0.71073$  Å) radiation and the diffractometer to crystal distance of 4.96 cm.

The initial cell constants were obtained from three series of  $\omega$  scans at different starting angles. Each series consisted of 12 frames collected at intervals of 0.5° in a 6° range about  $\omega$  with the exposure time of 20 seconds per frame. The reflections were successfully indexed by an automated indexing routine built in the APEXII program suite. The final cell constants were calculated from a set of 9493 strong reflections from the actual data collection.

The data were collected by using the full sphere data collection routine to survey the reciprocal space to the extent of a full sphere to a resolution of 0.70 Å. A total of 22130 data were harvested by collecting 5 sets of frames with 0.5° scans in  $\omega$  and  $\phi$  with exposure times of 90 sec per frame. These highly redundant datasets were corrected for Lorentz and polarization effects. The absorption correction was based on fitting a function to the empirical transmission surface as sampled by multiple equivalent measurements. [1]

## Structure Solution and Refinement

The systematic absences in the diffraction data were consistent for the space groups  $P\bar{1}$  and  $P1$ . The  $E$ -statistics strongly suggested the centrosymmetric space group  $P\bar{1}$  that yielded chemically reasonable and computationally stable results of refinement [2-4].

A successful solution by the direct methods provided most non-hydrogen atoms from the  $E$ -map. The remaining non-hydrogen atoms were located in an alternating series of least-squares cycles and difference Fourier maps. All non-hydrogen atoms were refined with anisotropic displacement coefficients unless otherwise specified. All aromatic and aliphatic hydrogen atoms were included in the structure factor calculation at idealized positions and were allowed to ride on the neighboring atoms with relative isotropic displacement coefficients.

The structure is racemic.

The Ph ring at carbon C7 is disordered over two positions with the major component present 91.9(4)% of the time. The minor component was refined isotropically with an idealized geometry.

There is also 0.8161(16) molecule of solvate chloroform and 0.1839(16) molecules of heptane per foldamer in the crystals. The solvent molecules share the same site resulting in compositional disorder. The heptane was refined isotropically with constraints and restraints.

The final least-squares refinement of 640 parameters against 15641 data resulted in residuals  $R$  (based on  $F^2$  for  $I \geq 2\sigma$ ) and  $wR$  (based on  $F^2$  for all data) of 0.0546 and 0.1433, respectively. The final difference Fourier map was featureless.

## Summary

**Crystal Data** for  $C_{52.1}H_{71.8}Cl_{2.4}N_4O_7$  ( $M = 952.90$ ): triclinic, space group  $P\bar{1}$  (no. 2),  $a = 11.5447(4)$  Å,  $b = 14.2478(5)$  Å,  $c = 17.4006(6)$  Å,  $\alpha = 96.227(2)^\circ$ ,  $\beta = 108.4600(18)^\circ$ ,  $\gamma = 105.9040(18)^\circ$ ,  $V = 2550.47(16)$  Å<sup>3</sup>,  $Z = 2$ ,  $T = 100.0$  K,  $\mu(\text{MoK}\alpha) = 0.204$  mm<sup>-1</sup>,  $D_{\text{calc}} = 1.241$  g/mm<sup>3</sup>, 62220 reflections measured ( $2.526 \leq 2\theta \leq 61.23$ ), 15641 unique ( $R_{\text{int}} = 0.0557$ ,  $R_{\text{sigma}} = 0.0599$ ) which were used in all calculations. The final  $R_1$  was 0.0546 ( $I > 2\sigma(I)$ ) and  $wR_2$  was 0.1433 (all data).

## References

- [1] Bruker-AXS. (2007-2014) APEX2 (Ver. 2014.1-1), SADABS (2012-1), and SAINT+ (Ver. 8.32A) Software Reference Manuals. Bruker-AXS, Madison, Wisconsin, USA.
- [2] Sheldrick, G. M. (2008) SHELXL. *Acta Cryst.* **A64**, 112-122.
- [3] Dolomanov, O.V.; Bourhis, L.J.; Gildea, R.J.; Howard, J.A.K.; Puschmann, H. "OLEX2: a complete structure solution, refinement and analysis program". *J. Appl. Cryst.* (2009) **42**, 339-341.
- [4] Guzei, I.A. (2013). Internal laboratory computer programs Gn.

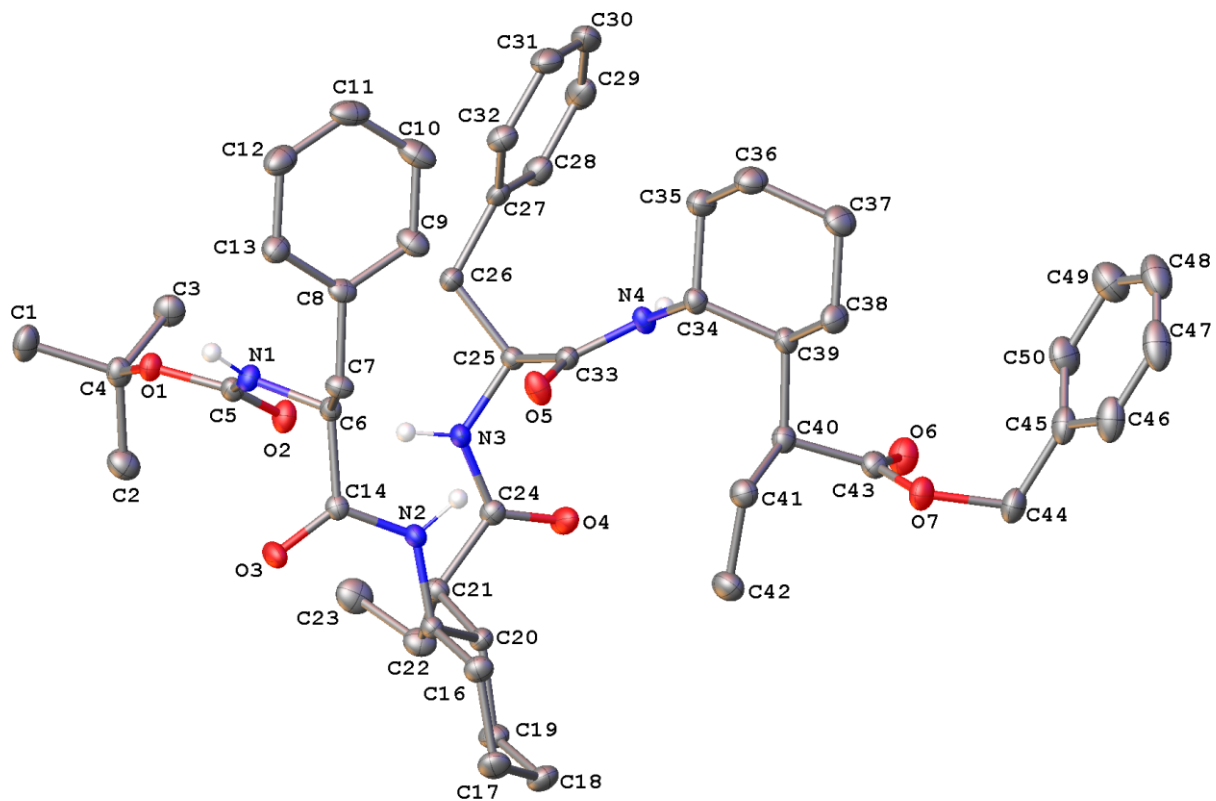

**Figure S19.** A molecular drawing of the foldamer shown with 50% probability ellipsoids. The disordered atoms, solvent molecules, and non-amido H atoms are omitted.

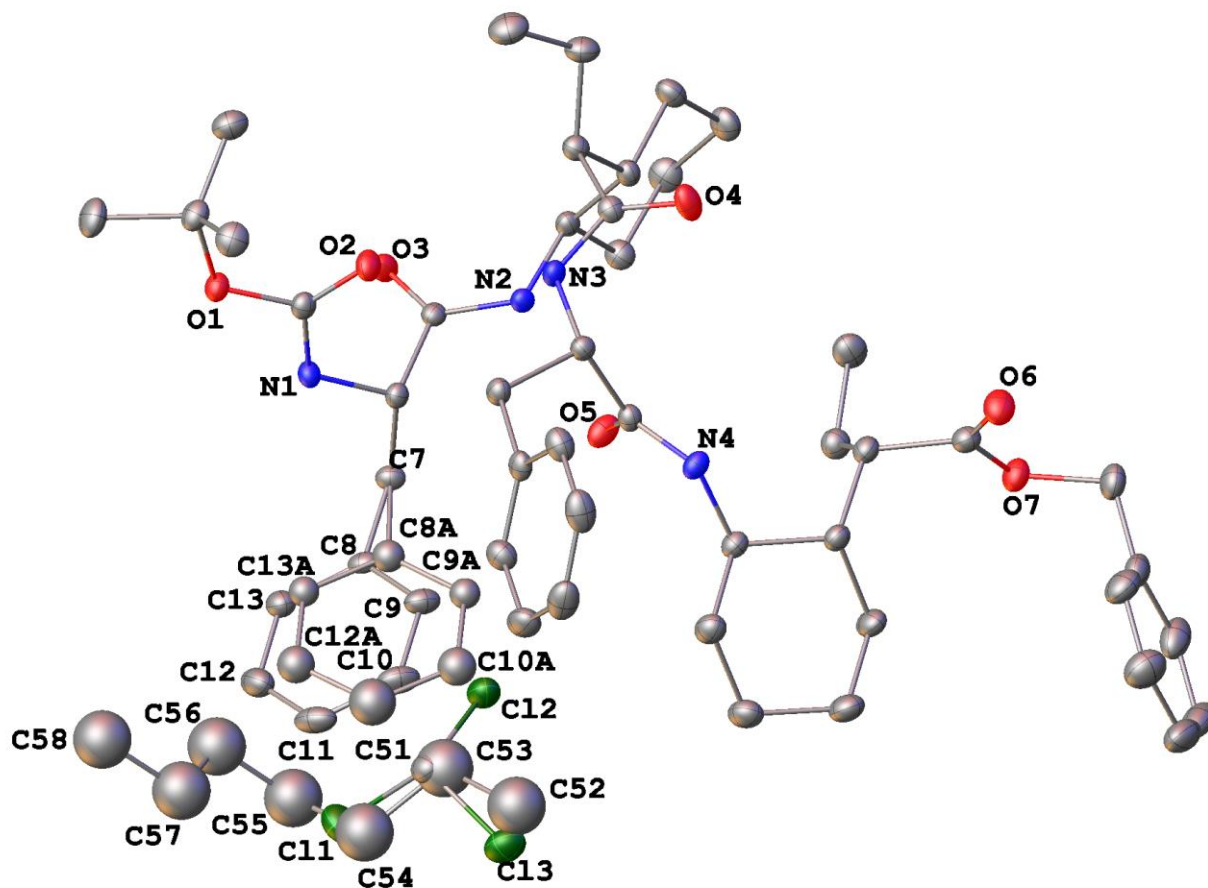

**Figure S20.** A molecular drawing of Gellman155 shown with 50% probability ellipsoids. The disordered atoms, solvent molecules, and N and O atoms are labeled. All H atoms are omitted. The C51 chloroform and C52-C58 heptane share the same site. Isotropically refined atoms are shown with spheres, anisotropic with ellipsoids.



| <b>Table S20.</b> Crystal data and structure refinement for gellman155. |                                                                                                                               |
|-------------------------------------------------------------------------|-------------------------------------------------------------------------------------------------------------------------------|
| <b>Identification code</b>                                              | gellman155                                                                                                                    |
| <b>Empirical formula</b>                                                | C <sub>50</sub> H <sub>68</sub> N <sub>4</sub> O <sub>7</sub> ·0.82(CHCl <sub>3</sub> )·0.18(C <sub>7</sub> H <sub>16</sub> ) |
| <b>Formula weight</b>                                                   | 952.90                                                                                                                        |
| <b>Temperature/K</b>                                                    | 100.0                                                                                                                         |
| <b>Crystal system</b>                                                   | triclinic                                                                                                                     |
| <b>Space group</b>                                                      | P $\bar{1}$                                                                                                                   |
| <b>a/Å</b>                                                              | 11.5447(4)                                                                                                                    |
| <b>b/Å</b>                                                              | 14.2478(5)                                                                                                                    |
| <b>c/Å</b>                                                              | 17.4006(6)                                                                                                                    |
| <b><math>\alpha</math>/°</b>                                            | 96.227(2)                                                                                                                     |
| <b><math>\beta</math>/°</b>                                             | 108.4600(18)                                                                                                                  |
| <b><math>\gamma</math>/°</b>                                            | 105.9040(18)                                                                                                                  |
| <b>Volume/Å<sup>3</sup></b>                                             | 2550.47(16)                                                                                                                   |
| <b>Z</b>                                                                | 2                                                                                                                             |
| <b><math>\rho_{\text{calc}}</math> mg/mm<sup>3</sup></b>                | 1.241                                                                                                                         |
| <b>m/mm<sup>-1</sup></b>                                                | 0.204                                                                                                                         |
| <b>F(000)</b>                                                           | 1020.0                                                                                                                        |
| <b>Crystal size/mm<sup>3</sup></b>                                      | 0.162 × 0.119 × 0.091                                                                                                         |
| <b>Radiation</b>                                                        | MoK $\alpha$ ( $\lambda$ = 0.71073)                                                                                           |
| <b>2<math>\theta</math> range for data collection</b>                   | 2.526 to 61.23°                                                                                                               |
| <b>Index ranges</b>                                                     | -16 ≤ h ≤ 16, -20 ≤ k ≤ 20, -24 ≤ l ≤ 24                                                                                      |
| <b>Reflections collected</b>                                            | 62220                                                                                                                         |
| <b>Independent reflections</b>                                          | 15641 [R <sub>int</sub> = 0.0557, R <sub>sigma</sub> = 0.0599]                                                                |
| <b>Data/restraints/parameters</b>                                       | 15641/19/640                                                                                                                  |
| <b>Goodness-of-fit on F<sup>2</sup></b>                                 | 1.020                                                                                                                         |
| <b>Final R indexes [I ≥ 2<math>\sigma</math> (I)]</b>                   | R <sub>1</sub> = 0.0546, wR <sub>2</sub> = 0.1260                                                                             |
| <b>Final R indexes [all data]</b>                                       | R <sub>1</sub> = 0.0937, wR <sub>2</sub> = 0.1433                                                                             |
| <b>Largest diff. peak/hole / e Å<sup>-3</sup></b>                       | 0.54/-0.44                                                                                                                    |

| <b>Table S21.</b> Fractional Atomic Coordinates (×10 <sup>4</sup> ) and Equivalent Isotropic Displacement Parameters (Å <sup>2</sup> ×10 <sup>3</sup> ) for gellman155. U <sub>eq</sub> is defined as 1/3 of the trace of the orthogonalised U <sub>ij</sub> tensor. |            |            |           |              |
|----------------------------------------------------------------------------------------------------------------------------------------------------------------------------------------------------------------------------------------------------------------------|------------|------------|-----------|--------------|
| <b>Atom</b>                                                                                                                                                                                                                                                          | <b>x</b>   | <b>y</b>   | <b>z</b>  | <b>U(eq)</b> |
| O1                                                                                                                                                                                                                                                                   | 6196.8(11) | 3486.4(9)  | 825.0(7)  | 17.7(2)      |
| O2                                                                                                                                                                                                                                                                   | 5288.7(12) | 3821.7(9)  | 1763.0(7) | 21.0(3)      |
| O3                                                                                                                                                                                                                                                                   | 3369.0(11) | 4769.3(9)  | 384.6(7)  | 20.3(3)      |
| O4                                                                                                                                                                                                                                                                   | 3356.7(11) | 4283.5(10) | 3839.7(7) | 24.5(3)      |
| O5                                                                                                                                                                                                                                                                   | 5532.1(12) | 6488.3(9)  | 3323.2(7) | 22.4(3)      |
| O6                                                                                                                                                                                                                                                                   | 4036.1(13) | 7437.3(10) | 6276.1(8) | 27.6(3)      |
| O7                                                                                                                                                                                                                                                                   | 3573.0(12) | 8669.7(9)  | 5663.8(8) | 23.0(3)      |
| N1                                                                                                                                                                                                                                                                   | 6012.3(13) | 4985.9(10) | 1079.7(8) | 16.2(3)      |
| N2                                                                                                                                                                                                                                                                   | 3475.5(12) | 5406.4(10) | 1665.7(8) | 15.0(3)      |
| N3                                                                                                                                                                                                                                                                   | 4779.8(12) | 4453.4(10) | 3187.1(8) | 15.7(3)      |
| N4                                                                                                                                                                                                                                                                   | 6374.2(13) | 6735.5(10) | 4722.6(8) | 16.6(3)      |
| C1                                                                                                                                                                                                                                                                   | 6617.4(19) | 2086.5(15) | 328.3(12) | 28.1(4)      |
| C2                                                                                                                                                                                                                                                                   | 4671.7(18) | 1845.9(14) | 728.5(12) | 26.9(4)      |

|      |             |             |            |         |
|------|-------------|-------------|------------|---------|
| C3   | 6900.5(18)  | 2484.6(15)  | 1829.7(11) | 25.4(4) |
| C4   | 6077.5(16)  | 2460.4(13)  | 946.3(11)  | 20.0(3) |
| C5   | 5790.1(15)  | 4076.9(12)  | 1262.9(10) | 16.1(3) |
| C6   | 5485.4(14)  | 5671.6(12)  | 1418.7(10) | 14.8(3) |
| C7   | 5891.2(15)  | 6677.9(12)  | 1174.5(10) | 17.8(3) |
| C8   | 7333.3(16)  | 7207.0(14)  | 1533.0(18) | 17.7(4) |
| C9   | 7956.6(19)  | 7575.9(15)  | 2386.0(13) | 23.9(5) |
| C10  | 9290(2)     | 8067.9(16)  | 2727.9(14) | 30.3(5) |
| C11  | 10001.9(19) | 8196.0(16)  | 2216.1(15) | 30.4(5) |
| C12  | 9392.8(19)  | 7843.0(15)  | 1372.9(15) | 29.1(5) |
| C13  | 8062.1(18)  | 7346.1(14)  | 1027.0(13) | 22.6(5) |
| C8A  | 7262(6)     | 7200(14)    | 1764(8)    | 23(9)   |
| C9A  | 7591(10)    | 7712(13)    | 2570(8)    | 22(5)   |
| C10A | 8884(12)    | 8163(13)    | 3074(7)    | 34(6)   |
| C11A | 9847(6)     | 8102(15)    | 2773(10)   | 55(11)  |
| C12A | 9517(9)     | 7590(14)    | 1967(11)   | 31(6)   |
| C13A | 8225(12)    | 7139(13)    | 1463(8)    | 21(5)   |
| C14  | 4002.5(15)  | 5231.3(12)  | 1103(1)    | 14.6(3) |
| C15  | 2079.1(14)  | 5004.1(12)  | 1476.3(10) | 15.5(3) |
| C16  | 1464.6(15)  | 5819.9(13)  | 1326.8(11) | 20.3(3) |
| C17  | 1.5(16)     | 5405.8(15)  | 1107.2(12) | 25.1(4) |
| C18  | -312.1(16)  | 4895.6(15)  | 1771.8(12) | 25.3(4) |
| C19  | 308.3(15)   | 4073.8(14)  | 1904.4(11) | 22.0(4) |
| C20  | 1778.6(14)  | 4493.5(12)  | 2157.8(10) | 16.5(3) |
| C21  | 2496.9(15)  | 3713.6(12)  | 2353.7(10) | 16.7(3) |
| C22  | 1676.0(17)  | 2669.0(13)  | 2360.6(12) | 23.9(4) |
| C23  | 2385.2(19)  | 1919.5(14)  | 2309.1(13) | 30.8(4) |
| C24  | 3580.7(15)  | 4161.0(12)  | 3196.6(10) | 16.7(3) |
| C25  | 5883.6(14)  | 5082.9(12)  | 3899.2(10) | 14.8(3) |
| C26  | 7125.0(15)  | 5013.4(13)  | 3772.6(10) | 17.3(3) |
| C27  | 8338.9(15)  | 5566.8(13)  | 4508.8(10) | 17.6(3) |
| C28  | 8587.4(17)  | 5203.9(15)  | 5233.0(11) | 24.0(4) |
| C29  | 9693.1(18)  | 5693.8(17)  | 5916.0(12) | 30.0(4) |
| C30  | 10561.7(18) | 6568.1(16)  | 5892.3(12) | 30.4(4) |
| C31  | 10334.7(17) | 6937.9(15)  | 5179.7(12) | 27.8(4) |
| C32  | 9227.5(16)  | 6432.8(14)  | 4482.5(11) | 22.6(4) |
| C33  | 5894.4(14)  | 6166.4(12)  | 3959.1(10) | 16.0(3) |
| C34  | 6672.5(15)  | 7818.7(12)  | 4868(1)    | 17.4(3) |
| C35  | 8137.1(16)  | 8336.0(14)  | 5274.6(12) | 24.2(4) |
| C36  | 8489.7(17)  | 9466.1(14)  | 5395.2(13) | 26.9(4) |
| C37  | 7788.2(17)  | 9863.0(14)  | 5889.9(13) | 27.8(4) |
| C38  | 6328.9(17)  | 9333.1(13)  | 5497.2(12) | 23.8(4) |
| C39  | 5981.3(15)  | 8195.7(12)  | 5392.5(10) | 17.8(3) |
| C40  | 4497.6(16)  | 7642.0(13)  | 5039.2(10) | 18.5(3) |
| C41  | 3786.7(16)  | 7837.4(14)  | 4203.1(11) | 22.0(3) |
| C42  | 2395.7(17)  | 7145.1(15)  | 3804.8(12) | 28.4(4) |
| C43  | 3998.5(16)  | 7876.8(13)  | 5718.6(11) | 20.1(3) |
| C44  | 3283.6(18)  | 9047.9(14)  | 6372.7(12) | 26.3(4) |
| C45  | 4445.2(19)  | 9845.9(14)  | 7002.3(12) | 26.0(4) |
| C46  | 4545(2)     | 10846.2(15) | 7056.2(13) | 33.7(5) |
| C47  | 5618(2)     | 11588.6(16) | 7636.8(14) | 39.2(5) |

|     |           |             |            |           |
|-----|-----------|-------------|------------|-----------|
| C48 | 6596(2)   | 11333.5(17) | 8163.6(14) | 40.5(5)   |
| C49 | 6503(2)   | 10342.5(17) | 8122.0(14) | 40.7(5)   |
| C50 | 5432(2)   | 9601.6(15)  | 7543.0(13) | 31.8(4)   |
| C11 | 8802.5(7) | 10311.3(6)  | 883.2(5)   | 42.4(2)   |
| C12 | 6561.0(5) | 9650.4(4)   | 1341.1(4)  | 30.44(16) |
| C13 | 9043.7(6) | 10769.6(5)  | 2600.4(4)  | 35.00(17) |
| C51 | 8242(2)   | 9888(2)     | 1647.3(17) | 26.0(5)   |
| C52 | 8620(20)  | 10399(17)   | 2625(8)    | 80        |
| C53 | 8070(15)  | 9990(20)    | 1687(9)    | 80        |
| C54 | 9058(11)  | 10339(10)   | 1278(8)    | 80        |
| C55 | 8516(14)  | 9988(10)    | 336(7)     | 80        |
| C56 | 8735(11)  | 9028(10)    | 36(8)      | 80        |
| C57 | 10085(11) | 8990(10)    | 495(10)    | 80        |
| C58 | 10289(15) | 8028(11)    | 171(11)    | 80        |

**Table S22.** Anisotropic Displacement Parameters ( $\text{\AA}^2 \times 10^3$ ) for gellman155. The Anisotropic displacement factor exponent takes the form:  $-2\pi^2[h^2a^*U_{11}+2hka^*b^*U_{12}+\dots]$ .

| Atom | U <sub>11</sub> | U <sub>22</sub> | U <sub>33</sub> | U <sub>23</sub> | U <sub>13</sub> | U <sub>12</sub> |
|------|-----------------|-----------------|-----------------|-----------------|-----------------|-----------------|
| O1   | 21.5(6)         | 17.1(6)         | 17.1(6)         | 3.4(5)          | 8.7(5)          | 8.7(5)          |
| O2   | 28.7(6)         | 20.9(6)         | 18.6(6)         | 6.0(5)          | 13.6(5)         | 9.5(5)          |
| O3   | 18.5(5)         | 25.1(6)         | 12.6(6)         | 0.1(5)          | 5.2(4)          | 2.0(5)          |
| O4   | 19.9(6)         | 39.6(8)         | 15.3(6)         | 6.3(5)          | 7.8(5)          | 10.0(5)         |
| O5   | 31.8(7)         | 19.4(6)         | 14.5(6)         | 3.8(5)          | 4.6(5)          | 10.3(5)         |
| O6   | 37.0(7)         | 25.1(7)         | 27.2(7)         | 9.4(6)          | 16.9(6)         | 12.6(6)         |
| O7   | 29.4(6)         | 20.7(6)         | 23.0(6)         | 3.9(5)          | 12.0(5)         | 12.1(5)         |
| N1   | 19.7(6)         | 17.2(7)         | 14.8(7)         | 4.1(5)          | 9.5(5)          | 6.9(5)          |
| N2   | 14.2(6)         | 16.6(7)         | 12.0(6)         | 1.2(5)          | 4.1(5)          | 3.1(5)          |
| N3   | 15.1(6)         | 18.1(7)         | 12.4(6)         | 0.1(5)          | 4.6(5)          | 4.6(5)          |
| N4   | 20.2(6)         | 15.5(7)         | 12.8(6)         | 1.9(5)          | 3.2(5)          | 7.6(5)          |
| C1   | 36.3(10)        | 27.7(10)        | 27.9(10)        | 4.7(8)          | 14.4(8)         | 19.6(8)         |
| C2   | 26.3(9)         | 21.3(9)         | 27.4(10)        | 2.5(7)          | 5.7(7)          | 4.8(7)          |
| C3   | 27.5(9)         | 27(1)           | 23.4(9)         | 8.5(8)          | 7.4(7)          | 12.7(8)         |
| C4   | 24.8(8)         | 18.0(8)         | 19.1(8)         | 3.9(7)          | 7.3(7)          | 10.5(7)         |
| C5   | 16.0(7)         | 18.1(8)         | 13.2(7)         | 2.2(6)          | 4.0(6)          | 6.2(6)          |
| C6   | 16.0(7)         | 15.9(8)         | 12.5(7)         | 2.4(6)          | 5.1(6)          | 5.7(6)          |
| C7   | 15.5(7)         | 16.5(8)         | 18.5(8)         | 4.1(6)          | 3.8(6)          | 3.8(6)          |
| C8   | 16.4(9)         | 10.7(9)         | 21.9(11)        | 2.4(8)          | 3.6(8)          | 2.4(7)          |
| C9   | 23.2(9)         | 18.8(10)        | 22.2(10)        | 3.5(8)          | 3.9(8)          | 0.8(8)          |
| C10  | 26.5(12)        | 22.8(11)        | 26.8(12)        | 2.6(9)          | -1.1(9)         | -0.8(8)         |
| C11  | 17.4(9)         | 19.4(10)        | 45.5(14)        | 3.6(9)          | 3.4(9)          | 2.9(8)          |
| C12  | 23.5(9)         | 22(1)           | 42.5(13)        | 3.0(9)          | 15.9(9)         | 5.2(8)          |
| C13  | 21.2(9)         | 18.2(9)         | 26.6(11)        | 1.5(8)          | 9.5(8)          | 3.9(7)          |
| C14  | 17.0(7)         | 12.8(7)         | 14.5(7)         | 4.3(6)          | 6.4(6)          | 4.4(6)          |
| C15  | 14.3(7)         | 16.9(8)         | 13.7(7)         | 1.3(6)          | 4.4(6)          | 4.0(6)          |
| C16  | 19.1(7)         | 21.6(9)         | 21.2(8)         | 6.7(7)          | 6.4(6)          | 8.4(7)          |
| C17  | 20.3(8)         | 29.4(10)        | 25.3(9)         | 6.8(8)          | 3.7(7)          | 12.5(7)         |
| C18  | 17.3(8)         | 31.7(10)        | 28.9(10)        | 5.9(8)          | 9.1(7)          | 10.5(7)         |
| C19  | 15.6(7)         | 25.4(9)         | 23.7(9)         | 5.5(7)          | 7.5(7)          | 4.0(7)          |

|     |          |          |          |         |          |          |
|-----|----------|----------|----------|---------|----------|----------|
| C20 | 14.3(7)  | 19.4(8)  | 15.7(8)  | 2.3(6)  | 5.8(6)   | 5.6(6)   |
| C21 | 16.2(7)  | 17.3(8)  | 15.7(8)  | 3.8(6)  | 5.3(6)   | 4.5(6)   |
| C22 | 22.2(8)  | 18.2(9)  | 28.0(9)  | 6.0(7)  | 8.0(7)   | 2.5(7)   |
| C23 | 34.2(10) | 20.5(9)  | 35.2(11) | 8.2(8)  | 9.1(8)   | 8.5(8)   |
| C24 | 17.4(7)  | 17.7(8)  | 16.3(8)  | 5.7(6)  | 6.1(6)   | 6.9(6)   |
| C25 | 14.2(7)  | 15.7(8)  | 13.3(7)  | 2.6(6)  | 4.1(6)   | 4.3(6)   |
| C26 | 15.6(7)  | 18.9(8)  | 17.5(8)  | 1.8(6)  | 6.1(6)   | 6.6(6)   |
| C27 | 14.9(7)  | 22.3(8)  | 18.0(8)  | 2.9(7)  | 6.5(6)   | 9.6(6)   |
| C28 | 22.8(8)  | 29.8(10) | 24.4(9)  | 9.1(8)  | 11.2(7)  | 12.0(7)  |
| C29 | 28.4(9)  | 47.2(13) | 20.0(9)  | 9.6(9)  | 8.8(7)   | 19.7(9)  |
| C30 | 20.4(8)  | 40.9(12) | 23.7(9)  | -3.9(8) | 1.3(7)   | 12.4(8)  |
| C31 | 17.0(8)  | 26.6(10) | 35.3(11) | 0.4(8)  | 8.5(7)   | 3.9(7)   |
| C32 | 19.2(8)  | 25.0(9)  | 25.4(9)  | 7.3(7)  | 9.0(7)   | 8.4(7)   |
| C33 | 14.6(7)  | 19.1(8)  | 14.5(7)  | 2.7(6)  | 5.3(6)   | 6.3(6)   |
| C34 | 19.2(7)  | 15.2(8)  | 17.0(8)  | 2.3(6)  | 5.6(6)   | 6.2(6)   |
| C35 | 19.3(8)  | 23.1(9)  | 26.7(9)  | 0.9(7)  | 6.1(7)   | 6.1(7)   |
| C36 | 19.6(8)  | 23.3(9)  | 33.1(10) | 2.9(8)  | 7.8(7)   | 3.1(7)   |
| C37 | 26.0(9)  | 18.2(9)  | 32.4(10) | -0.9(8) | 7.7(8)   | 2.7(7)   |
| C38 | 23.9(8)  | 16.0(8)  | 30.7(10) | 0.1(7)  | 10.7(7)  | 6.0(7)   |
| C39 | 18.6(7)  | 16.2(8)  | 16.5(8)  | 0.5(6)  | 5.3(6)   | 4.8(6)   |
| C40 | 21.0(8)  | 15.7(8)  | 19.3(8)  | 2.1(6)  | 8.2(6)   | 6.3(6)   |
| C41 | 22.2(8)  | 23.5(9)  | 20.4(9)  | 4.7(7)  | 7.9(7)   | 7.4(7)   |
| C42 | 24.2(9)  | 34.1(11) | 21.4(9)  | 2.7(8)  | 4.4(7)   | 6.7(8)   |
| C43 | 19.8(7)  | 17.0(8)  | 21.5(9)  | 1.9(7)  | 6.9(6)   | 4.4(6)   |
| C44 | 32.0(9)  | 26.4(10) | 26.7(10) | 3.5(8)  | 15.5(8)  | 14.2(8)  |
| C45 | 37.6(10) | 22.3(9)  | 24.3(9)  | 4.1(7)  | 19.0(8)  | 10.4(8)  |
| C46 | 55.1(13) | 28.6(11) | 29.0(11) | 10.3(9) | 24.3(10) | 19.2(10) |
| C47 | 68.5(15) | 18.5(10) | 35.9(12) | 4.2(9)  | 31.1(11) | 8.9(10)  |
| C48 | 51.8(13) | 27.7(11) | 33.7(12) | -4.6(9) | 20.2(10) | -1.1(10) |
| C49 | 43.6(12) | 35.8(12) | 33.8(12) | 0.9(10) | 8.3(10)  | 8.6(10)  |
| C50 | 41.2(11) | 20.7(9)  | 31.7(11) | 1.1(8)  | 12.6(9)  | 9.7(8)   |
| Cl1 | 42.8(4)  | 45.0(4)  | 44.2(4)  | 13.1(3) | 26.0(3)  | 8.4(3)   |
| Cl2 | 24.4(3)  | 28.3(3)  | 32.5(3)  | -2.6(2) | 10.4(2)  | 2.7(2)   |
| Cl3 | 28.8(3)  | 31.6(4)  | 33.5(3)  | -0.2(3) | 3.3(2)   | 5.0(2)   |
| C51 | 25.2(11) | 21.6(12) | 30.5(12) | 2.4(9)  | 10.8(9)  | 7.1(9)   |

**Table S23.** Bond Lengths for gellman155.

| Atom | Atom | Length/Å   | Atom | Atom | Length/Å |
|------|------|------------|------|------|----------|
| O1   | C4   | 1.475(2)   | C19  | C20  | 1.532(2) |
| O1   | C5   | 1.3464(19) | C20  | C21  | 1.564(2) |
| O2   | C5   | 1.2235(19) | C21  | C22  | 1.533(2) |
| O3   | C14  | 1.2287(19) | C21  | C24  | 1.523(2) |
| O4   | C24  | 1.231(2)   | C22  | C23  | 1.524(3) |
| O5   | C33  | 1.2377(19) | C25  | C26  | 1.544(2) |
| O6   | C43  | 1.206(2)   | C25  | C33  | 1.532(2) |
| O7   | C43  | 1.351(2)   | C26  | C27  | 1.505(2) |
| O7   | C44  | 1.463(2)   | C27  | C28  | 1.390(2) |
| N1   | C5   | 1.343(2)   | C27  | C32  | 1.387(2) |

|      |      |            |     |     |          |
|------|------|------------|-----|-----|----------|
| N1   | C6   | 1.449(2)   | C28 | C29 | 1.378(3) |
| N2   | C14  | 1.341(2)   | C29 | C30 | 1.383(3) |
| N2   | C15  | 1.4670(19) | C30 | C31 | 1.377(3) |
| N3   | C24  | 1.338(2)   | C31 | C32 | 1.396(3) |
| N3   | C25  | 1.448(2)   | C34 | C35 | 1.533(2) |
| N4   | C33  | 1.335(2)   | C34 | C39 | 1.532(2) |
| N4   | C34  | 1.461(2)   | C35 | C36 | 1.522(3) |
| C1   | C4   | 1.520(2)   | C36 | C37 | 1.518(3) |
| C2   | C4   | 1.518(2)   | C37 | C38 | 1.529(2) |
| C3   | C4   | 1.521(2)   | C38 | C39 | 1.534(2) |
| C6   | C7   | 1.532(2)   | C39 | C40 | 1.556(2) |
| C6   | C14  | 1.539(2)   | C40 | C41 | 1.525(2) |
| C7   | C8   | 1.510(2)   | C40 | C43 | 1.514(2) |
| C7   | C8A  | 1.507(4)   | C41 | C42 | 1.520(2) |
| C8   | C9   | 1.394(3)   | C44 | C45 | 1.502(3) |
| C8   | C13  | 1.392(3)   | C45 | C46 | 1.388(3) |
| C9   | C10  | 1.398(3)   | C45 | C50 | 1.383(3) |
| C10  | C11  | 1.385(3)   | C46 | C47 | 1.390(3) |
| C11  | C12  | 1.376(3)   | C47 | C48 | 1.374(3) |
| C12  | C13  | 1.396(3)   | C48 | C49 | 1.379(3) |
| C8A  | C9A  | 1.3900     | C49 | C50 | 1.387(3) |
| C8A  | C13A | 1.3900     | C11 | C51 | 1.747(3) |
| C9A  | C10A | 1.3900     | C12 | C51 | 1.764(2) |
| C10A | C11A | 1.3900     | C13 | C51 | 1.767(3) |
| C11A | C12A | 1.3900     | C52 | C53 | 1.532(3) |
| C12A | C13A | 1.3900     | C53 | C54 | 1.528(3) |
| C15  | C16  | 1.524(2)   | C54 | C55 | 1.526(3) |
| C15  | C20  | 1.538(2)   | C55 | C56 | 1.526(3) |
| C16  | C17  | 1.531(2)   | C56 | C57 | 1.528(3) |
| C17  | C18  | 1.517(3)   | C57 | C58 | 1.532(3) |
| C18  | C19  | 1.533(2)   |     |     |          |

**Table S24.** Bond Angles for gellman155.

| Atom | Atom | Atom | Angle/°    | Atom | Atom | Atom | Angle/°    |
|------|------|------|------------|------|------|------|------------|
| C5   | O1   | C4   | 120.05(13) | O4   | C24  | N3   | 122.40(15) |
| C43  | O7   | C44  | 116.04(14) | O4   | C24  | C21  | 121.73(14) |
| C5   | N1   | C6   | 117.88(13) | N3   | C24  | C21  | 115.80(14) |
| C14  | N2   | C15  | 121.77(13) | N3   | C25  | C26  | 108.46(13) |
| C24  | N3   | C25  | 122.49(13) | N3   | C25  | C33  | 109.02(12) |
| C33  | N4   | C34  | 122.00(14) | C33  | C25  | C26  | 109.05(13) |
| O1   | C4   | C1   | 101.54(14) | C27  | C26  | C25  | 113.46(13) |
| O1   | C4   | C2   | 110.72(13) | C28  | C27  | C26  | 119.62(16) |
| O1   | C4   | C3   | 110.12(14) | C32  | C27  | C26  | 121.56(15) |
| C1   | C4   | C3   | 111.13(14) | C32  | C27  | C28  | 118.82(16) |
| C2   | C4   | C1   | 111.00(15) | C29  | C28  | C27  | 120.87(18) |
| C2   | C4   | C3   | 111.88(15) | C28  | C29  | C30  | 120.07(18) |
| O2   | C5   | O1   | 124.59(15) | C31  | C30  | C29  | 119.92(18) |
| O2   | C5   | N1   | 124.45(15) | C30  | C31  | C32  | 120.07(18) |

|      |      |      |            |     |     |     |            |
|------|------|------|------------|-----|-----|-----|------------|
| N1   | C5   | O1   | 110.96(14) | C27 | C32 | C31 | 120.23(17) |
| N1   | C6   | C7   | 110.09(13) | O5  | C33 | N4  | 123.20(15) |
| N1   | C6   | C14  | 110.22(13) | O5  | C33 | C25 | 120.45(14) |
| C7   | C6   | C14  | 110.04(12) | N4  | C33 | C25 | 116.25(14) |
| C8   | C7   | C6   | 113.27(14) | N4  | C34 | C35 | 109.93(13) |
| C8A  | C7   | C6   | 104.8(8)   | N4  | C34 | C39 | 112.84(14) |
| C9   | C8   | C7   | 119.9(2)   | C39 | C34 | C35 | 110.41(14) |
| C13  | C8   | C7   | 121.3(2)   | C36 | C35 | C34 | 111.41(14) |
| C13  | C8   | C9   | 118.76(17) | C37 | C36 | C35 | 111.20(16) |
| C8   | C9   | C10  | 120.6(2)   | C36 | C37 | C38 | 111.20(15) |
| C11  | C10  | C9   | 119.9(2)   | C37 | C38 | C39 | 111.87(14) |
| C12  | C11  | C10  | 119.88(19) | C34 | C39 | C38 | 109.15(14) |
| C11  | C12  | C13  | 120.6(2)   | C34 | C39 | C40 | 112.57(13) |
| C8   | C13  | C12  | 120.24(19) | C38 | C39 | C40 | 112.92(13) |
| C9A  | C8A  | C7   | 123.9(10)  | C41 | C40 | C39 | 114.37(14) |
| C9A  | C8A  | C13A | 120.0      | C43 | C40 | C39 | 106.80(13) |
| C13A | C8A  | C7   | 116.1(10)  | C43 | C40 | C41 | 115.00(14) |
| C10A | C9A  | C8A  | 120.0      | C42 | C41 | C40 | 112.79(15) |
| C9A  | C10A | C11A | 120.0      | O6  | C43 | O7  | 123.20(16) |
| C12A | C11A | C10A | 120.0      | O6  | C43 | C40 | 123.77(15) |
| C11A | C12A | C13A | 120.0      | O7  | C43 | C40 | 112.92(14) |
| C12A | C13A | C8A  | 120.0      | O7  | C44 | C45 | 111.31(15) |
| O3   | C14  | N2   | 123.66(14) | C46 | C45 | C44 | 120.47(18) |
| O3   | C14  | C6   | 121.51(14) | C50 | C45 | C44 | 120.88(17) |
| N2   | C14  | C6   | 114.82(13) | C50 | C45 | C46 | 118.65(19) |
| N2   | C15  | C16  | 110.52(13) | C45 | C46 | C47 | 120.8(2)   |
| N2   | C15  | C20  | 111.49(12) | C48 | C47 | C46 | 119.8(2)   |
| C16  | C15  | C20  | 111.81(13) | C47 | C48 | C49 | 120.0(2)   |
| C15  | C16  | C17  | 111.15(14) | C48 | C49 | C50 | 120.2(2)   |
| C18  | C17  | C16  | 110.74(14) | C45 | C50 | C49 | 120.6(2)   |
| C17  | C18  | C19  | 110.50(14) | C11 | C51 | C12 | 110.76(16) |
| C20  | C19  | C18  | 111.53(14) | C11 | C51 | C13 | 110.93(15) |
| C15  | C20  | C21  | 111.46(12) | C12 | C51 | C13 | 109.53(13) |
| C19  | C20  | C15  | 108.23(13) | C54 | C53 | C52 | 112.8(4)   |
| C19  | C20  | C21  | 114.84(14) | C55 | C54 | C53 | 113.9(4)   |
| C22  | C21  | C20  | 116.68(13) | C54 | C55 | C56 | 113.7(4)   |
| C24  | C21  | C20  | 107.03(13) | C55 | C56 | C57 | 114.0(4)   |
| C24  | C21  | C22  | 109.24(14) | C56 | C57 | C58 | 113.0(4)   |
| C23  | C22  | C21  | 110.69(14) |     |     |     |            |

**Table S25.** Hydrogen Bonds for gellman155.

| D  | H  | A               | d(D-H)/Å | d(H-A)/Å  | d(D-A)/Å   | D-H-A/°   |
|----|----|-----------------|----------|-----------|------------|-----------|
| N1 | H1 | O3 <sup>1</sup> | 0.871(9) | 2.018(10) | 2.8868(18) | 175.9(18) |
| N2 | H2 | O5              | 0.870(9) | 2.141(10) | 3.0042(18) | 171.3(18) |
| N3 | H3 | O2              | 0.875(9) | 1.966(10) | 2.8326(18) | 170.5(18) |
| N4 | H4 | O4 <sup>2</sup> | 0.867(9) | 2.144(10) | 3.0010(19) | 169.4(18) |

<sup>1</sup>1-X,1-Y,-Z; <sup>2</sup>1-X,1-Y,1-Z

**Table S26.** Torsion Angles for gellman155.

| <b>A</b> | <b>B</b> | <b>C</b> | <b>D</b> | <b>Angle/°</b> | <b>A</b> | <b>B</b> | <b>C</b> | <b>D</b> | <b>Angle/°</b> |
|----------|----------|----------|----------|----------------|----------|----------|----------|----------|----------------|
| O7       | C44      | C45      | C46      | 102.51(19)     | C18      | C19      | C20      | C21      | 176.77(14)     |
| O7       | C44      | C45      | C50      | -77.9(2)       | C19      | C20      | C21      | C22      | -6.4(2)        |
| N1       | C6       | C7       | C8       | -63.9(2)       | C19      | C20      | C21      | C24      | -129.01(15)    |
| N1       | C6       | C7       | C8A      | -79.1(6)       | C20      | C15      | C16      | C17      | -56.57(18)     |
| N1       | C6       | C14      | O3       | -39.4(2)       | C20      | C21      | C22      | C23      | 163.66(15)     |
| N1       | C6       | C14      | N2       | 141.55(14)     | C20      | C21      | C24      | O4       | 68.28(19)      |
| N2       | C15      | C16      | C17      | 178.60(14)     | C20      | C21      | C24      | N3       | -108.69(15)    |
| N2       | C15      | C20      | C19      | -178.66(13)    | C22      | C21      | C24      | O4       | -58.9(2)       |
| N2       | C15      | C20      | C21      | -51.45(17)     | C22      | C21      | C24      | N3       | 124.13(15)     |
| N3       | C25      | C26      | C27      | -174.90(13)    | C24      | N3       | C25      | C26      | 163.20(15)     |
| N3       | C25      | C33      | O5       | -35.47(19)     | C24      | N3       | C25      | C33      | -78.17(18)     |
| N3       | C25      | C33      | N4       | 147.96(14)     | C24      | C21      | C22      | C23      | -74.83(18)     |
| N4       | C34      | C35      | C36      | 177.07(14)     | C25      | N3       | C24      | O4       | -10.7(2)       |
| N4       | C34      | C39      | C38      | -178.84(13)    | C25      | N3       | C24      | C21      | 166.20(14)     |
| N4       | C34      | C39      | C40      | -52.63(18)     | C25      | C26      | C27      | C28      | 70.3(2)        |
| C4       | O1       | C5       | O2       | -1.4(2)        | C25      | C26      | C27      | C32      | -110.12(17)    |
| C4       | O1       | C5       | N1       | 178.39(13)     | C26      | C25      | C33      | O5       | 82.79(18)      |
| C5       | O1       | C4       | C1       | 178.91(13)     | C26      | C25      | C33      | N4       | -93.79(16)     |
| C5       | O1       | C4       | C2       | 60.99(19)      | C26      | C27      | C28      | C29      | 179.82(16)     |
| C5       | O1       | C4       | C3       | -63.26(18)     | C26      | C27      | C32      | C31      | 179.01(15)     |
| C5       | N1       | C6       | C7       | 177.45(13)     | C27      | C28      | C29      | C30      | 1.2(3)         |
| C5       | N1       | C6       | C14      | -60.98(18)     | C28      | C27      | C32      | C31      | -1.4(2)        |
| C6       | N1       | C5       | O1       | 172.37(12)     | C28      | C29      | C30      | C31      | -1.4(3)        |
| C6       | N1       | C5       | O2       | -7.8(2)        | C29      | C30      | C31      | C32      | 0.2(3)         |
| C6       | C7       | C8       | C9       | -67.9(2)       | C30      | C31      | C32      | C27      | 1.2(3)         |
| C6       | C7       | C8       | C13      | 112.8(2)       | C32      | C27      | C28      | C29      | 0.2(2)         |
| C6       | C7       | C8A      | C9A      | -81.3(12)      | C33      | N4       | C34      | C35      | -112.07(17)    |
| C6       | C7       | C8A      | C13A     | 98.1(10)       | C33      | N4       | C34      | C39      | 124.20(16)     |
| C7       | C6       | C14      | O3       | 82.19(18)      | C33      | C25      | C26      | C27      | 66.49(17)      |
| C7       | C6       | C14      | N2       | -96.84(16)     | C34      | N4       | C33      | O5       | -8.4(2)        |
| C7       | C8       | C9       | C10      | -179.95(18)    | C34      | N4       | C33      | C25      | 168.07(13)     |
| C7       | C8       | C13      | C12      | 179.61(17)     | C34      | C35      | C36      | C37      | 55.6(2)        |
| C7       | C8A      | C9A      | C10A     | 179.3(18)      | C34      | C39      | C40      | C41      | -66.47(18)     |
| C7       | C8A      | C13A     | C12A     | -179.4(17)     | C34      | C39      | C40      | C43      | 165.11(14)     |
| C8       | C7       | C8A      | C9A      | 156(4)         | C35      | C34      | C39      | C38      | 57.69(18)      |
| C8       | C7       | C8A      | C13A     | -25(2)         | C35      | C34      | C39      | C40      | -176.09(14)    |
| C8       | C9       | C10      | C11      | 0.3(3)         | C35      | C36      | C37      | C38      | -54.1(2)       |
| C9       | C8       | C13      | C12      | 0.3(3)         | C36      | C37      | C38      | C39      | 55.7(2)        |
| C9       | C10      | C11      | C12      | 0.3(3)         | C37      | C38      | C39      | C34      | -57.18(19)     |
| C10      | C11      | C12      | C13      | -0.7(3)        | C37      | C38      | C39      | C40      | 176.81(15)     |
| C11      | C12      | C13      | C8       | 0.4(3)         | C38      | C39      | C40      | C41      | 57.69(19)      |
| C13      | C8       | C9       | C10      | -0.6(3)        | C38      | C39      | C40      | C43      | -70.73(18)     |
| C8A      | C7       | C8       | C9       | -6(3)          | C39      | C34      | C35      | C36      | -57.79(19)     |
| C8A      | C7       | C8       | C13      | 175(3)         | C39      | C40      | C41      | C42      | 169.46(14)     |
| C8A      | C9A      | C10A     | C11A     | 0.0            | C39      | C40      | C43      | O6       | -82.8(2)       |
| C9A      | C8A      | C13A     | C12A     | 0.0            | C39      | C40      | C43      | O7       | 93.59(16)      |
| C9A      | C10A     | C11A     | C12A     | 0.0            | C41      | C40      | C43      | O6       | 149.14(17)     |

|      |      |      |      |             |     |     |     |     |             |
|------|------|------|------|-------------|-----|-----|-----|-----|-------------|
| C10A | C11A | C12A | C13A | 0.0         | C41 | C40 | C43 | O7  | -34.5(2)    |
| C11A | C12A | C13A | C8A  | 0.0         | C43 | O7  | C44 | C45 | 90.81(18)   |
| C13A | C8A  | C9A  | C10A | 0.0         | C43 | C40 | C41 | C42 | -66.4(2)    |
| C14  | N2   | C15  | C16  | -103.71(17) | C44 | O7  | C43 | O6  | 6.5(2)      |
| C14  | N2   | C15  | C20  | 131.28(15)  | C44 | O7  | C43 | C40 | -169.93(14) |
| C14  | C6   | C7   | C8   | 174.41(17)  | C44 | C45 | C46 | C47 | -179.93(18) |
| C14  | C6   | C7   | C8A  | 159.2(6)    | C44 | C45 | C50 | C49 | 179.86(19)  |
| C15  | N2   | C14  | O3   | 3.5(2)      | C45 | C46 | C47 | C48 | 0.2(3)      |
| C15  | N2   | C14  | C6   | -177.45(13) | C46 | C45 | C50 | C49 | -0.6(3)     |
| C15  | C16  | C17  | C18  | 55.3(2)     | C46 | C47 | C48 | C49 | -0.8(3)     |
| C15  | C20  | C21  | C22  | -129.89(15) | C47 | C48 | C49 | C50 | 0.7(3)      |
| C15  | C20  | C21  | C24  | 107.46(15)  | C48 | C49 | C50 | C45 | 0.0(3)      |
| C16  | C15  | C20  | C19  | 57.05(17)   | C50 | C45 | C46 | C47 | 0.5(3)      |
| C16  | C15  | C20  | C21  | -175.74(13) | C52 | C53 | C54 | C55 | -176.9(17)  |
| C16  | C17  | C18  | C19  | -56.1(2)    | C53 | C54 | C55 | C56 | -94.7(19)   |
| C17  | C18  | C19  | C20  | 58.7(2)     | C54 | C55 | C56 | C57 | -42.6(17)   |
| C18  | C19  | C20  | C15  | -58.00(18)  | C55 | C56 | C57 | C58 | -178.9(14)  |

**Table S27.** Hydrogen Atom Coordinates ( $\text{\AA}\times 10^4$ ) and Isotropic Displacement Parameters ( $\text{\AA}^2\times 10^3$ ) for gellman155.

| Atom | <i>x</i> | <i>y</i> | <i>z</i> | U(eq) |
|------|----------|----------|----------|-------|
| H1   | 6239(18) | 5075(14) | 654(9)   | 19    |
| H2   | 4007(15) | 5701(13) | 2169(7)  | 18    |
| H3   | 4906(18) | 4313(14) | 2724(8)  | 19    |
| H4   | 6559(18) | 6463(14) | 5148(9)  | 20    |
| H1A  | 6105     | 2121     | -231     | 42    |
| H1B  | 6577     | 1393     | 343      | 42    |
| H1C  | 7518     | 2504     | 474      | 42    |
| H2A  | 4356     | 2083     | 1147     | 40    |
| H2B  | 4596     | 1142     | 714      | 40    |
| H2C  | 4155     | 1916     | 183      | 40    |
| H3A  | 7789     | 2916     | 1957     | 38    |
| H3B  | 6895     | 1807     | 1886     | 38    |
| H3C  | 6548     | 2747     | 2216     | 38    |
| H6   | 5832     | 5779     | 2037     | 18    |
| H7AA | 5594     | 6568     | 562      | 21    |
| H7AB | 5457     | 7114     | 1366     | 21    |
| H7BC | 5849     | 6580     | 593      | 21    |
| H7BD | 5325     | 7069     | 1236     | 21    |
| H9   | 7470     | 7492     | 2738     | 29    |
| H10  | 9707     | 8314     | 3310     | 36    |
| H11  | 10909    | 8527     | 2447     | 36    |
| H12  | 9882     | 7938     | 1023     | 35    |
| H13  | 7652     | 7102     | 444      | 27    |
| H9A  | 6933     | 7754     | 2777     | 27    |
| H10A | 9109     | 8514     | 3625     | 41    |
| H11A | 10730    | 8411     | 3117     | 66    |
| H12A | 10175    | 7548     | 1760     | 38    |



|      |       |       |      |     |
|------|-------|-------|------|-----|
| H13A | 7999  | 6788  | 912  | 25  |
| H15  | 1697  | 4484  | 950  | 19  |
| H16A | 1646  | 6109  | 868  | 24  |
| H16B | 1851  | 6360  | 1832 | 24  |
| H17A | -365  | 5958  | 1051 | 30  |
| H17B | -399  | 4921  | 568  | 30  |
| H18A | -1261 | 4600  | 1604 | 30  |
| H18B | 13    | 5395  | 2298 | 30  |
| H19A | 97    | 3752  | 2342 | 26  |
| H19B | -55   | 3557  | 1385 | 26  |
| H20  | 2112  | 5024  | 2674 | 20  |
| H21  | 2901  | 3638  | 1930 | 20  |
| H22A | 1483  | 2691  | 2876 | 29  |
| H22B | 846   | 2453  | 1884 | 29  |
| H23A | 2480  | 1835  | 1768 | 46  |
| H23B | 1890  | 1276  | 2376 | 46  |
| H23C | 3242  | 2166  | 2750 | 46  |
| H25  | 5836  | 4858  | 4416 | 18  |
| H26A | 7060  | 4301  | 3655 | 21  |
| H26B | 7188  | 5286  | 3282 | 21  |
| H28  | 7987  | 4610  | 5258 | 29  |
| H29  | 9858  | 5431  | 6404 | 36  |
| H30  | 11314 | 6913  | 6367 | 36  |
| H31  | 10932 | 7537  | 5162 | 33  |
| H32  | 9082  | 6683  | 3988 | 27  |
| H34  | 6377  | 8002  | 4317 | 21  |
| H35A | 8455  | 8158  | 5819 | 29  |
| H35B | 8566  | 8095  | 4922 | 29  |
| H36A | 9434  | 9779  | 5689 | 32  |
| H36B | 8260  | 9649  | 4847 | 32  |
| H37A | 7975  | 10589 | 5916 | 33  |
| H37B | 8108  | 9763  | 6464 | 33  |
| H38A | 5996  | 9496  | 4948 | 29  |
| H38B | 5905  | 9580  | 5851 | 29  |
| H39  | 6331  | 8056  | 5956 | 21  |
| H40  | 4374  | 6910  | 4951 | 22  |
| H41A | 3794  | 8538  | 4280 | 26  |
| H41B | 4252  | 7752  | 3824 | 26  |
| H42A | 1989  | 7294  | 3267 | 43  |
| H42B | 1920  | 7245  | 4167 | 43  |
| H42C | 2381  | 6450  | 3724 | 43  |
| H44A | 2996  | 8490  | 6635 | 32  |
| H44B | 2569  | 9324  | 6178 | 32  |
| H46  | 3872  | 11025 | 6692 | 40  |
| H47  | 5675  | 12271 | 7669 | 47  |
| H48  | 7335  | 11840 | 8556 | 49  |
| H49  | 7175  | 10167 | 8491 | 49  |
| H50  | 5375  | 8920  | 7518 | 38  |
| H51  | 8423  | 9251  | 1728 | 31  |
| H52A | 8521  | 11055 | 2742 | 120 |
| H52B | 9538  | 10464 | 2845 | 120 |

|      |       |       |      |     |
|------|-------|-------|------|-----|
| H52C | 8152  | 9940  | 2890 | 120 |
| H53A | 7764  | 9250  | 1576 | 96  |
| H53B | 7316  | 10206 | 1433 | 96  |
| H54A | 9401  | 11078 | 1418 | 96  |
| H54B | 9790  | 10092 | 1512 | 96  |
| H55A | 8922  | 10523 | 92   | 96  |
| H55B | 7576  | 9880  | 131  | 96  |
| H56A | 8589  | 8953  | -563 | 96  |
| H56B | 8088  | 8453  | 102  | 96  |
| H57A | 10227 | 9048  | 1092 | 96  |
| H57B | 10735 | 9570  | 438  | 96  |
| H58A | 10807 | 8166  | -179 | 120 |
| H58B | 9449  | 7523  | -156 | 120 |
| H58C | 10741 | 7778  | 640  | 120 |

**Table S28** Atomic Occupancy for gellman155.

| <b>Atom</b> | <b>Occupancy</b> | <b>Atom</b> | <b>Occupancy</b> | <b>Atom</b> | <b>Occupancy</b> |
|-------------|------------------|-------------|------------------|-------------|------------------|
| H7AA        | 0.919(4)         | H7AB        | 0.919(4)         | H7BC        | 0.081(4)         |
| H7BD        | 0.081(4)         | C8          | 0.919(4)         | C9          | 0.919(4)         |
| H9          | 0.919(4)         | C10         | 0.919(4)         | H10         | 0.919(4)         |
| C11         | 0.919(4)         | H11         | 0.919(4)         | C12         | 0.919(4)         |
| H12         | 0.919(4)         | C13         | 0.919(4)         | H13         | 0.919(4)         |
| C8A         | 0.081(4)         | C9A         | 0.081(4)         | H9A         | 0.081(4)         |
| C10A        | 0.081(4)         | H10A        | 0.081(4)         | C11A        | 0.081(4)         |
| H11A        | 0.081(4)         | C12A        | 0.081(4)         | H12A        | 0.081(4)         |
| C13A        | 0.081(4)         | H13A        | 0.081(4)         | Cl1         | 0.8161(15)       |
| Cl2         | 0.8161(15)       | Cl3         | 0.8161(15)       | C51         | 0.8161(15)       |
| H51         | 0.8161(15)       | C52         | 0.1839(15)       | H52A        | 0.1839(15)       |
| H52B        | 0.1839(15)       | H52C        | 0.1839(15)       | C53         | 0.1839(15)       |
| H53A        | 0.1839(15)       | H53B        | 0.1839(15)       | C54         | 0.1839(15)       |
| H54A        | 0.1839(15)       | H54B        | 0.1839(15)       | C55         | 0.1839(15)       |
| H55A        | 0.1839(15)       | H55B        | 0.1839(15)       | C56         | 0.1839(15)       |
| H56A        | 0.1839(15)       | H56B        | 0.1839(15)       | C57         | 0.1839(15)       |
| H57A        | 0.1839(15)       | H57B        | 0.1839(15)       | C58         | 0.1839(15)       |
| H58A        | 0.1839(15)       | H58B        | 0.1839(15)       | H58C        | 0.1839(15)       |

## Crystallographic Experimental Section for Compound 1b

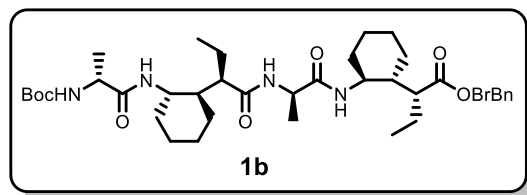

### Data Collection

A colorless crystal with approximate dimensions 0.50 x 0.12 x 0.11 mm<sup>3</sup> was selected under oil under ambient conditions and attached to the tip of a MiTeGen MicroMount©. The crystal was mounted in a stream of cold nitrogen at 100(1) K and centered in the X-ray beam by using a video camera.

The crystal evaluation and data collection were performed on a Bruker SMART APEXII diffractometer with Cu K $\alpha$  ( $\lambda = 1.54178 \text{ \AA}$ ) radiation and the diffractometer to crystal distance of 4.03 cm.

The initial cell constants were obtained from three series of  $\omega$  scans at different starting angles. Each series consisted of 41 frames collected at intervals of 0.6° in a 25° range about  $\omega$  with the exposure time of 5 seconds per frame. The reflections were successfully indexed by an automated indexing routine built in the APEXII program. The final cell constants were calculated from a set of 9956 strong reflections from the actual data collection.

The data were collected by using the full sphere data collection routine to survey the reciprocal space to the extent of a full sphere to a resolution of 0.82 Å. A total of 98960 data were harvested by collecting 19 sets of frames with 0.7° scans in  $\omega$  with an exposure time 20-60 sec per frame. These highly redundant datasets were corrected for Lorentz and polarization effects. The absorption correction was based on fitting a function to the empirical transmission surface as sampled by multiple equivalent measurements. [1]

### Structure Solution and Refinement

The systematic absences in the diffraction data were consistent for the space group  $P6_1$  that yielded chemically reasonable and computationally stable results of refinement [2-4].

A successful solution by the direct methods provided most non-hydrogen atoms from the  $E$ -map. The remaining non-hydrogen atoms were located in an alternating series of least-squares cycles and difference Fourier maps. All non-hydrogen atoms were refined with anisotropic displacement coefficients. All hydrogen atoms (except amido H atoms) were included in the structure factor calculation at idealized positions and were allowed to ride on the neighboring atoms with relative isotropic displacement coefficients.

There was one partially occupied diatomic solvate molecule of methanol (or two water molecules) present in the asymmetric unit. A significant amount of time was invested in identifying and refining the disordered molecules. Bond length restraints were applied to model the molecules but the resulting isotropic displacement coefficients suggested the molecules were mobile. In addition, the refinement was computationally unstable. Option SQUEEZE of program PLATON [5] was used to correct the diffraction data for diffuse scattering effects and to identify

the solvate molecule. PLATON calculated the upper limit of volume that can be occupied by the solvent to be 202 Å<sup>3</sup>, or 3% of the unit cell volume. The program calculated 54 electrons in the unit cell for the diffuse species. This approximately corresponds to one half of methanol molecule per foldamer in the asymmetric unit (54 electrons). Please note that all derived results in the following tables are based on the known contents. No data are given for the diffusely scattering species.

The final least-squares refinement of 459 parameters against 7816 data resulted in residuals  $R$  (based on  $F^2$  for  $I \geq 2\sigma$ ) and  $wR$  (based on  $F^2$  for all data) of 0.0410 and 0.1083, respectively. The final difference Fourier map was featureless.

The molecular diagram is drawn with 40% probability ellipsoids.

## References

- [1] Bruker-AXS. (2007) APEX2, SADABS, and SAINT Software Reference Manuals. Bruker-AXS, Madison, Wisconsin, USA.
- [2] Sheldrick, G. M. (2008) SHELXL. *Acta Cryst.* **A64**, 112-122.
- [3] Dolomanov, O.V.; Bourhis, L.J.; Gildea, R.J.; Howard, J.A.K.; Puschmann, H. "OLEX2: a complete structure solution, refinement and analysis program". *J. Appl. Cryst.* (2009) **42**, 339-341.
- [4] Guzei, I.A. (2006-2008). Internal laboratory computer programs "Inserter", "FCF\_filter", "Modicifer".
- [5] A.L. Spek (1990) *Acta Cryst.* **A46**, C34.

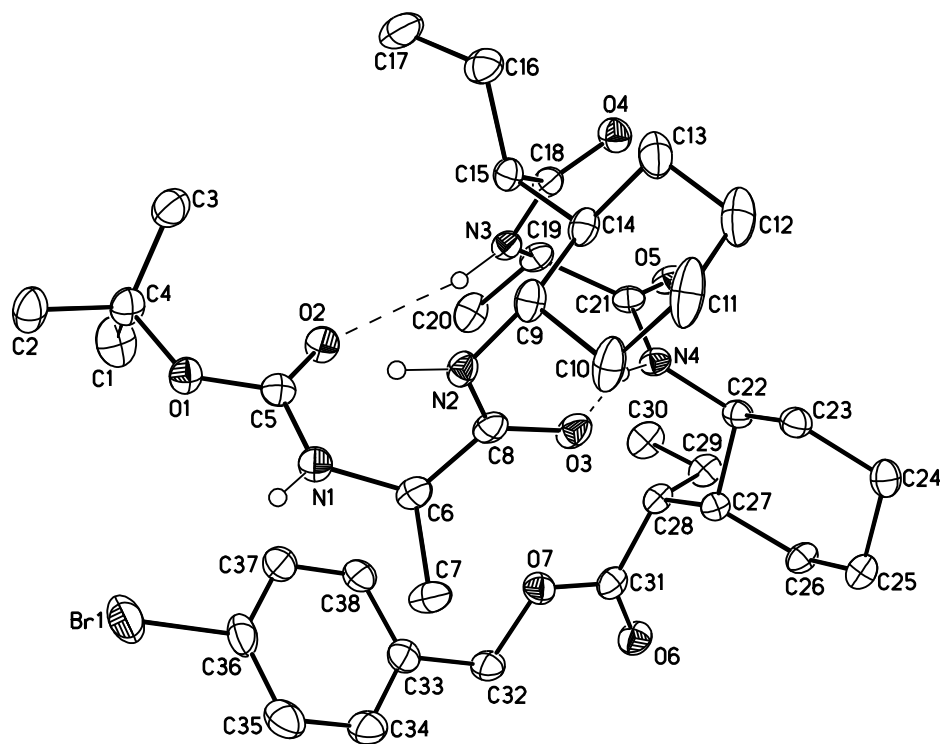

**Figure S21.** A molecular drawing of Gellman126. All non-amido H atoms are omitted. Two hydrogen bonds are shown with dashed lines.

**Table S29.** Crystal data and structure refinement for gellman126.

| Identification code                    | gellman126                                                                 |           |
|----------------------------------------|----------------------------------------------------------------------------|-----------|
| Empirical formula                      | C <sub>38</sub> H <sub>59</sub> Br N <sub>4</sub> O <sub>7</sub> .1/2 MeOH |           |
| Formula weight                         | 763.80                                                                     |           |
| Temperature                            | 100(2) K                                                                   |           |
| Wavelength                             | 1.54178 Å                                                                  |           |
| Crystal system                         | Hexagonal                                                                  |           |
| Space group                            | P6 <sub>1</sub>                                                            |           |
| Unit cell dimensions                   | a = 25.5011(4) Å                                                           | α = 90°.  |
|                                        | b = 25.5011(4) Å                                                           | β = 90°.  |
|                                        | c = 11.0911(2) Å                                                           | γ = 120°. |
| Volume                                 | 6246.30(18) Å <sup>3</sup>                                                 |           |
| Z                                      | 6                                                                          |           |
| Density (calculated)                   | 1.218 Mg/m <sup>3</sup>                                                    |           |
| Absorption coefficient                 | 1.736 mm <sup>-1</sup>                                                     |           |
| F(000)                                 | 2436                                                                       |           |
| Crystal size                           | 0.50 x 0.12 x 0.11 mm <sup>3</sup>                                         |           |
| Theta range for data collection        | 2.00 to 71.66°.                                                            |           |
| Index ranges                           | -30<=h<=30, -31<=k<=30, -12<=l<=13                                         |           |
| Reflections collected                  | 98960                                                                      |           |
| Independent reflections                | 7816 [R(int) = 0.0658]                                                     |           |
| Completeness to theta = 67.00°         | 99.8 %                                                                     |           |
| Absorption correction                  | Empirical with SADABS                                                      |           |
| Max. and min. transmission             | 0.8374 and 0.4797                                                          |           |
| Refinement method                      | Full-matrix least-squares on F <sup>2</sup>                                |           |
| Data / restraints / parameters         | 7816 / 1 / 459                                                             |           |
| Goodness-of-fit on F <sup>2</sup>      | 1.046                                                                      |           |
| Final R indices [I>2sigma(I)]          | R1 = 0.0410, wR2 = 0.1074                                                  |           |
| R indices (all data)                   | R1 = 0.0425, wR2 = 0.1083                                                  |           |
| Absolute structure parameter (Flack x) | -0.008(12)                                                                 |           |
| Absolute structure parameter (Hooft y) | -0.012(3)                                                                  |           |
| Largest diff. peak and hole            | 0.678 and -0.379 e.Å <sup>-3</sup>                                         |           |

**Table S30.** Atomic coordinates ( x 10<sup>4</sup>) and equivalent isotropic displacement parameters (Å<sup>2</sup>x 10<sup>3</sup>) for gellman126. U(eq) is defined as one third of the trace of the orthogonalized U<sup>ij</sup> tensor.

|       | x       | y       | z       | U(eq) |
|-------|---------|---------|---------|-------|
| Br(1) | 5112(1) | 5276(1) | 7996(1) | 65(1) |
| O(1)  | 6534(1) | 6760(1) | 8051(2) | 28(1) |
| O(2)  | 6280(1) | 7410(1) | 7146(2) | 31(1) |
| O(3)  | 6362(1) | 7484(1) | 3522(2) | 32(1) |
| O(4)  | 7314(1) | 9411(1) | 4738(2) | 30(1) |
| O(5)  | 5732(1) | 9098(1) | 4231(2) | 30(1) |
| O(6)  | 3548(1) | 6853(1) | 3166(2) | 37(1) |
| O(7)  | 4249(1) | 6788(1) | 4274(2) | 33(1) |
| N(1)  | 6226(1) | 6600(1) | 6166(2) | 29(1) |
| N(2)  | 7081(1) | 7395(1) | 4574(2) | 26(1) |
| N(3)  | 6625(1) | 8543(1) | 5636(2) | 24(1) |
| N(4)  | 5894(1) | 8352(1) | 3558(2) | 24(1) |
| C(1)  | 6046(2) | 6908(2) | 9793(3) | 50(1) |
| C(2)  | 6902(2) | 6688(1) | 9918(3) | 43(1) |

|       |         |         |         |       |
|-------|---------|---------|---------|-------|
| C(3)  | 7111(1) | 7706(1) | 9184(3) | 45(1) |
| C(4)  | 6648(1) | 7035(1) | 9243(2) | 32(1) |
| C(5)  | 6341(1) | 6962(1) | 7128(2) | 27(1) |
| C(6)  | 6013(1) | 6725(1) | 5050(2) | 30(1) |
| C(7)  | 5731(1) | 6158(1) | 4263(3) | 43(1) |
| C(8)  | 6505(1) | 7243(1) | 4327(2) | 27(1) |
| C(9)  | 7611(1) | 7853(1) | 3928(2) | 29(1) |
| C(10) | 7612(1) | 7635(1) | 2638(2) | 40(1) |
| C(11) | 8168(2) | 8092(2) | 1929(3) | 52(1) |
| C(12) | 8215(1) | 8708(2) | 1939(3) | 48(1) |
| C(13) | 8239(1) | 8925(1) | 3230(2) | 39(1) |
| C(14) | 7663(1) | 8479(1) | 3929(2) | 28(1) |
| C(15) | 7618(1) | 8678(1) | 5231(2) | 25(1) |
| C(16) | 8214(1) | 9148(1) | 5819(2) | 34(1) |
| C(17) | 8135(1) | 9236(1) | 7149(3) | 45(1) |
| C(18) | 7178(1) | 8920(1) | 5193(2) | 25(1) |
| C(19) | 6157(1) | 8717(1) | 5646(2) | 27(1) |
| C(20) | 5631(1) | 8274(1) | 6416(2) | 37(1) |
| C(21) | 5922(1) | 8747(1) | 4388(2) | 24(1) |
| C(22) | 5610(1) | 8294(1) | 2381(2) | 24(1) |
| C(23) | 6008(1) | 8264(1) | 1392(2) | 28(1) |
| C(24) | 5727(1) | 8204(1) | 139(2)  | 31(1) |
| C(25) | 5088(1) | 7654(1) | 91(2)   | 30(1) |
| C(26) | 4693(1) | 7687(1) | 1086(2) | 28(1) |
| C(27) | 4970(1) | 7734(1) | 2339(2) | 24(1) |
| C(28) | 4558(1) | 7733(1) | 3371(2) | 26(1) |
| C(29) | 4308(1) | 8164(1) | 3199(2) | 32(1) |
| C(30) | 4082(1) | 8285(1) | 4381(3) | 41(1) |
| C(31) | 4053(1) | 7086(1) | 3575(2) | 30(1) |
| C(32) | 3811(1) | 6168(1) | 4558(2) | 34(1) |
| C(33) | 4123(1) | 5941(1) | 5405(2) | 34(1) |
| C(34) | 4063(1) | 5376(1) | 5261(3) | 41(1) |
| C(35) | 4344(1) | 5170(1) | 6049(3) | 46(1) |
| C(36) | 4697(1) | 5543(1) | 6956(3) | 44(1) |
| C(37) | 4764(1) | 6105(1) | 7124(3) | 40(1) |
| C(38) | 4470(1) | 6304(1) | 6353(3) | 36(1) |

---

**Table S31.** Bond lengths [Å] and angles [°] for gellman126.

|              |          |              |          |
|--------------|----------|--------------|----------|
| Br(1)-C(36)  | 1.904(3) | C(10)-H(10A) | 0.9900   |
| O(1)-C(5)    | 1.345(3) | C(11)-C(12)  | 1.514(5) |
| O(1)-C(4)    | 1.458(3) | C(11)-H(11B) | 0.9900   |
| O(2)-C(5)    | 1.228(3) | C(11)-H(11A) | 0.9900   |
| O(3)-C(8)    | 1.239(3) | C(12)-C(13)  | 1.526(4) |
| O(4)-C(18)   | 1.229(3) | C(12)-H(12A) | 0.9900   |
| O(5)-C(21)   | 1.225(3) | C(12)-H(12B) | 0.9900   |
| O(6)-C(31)   | 1.205(3) | C(13)-C(14)  | 1.543(3) |
| O(7)-C(31)   | 1.345(3) | C(13)-H(13B) | 0.9900   |
| O(7)-C(32)   | 1.444(3) | C(13)-H(13A) | 0.9900   |
| N(1)-C(5)    | 1.343(3) | C(14)-C(15)  | 1.554(3) |
| N(1)-C(6)    | 1.449(3) | C(14)-H(14)  | 1.0000   |
| N(1)-H(1)    | 0.8800   | C(15)-C(18)  | 1.526(3) |
| N(2)-C(8)    | 1.344(3) | C(15)-C(16)  | 1.533(3) |
| N(2)-C(9)    | 1.458(3) | C(15)-H(15)  | 1.0000   |
| N(2)-H(2)    | 0.8800   | C(16)-C(17)  | 1.521(4) |
| N(3)-C(18)   | 1.342(3) | C(16)-H(16A) | 0.9900   |
| N(3)-C(19)   | 1.466(3) | C(16)-H(16B) | 0.9900   |
| N(3)-H(3)    | 0.8800   | C(17)-H(17B) | 0.9800   |
| N(4)-C(21)   | 1.338(3) | C(17)-H(17C) | 0.9800   |
| N(4)-C(22)   | 1.464(3) | C(17)-H(17A) | 0.9800   |
| N(4)-H(4)    | 0.8800   | C(19)-C(20)  | 1.514(3) |
| C(1)-C(4)    | 1.527(4) | C(19)-C(21)  | 1.535(3) |
| C(1)-H(1C)   | 0.9800   | C(19)-H(19)  | 1.0000   |
| C(1)-H(1A)   | 0.9800   | C(20)-H(20B) | 0.9800   |
| C(1)-H(1B)   | 0.9800   | C(20)-H(20C) | 0.9800   |
| C(2)-C(4)    | 1.528(4) | C(20)-H(20A) | 0.9800   |
| C(2)-H(2C)   | 0.9800   | C(22)-C(23)  | 1.522(3) |
| C(2)-H(2B)   | 0.9800   | C(22)-C(27)  | 1.541(3) |
| C(2)-H(2A)   | 0.9800   | C(22)-H(22)  | 1.0000   |
| C(3)-C(4)    | 1.518(4) | C(23)-C(24)  | 1.535(3) |
| C(3)-H(3A)   | 0.9800   | C(23)-H(23A) | 0.9900   |
| C(3)-H(3B)   | 0.9800   | C(23)-H(23B) | 0.9900   |
| C(3)-H(3C)   | 0.9800   | C(24)-C(25)  | 1.529(3) |
| C(6)-C(8)    | 1.518(3) | C(24)-H(24B) | 0.9900   |
| C(6)-C(7)    | 1.525(3) | C(24)-H(24A) | 0.9900   |
| C(6)-H(6)    | 1.0000   | C(25)-C(26)  | 1.525(3) |
| C(7)-H(7B)   | 0.9800   | C(25)-H(25B) | 0.9900   |
| C(7)-H(7A)   | 0.9800   | C(25)-H(25A) | 0.9900   |
| C(7)-H(7C)   | 0.9800   | C(26)-C(27)  | 1.535(3) |
| C(9)-C(14)   | 1.535(3) | C(26)-H(26A) | 0.9900   |
| C(9)-C(10)   | 1.536(3) | C(26)-H(26B) | 0.9900   |
| C(9)-H(9)    | 1.0000   | C(27)-C(28)  | 1.552(3) |
| C(10)-C(11)  | 1.527(4) | C(27)-H(27)  | 1.0000   |
| C(10)-H(10B) | 0.9900   | C(28)-C(31)  | 1.518(3) |



C(28)-C(29) 1.531(3)  
 C(28)-H(28) 1.0000  
 C(29)-C(30) 1.526(4)  
 C(29)-H(29B) 0.9900  
 C(29)-H(29A) 0.9900  
 C(30)-H(30B) 0.9800  
 C(30)-H(30C) 0.9800  
 C(30)-H(30A) 0.9800  
 C(32)-C(33) 1.519(4)  
 C(32)-H(32A) 0.9900  
 C(32)-H(32B) 0.9900

C(33)-C(34) 1.379(4)  
 C(33)-C(38) 1.389(4)  
 C(34)-C(35) 1.389(4)  
 C(34)-H(34) 0.9500  
 C(35)-C(36) 1.368(5)  
 C(35)-H(35) 0.9500  
 C(36)-C(37) 1.370(4)  
 C(37)-C(38) 1.390(4)  
 C(37)-H(37) 0.9500  
 C(38)-H(38) 0.9500

*C(5)-O(1)-C(4)* 121.91(17)  
*C(31)-O(7)-C(32)* 116.27(18)  
*C(5)-N(1)-C(6)* 120.37(19)  
*C(5)-N(1)-H(1)* 119.8  
*C(6)-N(1)-H(1)* 119.8  
*C(8)-N(2)-C(9)* 124.96(19)  
*C(8)-N(2)-H(2)* 117.5  
*C(9)-N(2)-H(2)* 117.5  
*C(18)-N(3)-C(19)* 120.65(18)  
*C(18)-N(3)-H(3)* 119.7  
*C(19)-N(3)-H(3)* 119.7  
*C(21)-N(4)-C(22)* 121.82(18)  
*C(21)-N(4)-H(4)* 119.1  
*C(22)-N(4)-H(4)* 119.1  
*C(4)-C(1)-H(1C)* 109.5  
*C(4)-C(1)-H(1A)* 109.5  
*H(1C)-C(1)-H(1A)* 109.5  
*C(4)-C(1)-H(1B)* 109.5  
*H(1C)-C(1)-H(1B)* 109.5  
*H(1A)-C(1)-H(1B)* 109.5  
*C(4)-C(2)-H(2C)* 109.5  
*C(4)-C(2)-H(2B)* 109.5  
*H(2C)-C(2)-H(2B)* 109.5  
*C(4)-C(2)-H(2A)* 109.5  
*H(2C)-C(2)-H(2A)* 109.5  
*H(2B)-C(2)-H(2A)* 109.5  
*C(4)-C(3)-H(3A)* 109.5  
*C(4)-C(3)-H(3B)* 109.5  
*H(3A)-C(3)-H(3B)* 109.5  
*C(4)-C(3)-H(3C)* 109.5  
*H(3A)-C(3)-H(3C)* 109.5  
*H(3B)-C(3)-H(3C)* 109.5  
 O(1)-C(4)-C(3) 111.1(2)  
 O(1)-C(4)-C(1) 108.8(2)

C(3)-C(4)-C(1) 113.0(2)  
 O(1)-C(4)-C(2) 101.81(18)  
 C(3)-C(4)-C(2) 110.9(2)  
 C(1)-C(4)-C(2) 110.7(2)  
 O(2)-C(5)-N(1) 124.5(2)  
 O(2)-C(5)-O(1) 125.8(2)  
 N(1)-C(5)-O(1) 109.72(19)  
 N(1)-C(6)-C(8) 113.86(19)  
 N(1)-C(6)-C(7) 109.4(2)  
 C(8)-C(6)-C(7) 108.4(2)  
 N(1)-C(6)-H(6) 108.3  
 C(8)-C(6)-H(6) 108.3  
 C(7)-C(6)-H(6) 108.3  
 C(6)-C(7)-H(7B) 109.5  
 C(6)-C(7)-H(7A) 109.5  
 H(7B)-C(7)-H(7A) 109.5  
 C(6)-C(7)-H(7C) 109.5  
 H(7B)-C(7)-H(7C) 109.5  
 H(7A)-C(7)-H(7C) 109.5  
 O(3)-C(8)-N(2) 123.6(2)  
 O(3)-C(8)-C(6) 119.4(2)  
 N(2)-C(8)-C(6) 116.9(2)  
 N(2)-C(9)-C(14) 113.25(18)  
 N(2)-C(9)-C(10) 109.7(2)  
 C(14)-C(9)-C(10) 111.28(19)  
 N(2)-C(9)-H(9) 107.4  
 C(14)-C(9)-H(9) 107.4  
 C(10)-C(9)-H(9) 107.4  
 C(11)-C(10)-C(9) 111.9(2)  
 C(11)-C(10)-H(10B) 109.2  
 C(9)-C(10)-H(10B) 109.2  
 C(11)-C(10)-H(10A) 109.2  
 C(9)-C(10)-H(10A) 109.2  
 H(10B)-C(10)-H(10A) 107.9

|                     |            |                     |            |
|---------------------|------------|---------------------|------------|
| C(12)-C(11)-C(10)   | 110.6(2)   | N(3)-C(19)-C(21)    | 113.83(18) |
| C(12)-C(11)-H(11B)  | 109.5      | C(20)-C(19)-C(21)   | 109.12(18) |
| C(10)-C(11)-H(11B)  | 109.5      | N(3)-C(19)-H(19)    | 108.2      |
| C(12)-C(11)-H(11A)  | 109.5      | C(20)-C(19)-H(19)   | 108.2      |
| C(10)-C(11)-H(11A)  | 109.5      | C(21)-C(19)-H(19)   | 108.2      |
| H(11B)-C(11)-H(11A) | 108.1      | C(19)-C(20)-H(20B)  | 109.5      |
| C(11)-C(12)-C(13)   | 110.6(2)   | C(19)-C(20)-H(20C)  | 109.5      |
| C(11)-C(12)-H(12A)  | 109.5      | H(20B)-C(20)-H(20C) | 109.5      |
| C(13)-C(12)-H(12A)  | 109.5      | C(19)-C(20)-H(20A)  | 109.5      |
| C(11)-C(12)-H(12B)  | 109.5      | H(20B)-C(20)-H(20A) | 109.5      |
| C(13)-C(12)-H(12B)  | 109.5      | H(20C)-C(20)-H(20A) | 109.5      |
| H(12A)-C(12)-H(12B) | 108.1      | O(5)-C(21)-N(4)     | 124.0(2)   |
| C(12)-C(13)-C(14)   | 110.7(2)   | O(5)-C(21)-C(19)    | 118.12(19) |
| C(12)-C(13)-H(13B)  | 109.5      | N(4)-C(21)-C(19)    | 117.66(18) |
| C(14)-C(13)-H(13B)  | 109.5      | N(4)-C(22)-C(23)    | 109.84(17) |
| C(12)-C(13)-H(13A)  | 109.5      | N(4)-C(22)-C(27)    | 111.25(18) |
| C(14)-C(13)-H(13A)  | 109.5      | C(23)-C(22)-C(27)   | 110.80(18) |
| H(13B)-C(13)-H(13A) | 108.1      | N(4)-C(22)-H(22)    | 108.3      |
| C(9)-C(14)-C(13)    | 108.8(2)   | C(23)-C(22)-H(22)   | 108.3      |
| C(9)-C(14)-C(15)    | 111.09(18) | C(27)-C(22)-H(22)   | 108.3      |
| C(13)-C(14)-C(15)   | 115.1(2)   | C(22)-C(23)-C(24)   | 111.64(18) |
| C(9)-C(14)-H(14)    | 107.2      | C(22)-C(23)-H(23A)  | 109.3      |
| C(13)-C(14)-H(14)   | 107.2      | C(24)-C(23)-H(23A)  | 109.3      |
| C(15)-C(14)-H(14)   | 107.2      | C(22)-C(23)-H(23B)  | 109.3      |
| C(18)-C(15)-C(16)   | 109.82(18) | C(24)-C(23)-H(23B)  | 109.3      |
| C(18)-C(15)-C(14)   | 107.24(17) | H(23A)-C(23)-H(23B) | 108.0      |
| C(16)-C(15)-C(14)   | 116.33(19) | C(25)-C(24)-C(23)   | 110.70(19) |
| C(18)-C(15)-H(15)   | 107.7      | C(25)-C(24)-H(24B)  | 109.5      |
| C(16)-C(15)-H(15)   | 107.7      | C(23)-C(24)-H(24B)  | 109.5      |
| C(14)-C(15)-H(15)   | 107.7      | C(25)-C(24)-H(24A)  | 109.5      |
| C(17)-C(16)-C(15)   | 112.0(2)   | C(23)-C(24)-H(24A)  | 109.5      |
| C(17)-C(16)-H(16A)  | 109.2      | H(24B)-C(24)-H(24A) | 108.1      |
| C(15)-C(16)-H(16A)  | 109.2      | C(26)-C(25)-C(24)   | 110.80(19) |
| C(17)-C(16)-H(16B)  | 109.2      | C(26)-C(25)-H(25B)  | 109.5      |
| C(15)-C(16)-H(16B)  | 109.2      | C(24)-C(25)-H(25B)  | 109.5      |
| H(16A)-C(16)-H(16B) | 107.9      | C(26)-C(25)-H(25A)  | 109.5      |
| C(16)-C(17)-H(17B)  | 109.5      | C(24)-C(25)-H(25A)  | 109.5      |
| C(16)-C(17)-H(17C)  | 109.5      | H(25B)-C(25)-H(25A) | 108.1      |
| H(17B)-C(17)-H(17C) | 109.5      | C(25)-C(26)-C(27)   | 111.73(18) |
| C(16)-C(17)-H(17A)  | 109.5      | C(25)-C(26)-H(26A)  | 109.3      |
| H(17B)-C(17)-H(17A) | 109.5      | C(27)-C(26)-H(26A)  | 109.3      |
| H(17C)-C(17)-H(17A) | 109.5      | C(25)-C(26)-H(26B)  | 109.3      |
| O(4)-C(18)-N(3)     | 122.6(2)   | C(27)-C(26)-H(26B)  | 109.3      |
| O(4)-C(18)-C(15)    | 122.2(2)   | H(26A)-C(26)-H(26B) | 107.9      |
| N(3)-C(18)-C(15)    | 115.08(18) | C(26)-C(27)-C(22)   | 109.44(18) |
| N(3)-C(19)-C(20)    | 109.24(19) | C(26)-C(27)-C(28)   | 112.55(17) |

|                     |            |                     |            |
|---------------------|------------|---------------------|------------|
| C(22)-C(27)-C(28)   | 112.47(18) | O(7)-C(32)-C(33)    | 106.69(18) |
| C(26)-C(27)-H(27)   | 107.4      | O(7)-C(32)-H(32A)   | 110.4      |
| C(22)-C(27)-H(27)   | 107.4      | C(33)-C(32)-H(32A)  | 110.4      |
| C(28)-C(27)-H(27)   | 107.4      | O(7)-C(32)-H(32B)   | 110.4      |
| C(31)-C(28)-C(29)   | 111.56(18) | C(33)-C(32)-H(32B)  | 110.4      |
| C(31)-C(28)-C(27)   | 108.53(18) | H(32A)-C(32)-H(32B) | 108.6      |
| C(29)-C(28)-C(27)   | 115.44(19) | C(34)-C(33)-C(38)   | 119.1(3)   |
| C(31)-C(28)-H(28)   | 107.0      | C(34)-C(33)-C(32)   | 121.3(2)   |
| C(29)-C(28)-H(28)   | 107.0      | C(38)-C(33)-C(32)   | 119.6(2)   |
| C(27)-C(28)-H(28)   | 107.0      | C(33)-C(34)-C(35)   | 120.9(3)   |
| C(30)-C(29)-C(28)   | 111.9(2)   | C(33)-C(34)-H(34)   | 119.6      |
| C(30)-C(29)-H(29B)  | 109.2      | C(35)-C(34)-H(34)   | 119.6      |
| C(28)-C(29)-H(29B)  | 109.2      | C(36)-C(35)-C(34)   | 119.0(3)   |
| C(30)-C(29)-H(29A)  | 109.2      | C(36)-C(35)-H(35)   | 120.5      |
| C(28)-C(29)-H(29A)  | 109.2      | C(34)-C(35)-H(35)   | 120.5      |
| H(29B)-C(29)-H(29A) | 107.9      | C(35)-C(36)-C(37)   | 121.4(3)   |
| C(29)-C(30)-H(30B)  | 109.5      | C(35)-C(36)-Br(1)   | 119.2(2)   |
| C(29)-C(30)-H(30C)  | 109.5      | C(37)-C(36)-Br(1)   | 119.4(2)   |
| H(30B)-C(30)-H(30C) | 109.5      | C(36)-C(37)-C(38)   | 119.5(3)   |
| C(29)-C(30)-H(30A)  | 109.5      | C(36)-C(37)-H(37)   | 120.3      |
| H(30B)-C(30)-H(30A) | 109.5      | C(38)-C(37)-H(37)   | 120.3      |
| H(30C)-C(30)-H(30A) | 109.5      | C(33)-C(38)-C(37)   | 120.1(3)   |
| O(6)-C(31)-O(7)     | 123.2(2)   | C(33)-C(38)-H(38)   | 120.0      |
| O(6)-C(31)-C(28)    | 126.6(2)   | C(37)-C(38)-H(38)   | 120.0      |
| O(7)-C(31)-C(28)    | 110.26(19) |                     |            |

---

Symmetry transformations used to generate equivalent atoms:

**Table S32.** Anisotropic displacement parameters ( $\text{\AA}^2 \times 10^3$ ) for gellman126. The anisotropic displacement factor exponent takes the form:  $-2\pi^2 [ h^2 a^{*2} U^{11} + \dots + 2 h k a^* b^* U^{12} ]$

|       | U <sup>11</sup> | U <sup>22</sup> | U <sup>33</sup> | U <sup>23</sup> | U <sup>13</sup> | U <sup>12</sup> |
|-------|-----------------|-----------------|-----------------|-----------------|-----------------|-----------------|
| Br(1) | 50(1)           | 47(1)           | 81(1)           | 29(1)           | -14(1)          | 11(1)           |
| O(1)  | 36(1)           | 32(1)           | 23(1)           | -2(1)           | 2(1)            | 21(1)           |
| O(2)  | 37(1)           | 33(1)           | 30(1)           | -2(1)           | 0(1)            | 23(1)           |
| O(3)  | 40(1)           | 32(1)           | 32(1)           | -7(1)           | -13(1)          | 24(1)           |
| O(4)  | 34(1)           | 27(1)           | 34(1)           | 2(1)            | -1(1)           | 18(1)           |
| O(5)  | 32(1)           | 29(1)           | 34(1)           | -10(1)          | -9(1)           | 18(1)           |
| O(6)  | 24(1)           | 45(1)           | 35(1)           | 0(1)            | -3(1)           | 13(1)           |
| O(7)  | 25(1)           | 32(1)           | 35(1)           | 4(1)            | 0(1)            | 10(1)           |
| N(1)  | 34(1)           | 29(1)           | 27(1)           | -1(1)           | 1(1)            | 19(1)           |
| N(2)  | 32(1)           | 28(1)           | 23(1)           | -1(1)           | -4(1)           | 20(1)           |
| N(3)  | 27(1)           | 24(1)           | 24(1)           | -4(1)           | -4(1)           | 15(1)           |
| N(4)  | 21(1)           | 24(1)           | 27(1)           | -3(1)           | -4(1)           | 12(1)           |
| C(1)  | 67(2)           | 61(2)           | 37(2)           | 5(1)            | 19(1)           | 44(2)           |
| C(2)  | 69(2)           | 47(2)           | 27(1)           | -5(1)           | -5(1)           | 39(1)           |
| C(3)  | 58(2)           | 39(1)           | 41(2)           | -8(1)           | -17(1)          | 27(1)           |
| C(4)  | 44(1)           | 36(1)           | 24(1)           | -5(1)           | 1(1)            | 25(1)           |
| C(5)  | 24(1)           | 28(1)           | 29(1)           | 0(1)            | 3(1)            | 12(1)           |
| C(6)  | 32(1)           | 31(1)           | 28(1)           | -6(1)           | -5(1)           | 16(1)           |
| C(7)  | 42(1)           | 34(1)           | 38(2)           | -10(1)          | -9(1)           | 8(1)            |
| C(8)  | 33(1)           | 26(1)           | 25(1)           | -8(1)           | -5(1)           | 18(1)           |
| C(9)  | 34(1)           | 39(1)           | 23(1)           | 3(1)            | 1(1)            | 25(1)           |
| C(10) | 66(2)           | 56(2)           | 21(1)           | 2(1)            | 3(1)            | 48(2)           |
| C(11) | 71(2)           | 93(2)           | 24(1)           | 15(1)           | 13(1)           | 64(2)           |
| C(12) | 50(2)           | 73(2)           | 30(1)           | 18(1)           | 11(1)           | 37(2)           |
| C(13) | 36(1)           | 48(1)           | 34(1)           | 14(1)           | 3(1)            | 22(1)           |
| C(14) | 28(1)           | 37(1)           | 25(1)           | 2(1)            | -5(1)           | 20(1)           |
| C(15) | 26(1)           | 26(1)           | 25(1)           | 2(1)            | -2(1)           | 14(1)           |
| C(16) | 30(1)           | 34(1)           | 41(2)           | -3(1)           | -10(1)          | 18(1)           |
| C(17) | 44(2)           | 44(2)           | 42(2)           | -14(1)          | -17(1)          | 19(1)           |
| C(18) | 26(1)           | 25(1)           | 24(1)           | -3(1)           | -4(1)           | 14(1)           |
| C(19) | 28(1)           | 30(1)           | 27(1)           | -9(1)           | -5(1)           | 17(1)           |
| C(20) | 35(1)           | 53(2)           | 29(1)           | -1(1)           | 3(1)            | 27(1)           |
| C(21) | 20(1)           | 24(1)           | 29(1)           | -4(1)           | -2(1)           | 11(1)           |
| C(22) | 23(1)           | 21(1)           | 29(1)           | 0(1)            | -2(1)           | 12(1)           |
| C(23) | 25(1)           | 25(1)           | 30(1)           | 1(1)            | -1(1)           | 10(1)           |
| C(24) | 34(1)           | 36(1)           | 26(1)           | 4(1)            | 6(1)            | 20(1)           |
| C(25) | 32(1)           | 37(1)           | 25(1)           | -3(1)           | -3(1)           | 21(1)           |
| C(26) | 24(1)           | 34(1)           | 27(1)           | -4(1)           | -4(1)           | 15(1)           |
| C(27) | 23(1)           | 24(1)           | 24(1)           | -2(1)           | 0(1)            | 12(1)           |
| C(28) | 24(1)           | 33(1)           | 23(1)           | -4(1)           | -2(1)           | 15(1)           |
| C(29) | 28(1)           | 39(1)           | 33(1)           | -3(1)           | -1(1)           | 20(1)           |

|       |       |       |       |       |       |       |
|-------|-------|-------|-------|-------|-------|-------|
| C(30) | 41(1) | 52(2) | 40(2) | -7(1) | 2(1)  | 31(1) |
| C(31) | 26(1) | 38(1) | 23(1) | -2(1) | 3(1)  | 16(1) |
| C(32) | 26(1) | 32(1) | 36(1) | -1(1) | -1(1) | 8(1)  |
| C(33) | 24(1) | 34(1) | 33(1) | 6(1)  | 4(1)  | 7(1)  |
| C(34) | 31(1) | 36(1) | 44(2) | -2(1) | -2(1) | 9(1)  |
| C(35) | 34(1) | 35(1) | 61(2) | 8(1)  | -1(1) | 11(1) |
| C(36) | 32(1) | 44(2) | 46(2) | 23(1) | 1(1)  | 10(1) |
| C(37) | 33(1) | 37(1) | 35(1) | 7(1)  | 2(1)  | 6(1)  |
| C(38) | 32(1) | 30(1) | 34(1) | 4(1)  | 4(1)  | 7(1)  |

**Table S33.** Hydrogen coordinates (  $\times 10^4$ ) and isotropic displacement parameters ( $\text{\AA}^2 \times 10^{-3}$ ) for gellman126.

|        | x    | y    | z     | U(eq) |    |
|--------|------|------|-------|-------|----|
| H(1)   | 6280 | 6286 | 6214  | 34    |    |
| H(2)   | 7141 | 7204 | 5171  | 31    |    |
| H(3)   | 6542 | 8188 | 5924  | 29    |    |
| H(4)   | 6050 | 8122 | 3725  | 28    |    |
| H(1C)  | 6109 | 7038 | 10638 | 74    |    |
| H(1A)  | 5755 | 6473 | 9749  | 74    |    |
| H(1B)  | 5889 | 7131 | 9345  | 74    |    |
| H(2C)  | 6942 | 6793 | 10776 | 65    |    |
| H(2B)  | 7300 | 6797 | 9588  | 65    |    |
| H(2A)  | 6626 | 6252 | 9821  | 65    |    |
| H(3A)  | 6925 | 7925 | 8828  | 67    |    |
| H(3B)  | 7455 | 7767 | 8687  | 67    |    |
| H(3C)  | 7253 | 7859 | 10000 | 67    |    |
| H(6)   | 5693 | 6828 | 5247  | 36    |    |
| H(7B)  | 5584 | 6241 | 3511  | 64    |    |
| H(7A)  | 5392 | 5826 | 4694  | 64    |    |
| H(7C)  | 6036 | 6043 | 4079  | 64    |    |
| H(9)   | 7977 | 7894 | 4346  | 34    |    |
| H(10B) |      | 7606 | 7243  | 2669  | 48 |
| H(10A) |      | 7242 | 7567  | 2215  | 48 |
| H(11B) |      | 8537 | 8122  | 2290  | 63 |
| H(11A) |      | 8137 | 7951  | 1086  | 63 |
| H(12A) |      | 7862 | 8684  | 1519  | 57 |
| H(12B) |      | 8586 | 9002  | 1502  | 57 |
| H(13B) |      | 8276 | 9330  | 3220  | 47 |
| H(13A) |      | 8600 | 8961  | 3643  | 47 |
| H(14)  | 7309 | 8441 | 3468  | 33    |    |
| H(15)  | 7435 | 8309 | 5752  | 30    |    |
| H(16A) |      | 8517 | 9015  | 5732  | 41 |

|            |      |      |      |    |
|------------|------|------|------|----|
| H(16B)     | 8372 | 9540 | 5394 | 41 |
| H(17B)     | 7823 | 9351 | 7241 | 67 |
| H(17C)     | 8519 | 9557 | 7478 | 67 |
| H(17A)     | 8011 | 8858 | 7584 | 67 |
| H(19) 6333 | 9127 | 6024 | 33   |    |
| H(20B)     | 5304 | 8370 | 6374 | 55 |
| H(20C)     | 5764 | 8303 | 7254 | 55 |
| H(20A)     | 5483 | 7862 | 6118 | 55 |
| H(22) 5574 | 8663 | 2244 | 29   |    |
| H(23A)     | 6065 | 7913 | 1539 | 33 |
| H(23B)     | 6411 | 8635 | 1417 | 33 |
| H(24B)     | 5711 | 8575 | -48  | 37 |
| H(24A)     | 5984 | 8160 | -476 | 37 |
| H(25B)     | 4904 | 7640 | -704 | 35 |
| H(25A)     | 5110 | 7279 | 184  | 35 |
| H(26A)     | 4287 | 7320 | 1054 | 34 |
| H(26B)     | 4644 | 8043 | 950  | 34 |
| H(27) 5014 | 7369 | 2450 | 28   |    |
| H(28) 4809 | 7863 | 4120 | 32   |    |
| H(29B)     | 4631 | 8552 | 2864 | 38 |
| H(29A)     | 3971 | 7986 | 2610 | 38 |
| H(30B)     | 3922 | 8557 | 4232 | 61 |
| H(30C)     | 4417 | 8473 | 4957 | 61 |
| H(30A)     | 3760 | 7902 | 4713 | 61 |
| H(32A)     | 3679 | 5920 | 3815 | 41 |
| H(32B)     | 3452 | 6144 | 4953 | 41 |
| H(34) 3827 | 5125 | 4613 | 49   |    |
| H(35) 4290 | 4775 | 5960 | 56   |    |
| H(37) 5009 | 6357 | 7762 | 48   |    |
| H(38) 4506 | 6690 | 6475 | 43   |    |

**Table S34.** Torsion angles [°] for gellman126.

|                     |             |                         |             |
|---------------------|-------------|-------------------------|-------------|
| C(5)-O(1)-C(4)-C(3) | -57.5(3)    | C(8)-N(2)-C(9)-C(14)    | 56.9(3)     |
| C(5)-O(1)-C(4)-C(1) | 67.5(3)     | C(8)-N(2)-C(9)-C(10)    | -68.1(3)    |
| C(5)-O(1)-C(4)-C(2) | -175.6(2)   | N(2)-C(9)-C(10)-C(11)   | -178.70(19) |
| C(6)-N(1)-C(5)-O(2) | -0.2(3)     | C(14)-C(9)-C(10)-C(11)  | 55.2(3)     |
| C(6)-N(1)-C(5)-O(1) | -179.74(19) | C(9)-C(10)-C(11)-C(12)  | -54.9(3)    |
| C(4)-O(1)-C(5)-O(2) | 5.3(3)      | C(10)-C(11)-C(12)-C(13) | 57.1(3)     |
| C(4)-O(1)-C(5)-N(1) | -175.10(19) | C(11)-C(12)-C(13)-C(14) | -59.9(3)    |
| C(5)-N(1)-C(6)-C(8) | 76.5(3)     | N(2)-C(9)-C(14)-C(13)   | 179.71(19)  |
| C(5)-N(1)-C(6)-C(7) | -162.0(2)   | C(10)-C(9)-C(14)-C(13)  | -56.1(3)    |
| C(9)-N(2)-C(8)-O(3) | -1.0(3)     | N(2)-C(9)-C(14)-C(15)   | 52.0(2)     |
| C(9)-N(2)-C(8)-C(6) | 175.9(2)    | C(10)-C(9)-C(14)-C(15)  | 176.2(2)    |
| N(1)-C(6)-C(8)-O(3) | -162.98(19) | C(12)-C(13)-C(14)-C(9)  | 58.7(3)     |
| C(7)-C(6)-C(8)-O(3) | 75.0(3)     | C(12)-C(13)-C(14)-C(15) | -175.9(2)   |
| N(1)-C(6)-C(8)-N(2) | 19.9(3)     | C(9)-C(14)-C(15)-C(18)  | -133.55(18) |
| C(7)-C(6)-C(8)-N(2) | -102.1(2)   | C(13)-C(14)-C(15)-C(18) | 102.3(2)    |

|                         |             |                         |           |
|-------------------------|-------------|-------------------------|-----------|
| C(9)-C(14)-C(15)-C(16)  | 103.1(2)    | C(35)-C(36)-C(37)-C(38) | -0.5(4)   |
| C(13)-C(14)-C(15)-C(16) | -21.1(3)    | Br(1)-C(36)-C(37)-C(38) | 178.9(2)  |
| C(18)-C(15)-C(16)-C(17) | 67.1(3)     | C(34)-C(33)-C(38)-C(37) | 1.6(4)    |
| C(14)-C(15)-C(16)-C(17) | -170.9(2)   | C(32)-C(33)-C(38)-C(37) | -179.2(2) |
| C(19)-N(3)-C(18)-O(4)   | -2.8(3)     | C(36)-C(37)-C(38)-C(33) | -1.5(4)   |
| C(19)-N(3)-C(18)-C(15)  | -179.59(19) |                         |           |
| C(16)-C(15)-C(18)-O(4)  | 54.1(3)     |                         |           |
| C(14)-C(15)-C(18)-O(4)  | -73.2(3)    |                         |           |
| C(16)-C(15)-C(18)-N(3)  | -129.1(2)   |                         |           |
| C(14)-C(15)-C(18)-N(3)  | 103.7(2)    |                         |           |
| C(18)-N(3)-C(19)-C(20)  | -168.5(2)   |                         |           |
| C(18)-N(3)-C(19)-C(21)  | 69.3(3)     |                         |           |
| C(22)-N(4)-C(21)-O(5)   | -1.9(3)     |                         |           |
| C(22)-N(4)-C(21)-C(19)  | 172.50(18)  |                         |           |
| N(3)-C(19)-C(21)-O(5)   | -151.5(2)   |                         |           |
| C(20)-C(19)-C(21)-O(5)  | 86.2(2)     |                         |           |
| N(3)-C(19)-C(21)-N(4)   | 33.7(3)     |                         |           |
| C(20)-C(19)-C(21)-N(4)  | -88.6(2)    |                         |           |
| C(21)-N(4)-C(22)-C(23)  | 135.3(2)    |                         |           |
| C(21)-N(4)-C(22)-C(27)  | -101.7(2)   |                         |           |
| N(4)-C(22)-C(23)-C(24)  | -179.92(17) |                         |           |
| C(27)-C(22)-C(23)-C(24) | 56.8(2)     |                         |           |
| C(22)-C(23)-C(24)-C(25) | -55.7(2)    |                         |           |
| C(23)-C(24)-C(25)-C(26) | 55.2(3)     |                         |           |
| C(24)-C(25)-C(26)-C(27) | -57.0(3)    |                         |           |
| C(25)-C(26)-C(27)-C(22) | 57.3(2)     |                         |           |
| C(25)-C(26)-C(27)-C(28) | -176.89(19) |                         |           |
| N(4)-C(22)-C(27)-C(26)  | -179.24(17) |                         |           |
| C(23)-C(22)-C(27)-C(26) | -56.7(2)    |                         |           |
| N(4)-C(22)-C(27)-C(28)  | 54.9(2)     |                         |           |
| C(23)-C(22)-C(27)-C(28) | 177.38(18)  |                         |           |
| C(26)-C(27)-C(28)-C(31) | 78.2(2)     |                         |           |
| C(22)-C(27)-C(28)-C(31) | -157.63(18) |                         |           |
| C(26)-C(27)-C(28)-C(29) | -47.9(3)    |                         |           |
| C(22)-C(27)-C(28)-C(29) | 76.3(2)     |                         |           |
| C(31)-C(28)-C(29)-C(30) | 73.4(3)     |                         |           |
| C(27)-C(28)-C(29)-C(30) | -162.1(2)   |                         |           |
| C(32)-O(7)-C(31)-O(6)   | -2.2(3)     |                         |           |
| C(32)-O(7)-C(31)-C(28)  | 179.09(19)  |                         |           |
| C(29)-C(28)-C(31)-O(6)  | 31.5(3)     |                         |           |
| C(27)-C(28)-C(31)-O(6)  | -96.8(3)    |                         |           |
| C(29)-C(28)-C(31)-O(7)  | -149.9(2)   |                         |           |
| C(27)-C(28)-C(31)-O(7)  | 81.8(2)     |                         |           |
| C(31)-O(7)-C(32)-C(33)  | -176.8(2)   |                         |           |
| O(7)-C(32)-C(33)-C(34)  | -136.3(2)   |                         |           |
| O(7)-C(32)-C(33)-C(38)  | 44.5(3)     |                         |           |
| C(38)-C(33)-C(34)-C(35) | 0.1(4)      |                         |           |
| C(32)-C(33)-C(34)-C(35) | -179.1(2)   |                         |           |
| C(33)-C(34)-C(35)-C(36) | -2.0(4)     |                         |           |
| C(34)-C(35)-C(36)-C(37) | 2.2(4)      |                         |           |
| C(34)-C(35)-C(36)-Br(1) | -177.3(2)   |                         |           |

---

Symmetry transformations used to generate equivalent atoms:

## Crystallographic Experimental Section for Compound 1c

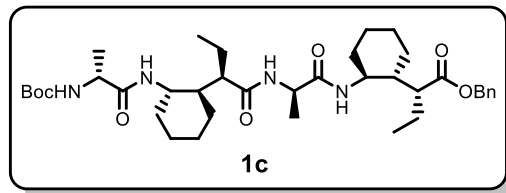

### Data Collection

A colorless crystal with approximate dimensions 0.43 x 0.28 x 0.11 mm<sup>3</sup> was selected under oil under ambient conditions and attached to the tip of a MiTeGen MicroMount©. The crystal was mounted in a stream of cold nitrogen at 100(1) K and centered in the X-ray beam by using a video camera.

The crystal evaluation and data collection were performed on a Bruker SMART APEXII diffractometer with Cu K $\alpha$  ( $\lambda = 1.54178 \text{ \AA}$ ) radiation and the diffractometer to crystal distance of 4.03 cm.

The initial cell constants were obtained from three series of  $\omega$  scans at different starting angles. Each series consisted of 41 frames collected at intervals of 0.6° in a 25° range about  $\omega$  with the exposure time of 10 seconds per frame. The reflections were successfully indexed by an automated indexing routine built in the APEXII program. The final cell constants were calculated from a set of 9700 strong reflections from the actual data collection.

The data were collected by using the full sphere data collection routine to survey the reciprocal space to the extent of a full sphere to a resolution of 0.82 Å. A total of 125656 data were harvested by collecting 19 sets of frames with 0.5° scans in  $\omega$  with an exposure time 30-60 sec per frame. These highly redundant datasets were corrected for Lorentz and polarization effects. The absorption correction was based on fitting a function to the empirical transmission surface as sampled by multiple equivalent measurements. [1]

### Structure Solution and Refinement

The systematic absences in the diffraction data were uniquely consistent for the space group  $P2_12_12_1$  that yielded chemically reasonable and computationally stable results of refinement [2,3].

A successful solution by the direct methods provided most non-hydrogen atoms from the *E*-map. The remaining non-hydrogen atoms were located in an alternating series of least-squares cycles and difference Fourier maps. All non-hydrogen atoms were refined with anisotropic displacement coefficients. All hydrogen atoms were included in the structure factor calculation at idealized positions and were allowed to ride on the neighboring atoms with relative isotropic displacement coefficients.

There is also one molecule of solvate water per two molecules of the foldamer in the asymmetric unit. The water molecule was refined with an idealized geometry.



One phenyl group is disordered over two positions with the major component being occupied 62.3(4)% of the time. Restraints and constraints were used for the refinement of the disordered phenyl groups.

The final least-squares refinement of 911 parameters against 15507 data resulted in residuals  $R$  (based on  $F^2$  for  $I \geq 2\sigma$ ) and  $wR$  (based on  $F^2$  for all data) of 0.0405 and 0.1000, respectively. The final difference Fourier map was featureless.

The molecular diagram is drawn with 40% probability ellipsoids.

## References

- [1] Bruker-AXS. (2007) APEX2, SADABS, and SAINT Software Reference Manuals. Bruker-AXS, Madison, Wisconsin, USA.
- [2] Sheldrick, G. M. (2008) SHELXL. *Acta Cryst.* **A64**, 112-122.
- [3] Dolomanov, O.V.; Bourhis, L.J.; Gildea, R.J.; Howard, J.A.K.; Puschmann, H. "OLEX2: a complete structure solution, refinement and analysis program". *J. Appl. Cryst.* (2009) **42**, 339-341.

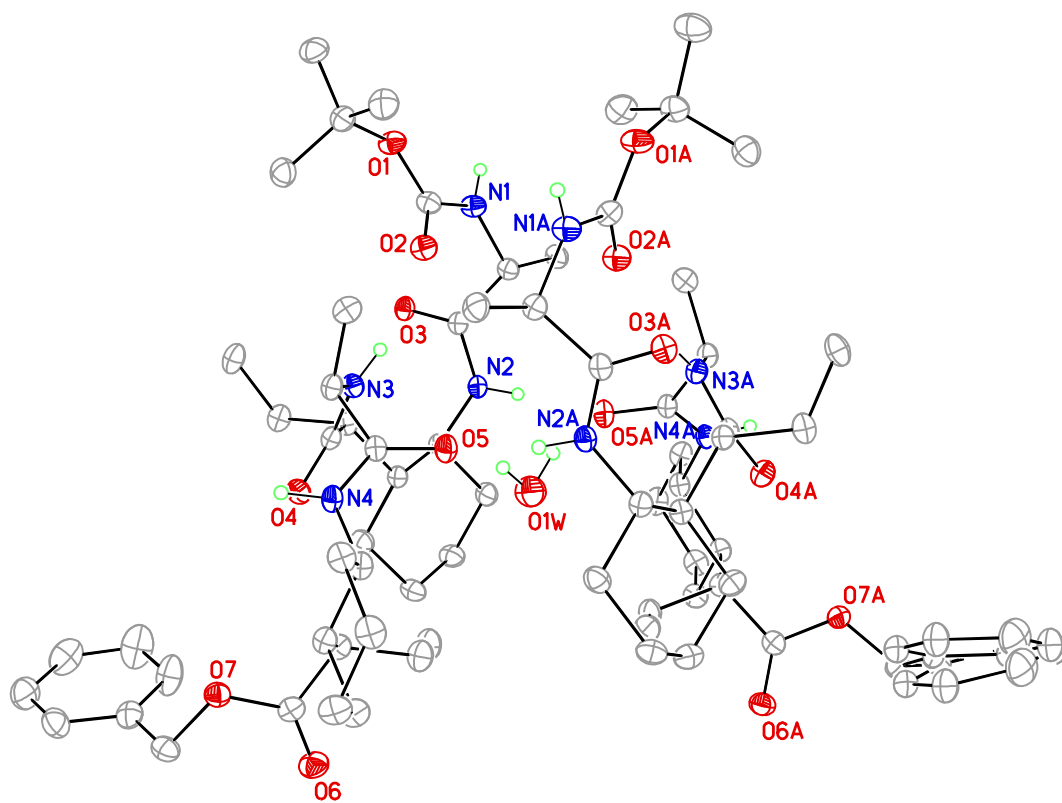

**Figure S22.** A molecular drawing of the unit cell content (note the water molecule and disorder). All H atoms connected to C atoms are omitted. The molecular diagram is drawn with 30% probability ellipsoids.

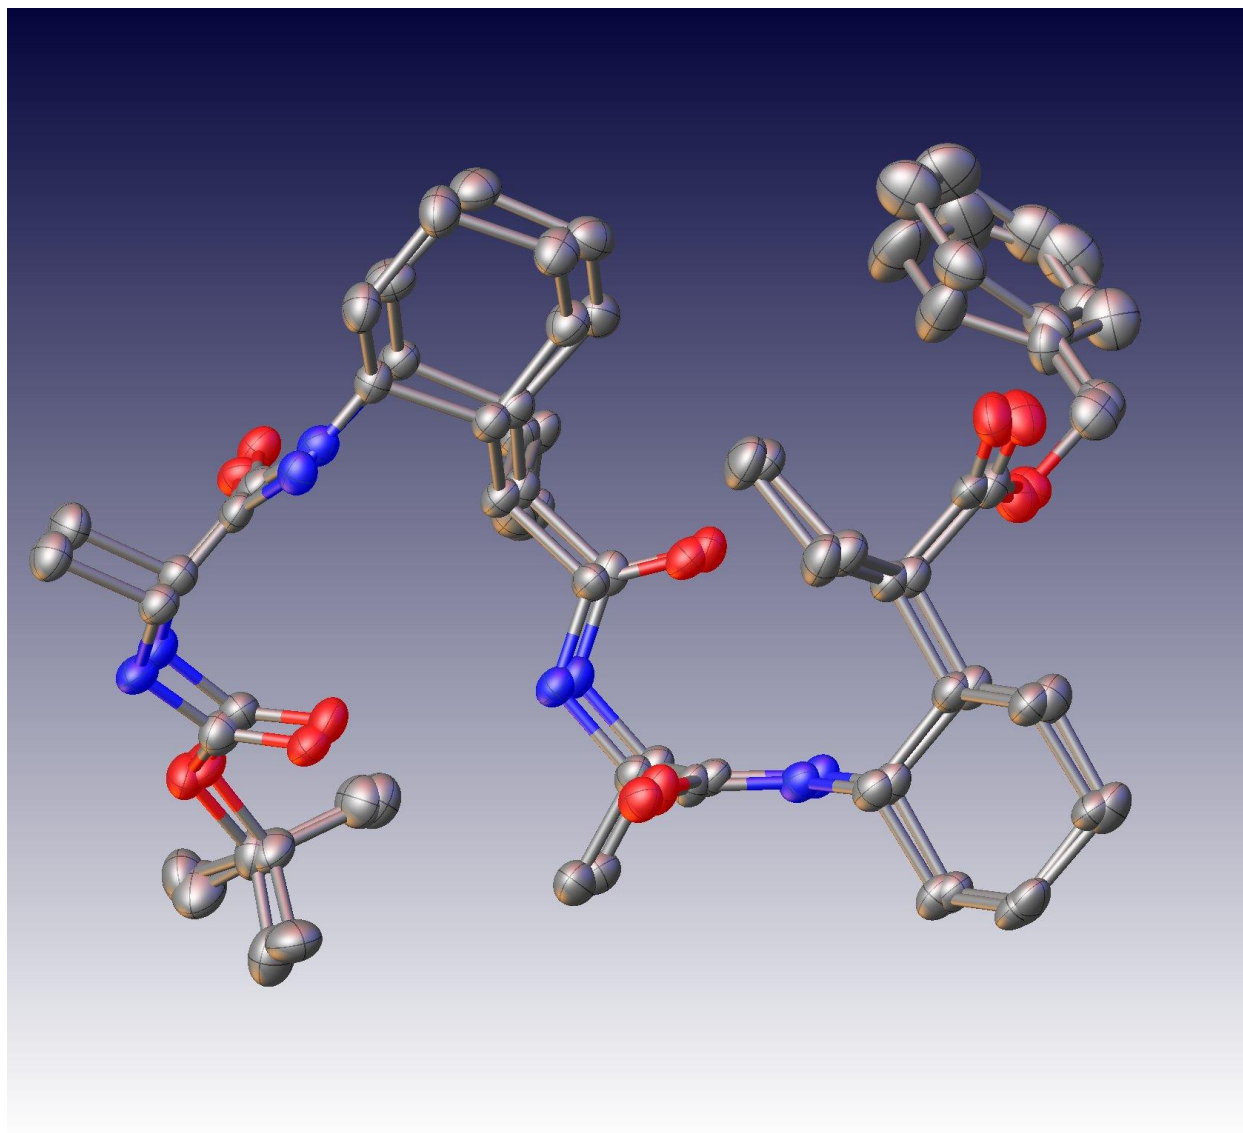

**Figure S23.** A molecular drawing of the two foldamer molecules overlapped. All H atoms and connected to C atoms are omitted. The molecular diagram is drawn with 50% probability ellipsoids.

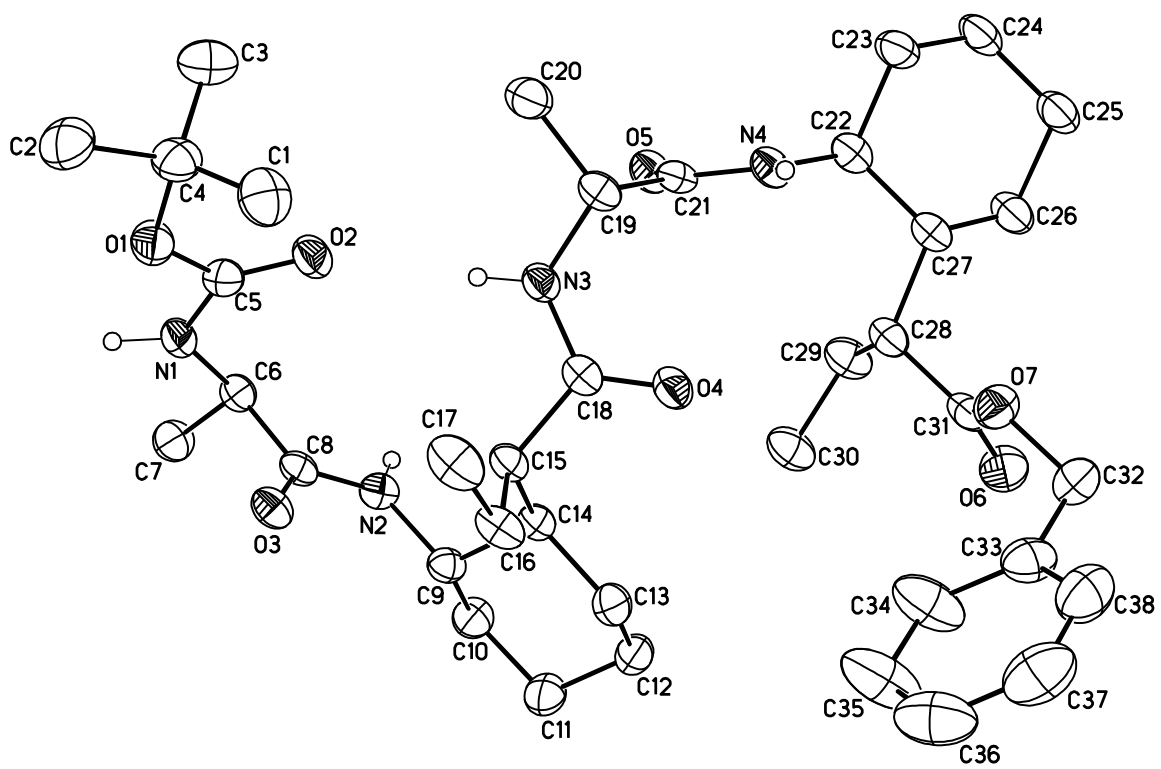

**Figure S24.** A molecular drawing of the first foldamer molecule. All H atoms connected to C atoms are omitted. The molecular diagram is drawn with 50% probability ellipsoids.

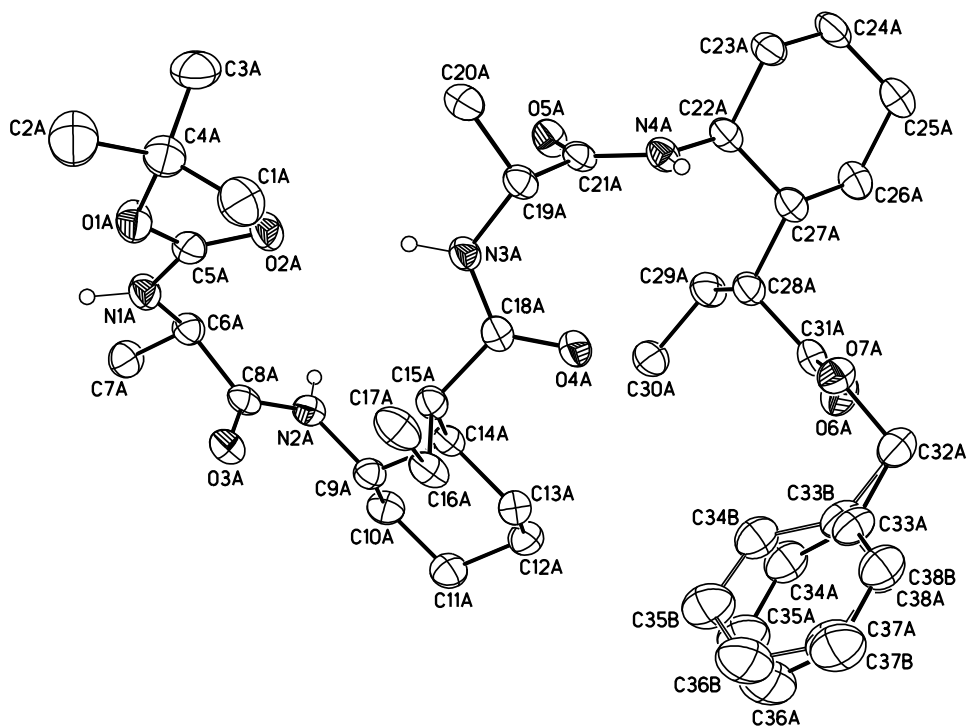

**Figure S25.** A molecular drawing of the second foldamer molecule. All H atoms connected to C atoms and the minor components of the disordered atoms are omitted. The molecular diagram is drawn with 50% probability ellipsoids.

**Table S35.** Crystal data and structure refinement for gellman124a.

| <b>Identification code</b>                    | <b>gellman124a</b>                                                                   |          |
|-----------------------------------------------|--------------------------------------------------------------------------------------|----------|
| <b>Empirical formula</b>                      | C <sub>38</sub> H <sub>60</sub> N <sub>4</sub> O <sub>7</sub> · 1/2 H <sub>2</sub> O |          |
| <b>Formula weight</b>                         | 693.91                                                                               |          |
| <b>Temperature</b>                            | 100(1) K                                                                             |          |
| <b>Wavelength</b>                             | 1.54178 Å                                                                            |          |
| <b>Crystal system</b>                         | Orthorhombic                                                                         |          |
| <b>Space group</b>                            | P2 <sub>1</sub> 2 <sub>1</sub> 2 <sub>1</sub>                                        |          |
| <b>Unit cell dimensions</b>                   | a = 16.5265(5) Å                                                                     | α = 90°. |
|                                               | b = 17.3446(5) Å                                                                     | β = 90°. |
|                                               | c = 28.1866(9) Å                                                                     | γ = 90°. |
| <b>Volume</b>                                 | 8079.6(4) Å <sup>3</sup>                                                             |          |
| <b>Z</b>                                      | 8                                                                                    |          |
| <b>Density (calculated)</b>                   | 1.141 Mg/m <sup>3</sup>                                                              |          |
| <b>Absorption coefficient</b>                 | 0.636 mm <sup>-1</sup>                                                               |          |
| <b>F(000)</b>                                 | 3016                                                                                 |          |
| <b>Crystal size</b>                           | 0.43 x 0.28 x 0.11 mm <sup>3</sup>                                                   |          |
| <b>Theta range for data collection</b>        | 2.99 to 71.68°.                                                                      |          |
| <b>Index ranges</b>                           | -17<=h<=19, -21<=k<=21, -34<=l<=33                                                   |          |
| <b>Reflections collected</b>                  | 125656                                                                               |          |
| <b>Independent reflections</b>                | 15507 [R(int) = 0.0523]                                                              |          |
| <b>Completeness to theta = 67.00°</b>         | 99.5 %                                                                               |          |
| <b>Absorption correction</b>                  | Empirical with SADABS                                                                |          |
| <b>Max. and min. transmission</b>             | 0.9316 and 0.7714                                                                    |          |
| <b>Refinement method</b>                      | Full-matrix least-squares on F <sup>2</sup>                                          |          |
| <b>Data / restraints / parameters</b>         | 15507 / 1 / 911                                                                      |          |
| <b>Goodness-of-fit on F<sup>2</sup></b>       | 1.039                                                                                |          |
| <b>Final R indices [I&gt;2sigma(I)]</b>       | R1 = 0.0405, wR2 = 0.0917                                                            |          |
| <b>R indices (all data)</b>                   | R1 = 0.0540, wR2 = 0.1000                                                            |          |
| <b>Absolute structure parameter (Flack x)</b> | -0.06(11)                                                                            |          |
| <b>Absolute structure parameter (Hooft y)</b> | -0.09(04)                                                                            |          |
| <b>Largest diff. peak and hole</b>            | 0.211 and -0.185 e.Å <sup>-3</sup>                                                   |          |

**Table S36.** Atomic coordinates ( $\times 10^4$ ) and equivalent isotropic displacement parameters ( $\text{\AA}^2 \times 10^3$ ) for gellman124a.  $U(\text{eq})$  is defined as one third of the trace of the orthogonalized  $U^{ij}$  tensor.

|       | x        | y         | z        | U(eq) |
|-------|----------|-----------|----------|-------|
| O(1)  | -780(1)  | -9264(1)  | -1540(1) | 38(1) |
| O(2)  | -1355(1) | -9658(1)  | -843(1)  | 36(1) |
| O(3)  | -210(1)  | -8247(1)  | -336(1)  | 31(1) |
| O(4)  | -379(1)  | -11035(1) | 689(1)   | 32(1) |
| O(5)  | -2558(1) | -11469(1) | 326(1)   | 34(1) |
| O(6)  | -946(1)  | -11926(1) | 2371(1)  | 44(1) |
| O(7)  | -208(1)  | -12582(1) | 1837(1)  | 36(1) |
| N(1)  | -1314(1) | -8395(1)  | -1061(1) | 32(1) |
| N(2)  | -1205(1) | -8329(1)  | 212(1)   | 28(1) |
| N(3)  | -1021(1) | -10797(1) | -2(1)    | 28(1) |
| N(4)  | -1718(1) | -12433(1) | 559(1)   | 28(1) |
| C(1)  | -73(2)   | -10486(1) | -1398(1) | 46(1) |
| C(2)  | -182(2)  | -9862(1)  | -2190(1) | 48(1) |
| C(3)  | -1414(2) | -10451(1) | -1820(1) | 50(1) |
| C(4)  | -620(1)  | -10040(1) | -1729(1) | 38(1) |
| C(5)  | -1160(1) | -9158(1)  | -1124(1) | 32(1) |
| C(6)  | -1586(1) | -8121(1)  | -605(1)  | 29(1) |
| C(7)  | -1793(1) | -7261(1)  | -642(1)  | 36(1) |
| C(8)  | -935(1)  | -8243(1)  | -231(1)  | 27(1) |
| C(9)  | -678(1)  | -8420(1)  | 624(1)   | 28(1) |
| C(10) | -1024(1) | -7929(1)  | 1027(1)  | 35(1) |
| C(11) | -535(2)  | -8001(1)  | 1482(1)  | 39(1) |
| C(12) | -466(2)  | -8845(1)  | 1629(1)  | 38(1) |
| C(13) | -101(1)  | -9325(1)  | 1229(1)  | 34(1) |
| C(14) | -599(1)  | -9272(1)  | 769(1)   | 27(1) |
| C(15) | -254(1)  | -9758(1)  | 355(1)   | 28(1) |
| C(16) | 671(1)   | -9767(1)  | 325(1)   | 35(1) |
| C(17) | 972(1)   | -10172(1) | -122(1)  | 43(1) |
| C(18) | -559(1)  | -10586(1) | 371(1)   | 27(1) |
| C(19) | -1263(1) | -11597(1) | -64(1)   | 29(1) |
| C(20) | -1588(1) | -11719(1) | -565(1)  | 38(1) |
| C(21) | -1908(1) | -11824(1) | 300(1)   | 26(1) |
| C(22) | -2233(1) | -12765(1) | 925(1)   | 31(1) |
| C(23) | -2520(1) | -13565(1) | 771(1)   | 35(1) |
| C(24) | -3043(1) | -13945(1) | 1150(1)  | 39(1) |
| C(25) | -2606(2) | -13983(1) | 1623(1)  | 40(1) |
| C(26) | -2318(1) | -13187(1) | 1775(1)  | 38(1) |
| C(27) | -1774(1) | -12818(1) | 1398(1)  | 30(1) |
| C(28) | -1426(1) | -12029(1) | 1560(1)  | 31(1) |
| C(29) | -2066(1) | -11421(1) | 1683(1)  | 41(1) |
| C(30) | -1697(2) | -10615(1) | 1735(1)  | 44(1) |
| C(31) | -857(1)  | -12154(1) | 1971(1)  | 32(1) |
| C(32) | 409(1)   | -12736(1) | 2194(1)  | 41(1) |
| C(33) | 1173(2)  | -12324(1) | 2066(1)  | 41(1) |
| C(34) | 1157(2)  | -11568(1) | 1909(1)  | 62(1) |
| C(35) | 1864(2)  | -11197(2) | 1790(1)  | 77(1) |
| C(36) | 2597(2)  | -11575(2) | 1834(1)  | 68(1) |
| C(37) | 2614(2)  | -12319(2) | 1979(1)  | 62(1) |
| C(38) | 1909(2)  | -12691(2) | 2095(1)  | 52(1) |
| O(1A) | -4557(1) | -10615(1) | -1535(1) | 39(1) |
| O(2A) | -4096(1) | -10286(1) | -798(1)  | 35(1) |

|        |          |           |          |       |
|--------|----------|-----------|----------|-------|
| O(3A)  | -5297(1) | -11748(1) | -338(1)  | 31(1) |
| O(4A)  | -5109(1) | -8939(1)  | 704(1)   | 34(1) |
| O(5A)  | -2938(1) | -8465(1)  | 374(1)   | 34(1) |
| O(6A)  | -4612(1) | -8060(1)  | 2408(1)  | 45(1) |
| O(7A)  | -5380(1) | -7506(1)  | 1848(1)  | 35(1) |
| N(1A)  | -4155(1) | -11531(1) | -1046(1) | 32(1) |
| N(2A)  | -4324(1) | -11665(1) | 223(1)   | 28(1) |
| N(3A)  | -4445(1) | -9131(1)  | 17(1)    | 28(1) |
| N(4A)  | -3776(1) | -7505(1)  | 614(1)   | 28(1) |
| C(1A)  | -5255(2) | -9386(1)  | -1419(1) | 46(1) |
| C(2A)  | -4936(2) | -9935(1)  | -2212(1) | 56(1) |
| C(3A)  | -3811(2) | -9429(1)  | -1711(1) | 49(1) |
| C(4A)  | -4631(2) | -9816(1)  | -1711(1) | 38(1) |
| C(5A)  | -4265(1) | -10762(1) | -1100(1) | 31(1) |
| C(6A)  | -3909(1) | -11842(1) | -593(1)  | 30(1) |
| C(7A)  | -3710(1) | -12699(1) | -648(1)  | 37(1) |
| C(8A)  | -4577(1) | -11742(1) | -226(1)  | 27(1) |
| C(9A)  | -4868(1) | -11554(1) | 625(1)   | 29(1) |
| C(10A) | -4584(1) | -12059(1) | 1036(1)  | 36(1) |
| C(11A) | -5110(2) | -11957(1) | 1476(1)  | 39(1) |
| C(12A) | -5121(1) | -11108(1) | 1623(1)  | 39(1) |
| C(13A) | -5432(1) | -10609(1) | 1216(1)  | 35(1) |
| C(14A) | -4914(1) | -10696(1) | 767(1)   | 28(1) |
| C(15A) | -5210(1) | -10200(1) | 343(1)   | 28(1) |
| C(16A) | -6133(1) | -10184(1) | 275(1)   | 34(1) |
| C(17A) | -6378(1) | -9778(1)  | -183(1)  | 40(1) |
| C(18A) | -4912(1) | -9373(1)  | 378(1)   | 27(1) |
| C(19A) | -4220(1) | -8325(1)  | -25(1)   | 29(1) |
| C(20A) | -3900(1) | -8158(1)  | -522(1)  | 35(1) |
| C(21A) | -3583(1) | -8108(1)  | 347(1)   | 26(1) |
| C(22A) | -3272(1) | -7205(1)  | 996(1)   | 30(1) |
| C(23A) | -2937(1) | -6413(1)  | 858(1)   | 35(1) |
| C(24A) | -2416(1) | -6076(1)  | 1254(1)  | 39(1) |
| C(25A) | -2898(1) | -6019(1)  | 1712(1)  | 39(1) |
| C(26A) | -3233(1) | -6802(1)  | 1853(1)  | 38(1) |
| C(27A) | -3754(1) | -7159(1)  | 1461(1)  | 31(1) |
| C(28A) | -4099(1) | -7958(1)  | 1602(1)  | 31(1) |
| C(29A) | -3461(1) | -8561(1)  | 1735(1)  | 37(1) |
| C(30A) | -3812(2) | -9374(1)  | 1724(1)  | 40(1) |
| C(31A) | -4701(1) | -7860(1)  | 2004(1)  | 31(1) |
| C(32A) | -6042(1) | -7406(1)  | 2184(1)  | 39(1) |
| C(33A) | -6750(1) | -7917(1)  | 2072(1)  | 37(1) |
| C(34A) | -6622(1) | -8708(2)  | 2093(1)  | 43(1) |
| C(35A) | -7257(2) | -9214(1)  | 2007(1)  | 56(1) |
| C(36A) | -8021(1) | -8929(2)  | 1899(1)  | 66(1) |
| C(37A) | -8150(1) | -8138(2)  | 1877(1)  | 56(1) |
| C(38A) | -7514(2) | -7632(1)  | 1963(2)  | 43(1) |
| C(33B) | -6687(1) | -7962(2)  | 2012(2)  | 37(1) |
| C(34B) | -6528(1) | -8711(2)  | 1864(1)  | 43(1) |
| C(35B) | -7158(1) | -9183(2)  | 1714(2)  | 56(1) |
| C(36B) | -7947(1) | -8905(3)  | 1711(2)  | 66(1) |
| C(37B) | -8106(1) | -8156(3)  | 1859(2)  | 56(1) |
| C(38B) | -7476(2) | -7684(2)  | 2010(2)  | 43(1) |
| O(1W)  | -2746(1) | -9987(1)  | 755(1)   | 56(1) |



**Table S37.** Bond lengths [Å] and angles [°] for gellman124a.

|              |          |              |          |
|--------------|----------|--------------|----------|
| O(1)-C(5)    | 1.344(3) | C(14)-C(15)  | 1.547(3) |
| O(1)-C(4)    | 1.472(2) | C(14)-H(14A) | 1.0000   |
| O(2)-C(5)    | 1.219(2) | C(15)-C(18)  | 1.523(2) |
| O(3)-C(8)    | 1.233(2) | C(15)-C(16)  | 1.531(3) |
| O(4)-C(18)   | 1.223(2) | C(15)-H(15A) | 1.0000   |
| O(5)-C(21)   | 1.239(2) | C(16)-C(17)  | 1.525(3) |
| O(6)-C(31)   | 1.202(2) | C(16)-H(16C) | 0.9900   |
| O(7)-C(31)   | 1.359(3) | C(16)-H(16D) | 0.9900   |
| O(7)-C(32)   | 1.457(3) | C(17)-H(17D) | 0.9800   |
| N(1)-C(5)    | 1.357(3) | C(17)-H(17F) | 0.9800   |
| N(1)-C(6)    | 1.443(3) | C(17)-H(17E) | 0.9800   |
| N(1)-H(1)    | 0.82(2)  | C(19)-C(20)  | 1.525(3) |
| N(2)-C(8)    | 1.335(3) | C(19)-C(21)  | 1.533(3) |
| N(2)-C(9)    | 1.460(2) | C(19)-H(19A) | 1.0000   |
| N(2)-H(2)    | 0.85(2)  | C(20)-H(20D) | 0.9800   |
| N(3)-C(18)   | 1.350(3) | C(20)-H(20F) | 0.9800   |
| N(3)-C(19)   | 1.454(2) | C(20)-H(20E) | 0.9800   |
| N(3)-H(3)    | 0.83(2)  | C(22)-C(23)  | 1.529(3) |
| N(4)-C(21)   | 1.321(2) | C(22)-C(27)  | 1.537(3) |
| N(4)-C(22)   | 1.457(3) | C(22)-H(22A) | 1.0000   |
| N(4)-H(4)    | 0.90(2)  | C(23)-C(24)  | 1.523(3) |
| C(1)-C(4)    | 1.514(3) | C(23)-H(23C) | 0.9900   |
| C(1)-H(1B)   | 0.9800   | C(23)-H(23D) | 0.9900   |
| C(1)-H(1D)   | 0.9800   | C(24)-C(25)  | 1.519(3) |
| C(1)-H(1C)   | 0.9800   | C(24)-H(24C) | 0.9900   |
| C(2)-C(4)    | 1.518(3) | C(24)-H(24D) | 0.9900   |
| C(2)-H(2C)   | 0.9800   | C(25)-C(26)  | 1.522(3) |
| C(2)-H(2D)   | 0.9800   | C(25)-H(25C) | 0.9900   |
| C(2)-H(2B)   | 0.9800   | C(25)-H(25D) | 0.9900   |
| C(3)-C(4)    | 1.514(3) | C(26)-C(27)  | 1.532(3) |
| C(3)-H(3C)   | 0.9800   | C(26)-H(26D) | 0.9900   |
| C(3)-H(3D)   | 0.9800   | C(26)-H(26C) | 0.9900   |
| C(3)-H(3B)   | 0.9800   | C(27)-C(28)  | 1.553(3) |
| C(6)-C(8)    | 1.522(3) | C(27)-H(27A) | 1.0000   |
| C(6)-C(7)    | 1.534(3) | C(28)-C(31)  | 1.508(3) |
| C(6)-H(6)    | 1.0000   | C(28)-C(29)  | 1.534(3) |
| C(7)-H(7B)   | 0.9800   | C(28)-H(28A) | 1.0000   |
| C(7)-H(7C)   | 0.9800   | C(29)-C(30)  | 1.532(3) |
| C(7)-H(7A)   | 0.9800   | C(29)-H(29C) | 0.9900   |
| C(9)-C(10)   | 1.530(3) | C(29)-H(29D) | 0.9900   |
| C(9)-C(14)   | 1.539(3) | C(30)-H(30D) | 0.9800   |
| C(9)-H(9)    | 1.0000   | C(30)-H(30F) | 0.9800   |
| C(10)-C(11)  | 1.522(3) | C(30)-H(30E) | 0.9800   |
| C(10)-H(10C) | 0.9900   | C(32)-C(33)  | 1.495(3) |
| C(10)-H(10D) | 0.9900   | C(32)-H(32F) | 0.9900   |
| C(11)-C(12)  | 1.526(3) | C(32)-H(32E) | 0.9900   |
| C(11)-H(11D) | 0.9900   | C(33)-C(38)  | 1.375(3) |
| C(11)-H(11C) | 0.9900   | C(33)-C(34)  | 1.384(4) |
| C(12)-C(13)  | 1.528(3) | C(34)-C(35)  | 1.375(4) |
| C(12)-H(12D) | 0.9900   | C(34)-H(34B) | 0.9500   |
| C(12)-H(12C) | 0.9900   | C(35)-C(36)  | 1.383(4) |
| C(13)-C(14)  | 1.539(3) | C(35)-H(35B) | 0.9500   |
| C(13)-H(13D) | 0.9900   | C(36)-C(37)  | 1.355(4) |
| C(13)-H(13C) | 0.9900   | C(36)-H(36B) | 0.9500   |

|               |          |               |          |
|---------------|----------|---------------|----------|
| C(37)-C(38)   | 1.371(4) | C(13A)-H(13B) | 0.9900   |
| C(37)-H(37B)  | 0.9500   | C(14A)-C(15A) | 1.552(3) |
| C(38)-H(38B)  | 0.9500   | C(14A)-H(14)  | 1.0000   |
| O(1A)-C(5A)   | 1.343(2) | C(15A)-C(18A) | 1.520(3) |
| O(1A)-C(4A)   | 1.475(2) | C(15A)-C(16A) | 1.538(3) |
| O(2A)-C(5A)   | 1.218(2) | C(15A)-H(15)  | 1.0000   |
| O(3A)-C(8A)   | 1.232(2) | C(16A)-C(17A) | 1.524(3) |
| O(4A)-C(18A)  | 1.229(2) | C(16A)-H(16B) | 0.9900   |
| O(5A)-C(21A)  | 1.235(2) | C(16A)-H(16A) | 0.9900   |
| O(6A)-C(31A)  | 1.202(2) | C(17A)-H(17B) | 0.9800   |
| O(7A)-C(31A)  | 1.353(3) | C(17A)-H(17A) | 0.9800   |
| O(7A)-C(32A)  | 1.457(2) | C(17A)-H(17C) | 0.9800   |
| N(1A)-C(5A)   | 1.355(3) | C(19A)-C(20A) | 1.525(3) |
| N(1A)-C(6A)   | 1.445(3) | C(19A)-C(21A) | 1.532(3) |
| N(1A)-H(1A)   | 0.82(2)  | C(19A)-H(19)  | 1.0000   |
| N(2A)-C(8A)   | 1.338(3) | C(20A)-H(20A) | 0.9800   |
| N(2A)-C(9A)   | 1.460(2) | C(20A)-H(20C) | 0.9800   |
| N(2A)-H(2A)   | 0.83(2)  | C(20A)-H(20B) | 0.9800   |
| N(3A)-C(18A)  | 1.346(3) | C(22A)-C(23A) | 1.532(3) |
| N(3A)-C(19A)  | 1.452(2) | C(22A)-C(27A) | 1.535(3) |
| N(3A)-H(3A)   | 0.84(2)  | C(22A)-H(22)  | 1.0000   |
| N(4A)-C(21A)  | 1.329(2) | C(23A)-C(24A) | 1.525(3) |
| N(4A)-C(22A)  | 1.458(3) | C(23A)-H(23A) | 0.9900   |
| N(4A)-H(4A)   | 0.88(2)  | C(23A)-H(23B) | 0.9900   |
| C(1A)-C(4A)   | 1.517(3) | C(24A)-C(25A) | 1.521(3) |
| C(1A)-H(1AB)  | 0.9800   | C(24A)-H(24B) | 0.9900   |
| C(1A)-H(1AC)  | 0.9800   | C(24A)-H(24A) | 0.9900   |
| C(1A)-H(1AA)  | 0.9800   | C(25A)-C(26A) | 1.519(3) |
| C(2A)-C(4A)   | 1.513(3) | C(25A)-H(25B) | 0.9900   |
| C(2A)-H(2AA)  | 0.9800   | C(25A)-H(25A) | 0.9900   |
| C(2A)-H(2AC)  | 0.9800   | C(26A)-C(27A) | 1.533(3) |
| C(2A)-H(2AB)  | 0.9800   | C(26A)-H(26B) | 0.9900   |
| C(3A)-C(4A)   | 1.512(3) | C(26A)-H(26A) | 0.9900   |
| C(3A)-H(3AA)  | 0.9800   | C(27A)-C(28A) | 1.551(3) |
| C(3A)-H(3AC)  | 0.9800   | C(27A)-H(27)  | 1.0000   |
| C(3A)-H(3AB)  | 0.9800   | C(28A)-C(31A) | 1.515(3) |
| C(6A)-C(8A)   | 1.523(3) | C(28A)-C(29A) | 1.531(3) |
| C(6A)-C(7A)   | 1.530(3) | C(28A)-H(28)  | 1.0000   |
| C(6A)-H(6A)   | 1.0000   | C(29A)-C(30A) | 1.526(3) |
| C(7A)-H(7AC)  | 0.9800   | C(29A)-H(29A) | 0.9900   |
| C(7A)-H(7AB)  | 0.9800   | C(29A)-H(29B) | 0.9900   |
| C(7A)-H(7AA)  | 0.9800   | C(30A)-H(30A) | 0.9800   |
| C(9A)-C(10A)  | 1.526(3) | C(30A)-H(30C) | 0.9800   |
| C(9A)-C(14A)  | 1.542(3) | C(30A)-H(30B) | 0.9800   |
| C(9A)-H(9A)   | 1.0000   | C(32A)-C(33A) | 1.502(3) |
| C(10A)-C(11A) | 1.524(3) | C(32A)-C(33B) | 1.517(4) |
| C(10A)-H(10B) | 0.9900   | C(32A)-H(32A) | 0.9900   |
| C(10A)-H(10A) | 0.9900   | C(32A)-H(32B) | 0.9900   |
| C(11A)-C(12A) | 1.530(3) | C(32A)-H(32C) | 0.9900   |
| C(11A)-H(11A) | 0.9900   | C(32A)-H(32D) | 0.9900   |
| C(11A)-H(11B) | 0.9900   | C(33A)-C(34A) | 1.3900   |
| C(12A)-C(13A) | 1.527(3) | C(33A)-C(38A) | 1.3900   |
| C(12A)-H(12A) | 0.9900   | C(34A)-C(35A) | 1.3900   |
| C(12A)-H(12B) | 0.9900   | C(34A)-H(34)  | 0.9500   |
| C(13A)-C(14A) | 1.535(3) | C(35A)-C(36A) | 1.3900   |
| C(13A)-H(13A) | 0.9900   | C(35A)-H(35)  | 0.9500   |

|                  |            |                     |            |
|------------------|------------|---------------------|------------|
| C(36A)-C(37A)    | 1.3900     | C(35B)-C(36B)       | 1.3900     |
| C(36A)-H(36)     | 0.9500     | C(35B)-H(35A)       | 0.9500     |
| C(37A)-C(38A)    | 1.3900     | C(36B)-C(37B)       | 1.3900     |
| C(37A)-H(37)     | 0.9500     | C(36B)-H(36A)       | 0.9500     |
| C(38A)-H(38)     | 0.9500     | C(37B)-C(38B)       | 1.3900     |
| C(33B)-C(34B)    | 1.3900     | C(37B)-H(37A)       | 0.9500     |
| C(33B)-C(38B)    | 1.3900     | C(38B)-H(38A)       | 0.9500     |
| C(34B)-C(35B)    | 1.3900     | O(1W)-H(1W)         | 0.9584     |
| C(34B)-H(34A)    | 0.9500     | O(1W)-H(2W)         | 0.9584     |
|                  |            |                     |            |
| C(5)-O(1)-C(4)   | 121.74(16) | C(8)-C(6)-H(6)      | 109.0      |
| C(31)-O(7)-C(32) | 117.34(16) | C(7)-C(6)-H(6)      | 109.0      |
| C(5)-N(1)-C(6)   | 119.65(17) | C(6)-C(7)-H(7B)     | 109.5      |
| C(5)-N(1)-H(1)   | 113.3(17)  | C(6)-C(7)-H(7C)     | 109.5      |
| C(6)-N(1)-H(1)   | 118.6(16)  | H(7B)-C(7)-H(7C)    | 109.5      |
| C(8)-N(2)-C(9)   | 123.80(17) | C(6)-C(7)-H(7A)     | 109.5      |
| C(8)-N(2)-H(2)   | 119.7(15)  | H(7B)-C(7)-H(7A)    | 109.5      |
| C(9)-N(2)-H(2)   | 116.4(15)  | H(7C)-C(7)-H(7A)    | 109.5      |
| C(18)-N(3)-C(19) | 120.56(17) | O(3)-C(8)-N(2)      | 123.26(18) |
| C(18)-N(3)-H(3)  | 122.7(16)  | O(3)-C(8)-C(6)      | 121.40(17) |
| C(19)-N(3)-H(3)  | 116.6(16)  | N(2)-C(8)-C(6)      | 115.34(17) |
| C(21)-N(4)-C(22) | 124.64(17) | N(2)-C(9)-C(10)     | 107.91(16) |
| C(21)-N(4)-H(4)  | 118.3(14)  | N(2)-C(9)-C(14)     | 111.35(15) |
| C(22)-N(4)-H(4)  | 117.0(14)  | C(10)-C(9)-C(14)    | 111.66(16) |
| C(4)-C(1)-H(1B)  | 109.5      | N(2)-C(9)-H(9)      | 108.6      |
| C(4)-C(1)-H(1D)  | 109.5      | C(10)-C(9)-H(9)     | 108.6      |
| H(1B)-C(1)-H(1D) | 109.5      | C(14)-C(9)-H(9)     | 108.6      |
| C(4)-C(1)-H(1C)  | 109.5      | C(11)-C(10)-C(9)    | 112.46(17) |
| H(1B)-C(1)-H(1C) | 109.5      | C(11)-C(10)-H(10C)  | 109.1      |
| H(1D)-C(1)-H(1C) | 109.5      | C(9)-C(10)-H(10C)   | 109.1      |
| C(4)-C(2)-H(2C)  | 109.5      | C(11)-C(10)-H(10D)  | 109.1      |
| C(4)-C(2)-H(2D)  | 109.5      | C(9)-C(10)-H(10D)   | 109.1      |
| H(2C)-C(2)-H(2D) | 109.5      | H(10C)-C(10)-H(10D) | 107.8      |
| C(4)-C(2)-H(2B)  | 109.5      | C(10)-C(11)-C(12)   | 110.31(17) |
| H(2C)-C(2)-H(2B) | 109.5      | C(10)-C(11)-H(11D)  | 109.6      |
| H(2D)-C(2)-H(2B) | 109.5      | C(12)-C(11)-H(11D)  | 109.6      |
| C(4)-C(3)-H(3C)  | 109.5      | C(10)-C(11)-H(11C)  | 109.6      |
| C(4)-C(3)-H(3D)  | 109.5      | C(12)-C(11)-H(11C)  | 109.6      |
| H(3C)-C(3)-H(3D) | 109.5      | H(11D)-C(11)-H(11C) | 108.1      |
| C(4)-C(3)-H(3B)  | 109.5      | C(11)-C(12)-C(13)   | 110.59(17) |
| H(3C)-C(3)-H(3B) | 109.5      | C(11)-C(12)-H(12D)  | 109.5      |
| H(3D)-C(3)-H(3B) | 109.5      | C(13)-C(12)-H(12D)  | 109.5      |
| O(1)-C(4)-C(1)   | 110.57(17) | C(11)-C(12)-H(12C)  | 109.5      |
| O(1)-C(4)-C(3)   | 109.72(18) | C(13)-C(12)-H(12C)  | 109.5      |
| C(1)-C(4)-C(3)   | 112.4(2)   | H(12D)-C(12)-H(12C) | 108.1      |
| O(1)-C(4)-C(2)   | 102.10(17) | C(12)-C(13)-C(14)   | 112.22(17) |
| C(1)-C(4)-C(2)   | 110.2(2)   | C(12)-C(13)-H(13D)  | 109.2      |
| C(3)-C(4)-C(2)   | 111.4(2)   | C(14)-C(13)-H(13D)  | 109.2      |
| O(2)-C(5)-O(1)   | 126.35(18) | C(12)-C(13)-H(13C)  | 109.2      |
| O(2)-C(5)-N(1)   | 124.1(2)   | C(14)-C(13)-H(13C)  | 109.2      |
| O(1)-C(5)-N(1)   | 109.52(17) | H(13D)-C(13)-H(13C) | 107.9      |
| N(1)-C(6)-C(8)   | 110.60(16) | C(9)-C(14)-C(13)    | 109.05(15) |
| N(1)-C(6)-C(7)   | 109.25(16) | C(9)-C(14)-C(15)    | 110.80(15) |
| C(8)-C(6)-C(7)   | 109.86(16) | C(13)-C(14)-C(15)   | 113.87(16) |
| N(1)-C(6)-H(6)   | 109.0      | C(9)-C(14)-H(14A)   | 107.6      |

|                     |            |                     |            |
|---------------------|------------|---------------------|------------|
| C(13)-C(14)-H(14A)  | 107.6      | C(24)-C(25)-C(26)   | 110.97(18) |
| C(15)-C(14)-H(14A)  | 107.6      | C(24)-C(25)-H(25C)  | 109.4      |
| C(18)-C(15)-C(16)   | 108.80(15) | C(26)-C(25)-H(25C)  | 109.4      |
| C(18)-C(15)-C(14)   | 111.72(16) | C(24)-C(25)-H(25D)  | 109.4      |
| C(16)-C(15)-C(14)   | 114.52(16) | C(26)-C(25)-H(25D)  | 109.4      |
| C(18)-C(15)-H(15A)  | 107.1      | H(25C)-C(25)-H(25D) | 108.0      |
| C(16)-C(15)-H(15A)  | 107.1      | C(25)-C(26)-C(27)   | 111.47(18) |
| C(14)-C(15)-H(15A)  | 107.1      | C(25)-C(26)-H(26D)  | 109.3      |
| C(17)-C(16)-C(15)   | 112.08(18) | C(27)-C(26)-H(26D)  | 109.3      |
| C(17)-C(16)-H(16C)  | 109.2      | C(25)-C(26)-H(26C)  | 109.3      |
| C(15)-C(16)-H(16C)  | 109.2      | C(27)-C(26)-H(26C)  | 109.3      |
| C(17)-C(16)-H(16D)  | 109.2      | H(26D)-C(26)-H(26C) | 108.0      |
| C(15)-C(16)-H(16D)  | 109.2      | C(26)-C(27)-C(22)   | 109.66(17) |
| H(16C)-C(16)-H(16D) | 107.9      | C(26)-C(27)-C(28)   | 112.42(17) |
| C(16)-C(17)-H(17D)  | 109.5      | C(22)-C(27)-C(28)   | 112.60(16) |
| C(16)-C(17)-H(17F)  | 109.5      | C(26)-C(27)-H(27A)  | 107.3      |
| H(17D)-C(17)-H(17F) | 109.5      | C(22)-C(27)-H(27A)  | 107.3      |
| C(16)-C(17)-H(17E)  | 109.5      | C(28)-C(27)-H(27A)  | 107.3      |
| H(17D)-C(17)-H(17E) | 109.5      | C(31)-C(28)-C(29)   | 110.83(17) |
| H(17F)-C(17)-H(17E) | 109.5      | C(31)-C(28)-C(27)   | 109.25(15) |
| O(4)-C(18)-N(3)     | 122.32(17) | C(29)-C(28)-C(27)   | 114.70(17) |
| O(4)-C(18)-C(15)    | 122.77(18) | C(31)-C(28)-H(28A)  | 107.2      |
| N(3)-C(18)-C(15)    | 114.87(17) | C(29)-C(28)-H(28A)  | 107.2      |
| N(3)-C(19)-C(20)    | 109.93(16) | C(27)-C(28)-H(28A)  | 107.2      |
| N(3)-C(19)-C(21)    | 110.78(15) | C(30)-C(29)-C(28)   | 112.03(18) |
| C(20)-C(19)-C(21)   | 109.84(16) | C(30)-C(29)-H(29C)  | 109.2      |
| N(3)-C(19)-H(19A)   | 108.7      | C(28)-C(29)-H(29C)  | 109.2      |
| C(20)-C(19)-H(19A)  | 108.7      | C(30)-C(29)-H(29D)  | 109.2      |
| C(21)-C(19)-H(19A)  | 108.7      | C(28)-C(29)-H(29D)  | 109.2      |
| C(19)-C(20)-H(20D)  | 109.5      | H(29C)-C(29)-H(29D) | 107.9      |
| C(19)-C(20)-H(20F)  | 109.5      | C(29)-C(30)-H(30D)  | 109.5      |
| H(20D)-C(20)-H(20F) | 109.5      | C(29)-C(30)-H(30F)  | 109.5      |
| C(19)-C(20)-H(20E)  | 109.5      | H(30D)-C(30)-H(30F) | 109.5      |
| H(20D)-C(20)-H(20E) | 109.5      | C(29)-C(30)-H(30E)  | 109.5      |
| H(20F)-C(20)-H(20E) | 109.5      | H(30D)-C(30)-H(30E) | 109.5      |
| O(5)-C(21)-N(4)     | 124.77(18) | H(30F)-C(30)-H(30E) | 109.5      |
| O(5)-C(21)-C(19)    | 121.00(17) | O(6)-C(31)-O(7)     | 122.5(2)   |
| N(4)-C(21)-C(19)    | 114.17(17) | O(6)-C(31)-C(28)    | 126.6(2)   |
| N(4)-C(22)-C(23)    | 109.81(17) | O(7)-C(31)-C(28)    | 110.88(17) |
| N(4)-C(22)-C(27)    | 110.51(16) | O(7)-C(32)-C(33)    | 109.72(18) |
| C(23)-C(22)-C(27)   | 110.18(16) | O(7)-C(32)-H(32F)   | 109.7      |
| N(4)-C(22)-H(22A)   | 108.8      | C(33)-C(32)-H(32F)  | 109.7      |
| C(23)-C(22)-H(22A)  | 108.8      | O(7)-C(32)-H(32E)   | 109.7      |
| C(27)-C(22)-H(22A)  | 108.8      | C(33)-C(32)-H(32E)  | 109.7      |
| C(24)-C(23)-C(22)   | 111.74(17) | H(32F)-C(32)-H(32E) | 108.2      |
| C(24)-C(23)-H(23C)  | 109.3      | C(38)-C(33)-C(34)   | 118.3(2)   |
| C(22)-C(23)-H(23C)  | 109.3      | C(38)-C(33)-C(32)   | 120.9(2)   |
| C(24)-C(23)-H(23D)  | 109.3      | C(34)-C(33)-C(32)   | 120.8(2)   |
| C(22)-C(23)-H(23D)  | 109.3      | C(35)-C(34)-C(33)   | 120.3(3)   |
| H(23C)-C(23)-H(23D) | 107.9      | C(35)-C(34)-H(34B)  | 119.8      |
| C(25)-C(24)-C(23)   | 111.31(18) | C(33)-C(34)-H(34B)  | 119.8      |
| C(25)-C(24)-H(24C)  | 109.4      | C(34)-C(35)-C(36)   | 120.1(3)   |
| C(23)-C(24)-H(24C)  | 109.4      | C(34)-C(35)-H(35B)  | 120.0      |
| C(25)-C(24)-H(24D)  | 109.4      | C(36)-C(35)-H(35B)  | 120.0      |
| C(23)-C(24)-H(24D)  | 109.4      | C(37)-C(36)-C(35)   | 119.7(3)   |
| H(24C)-C(24)-H(24D) | 108.0      | C(37)-C(36)-H(36B)  | 120.2      |

|                     |            |                      |            |
|---------------------|------------|----------------------|------------|
| C(35)-C(36)-H(36B)  | 120.2      | H(7AC)-C(7A)-H(7AB)  | 109.5      |
| C(36)-C(37)-C(38)   | 120.2(3)   | C(6A)-C(7A)-H(7AA)   | 109.5      |
| C(36)-C(37)-H(37B)  | 119.9      | H(7AC)-C(7A)-H(7AA)  | 109.5      |
| C(38)-C(37)-H(37B)  | 119.9      | H(7AB)-C(7A)-H(7AA)  | 109.5      |
| C(37)-C(38)-C(33)   | 121.3(3)   | O(3A)-C(8A)-N(2A)    | 123.08(18) |
| C(37)-C(38)-H(38B)  | 119.3      | O(3A)-C(8A)-C(6A)    | 121.61(18) |
| C(33)-C(38)-H(38B)  | 119.3      | N(2A)-C(8A)-C(6A)    | 115.29(17) |
| C(5A)-O(1A)-C(4A)   | 120.96(16) | N(2A)-C(9A)-C(10A)   | 108.90(16) |
| C(31A)-O(7A)-C(32A) | 117.87(16) | N(2A)-C(9A)-C(14A)   | 111.10(15) |
| C(5A)-N(1A)-C(6A)   | 120.37(17) | C(10A)-C(9A)-C(14A)  | 111.91(16) |
| C(5A)-N(1A)-H(1A)   | 115.1(17)  | N(2A)-C(9A)-H(9A)    | 108.3      |
| C(6A)-N(1A)-H(1A)   | 120.5(16)  | C(10A)-C(9A)-H(9A)   | 108.3      |
| C(8A)-N(2A)-C(9A)   | 123.69(17) | C(14A)-C(9A)-H(9A)   | 108.3      |
| C(8A)-N(2A)-H(2A)   | 119.8(15)  | C(11A)-C(10A)-C(9A)  | 112.02(18) |
| C(9A)-N(2A)-H(2A)   | 115.8(15)  | C(11A)-C(10A)-H(10B) | 109.2      |
| C(18A)-N(3A)-C(19A) | 120.52(17) | C(9A)-C(10A)-H(10B)  | 109.2      |
| C(18A)-N(3A)-H(3A)  | 121.8(15)  | C(11A)-C(10A)-H(10A) | 109.2      |
| C(19A)-N(3A)-H(3A)  | 117.7(15)  | C(9A)-C(10A)-H(10A)  | 109.2      |
| C(21A)-N(4A)-C(22A) | 124.22(17) | H(10B)-C(10A)-H(10A) | 107.9      |
| C(21A)-N(4A)-H(4A)  | 116.4(14)  | C(10A)-C(11A)-C(12A) | 109.85(18) |
| C(22A)-N(4A)-H(4A)  | 119.4(14)  | C(10A)-C(11A)-H(11A) | 109.7      |
| C(4A)-C(1A)-H(1AB)  | 109.5      | C(12A)-C(11A)-H(11A) | 109.7      |
| C(4A)-C(1A)-H(1AC)  | 109.5      | C(10A)-C(11A)-H(11B) | 109.7      |
| H(1AB)-C(1A)-H(1AC) | 109.5      | C(12A)-C(11A)-H(11B) | 109.7      |
| C(4A)-C(1A)-H(1AA)  | 109.5      | H(11A)-C(11A)-H(11B) | 108.2      |
| H(1AB)-C(1A)-H(1AA) | 109.5      | C(13A)-C(12A)-C(11A) | 110.19(18) |
| H(1AC)-C(1A)-H(1AA) | 109.5      | C(13A)-C(12A)-H(12A) | 109.6      |
| C(4A)-C(2A)-H(2AA)  | 109.5      | C(11A)-C(12A)-H(12A) | 109.6      |
| C(4A)-C(2A)-H(2AC)  | 109.5      | C(13A)-C(12A)-H(12B) | 109.6      |
| H(2AA)-C(2A)-H(2AC) | 109.5      | C(11A)-C(12A)-H(12B) | 109.6      |
| C(4A)-C(2A)-H(2AB)  | 109.5      | H(12A)-C(12A)-H(12B) | 108.1      |
| H(2AA)-C(2A)-H(2AB) | 109.5      | C(12A)-C(13A)-C(14A) | 112.08(18) |
| H(2AC)-C(2A)-H(2AB) | 109.5      | C(12A)-C(13A)-H(13A) | 109.2      |
| C(4A)-C(3A)-H(3AA)  | 109.5      | C(14A)-C(13A)-H(13A) | 109.2      |
| C(4A)-C(3A)-H(3AC)  | 109.5      | C(12A)-C(13A)-H(13B) | 109.2      |
| H(3AA)-C(3A)-H(3AC) | 109.5      | C(14A)-C(13A)-H(13B) | 109.2      |
| C(4A)-C(3A)-H(3AB)  | 109.5      | H(13A)-C(13A)-H(13B) | 107.9      |
| H(3AA)-C(3A)-H(3AB) | 109.5      | C(13A)-C(14A)-C(9A)  | 109.63(16) |
| H(3AC)-C(3A)-H(3AB) | 109.5      | C(13A)-C(14A)-C(15A) | 113.84(16) |
| O(1A)-C(4A)-C(3A)   | 110.09(19) | C(9A)-C(14A)-C(15A)  | 110.54(15) |
| O(1A)-C(4A)-C(2A)   | 102.29(17) | C(13A)-C(14A)-H(14)  | 107.5      |
| C(3A)-C(4A)-C(2A)   | 111.0(2)   | C(9A)-C(14A)-H(14)   | 107.5      |
| O(1A)-C(4A)-C(1A)   | 109.66(18) | C(15A)-C(14A)-H(14)  | 107.5      |
| C(3A)-C(4A)-C(1A)   | 113.00(19) | C(18A)-C(15A)-C(16A) | 108.19(15) |
| C(2A)-C(4A)-C(1A)   | 110.3(2)   | C(18A)-C(15A)-C(14A) | 111.75(16) |
| O(2A)-C(5A)-O(1A)   | 126.32(18) | C(16A)-C(15A)-C(14A) | 114.77(16) |
| O(2A)-C(5A)-N(1A)   | 123.9(2)   | C(18A)-C(15A)-H(15)  | 107.3      |
| O(1A)-C(5A)-N(1A)   | 109.79(17) | C(16A)-C(15A)-H(15)  | 107.3      |
| N(1A)-C(6A)-C(8A)   | 110.75(17) | C(14A)-C(15A)-H(15)  | 107.3      |
| N(1A)-C(6A)-C(7A)   | 109.50(16) | C(17A)-C(16A)-C(15A) | 112.21(18) |
| C(8A)-C(6A)-C(7A)   | 109.65(16) | C(17A)-C(16A)-H(16B) | 109.2      |
| N(1A)-C(6A)-H(6A)   | 109.0      | C(15A)-C(16A)-H(16B) | 109.2      |
| C(8A)-C(6A)-H(6A)   | 109.0      | C(17A)-C(16A)-H(16A) | 109.2      |
| C(7A)-C(6A)-H(6A)   | 109.0      | C(15A)-C(16A)-H(16A) | 109.2      |
| C(6A)-C(7A)-H(7AC)  | 109.5      | H(16B)-C(16A)-H(16A) | 107.9      |
| C(6A)-C(7A)-H(7AB)  | 109.5      | C(16A)-C(17A)-H(17B) | 109.5      |

|                      |            |                      |            |
|----------------------|------------|----------------------|------------|
| C(16A)-C(17A)-H(17A) | 109.5      | C(26A)-C(27A)-H(27)  | 107.6      |
| H(17B)-C(17A)-H(17A) | 109.5      | C(22A)-C(27A)-H(27)  | 107.6      |
| C(16A)-C(17A)-H(17C) | 109.5      | C(28A)-C(27A)-H(27)  | 107.6      |
| H(17B)-C(17A)-H(17C) | 109.5      | C(31A)-C(28A)-C(29A) | 110.31(17) |
| H(17A)-C(17A)-H(17C) | 109.5      | C(31A)-C(28A)-C(27A) | 109.41(16) |
| O(4A)-C(18A)-N(3A)   | 121.73(17) | C(29A)-C(28A)-C(27A) | 114.83(17) |
| O(4A)-C(18A)-C(15A)  | 122.78(18) | C(31A)-C(28A)-H(28)  | 107.3      |
| N(3A)-C(18A)-C(15A)  | 115.42(17) | C(29A)-C(28A)-H(28)  | 107.3      |
| N(3A)-C(19A)-C(20A)  | 110.24(16) | C(27A)-C(28A)-H(28)  | 107.3      |
| N(3A)-C(19A)-C(21A)  | 110.85(15) | C(30A)-C(29A)-C(28A) | 111.41(18) |
| C(20A)-C(19A)-C(21A) | 110.02(16) | C(30A)-C(29A)-H(29A) | 109.3      |
| N(3A)-C(19A)-H(19)   | 108.6      | C(28A)-C(29A)-H(29A) | 109.3      |
| C(20A)-C(19A)-H(19)  | 108.6      | C(30A)-C(29A)-H(29B) | 109.3      |
| C(21A)-C(19A)-H(19)  | 108.6      | C(28A)-C(29A)-H(29B) | 109.3      |
| C(19A)-C(20A)-H(20A) | 109.5      | H(29A)-C(29A)-H(29B) | 108.0      |
| C(19A)-C(20A)-H(20C) | 109.5      | C(29A)-C(30A)-H(30A) | 109.5      |
| H(20A)-C(20A)-H(20C) | 109.5      | C(29A)-C(30A)-H(30C) | 109.5      |
| C(19A)-C(20A)-H(20B) | 109.5      | H(30A)-C(30A)-H(30C) | 109.5      |
| H(20A)-C(20A)-H(20B) | 109.5      | C(29A)-C(30A)-H(30B) | 109.5      |
| H(20C)-C(20A)-H(20B) | 109.5      | H(30A)-C(30A)-H(30B) | 109.5      |
| O(5A)-C(21A)-N(4A)   | 124.52(18) | H(30C)-C(30A)-H(30B) | 109.5      |
| O(5A)-C(21A)-C(19A)  | 120.93(17) | O(6A)-C(31A)-O(7A)   | 122.7(2)   |
| N(4A)-C(21A)-C(19A)  | 114.51(16) | O(6A)-C(31A)-C(28A)  | 126.54(19) |
| N(4A)-C(22A)-C(23A)  | 109.79(16) | O(7A)-C(31A)-C(28A)  | 110.76(17) |
| N(4A)-C(22A)-C(27A)  | 110.60(16) | O(7A)-C(32A)-C(33A)  | 112.17(19) |
| C(23A)-C(22A)-C(27A) | 110.95(16) | O(7A)-C(32A)-C(33B)  | 104.14(19) |
| N(4A)-C(22A)-H(22)   | 108.5      | C(33A)-C(32A)-C(33B) | 8.03(19)   |
| C(23A)-C(22A)-H(22)  | 108.5      | O(7A)-C(32A)-H(32A)  | 109.2      |
| C(27A)-C(22A)-H(22)  | 108.5      | C(33A)-C(32A)-H(32A) | 109.2      |
| C(24A)-C(23A)-C(22A) | 111.22(18) | C(33B)-C(32A)-H(32A) | 113.1      |
| C(24A)-C(23A)-H(23A) | 109.4      | O(7A)-C(32A)-H(32B)  | 109.2      |
| C(22A)-C(23A)-H(23A) | 109.4      | C(33A)-C(32A)-H(32B) | 109.2      |
| C(24A)-C(23A)-H(23B) | 109.4      | C(33B)-C(32A)-H(32B) | 113.2      |
| C(22A)-C(23A)-H(23B) | 109.4      | H(32A)-C(32A)-H(32B) | 107.9      |
| H(23A)-C(23A)-H(23B) | 108.0      | O(7A)-C(32A)-H(32C)  | 110.9      |
| C(25A)-C(24A)-C(23A) | 110.54(18) | C(33A)-C(32A)-H(32C) | 106.9      |
| C(25A)-C(24A)-H(24B) | 109.5      | C(33B)-C(32A)-H(32C) | 110.9      |
| C(23A)-C(24A)-H(24B) | 109.5      | H(32A)-C(32A)-H(32C) | 2.4        |
| C(25A)-C(24A)-H(24A) | 109.5      | H(32B)-C(32A)-H(32C) | 108.4      |
| C(23A)-C(24A)-H(24A) | 109.5      | O(7A)-C(32A)-H(32D)  | 110.9      |
| H(24B)-C(24A)-H(24A) | 108.1      | C(33A)-C(32A)-H(32D) | 106.8      |
| C(26A)-C(25A)-C(24A) | 110.82(17) | C(33B)-C(32A)-H(32D) | 110.9      |
| C(26A)-C(25A)-H(25B) | 109.5      | H(32A)-C(32A)-H(32D) | 108.5      |
| C(24A)-C(25A)-H(25B) | 109.5      | H(32B)-C(32A)-H(32D) | 2.4        |
| C(26A)-C(25A)-H(25A) | 109.5      | H(32C)-C(32A)-H(32D) | 108.9      |
| C(24A)-C(25A)-H(25A) | 109.5      | C(34A)-C(33A)-C(38A) | 120.0      |
| H(25B)-C(25A)-H(25A) | 108.1      | C(34A)-C(33A)-C(32A) | 117.1(2)   |
| C(25A)-C(26A)-C(27A) | 112.18(18) | C(38A)-C(33A)-C(32A) | 122.9(2)   |
| C(25A)-C(26A)-H(26B) | 109.2      | C(35A)-C(34A)-C(33A) | 120.0      |
| C(27A)-C(26A)-H(26B) | 109.2      | C(35A)-C(34A)-H(34)  | 120.0      |
| C(25A)-C(26A)-H(26A) | 109.2      | C(33A)-C(34A)-H(34)  | 120.0      |
| C(27A)-C(26A)-H(26A) | 109.2      | C(36A)-C(35A)-C(34A) | 120.0      |
| H(26B)-C(26A)-H(26A) | 107.9      | C(36A)-C(35A)-H(35)  | 120.0      |
| C(26A)-C(27A)-C(22A) | 110.16(17) | C(34A)-C(35A)-H(35)  | 120.0      |
| C(26A)-C(27A)-C(28A) | 112.42(17) | C(37A)-C(36A)-C(35A) | 120.0      |
| C(22A)-C(27A)-C(28A) | 111.36(15) | C(37A)-C(36A)-H(36)  | 120.0      |

|                      |            |                      |       |
|----------------------|------------|----------------------|-------|
| C(35A)-C(36A)-H(36)  | 120.0      | C(36B)-C(35B)-C(34B) | 120.0 |
| C(36A)-C(37A)-C(38A) | 120.0      | C(36B)-C(35B)-H(35A) | 120.0 |
| C(36A)-C(37A)-H(37)  | 120.0      | C(34B)-C(35B)-H(35A) | 120.0 |
| C(38A)-C(37A)-H(37)  | 120.0      | C(37B)-C(36B)-C(35B) | 120.0 |
| C(37A)-C(38A)-C(33A) | 120.0      | C(37B)-C(36B)-H(36A) | 120.0 |
| C(37A)-C(38A)-H(38)  | 120.0      | C(35B)-C(36B)-H(36A) | 120.0 |
| C(33A)-C(38A)-H(38)  | 120.0      | C(36B)-C(37B)-C(38B) | 120.0 |
| C(34B)-C(33B)-C(38B) | 120.0      | C(36B)-C(37B)-H(37A) | 120.0 |
| C(34B)-C(33B)-C(32A) | 123.89(19) | C(38B)-C(37B)-H(37A) | 120.0 |
| C(38B)-C(33B)-C(32A) | 116.11(19) | C(37B)-C(38B)-C(33B) | 120.0 |
| C(33B)-C(34B)-C(35B) | 120.0      | C(37B)-C(38B)-H(38A) | 120.0 |
| C(33B)-C(34B)-H(34A) | 120.0      | C(33B)-C(38B)-H(38A) | 120.0 |
| C(35B)-C(34B)-H(34A) | 120.0      | H(1W)-O(1W)-H(2W)    | 104.5 |

---

Symmetry transformations used to generate equivalent atoms:

**Table S38.** Anisotropic displacement parameters ( $\text{\AA}^2 \times 10^3$ ) for gellman124a. The anisotropic displacement factor exponent takes the form:  $-2\pi^2 [ h^2 a^{*2} U^{11} + \dots + 2 h k a^* b^* U^{12} ]$

|       | U <sup>11</sup> | U <sup>22</sup> | U <sup>33</sup> | U <sup>23</sup> | U <sup>13</sup> | U <sup>12</sup> |
|-------|-----------------|-----------------|-----------------|-----------------|-----------------|-----------------|
| O(1)  | 56(1)           | 26(1)           | 32(1)           | -3(1)           | 4(1)            | 0(1)            |
| O(2)  | 46(1)           | 24(1)           | 38(1)           | 2(1)            | 2(1)            | -3(1)           |
| O(3)  | 25(1)           | 27(1)           | 40(1)           | 1(1)            | 4(1)            | -2(1)           |
| O(4)  | 36(1)           | 23(1)           | 38(1)           | 3(1)            | -2(1)           | -1(1)           |
| O(5)  | 30(1)           | 28(1)           | 43(1)           | 1(1)            | 3(1)            | 4(1)            |
| O(6)  | 58(1)           | 41(1)           | 35(1)           | -8(1)           | 3(1)            | 2(1)            |
| O(7)  | 38(1)           | 38(1)           | 32(1)           | -2(1)           | -2(1)           | 1(1)            |
| N(1)  | 43(1)           | 23(1)           | 30(1)           | 2(1)            | 1(1)            | -4(1)           |
| N(2)  | 24(1)           | 26(1)           | 33(1)           | -2(1)           | -1(1)           | 2(1)            |
| N(3)  | 30(1)           | 21(1)           | 32(1)           | 1(1)            | 0(1)            | 0(1)            |
| N(4)  | 24(1)           | 23(1)           | 38(1)           | 1(1)            | 3(1)            | 1(1)            |
| C(1)  | 48(2)           | 40(1)           | 52(2)           | 3(1)            | 3(1)            | 7(1)            |
| C(2)  | 62(2)           | 43(1)           | 38(1)           | -8(1)           | 2(1)            | 4(1)            |
| C(3)  | 53(2)           | 43(1)           | 54(2)           | -13(1)          | -4(1)           | -2(1)           |
| C(4)  | 45(1)           | 29(1)           | 39(1)           | -7(1)           | -2(1)           | 3(1)            |
| C(5)  | 38(1)           | 28(1)           | 31(1)           | -2(1)           | -4(1)           | -3(1)           |
| C(6)  | 32(1)           | 24(1)           | 31(1)           | 1(1)            | -1(1)           | 0(1)            |
| C(7)  | 42(1)           | 27(1)           | 40(1)           | 0(1)            | -3(1)           | 4(1)            |
| C(8)  | 30(1)           | 16(1)           | 33(1)           | -2(1)           | 0(1)            | -1(1)           |
| C(9)  | 28(1)           | 23(1)           | 31(1)           | -2(1)           | -2(1)           | 1(1)            |
| C(10) | 43(1)           | 27(1)           | 36(1)           | -4(1)           | -2(1)           | 6(1)            |
| C(11) | 53(1)           | 33(1)           | 33(1)           | -5(1)           | -3(1)           | 2(1)            |
| C(12) | 49(1)           | 33(1)           | 31(1)           | 1(1)            | -8(1)           | 0(1)            |
| C(13) | 40(1)           | 27(1)           | 36(1)           | 2(1)            | -3(1)           | 2(1)            |
| C(14) | 26(1)           | 23(1)           | 30(1)           | 0(1)            | 0(1)            | -1(1)           |
| C(15) | 29(1)           | 21(1)           | 34(1)           | 1(1)            | 0(1)            | -2(1)           |
| C(16) | 33(1)           | 26(1)           | 47(1)           | -3(1)           | 5(1)            | -5(1)           |
| C(17) | 34(1)           | 37(1)           | 58(2)           | -3(1)           | 14(1)           | 0(1)            |
| C(18) | 25(1)           | 24(1)           | 32(1)           | -1(1)           | 6(1)            | 0(1)            |
| C(19) | 27(1)           | 23(1)           | 37(1)           | -2(1)           | 3(1)            | 0(1)            |
| C(20) | 42(1)           | 32(1)           | 39(1)           | -5(1)           | 4(1)            | -7(1)           |
| C(21) | 24(1)           | 21(1)           | 33(1)           | -4(1)           | -3(1)           | -2(1)           |
| C(22) | 27(1)           | 25(1)           | 40(1)           | 0(1)            | 2(1)            | -1(1)           |
| C(23) | 34(1)           | 27(1)           | 44(1)           | -2(1)           | -4(1)           | -6(1)           |
| C(24) | 39(1)           | 24(1)           | 54(1)           | 3(1)            | -2(1)           | -10(1)          |
| C(25) | 50(1)           | 27(1)           | 43(1)           | 2(1)            | 4(1)            | -10(1)          |
| C(26) | 47(1)           | 26(1)           | 42(1)           | 0(1)            | 5(1)            | -6(1)           |
| C(27) | 32(1)           | 22(1)           | 38(1)           | -1(1)           | 3(1)            | -2(1)           |
| C(28) | 35(1)           | 22(1)           | 36(1)           | 0(1)            | 3(1)            | -3(1)           |
| C(29) | 42(1)           | 28(1)           | 53(1)           | -7(1)           | 2(1)            | 0(1)            |
| C(30) | 46(1)           | 26(1)           | 60(2)           | -6(1)           | 2(1)            | 2(1)            |
| C(31) | 38(1)           | 21(1)           | 35(1)           | -1(1)           | 5(1)            | -8(1)           |
| C(32) | 46(1)           | 44(1)           | 34(1)           | 1(1)            | -8(1)           | 0(1)            |
| C(33) | 44(1)           | 40(1)           | 39(1)           | -12(1)          | -3(1)           | 0(1)            |
| C(34) | 46(2)           | 37(1)           | 102(2)          | -14(1)          | 12(2)           | -3(1)           |
| C(35) | 57(2)           | 46(2)           | 126(3)          | -13(2)          | 13(2)           | -16(1)          |
| C(36) | 47(2)           | 78(2)           | 77(2)           | -22(2)          | 5(1)            | -19(2)          |
| C(37) | 37(2)           | 89(2)           | 59(2)           | -6(2)           | -7(1)           | 5(1)            |
| C(38) | 48(2)           | 58(2)           | 51(2)           | 0(1)            | -10(1)          | 8(1)            |
| O(1A) | 63(1)           | 24(1)           | 29(1)           | 2(1)            | -1(1)           | 0(1)            |
| O(2A) | 47(1)           | 23(1)           | 36(1)           | -3(1)           | -1(1)           | -1(1)           |



|        |       |       |       |       |        |        |
|--------|-------|-------|-------|-------|--------|--------|
| O(3A)  | 30(1) | 26(1) | 39(1) | -1(1) | -4(1)  | -2(1)  |
| O(4A)  | 36(1) | 25(1) | 40(1) | -5(1) | 4(1)   | -1(1)  |
| O(5A)  | 26(1) | 29(1) | 47(1) | -5(1) | -3(1)  | 3(1)   |
| O(6A)  | 54(1) | 49(1) | 31(1) | 1(1)  | -2(1)  | 12(1)  |
| O(7A)  | 34(1) | 37(1) | 33(1) | 3(1)  | 3(1)   | 2(1)   |
| N(1A)  | 44(1) | 23(1) | 30(1) | -1(1) | -1(1)  | -2(1)  |
| N(2A)  | 25(1) | 25(1) | 34(1) | 1(1)  | 0(1)   | 1(1)   |
| N(3A)  | 29(1) | 21(1) | 34(1) | -3(1) | 1(1)   | 0(1)   |
| N(4A)  | 25(1) | 22(1) | 36(1) | 0(1)  | -2(1)  | 2(1)   |
| C(1A)  | 49(2) | 37(1) | 52(2) | 0(1)  | -2(1)  | 4(1)   |
| C(2A)  | 84(2) | 39(1) | 44(1) | 8(1)  | -7(1)  | 5(1)   |
| C(3A)  | 57(2) | 40(1) | 50(2) | 12(1) | 9(1)   | -5(1)  |
| C(4A)  | 52(1) | 25(1) | 37(1) | 6(1)  | 0(1)   | 2(1)   |
| C(5A)  | 35(1) | 25(1) | 34(1) | -1(1) | 6(1)   | -3(1)  |
| C(6A)  | 31(1) | 25(1) | 33(1) | -1(1) | 2(1)   | -1(1)  |
| C(7A)  | 43(1) | 28(1) | 41(1) | 0(1)  | 4(1)   | 6(1)   |
| C(8A)  | 30(1) | 14(1) | 36(1) | 3(1)  | 0(1)   | -1(1)  |
| C(9A)  | 29(1) | 25(1) | 33(1) | 1(1)  | 1(1)   | 0(1)   |
| C(10A) | 36(1) | 34(1) | 38(1) | 7(1)  | -3(1)  | 0(1)   |
| C(11A) | 47(1) | 36(1) | 33(1) | 8(1)  | -1(1)  | -3(1)  |
| C(12A) | 42(1) | 44(1) | 31(1) | 0(1)  | 2(1)   | -7(1)  |
| C(13A) | 37(1) | 34(1) | 34(1) | -5(1) | 4(1)   | -4(1)  |
| C(14A) | 27(1) | 23(1) | 33(1) | -1(1) | -1(1)  | -3(1)  |
| C(15A) | 28(1) | 24(1) | 31(1) | -2(1) | 0(1)   | 0(1)   |
| C(16A) | 28(1) | 24(1) | 49(1) | 0(1)  | -4(1)  | -3(1)  |
| C(17A) | 33(1) | 32(1) | 56(1) | 2(1)  | -11(1) | -2(1)  |
| C(18A) | 23(1) | 26(1) | 33(1) | -3(1) | -4(1)  | 3(1)   |
| C(19A) | 28(1) | 22(1) | 36(1) | 0(1)  | 0(1)   | 1(1)   |
| C(20A) | 37(1) | 29(1) | 39(1) | 2(1)  | -2(1)  | -5(1)  |
| C(21A) | 25(1) | 19(1) | 35(1) | 2(1)  | 1(1)   | -1(1)  |
| C(22A) | 28(1) | 23(1) | 40(1) | -2(1) | -2(1)  | -1(1)  |
| C(23A) | 35(1) | 25(1) | 45(1) | 0(1)  | 6(1)   | -4(1)  |
| C(24A) | 34(1) | 24(1) | 58(2) | -5(1) | 1(1)   | -8(1)  |
| C(25A) | 43(1) | 28(1) | 48(1) | -5(1) | -6(1)  | -4(1)  |
| C(26A) | 43(1) | 31(1) | 39(1) | -4(1) | -4(1)  | -2(1)  |
| C(27A) | 32(1) | 24(1) | 37(1) | -1(1) | -2(1)  | 0(1)   |
| C(28A) | 33(1) | 24(1) | 34(1) | 0(1)  | 0(1)   | 0(1)   |
| C(29A) | 36(1) | 28(1) | 47(1) | 3(1)  | 1(1)   | 3(1)   |
| C(30A) | 47(1) | 28(1) | 47(1) | 4(1)  | 4(1)   | 2(1)   |
| C(31A) | 38(1) | 21(1) | 36(1) | -3(1) | -3(1)  | 1(1)   |
| C(32A) | 40(1) | 41(1) | 36(1) | 2(1)  | 7(1)   | 6(1)   |
| C(33A) | 32(1) | 43(1) | 37(2) | 6(1)  | 8(1)   | 8(1)   |
| C(34A) | 38(1) | 48(1) | 43(1) | 4(1)  | 2(1)   | 7(1)   |
| C(35A) | 36(1) | 70(1) | 63(2) | 2(1)  | -2(1)  | 1(1)   |
| C(36A) | 44(2) | 76(2) | 77(4) | -5(3) | -4(2)  | -16(2) |
| C(37A) | 36(1) | 70(1) | 63(2) | 2(1)  | -2(1)  | 1(1)   |
| C(38A) | 38(1) | 48(1) | 43(1) | 4(1)  | 2(1)   | 7(1)   |
| C(33B) | 32(1) | 43(1) | 37(2) | 6(1)  | 8(1)   | 8(1)   |
| C(34B) | 38(1) | 48(1) | 43(1) | 4(1)  | 2(1)   | 7(1)   |
| C(35B) | 36(1) | 70(1) | 63(2) | 2(1)  | -2(1)  | 1(1)   |
| C(36B) | 44(2) | 76(2) | 77(4) | -5(3) | -4(2)  | -16(2) |
| C(37B) | 36(1) | 70(1) | 63(2) | 2(1)  | -2(1)  | 1(1)   |
| C(38B) | 38(1) | 48(1) | 43(1) | 4(1)  | 2(1)   | 7(1)   |
| O(1W)  | 75(1) | 39(1) | 55(1) | 0(1)  | 4(1)   | 13(1)  |

**Table S39.** Hydrogen coordinates ( $\times 10^4$ ) and isotropic displacement parameters ( $\text{\AA}^2 \times 10^{-3}$ ) for gellman124a.

|        | x         | y          | z        | U(eq) |
|--------|-----------|------------|----------|-------|
| H(1)   | -1024(15) | -8116(14)  | -1222(8) | 39    |
| H(2)   | -1713(15) | -8355(12)  | 264(8)   | 33    |
| H(3)   | -1152(14) | -10494(13) | -215(8)  | 33    |
| H(4)   | -1226(15) | -12650(13) | 516(8)   | 34    |
| H(1B)  | 436       | -10205     | -1356    | 70    |
| H(1D)  | 40        | -10995     | -1534    | 70    |
| H(1C)  | -340      | -10548     | -1090    | 70    |
| H(2C)  | -537      | -9561      | -2397    | 71    |
| H(2D)  | -34       | -10346     | -2347    | 71    |
| H(2B)  | 309       | -9565      | -2121    | 71    |
| H(3C)  | -1693     | -10539     | -1518    | 75    |
| H(3D)  | -1307     | -10948     | -1974    | 75    |
| H(3B)  | -1754     | -10134     | -2027    | 75    |
| H(6)   | -2083     | -8412      | -511     | 35    |
| H(7B)  | -2017     | -7082      | -340     | 54    |
| H(7C)  | -2193     | -7183      | -895     | 54    |
| H(7A)  | -1301     | -6968      | -716     | 54    |
| H(9)   | -128      | -8219      | 541      | 33    |
| H(10C) | -1033     | -7382      | 927      | 42    |
| H(10D) | -1588     | -8090      | 1090     | 42    |
| H(11D) | -801      | -7703      | 1738     | 47    |
| H(11C) | 13        | -7784      | 1433     | 47    |
| H(12D) | -1010     | -9047      | 1709     | 45    |
| H(12C) | -122      | -8887      | 1916     | 45    |
| H(13D) | -70       | -9871      | 1330     | 41    |
| H(13C) | 457       | -9144      | 1166     | 41    |
| H(14A) | -1155     | -9468      | 840      | 32    |
| H(15A) | -459      | -9524      | 54       | 33    |
| H(16C) | 875       | -9230      | 328      | 42    |
| H(16D) | 892       | -10033     | 608      | 42    |
| H(17D) | 746       | -9916      | -402     | 65    |
| H(17F) | 799       | -10712     | -117     | 65    |
| H(17E) | 1564      | -10147     | -133     | 65    |
| H(19A) | -778      | -11934     | -18      | 35    |
| H(20D) | -2036     | -11361     | -623     | 56    |
| H(20F) | -1782     | -12250     | -598     | 56    |
| H(20E) | -1156     | -11624     | -796     | 56    |
| H(22A) | -2716     | -12426     | 970      | 37    |
| H(23C) | -2835     | -13519     | 474      | 42    |
| H(23D) | -2044     | -13895     | 706      | 42    |
| H(24C) | -3551     | -13649     | 1187     | 47    |
| H(24D) | -3187     | -14474     | 1047     | 47    |
| H(25C) | -2135     | -14333     | 1596     | 48    |
| H(25D) | -2975     | -14195     | 1867     | 48    |
| H(26D) | -2016     | -13231     | 2077     | 46    |
| H(26C) | -2793     | -12851     | 1831     | 46    |
| H(27A) | -1304     | -13173     | 1348     | 36    |
| H(28A) | -1098     | -11821     | 1291     | 37    |
| H(29C) | -2482     | -11411     | 1430     | 49    |
| H(29D) | -2336     | -11566     | 1984     | 49    |

|        |           |            |          |    |
|--------|-----------|------------|----------|----|
| H(30D) | -1421     | -10473     | 1440     | 65 |
| H(30F) | -1307     | -10615     | 1997     | 65 |
| H(30E) | -2127     | -10241     | 1801     | 65 |
| H(32F) | 511       | -13297     | 2213     | 50 |
| H(32E) | 217       | -12558     | 2508     | 50 |
| H(34B) | 655       | -11305     | 1883     | 74 |
| H(35B) | 1848      | -10681     | 1679     | 92 |
| H(36B) | 3087      | -11313     | 1762     | 81 |
| H(37B) | 3115      | -12585     | 2000     | 74 |
| H(38B) | 1930      | -13213     | 2197     | 63 |
| H(1A)  | -4395(15) | -11802(14) | -1239(8) | 39 |
| H(2A)  | -3837(15) | -11610(13) | 279(8)   | 33 |
| H(3A)  | -4289(14) | -9434(13)  | -198(8)  | 34 |
| H(4A)  | -4248(15) | -7291(13)  | 558(8)   | 34 |
| H(1AB) | -5061     | -9333      | -1092    | 69 |
| H(1AC) | -5766     | -9672      | -1421    | 69 |
| H(1AA) | -5342     | -8873      | -1556    | 69 |
| H(2AA) | -5011     | -9433      | -2365    | 84 |
| H(2AC) | -5454     | -10210     | -2203    | 84 |
| H(2AB) | -4541     | -10238     | -2392    | 84 |
| H(3AA) | -3855     | -8921      | -1862    | 74 |
| H(3AC) | -3425     | -9747      | -1889    | 74 |
| H(3AB) | -3622     | -9368      | -1384    | 74 |
| H(6A)  | -3414     | -11564     | -482     | 36 |
| H(7AC) | -4198     | -12980     | -742     | 56 |
| H(7AB) | -3511     | -12903     | -345     | 56 |
| H(7AA) | -3292     | -12763     | -892     | 56 |
| H(9A)  | -5421     | -11726     | 529      | 35 |
| H(10B) | -4598     | -12607     | 936      | 43 |
| H(10A) | -4017     | -11928     | 1115     | 43 |
| H(11A) | -4893     | -12275     | 1738     | 46 |
| H(11B) | -5668     | -12132     | 1407     | 46 |
| H(12A) | -5475     | -11042     | 1903     | 47 |
| H(12B) | -4568     | -10943     | 1711     | 47 |
| H(13A) | -5432     | -10062     | 1316     | 42 |
| H(13B) | -5997     | -10757     | 1142     | 42 |
| H(14)  | -4353     | -10524     | 847      | 33 |
| H(15)  | -4970     | -10426     | 48       | 33 |
| H(16B) | -6340     | -10719     | 269      | 40 |
| H(16A) | -6385     | -9916      | 547      | 40 |
| H(17B) | -6124     | -10037     | -454     | 61 |
| H(17A) | -6201     | -9239      | -172     | 61 |
| H(17C) | -6968     | -9798      | -218     | 61 |
| H(19)  | -4713     | -8002      | 29       | 34 |
| H(20A) | -3707     | -7624      | -538     | 53 |
| H(20C) | -4334     | -8234      | -754     | 53 |
| H(20B) | -3452     | -8510      | -593     | 53 |
| H(22)  | -2806     | -7565      | 1044     | 36 |
| H(23A) | -2609     | -6462      | 566      | 42 |
| H(23B) | -3392     | -6058      | 790      | 42 |
| H(24B) | -1936     | -6407      | 1304     | 47 |
| H(24A) | -2225     | -5557      | 1160     | 47 |
| H(25B) | -2544     | -5822      | 1968     | 47 |
| H(25A) | -3349     | -5650      | 1670     | 47 |
| H(26B) | -3564     | -6745      | 2144     | 45 |
| H(26A) | -2779     | -7154      | 1927     | 45 |

|        |       |        |      |    |
|--------|-------|--------|------|----|
| H(27)  | -4224 | -6806  | 1405 | 37 |
| H(28)  | -4404 | -8162  | 1323 | 37 |
| H(29A) | -3003 | -8528  | 1510 | 44 |
| H(29B) | -3252 | -8449  | 2057 | 44 |
| H(30A) | -3940 | -9517  | 1396 | 61 |
| H(30C) | -4306 | -9391  | 1916 | 61 |
| H(30B) | -3415 | -9738  | 1853 | 61 |
| H(32A) | -6221 | -6861  | 2178 | 47 |
| H(32B) | -5846 | -7522  | 2508 | 47 |
| H(32C) | -6245 | -6868  | 2179 | 47 |
| H(32D) | -5868 | -7535  | 2510 | 47 |
| H(34)  | -6100 | -8903  | 2167 | 52 |
| H(35)  | -7170 | -9755  | 2022 | 68 |
| H(36)  | -8456 | -9275  | 1840 | 79 |
| H(37)  | -8672 | -7943  | 1803 | 68 |
| H(38)  | -7602 | -7091  | 1948 | 52 |
| H(34A) | -5989 | -8901  | 1866 | 52 |
| H(35A) | -7049 | -9695  | 1613 | 68 |
| H(36A) | -8377 | -9227  | 1609 | 79 |
| H(37A) | -8645 | -7966  | 1857 | 68 |
| H(38A) | -7585 | -7172  | 2111 | 52 |
| H(1W)  | -2830 | -9566  | 541  | 84 |
| H(2W)  | -2654 | -10423 | 553  | 84 |

---

**Table S40.** Torsion angles [°] for gellman124a.

|                         |             |                             |             |
|-------------------------|-------------|-----------------------------|-------------|
| C(5)-O(1)-C(4)-C(1)     | -62.0(3)    | C(24)-C(25)-C(26)-C(27)     | -56.6(3)    |
| C(5)-O(1)-C(4)-C(3)     | 62.5(3)     | C(25)-C(26)-C(27)-C(22)     | 57.7(2)     |
| C(5)-O(1)-C(4)-C(2)     | -179.26(19) | C(25)-C(26)-C(27)-C(28)     | -176.19(18) |
| C(4)-O(1)-C(5)-O(2)     | 6.1(3)      | N(4)-C(22)-C(27)-C(26)      | -178.65(16) |
| C(4)-O(1)-C(5)-N(1)     | -172.75(18) | C(23)-C(22)-C(27)-C(26)     | -57.1(2)    |
| C(6)-N(1)-C(5)-O(2)     | 12.2(3)     | N(4)-C(22)-C(27)-C(28)      | 55.4(2)     |
| C(6)-N(1)-C(5)-O(1)     | -168.94(18) | C(23)-C(22)-C(27)-C(28)     | 176.93(17)  |
| C(5)-N(1)-C(6)-C(8)     | 64.3(2)     | C(26)-C(27)-C(28)-C(31)     | 66.2(2)     |
| C(5)-N(1)-C(6)-C(7)     | -174.62(19) | C(22)-C(27)-C(28)-C(31)     | -169.32(16) |
| C(9)-N(2)-C(8)-O(3)     | 1.6(3)      | C(26)-C(27)-C(28)-C(29)     | -58.9(2)    |
| C(9)-N(2)-C(8)-C(6)     | -177.30(16) | C(22)-C(27)-C(28)-C(29)     | 65.6(2)     |
| N(1)-C(6)-C(8)-O(3)     | 28.6(2)     | C(31)-C(28)-C(29)-C(30)     | 68.0(2)     |
| C(7)-C(6)-C(8)-O(3)     | -92.0(2)    | C(27)-C(28)-C(29)-C(30)     | -167.67(19) |
| N(1)-C(6)-C(8)-N(2)     | -152.47(16) | C(32)-O(7)-C(31)-O(6)       | -2.4(3)     |
| C(7)-C(6)-C(8)-N(2)     | 86.9(2)     | C(32)-O(7)-C(31)-C(28)      | 178.49(16)  |
| C(8)-N(2)-C(9)-C(10)    | 137.80(18)  | C(29)-C(28)-C(31)-O(6)      | 12.1(3)     |
| C(8)-N(2)-C(9)-C(14)    | -99.3(2)    | C(27)-C(28)-C(31)-O(6)      | -115.2(2)   |
| N(2)-C(9)-C(10)-C(11)   | 178.03(17)  | C(29)-C(28)-C(31)-O(7)      | -168.84(16) |
| C(14)-C(9)-C(10)-C(11)  | 55.4(2)     | C(27)-C(28)-C(31)-O(7)      | 63.8(2)     |
| C(9)-C(10)-C(11)-C(12)  | -55.4(3)    | C(31)-O(7)-C(32)-C(33)      | -112.5(2)   |
| C(10)-C(11)-C(12)-C(13) | 56.0(3)     | O(7)-C(32)-C(33)-C(38)      | -134.9(2)   |
| C(11)-C(12)-C(13)-C(14) | -58.0(2)    | O(7)-C(32)-C(33)-C(34)      | 44.1(3)     |
| N(2)-C(9)-C(14)-C(13)   | -175.02(16) | C(38)-C(33)-C(34)-C(35)     | -0.7(4)     |
| C(10)-C(9)-C(14)-C(13)  | -54.3(2)    | C(32)-C(33)-C(34)-C(35)     | -179.7(3)   |
| N(2)-C(9)-C(14)-C(15)   | 58.9(2)     | C(33)-C(34)-C(35)-C(36)     | -0.8(5)     |
| C(10)-C(9)-C(14)-C(15)  | 179.58(16)  | C(34)-C(35)-C(36)-C(37)     | 2.1(5)      |
| C(12)-C(13)-C(14)-C(9)  | 56.4(2)     | C(35)-C(36)-C(37)-C(38)     | -1.8(5)     |
| C(12)-C(13)-C(14)-C(15) | -179.30(16) | C(36)-C(37)-C(38)-C(33)     | 0.2(4)      |
| C(9)-C(14)-C(15)-C(18)  | -150.29(16) | C(34)-C(33)-C(38)-C(37)     | 1.0(4)      |
| C(13)-C(14)-C(15)-C(18) | 86.3(2)     | C(32)-C(33)-C(38)-C(37)     | -179.9(2)   |
| C(9)-C(14)-C(15)-C(16)  | 85.5(2)     | C(5A)-O(1A)-C(4A)-C(3A)     | 59.1(3)     |
| C(13)-C(14)-C(15)-C(16) | -37.9(2)    | C(5A)-O(1A)-C(4A)-C(2A)     | 177.1(2)    |
| C(18)-C(15)-C(16)-C(17) | 61.2(2)     | C(5A)-O(1A)-C(4A)-C(1A)     | -65.9(3)    |
| C(14)-C(15)-C(16)-C(17) | -173.04(17) | C(4A)-O(1A)-C(5A)-O(2A)     | 6.1(3)      |
| C(19)-N(3)-C(18)-O(4)   | -5.8(3)     | C(4A)-O(1A)-C(5A)-N(1A)     | -171.81(18) |
| C(19)-N(3)-C(18)-C(15)  | 171.79(16)  | C(6A)-N(1A)-C(5A)-O(2A)     | 7.3(3)      |
| C(16)-C(15)-C(18)-O(4)  | 61.1(2)     | C(6A)-N(1A)-C(5A)-O(1A)     | -174.76(18) |
| C(14)-C(15)-C(18)-O(4)  | -66.3(2)    | C(5A)-N(1A)-C(6A)-C(8A)     | 67.3(2)     |
| C(16)-C(15)-C(18)-N(3)  | -116.49(19) | C(5A)-N(1A)-C(6A)-C(7A)     | -171.71(19) |
| C(14)-C(15)-C(18)-N(3)  | 116.10(19)  | C(9A)-N(2A)-C(8A)-O(3A)     | -2.2(3)     |
| C(18)-N(3)-C(19)-C(20)  | -165.70(18) | C(9A)-N(2A)-C(8A)-C(6A)     | 179.21(16)  |
| C(18)-N(3)-C(19)-C(21)  | 72.7(2)     | N(1A)-C(6A)-C(8A)-O(3A)     | 31.1(2)     |
| C(22)-N(4)-C(21)-O(5)   | -2.1(3)     | C(7A)-C(6A)-C(8A)-O(3A)     | -89.8(2)    |
| C(22)-N(4)-C(21)-C(19)  | -179.41(17) | N(1A)-C(6A)-C(8A)-N(2A)     | -150.28(16) |
| N(3)-C(19)-C(21)-O(5)   | 57.9(2)     | C(7A)-C(6A)-C(8A)-N(2A)     | 88.8(2)     |
| C(20)-C(19)-C(21)-O(5)  | -63.7(2)    | C(8A)-N(2A)-C(9A)-C(10A)    | 136.98(18)  |
| N(3)-C(19)-C(21)-N(4)   | -124.68(18) | C(8A)-N(2A)-C(9A)-C(14A)    | -99.3(2)    |
| C(20)-C(19)-C(21)-N(4)  | 113.68(19)  | N(2A)-C(9A)-C(10A)-C(11A)   | 178.37(17)  |
| C(21)-N(4)-C(22)-C(23)  | 113.0(2)    | C(14A)-C(9A)-C(10A)-C(11A)  | 55.2(2)     |
| C(21)-N(4)-C(22)-C(27)  | -125.29(19) | C(9A)-C(10A)-C(11A)-C(12A)  | -56.7(2)    |
| N(4)-C(22)-C(23)-C(24)  | 178.48(17)  | C(10A)-C(11A)-C(12A)-C(13A) | 57.8(2)     |
| C(27)-C(22)-C(23)-C(24) | 56.5(2)     | C(11A)-C(12A)-C(13A)-C(14A) | -58.5(2)    |
| C(22)-C(23)-C(24)-C(25) | -55.3(2)    | C(12A)-C(13A)-C(14A)-C(9A)  | 55.5(2)     |
| C(23)-C(24)-C(25)-C(26) | 54.7(3)     | C(12A)-C(13A)-C(14A)-C(15A) | 179.86(16)  |

|                             |             |                             |             |
|-----------------------------|-------------|-----------------------------|-------------|
| N(2A)-C(9A)-C(14A)-C(13A)   | -175.24(16) | C(32A)-C(33A)-C(34A)-C(35A) | 178.2(3)    |
| C(10A)-C(9A)-C(14A)-C(13A)  | -53.3(2)    | C(33A)-C(34A)-C(35A)-C(36A) | 0.0         |
| N(2A)-C(9A)-C(14A)-C(15A)   | 58.5(2)     | C(34A)-C(35A)-C(36A)-C(37A) | 0.0         |
| C(10A)-C(9A)-C(14A)-C(15A)  | -179.57(17) | C(35A)-C(36A)-C(37A)-C(38A) | 0.0         |
| C(13A)-C(14A)-C(15A)-C(18A) | 82.1(2)     | C(36A)-C(37A)-C(38A)-C(33A) | 0.0         |
| C(9A)-C(14A)-C(15A)-C(18A)  | -153.96(16) | C(34A)-C(33A)-C(38A)-C(37A) | 0.0         |
| C(13A)-C(14A)-C(15A)-C(16A) | -41.5(2)    | C(32A)-C(33A)-C(38A)-C(37A) | -178.1(3)   |
| C(9A)-C(14A)-C(15A)-C(16A)  | 82.4(2)     | O(7A)-C(32A)-C(33B)-C(34B)  | 43.4(4)     |
| C(18A)-C(15A)-C(16A)-C(17A) | 62.1(2)     | C(33A)-C(32A)-C(33B)-C(34B) | -136(3)     |
| C(14A)-C(15A)-C(16A)-C(17A) | -172.38(17) | O(7A)-C(32A)-C(33B)-C(38B)  | -136.83(13) |
| C(19A)-N(3A)-C(18A)-O(4A)   | -6.0(3)     | C(33A)-C(32A)-C(33B)-C(38B) | 44(2)       |
| C(19A)-N(3A)-C(18A)-C(15A)  | 171.07(16)  | C(38B)-C(33B)-C(34B)-C(35B) | 0.0         |
| C(16A)-C(15A)-C(18A)-O(4A)  | 64.1(2)     | C(32A)-C(33B)-C(34B)-C(35B) | 179.8(5)    |
| C(14A)-C(15A)-C(18A)-O(4A)  | -63.2(2)    | C(33B)-C(34B)-C(35B)-C(36B) | 0.0         |
| C(16A)-C(15A)-C(18A)-N(3A)  | -113.01(19) | C(34B)-C(35B)-C(36B)-C(37B) | 0.0         |
| C(14A)-C(15A)-C(18A)-N(3A)  | 119.70(18)  | C(35B)-C(36B)-C(37B)-C(38B) | 0.0         |
| C(18A)-N(3A)-C(19A)-C(20A)  | -164.34(17) | C(36B)-C(37B)-C(38B)-C(33B) | 0.0         |
| C(18A)-N(3A)-C(19A)-C(21A)  | 73.6(2)     | C(34B)-C(33B)-C(38B)-C(37B) | 0.0         |
| C(22A)-N(4A)-C(21A)-O(5A)   | -3.6(3)     | C(32A)-C(33B)-C(38B)-C(37B) | -179.8(5)   |
| C(22A)-N(4A)-C(21A)-C(19A)  | 178.63(17)  |                             |             |
| N(3A)-C(19A)-C(21A)-O(5A)   | 55.8(2)     |                             |             |
| C(20A)-C(19A)-C(21A)-O(5A)  | -66.4(2)    |                             |             |
| N(3A)-C(19A)-C(21A)-N(4A)   | -126.34(18) |                             |             |
| C(20A)-C(19A)-C(21A)-N(4A)  | 111.47(19)  |                             |             |
| C(21A)-N(4A)-C(22A)-C(23A)  | 111.5(2)    |                             |             |
| C(21A)-N(4A)-C(22A)-C(27A)  | -125.69(19) |                             |             |
| N(4A)-C(22A)-C(23A)-C(24A)  | 179.13(17)  |                             |             |
| C(27A)-C(22A)-C(23A)-C(24A) | 56.6(2)     |                             |             |
| C(22A)-C(23A)-C(24A)-C(25A) | -57.1(2)    |                             |             |
| C(23A)-C(24A)-C(25A)-C(26A) | 56.6(2)     |                             |             |
| C(24A)-C(25A)-C(26A)-C(27A) | -56.3(3)    |                             |             |
| C(25A)-C(26A)-C(27A)-C(22A) | 55.2(2)     |                             |             |
| C(25A)-C(26A)-C(27A)-C(28A) | -179.99(18) |                             |             |
| N(4A)-C(22A)-C(27A)-C(26A)  | -176.89(15) |                             |             |
| C(23A)-C(22A)-C(27A)-C(26A) | -54.8(2)    |                             |             |
| N(4A)-C(22A)-C(27A)-C(28A)  | 57.7(2)     |                             |             |
| C(23A)-C(22A)-C(27A)-C(28A) | 179.77(17)  |                             |             |
| C(26A)-C(27A)-C(28A)-C(31A) | 66.9(2)     |                             |             |
| C(22A)-C(27A)-C(28A)-C(31A) | -168.94(17) |                             |             |
| C(26A)-C(27A)-C(28A)-C(29A) | -57.8(2)    |                             |             |
| C(22A)-C(27A)-C(28A)-C(29A) | 66.4(2)     |                             |             |
| C(31A)-C(28A)-C(29A)-C(30A) | 72.9(2)     |                             |             |
| C(27A)-C(28A)-C(29A)-C(30A) | -162.91(18) |                             |             |
| C(32A)-O(7A)-C(31A)-O(6A)   | -3.3(3)     |                             |             |
| C(32A)-O(7A)-C(31A)-C(28A)  | 176.56(16)  |                             |             |
| C(29A)-C(28A)-C(31A)-O(6A)  | 17.1(3)     |                             |             |
| C(27A)-C(28A)-C(31A)-O(6A)  | -110.2(2)   |                             |             |
| C(29A)-C(28A)-C(31A)-O(7A)  | -162.73(16) |                             |             |
| C(27A)-C(28A)-C(31A)-O(7A)  | 70.0(2)     |                             |             |
| C(31A)-O(7A)-C(32A)-C(33A)  | -109.3(2)   |                             |             |
| C(31A)-O(7A)-C(32A)-C(33B)  | -109.4(3)   |                             |             |
| O(7A)-C(32A)-C(33A)-C(34A)  | 62.9(3)     |                             |             |
| C(33B)-C(32A)-C(33A)-C(34A) | 63(2)       |                             |             |
| O(7A)-C(32A)-C(33A)-C(38A)  | -119.0(2)   |                             |             |
| C(33B)-C(32A)-C(33A)-C(38A) | -119(2)     |                             |             |
| C(38A)-C(33A)-C(34A)-C(35A) | 0.0         |                             |             |

Symmetry transformations used to generate equivalent atoms:

## Crystallographic Experimental Section for Compound 2a

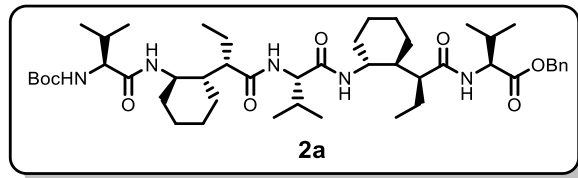

### Data Collection

A colorless crystal with approximate dimensions  $0.684 \times 0.524 \times 0.42 \text{ mm}^3$  was selected under oil under ambient conditions and attached to the tip of a MiTeGen MicroMount<sup>®</sup>. The crystal was mounted in a stream of cold nitrogen at 100(1) K and centered in the X-ray beam by using a video camera.

The crystal evaluation and data collection were performed on a Bruker SMART APEXII diffractometer with Cu K $\alpha$  ( $\lambda = 1.54178 \text{ \AA}$ ) radiation and the diffractometer to crystal distance of 4.03 cm.

The initial cell constants were obtained from three series of  $\omega$  scans at different starting angles. Each series consisted of 41 frames collected at intervals of  $0.6^\circ$  in a  $25^\circ$  range about  $\omega$  with the exposure time of 1 second per frame. The reflections were successfully indexed by an automated indexing routine built in the APEXII program. The final cell constants were calculated from a set of 9984 strong reflections from the actual data collection.

The data were collected by using the full sphere data collection routine to survey the reciprocal space to the extent of a full sphere to a resolution of  $0.8 \text{ \AA}$ . A total of 84596 data were harvested by collecting 16 sets of frames with  $0.6^\circ$  scans in  $\omega$  and  $\phi$  with an exposure time 2/6/10 sec per frame. These highly redundant datasets were corrected for Lorentz and polarization effects. The absorption correction was based on fitting a function to the empirical transmission surface as sampled by multiple equivalent measurements. [1]

### Structure Solution and Refinement

The systematic absences in the diffraction data were uniquely consistent for the space group  $P2_12_12_1$  that yielded chemically reasonable and computationally stable results of refinement [2-4].

A successful solution by the direct methods provided most non-hydrogen atoms from the *E*-map. The remaining non-hydrogen atoms were located in an alternating series of least-squares cycles and difference Fourier maps. All non-hydrogen atoms were refined with anisotropic displacement coefficients. All non-amide hydrogen atoms were included in the structure factor calculation at idealized positions and were allowed to ride on the neighboring atoms with relative isotropic displacement coefficients. The amide hydrogens were located in the difference Fourier map and refined independently.

There is one solvent accessible void in the asymmetric unit. The void is occupied by a heptane molecule 70.26(18)% of the time and a chloroform molecule the rest of the time. The solvent molecules were refined with six constraints and restraints.

The absolute configuration has been unequivocally established as follows: C9(S), C14(S), C17(S), C22(R), C24(S), C29(S), C32(S), C37(R), C39(S).

The final least-squares refinement of 669 parameters against 10935 data resulted in residuals  $R$  (based on  $F^2$  for  $I \geq 2\sigma$ ) and  $wR$  (based on  $F^2$  for all data) of 0.0315 and 0.0809, respectively. The final difference Fourier map was featureless.

## Summary

**Crystal Data** for  $C_{52.21542}H_{88.53855}Cl_{0.89229}N_5O_8$  ( $M = 946.03$ ): orthorhombic, space group  $P2_12_12_1$  (no. 19),  $a = 12.0179(19)$  Å,  $b = 17.559(4)$  Å,  $c = 26.124(4)$  Å,  $V = 5512.9(16)$  Å<sup>3</sup>,  $Z = 4$ ,  $T = 100.01$  K,  $\mu(\text{Cu K}\alpha) = 0.988$  mm<sup>-1</sup>,  $D_{\text{calc}} = 1.140$  g/mm<sup>3</sup>, 84596 reflections measured ( $6.064 \leq 2\theta \leq 146.28$ ), 10935 unique ( $R_{\text{int}} = 0.0217$ ) which were used in all calculations. The final  $R_1$  was 0.0315 ( $I > 2\sigma(I)$ ) and  $wR_2$  was 0.0809 (all data).

## References

- [1] Bruker-AXS. (2007-2011) APEX2, SADABS, and SAINT Software Reference Manuals. Bruker-AXS, Madison, Wisconsin, USA.
- [2] Sheldrick, G. M. (2008) SHELXL. *Acta Cryst.* **A64**, 112-122.
- [3] Dolomanov, O.V.; Bourhis, L.J.; Gildea, R.J.; Howard, J.A.K.; Puschmann, H. "OLEX2: a complete structure solution, refinement and analysis program". *J. Appl. Cryst.* (2009) **42**, 339-341.
- [4] Guzei, I.A. (2013). Internal laboratory computer programs Gn.



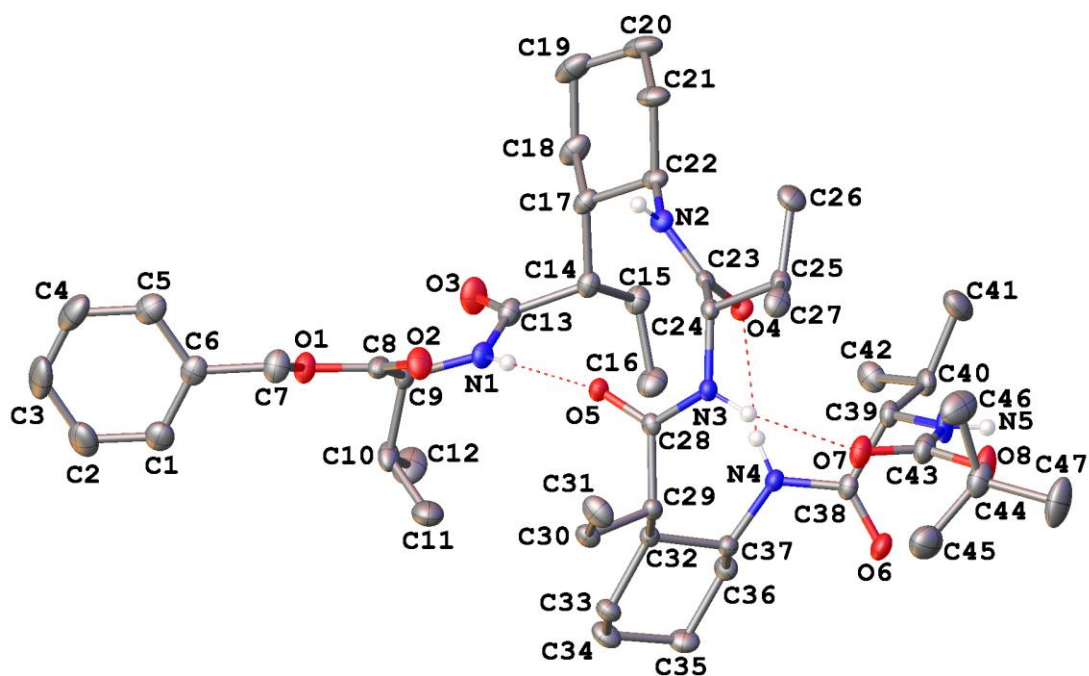

**Figure S26.** A molecular drawing of Gellman149 shown with 50% probability ellipsoids. All non-amide H atoms are omitted.

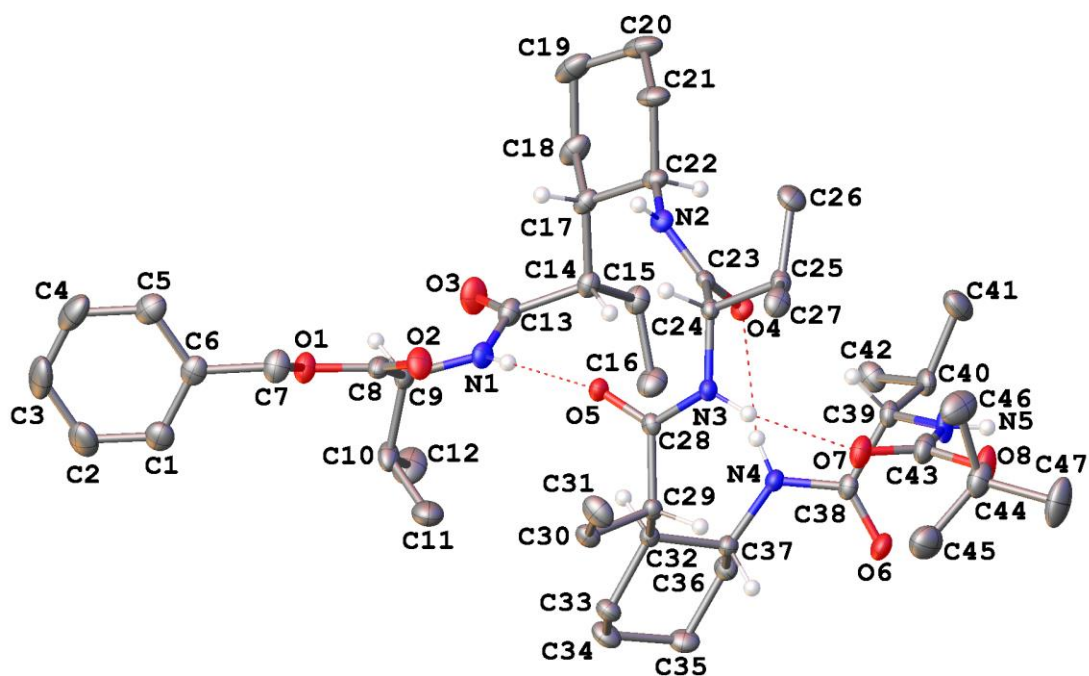

**Figure S27.** A molecular drawing of Gellman149 shown with 50% probability ellipsoids. All H atoms on achiral C atoms are omitted.

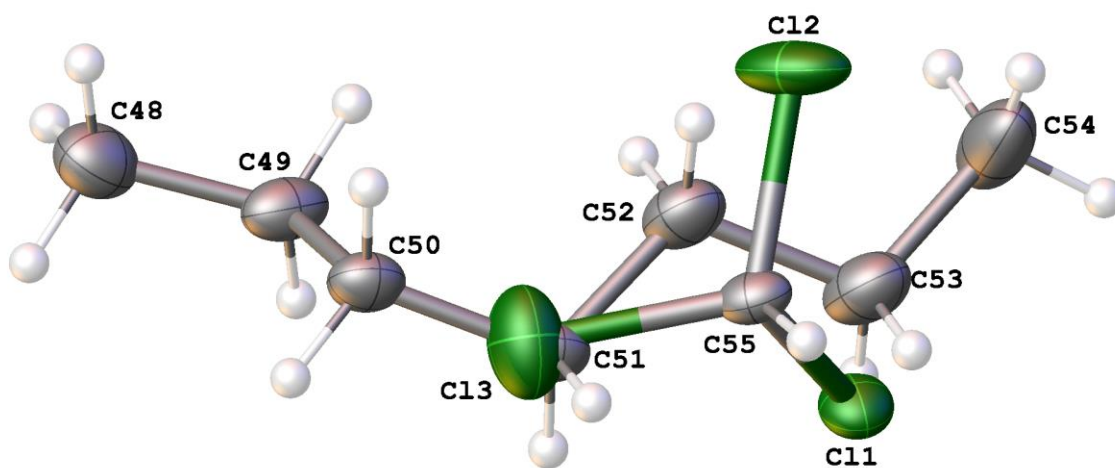

**Figure S28.** A molecular drawing of the solvents in Gellman149 shown with 50% probability ellipsoids. The heptane is present ~70% of the time and the chloroform ~30%.

**Table S41.** Crystal data and structure refinement for Gellman149

|                                                   |                                                                                                                                                        |
|---------------------------------------------------|--------------------------------------------------------------------------------------------------------------------------------------------------------|
| <b>Identification code</b>                        | Gellman149                                                                                                                                             |
| <b>Empirical formula</b>                          | C <sub>47</sub> H <sub>77</sub> N <sub>5</sub> O <sub>8</sub> · (C <sub>7</sub> H <sub>16</sub> ) <sub>0.7</sub> · (CHCl <sub>3</sub> ) <sub>0.3</sub> |
| <b>Formula weight</b>                             | 946.03                                                                                                                                                 |
| <b>Temperature/K</b>                              | 100.01                                                                                                                                                 |
| <b>Crystal system</b>                             | orthorhombic                                                                                                                                           |
| <b>Space group</b>                                | P2 <sub>1</sub> 2 <sub>1</sub> 2 <sub>1</sub>                                                                                                          |
| <b>a/Å</b>                                        | 12.0179(19)                                                                                                                                            |
| <b>b/Å</b>                                        | 17.559(4)                                                                                                                                              |
| <b>c/Å</b>                                        | 26.124(4)                                                                                                                                              |
| <b>α/°</b>                                        | 90                                                                                                                                                     |
| <b>β/°</b>                                        | 90                                                                                                                                                     |
| <b>γ/°</b>                                        | 90                                                                                                                                                     |
| <b>Volume/Å<sup>3</sup></b>                       | 5512.9(16)                                                                                                                                             |
| <b>Z</b>                                          | 4                                                                                                                                                      |
| <b>ρ<sub>calc</sub>/mg/mm<sup>3</sup></b>         | 1.140                                                                                                                                                  |
| <b>m/mm<sup>-1</sup></b>                          | 0.988                                                                                                                                                  |
| <b>F(000)</b>                                     | 2064.0                                                                                                                                                 |
| <b>Crystal size/mm<sup>3</sup></b>                | 0.684 × 0.524 × 0.42                                                                                                                                   |
| <b>2θ range for data collection</b>               | 6.064 to 146.28°                                                                                                                                       |
| <b>Index ranges</b>                               | -14 ≤ h ≤ 14, -21 ≤ k ≤ 19, -32 ≤ l ≤ 32                                                                                                               |
| <b>Reflections collected</b>                      | 84596                                                                                                                                                  |
| <b>Independent reflections</b>                    | 10935[R(int) = 0.0217]                                                                                                                                 |
| <b>Data/restraints/parameters</b>                 | 10935/6/669                                                                                                                                            |
| <b>Goodness-of-fit on F<sup>2</sup></b>           | 1.097                                                                                                                                                  |
| <b>Final R indexes [I ≥ 2σ (I)]</b>               | R <sub>1</sub> = 0.0315, wR <sub>2</sub> = 0.0807                                                                                                      |
| <b>Final R indexes [all data]</b>                 | R <sub>1</sub> = 0.0317, wR <sub>2</sub> = 0.0809                                                                                                      |
| <b>Largest diff. peak/hole / e Å<sup>-3</sup></b> | 0.42/-0.19                                                                                                                                             |
| <b>Flack parameter</b>                            | 0.02(2)                                                                                                                                                |

**Table S42.** Fractional Atomic Coordinates (×10<sup>4</sup>) and Equivalent Isotropic Displacement Parameters (Å<sup>2</sup>×10<sup>3</sup>) for Gellman149. U<sub>eq</sub> is defined as 1/3 of the trace of the orthogonalised U<sub>ij</sub> tensor.

| Atom | x          | y          | z         | U(eq)   |
|------|------------|------------|-----------|---------|
| O1   | 3311.6(11) | 8846.9(7)  | 4760.2(5) | 23.8(3) |
| O2   | 4161.3(12) | 8301.1(8)  | 4091.1(5) | 27.7(3) |
| O3   | 775.1(12)  | 6966.8(9)  | 4044.3(6) | 32.5(3) |
| O4   | 3579.8(10) | 5836.7(7)  | 2474.3(5) | 18.1(2) |
| O5   | 4716.2(10) | 6813.3(7)  | 3378.4(4) | 18.0(2) |
| O6   | 5919.1(12) | 3589.0(7)  | 2888.4(5) | 24.4(3) |
| O7   | 7054.9(12) | 5097.5(8)  | 2210.8(5) | 26.8(3) |
| O8   | 7744.6(13) | 4223.6(9)  | 1646.1(6) | 37.1(4) |
| N1   | 2633.0(13) | 7178.8(9)  | 4037.9(6) | 19.6(3) |
| N2   | 3113.0(12) | 7082.4(9)  | 2376.5(6) | 17.3(3) |
| N3   | 5734.4(12) | 6341.5(8)  | 2729.7(5) | 15.7(3) |
| N4   | 5014.5(13) | 4670.3(8)  | 3110.6(5) | 16.4(3) |
| N5   | 5980.2(15) | 4155.4(10) | 1883.4(6) | 27.0(4) |

|     |            |             |            |         |
|-----|------------|-------------|------------|---------|
| C1  | 4089.9(17) | 9793.6(13)  | 5660.2(8)  | 29.6(4) |
| C2  | 3831.2(19) | 10287.2(15) | 6052.4(9)  | 38.4(5) |
| C3  | 3387(2)    | 10998.3(15) | 5945.0(11) | 45.4(6) |
| C4  | 3208(2)    | 11217.5(13) | 5445.9(11) | 42.3(6) |
| C5  | 3454.9(17) | 10718.9(12) | 5048.3(9)  | 31.9(5) |
| C6  | 3894.2(15) | 10003.7(11) | 5153.4(8)  | 24.6(4) |
| C7  | 4138.0(17) | 9456.8(11)  | 4728.1(8)  | 28.3(4) |
| C8  | 3449.7(15) | 8293(1)     | 4414.4(7)  | 19.8(4) |
| C9  | 2636.9(16) | 7646.1(10)  | 4496.9(7)  | 19.9(4) |
| C10 | 2963.2(18) | 7208.9(11)  | 4990.9(7)  | 26.4(4) |
| C11 | 4136(2)    | 6889.6(13)  | 4958.9(8)  | 34.4(5) |
| C12 | 2123(2)    | 6584.4(14)  | 5103.8(9)  | 42.1(6) |
| C13 | 1678.0(16) | 6914.5(11)  | 3829.3(7)  | 22.8(4) |
| C14 | 1816.2(15) | 6562.4(10)  | 3299.1(7)  | 19.9(3) |
| C15 | 1260.7(16) | 5776.5(11)  | 3278.2(7)  | 23.5(4) |
| C16 | 1881.7(19) | 5193.6(12)  | 3598.6(8)  | 31.4(4) |
| C17 | 1374.8(15) | 7129.7(10)  | 2892.8(7)  | 20.5(4) |
| C18 | 97.0(16)   | 7118.4(11)  | 2853.2(9)  | 29.9(4) |
| C19 | -349.7(18) | 7659.8(12)  | 2447.8(10) | 37.9(5) |
| C20 | 169.6(19)  | 7493.0(13)  | 1930.7(10) | 37.7(5) |
| C21 | 1438.4(17) | 7523.2(11)  | 1959.7(8)  | 28.9(4) |
| C22 | 1905.3(15) | 6981.4(10)  | 2365.3(7)  | 19.7(3) |
| C23 | 3839.5(14) | 6510.9(9)   | 2413.7(6)  | 15.2(3) |
| C24 | 5060.3(14) | 6747.5(9)   | 2355.4(6)  | 15.1(3) |
| C25 | 5502.7(15) | 6591.6(10)  | 1810.6(6)  | 19.6(4) |
| C26 | 4705.2(18) | 6893.9(12)  | 1401.8(7)  | 28.7(4) |
| C27 | 6653.5(17) | 6942.6(11)  | 1747.6(8)  | 26.3(4) |
| C28 | 5466.5(14) | 6393.3(9)   | 3228.9(6)  | 15.1(3) |
| C29 | 6163.5(14) | 5934.8(10)  | 3608.5(6)  | 15.6(3) |
| C30 | 6808.0(15) | 6521.2(10)  | 3934.3(7)  | 20.3(4) |
| C31 | 7598.2(18) | 6996.0(13)  | 3607.6(8)  | 30.5(4) |
| C32 | 5397.9(14) | 5385.3(9)   | 3917.0(6)  | 15.9(3) |
| C33 | 5795.9(16) | 5245.5(11)  | 4468.7(7)  | 20.8(4) |
| C34 | 5019.4(18) | 4707.4(12)  | 4759.4(7)  | 26.5(4) |
| C35 | 4887.8(17) | 3947.7(11)  | 4483.1(7)  | 25.5(4) |
| C36 | 4500.8(15) | 4075.8(10)  | 3934.6(7)  | 20.7(4) |
| C37 | 5305.3(15) | 4605.2(9)   | 3652.3(6)  | 17.2(3) |
| C38 | 5364.6(14) | 4154.2(10)  | 2770.5(7)  | 17.9(3) |
| C39 | 5036.2(16) | 4313.8(10)  | 2213.7(7)  | 20.1(4) |
| C40 | 4023.4(17) | 3842.3(11)  | 2041.9(7)  | 23.7(4) |
| C41 | 3653(2)    | 4094.8(15)  | 1508.7(8)  | 36.3(5) |
| C42 | 3053.1(18) | 3921.1(12)  | 2415.1(8)  | 27.9(4) |
| C43 | 6936.9(17) | 4540.8(11)  | 1937.2(8)  | 26.2(4) |
| C44 | 8804.5(18) | 4618.6(12)  | 1562.2(9)  | 31.2(5) |
| C45 | 9398(2)    | 4775.1(16)  | 2062.2(10) | 42.1(6) |
| C46 | 8578(2)    | 5336.6(15)  | 1259.4(10) | 43.7(6) |
| C47 | 9452(2)    | 4045.8(15)  | 1241.0(12) | 49.3(7) |
| C48 | 3223(3)    | 4289(2)     | 6266.7(15) | 44.0(8) |
| C49 | 2926(3)    | 3958(2)     | 5760.8(12) | 35.9(7) |
| C50 | 1982(3)    | 4380.8(17)  | 5489.1(11) | 30.9(6) |
| C51 | 1771(8)    | 4107(4)     | 4950(3)    | 30.9(6) |

|     |            |            |            |          |
|-----|------------|------------|------------|----------|
| C52 | 1422(3)    | 3274.1(19) | 4913.2(13) | 38.2(8)  |
| C53 | 1305(4)    | 2981(2)    | 4364.9(13) | 43.9(9)  |
| C54 | 909(5)     | 2157(2)    | 4350.6(15) | 61.2(13) |
| C11 | 1976.4(14) | 3169.6(10) | 4142.7(6)  | 32.4(5)  |
| C12 | 540(2)     | 2731.2(11) | 4971.6(8)  | 49.9(7)  |
| C13 | 1786(6)    | 4150(3)    | 5024.0(19) | 56.1(11) |
| C55 | 1074(6)    | 3507(4)    | 4618(3)    | 26.2(14) |

**Table S43.** Anisotropic Displacement Parameters ( $\text{\AA}^2 \times 10^3$ ) for Gellman149. The Anisotropic displacement factor exponent takes the form:  $-2\pi^2[h^2a^{*2}U_{11} + \dots + 2hka \times b \times U_{12}]$

| Atom | $U_{11}$ | $U_{22}$ | $U_{33}$ | $U_{23}$  | $U_{13}$  | $U_{12}$ |
|------|----------|----------|----------|-----------|-----------|----------|
| O1   | 26.0(7)  | 19.6(6)  | 25.9(6)  | -4.3(5)   | 7.8(5)    | -2.7(5)  |
| O2   | 35.4(8)  | 25.6(7)  | 22.1(6)  | 0.6(5)    | 11.9(6)   | -3.2(6)  |
| O3   | 22.3(7)  | 38.9(8)  | 36.4(8)  | -9.7(7)   | 12.1(6)   | -3.6(6)  |
| O4   | 21.0(6)  | 12.8(6)  | 20.6(6)  | 1.1(5)    | 0.2(5)    | -1.1(5)  |
| O5   | 18.5(6)  | 18.3(6)  | 17.2(6)  | -2.8(5)   | 1.6(5)    | 3.3(5)   |
| O6   | 29.4(7)  | 16.6(6)  | 27.1(6)  | -3.7(5)   | 1.8(5)    | 5.5(5)   |
| O7   | 29.2(7)  | 21.7(7)  | 29.4(7)  | -5.8(5)   | 10.2(6)   | 1.5(5)   |
| O8   | 35.6(8)  | 29.3(8)  | 46.4(9)  | -16.1(7)  | 21.4(7)   | -3.1(6)  |
| N1   | 19.4(7)  | 20.6(7)  | 18.8(7)  | -1.0(6)   | 7.3(6)    | 0.8(6)   |
| N2   | 19.6(7)  | 12.4(7)  | 20.0(7)  | 2.2(5)    | 0.5(6)    | -2.9(6)  |
| N3   | 17.3(7)  | 15.1(7)  | 14.6(7)  | -2.3(5)   | 1.2(5)    | 0.7(6)   |
| N4   | 19.4(7)  | 13.7(7)  | 16.3(7)  | -1.1(5)   | 1.2(6)    | 2.0(6)   |
| N5   | 33.1(9)  | 25.4(8)  | 22.5(8)  | -10.9(7)  | 10.2(7)   | 0.6(7)   |
| C1   | 22.7(9)  | 31.9(10) | 34.1(11) | -3.7(8)   | -4.5(8)   | -2.3(8)  |
| C2   | 31.3(11) | 48.0(13) | 36.0(11) | -13.2(10) | -8.8(9)   | -4.6(10) |
| C3   | 37.5(12) | 42.1(13) | 56.5(15) | -31.2(12) | -4.9(11)  | -2.6(10) |
| C4   | 34.4(12) | 22(1)    | 70.5(17) | -12.0(11) | -7.1(11)  | 2.6(9)   |
| C5   | 27.4(10) | 25(1)    | 43.2(12) | -0.3(9)   | -3.4(9)   | -4.4(8)  |
| C6   | 17.2(8)  | 23.3(9)  | 33.4(10) | -2.8(8)   | 1.5(7)    | -5.2(7)  |
| C7   | 26.5(10) | 24.5(9)  | 33.8(10) | -2.6(8)   | 7.9(8)    | -5.8(8)  |
| C8   | 24.6(9)  | 17.8(8)  | 17.2(8)  | 2.5(6)    | 2.1(7)    | 3.1(7)   |
| C9   | 23.2(9)  | 17.5(8)  | 18.9(8)  | -1.1(7)   | 7.1(7)    | 1.4(7)   |
| C10  | 42.9(11) | 19.2(9)  | 17.0(8)  | 0.0(7)    | 9.2(8)    | 0.1(8)   |
| C11  | 43.3(12) | 33.1(11) | 26.7(10) | 6.1(9)    | -4.6(9)   | 5.1(10)  |
| C12  | 56.6(15) | 31.2(11) | 38.5(12) | 12.3(9)   | 17.8(11)  | -3.8(11) |
| C13  | 22.9(9)  | 19.8(9)  | 25.7(9)  | -0.5(7)   | 6.7(7)    | 0.3(7)   |
| C14  | 17.1(8)  | 18.8(8)  | 23.9(9)  | -1.8(7)   | 3.0(7)    | -1.4(7)  |
| C15  | 24.1(9)  | 19.7(9)  | 26.9(9)  | -0.1(7)   | 4.5(7)    | -3.5(7)  |
| C16  | 38.1(12) | 22.4(9)  | 33.8(11) | 6.2(8)    | 5.7(9)    | -0.3(9)  |
| C17  | 16.7(8)  | 14.9(8)  | 29.8(9)  | -0.4(7)   | 1.2(7)    | -0.4(7)  |
| C18  | 17.3(9)  | 23.9(9)  | 48.6(12) | -1.4(9)   | 0.7(8)    | 0.2(7)   |
| C19  | 21.1(9)  | 25.5(10) | 67.1(16) | 0.1(10)   | -10.2(10) | 4.1(8)   |
| C20  | 31.4(11) | 28.5(11) | 53.1(14) | 10(1)     | -19.7(10) | 1.4(9)   |
| C21  | 30.4(10) | 23.6(9)  | 32.6(10) | 9.6(8)    | -10.0(8)  | 1.3(8)   |
| C22  | 20.5(9)  | 15.4(8)  | 23.3(8)  | 3.4(7)    | -4.3(7)   | -0.8(7)  |
| C23  | 19.8(8)  | 15.9(8)  | 10.0(7)  | 0.2(6)    | -0.4(6)   | -0.8(6)  |
| C24  | 20.0(8)  | 12.3(7)  | 13.1(7)  | -0.4(6)   | 1.3(6)    | -0.4(6)  |

|     |          |          |          |           |          |          |
|-----|----------|----------|----------|-----------|----------|----------|
| C25 | 27.1(9)  | 16.5(8)  | 15.1(8)  | -0.5(6)   | 4.8(7)   | -1.4(7)  |
| C26 | 35.5(11) | 33.6(11) | 17.0(8)  | 4.1(8)    | 1.6(8)   | 0.5(9)   |
| C27 | 28.8(10) | 25.3(9)  | 24.8(9)  | 2.7(8)    | 10.1(8)  | -1.2(8)  |
| C28 | 15.5(8)  | 14.3(8)  | 15.4(7)  | -1.7(6)   | 0.9(6)   | -3.4(6)  |
| C29 | 14.3(7)  | 17.4(8)  | 15.0(7)  | -2.0(6)   | 0.5(6)   | 0.2(6)   |
| C30 | 19.6(8)  | 23.5(9)  | 18.0(8)  | -0.3(7)   | -2.8(7)  | -2.4(7)  |
| C31 | 29.9(10) | 35.1(11) | 26.4(9)  | -0.1(8)   | -2.0(8)  | -13.9(9) |
| C32 | 17.2(8)  | 16.2(8)  | 14.4(7)  | -0.9(6)   | 0.9(6)   | 0.8(6)   |
| C33 | 23.1(9)  | 23.5(9)  | 15.8(8)  | 1.3(7)    | -2.3(7)  | -1.5(7)  |
| C34 | 32.5(10) | 31.7(10) | 15.4(8)  | 5.4(7)    | 0.2(7)   | -5.9(8)  |
| C35 | 28.4(10) | 25.3(10) | 22.8(9)  | 9.3(7)    | -0.2(8)  | -2.6(8)  |
| C36 | 24.9(9)  | 17.4(8)  | 19.9(8)  | 0.4(7)    | 0.0(7)   | -2.5(7)  |
| C37 | 19.1(8)  | 16.7(8)  | 15.8(8)  | -0.7(6)   | 0.5(6)   | 2.4(7)   |
| C38 | 18.6(8)  | 14.0(8)  | 21.1(8)  | -2.7(6)   | 3.0(7)   | -2.8(7)  |
| C39 | 25.4(9)  | 16.2(8)  | 18.7(8)  | -3.3(6)   | 5.3(7)   | 0.2(7)   |
| C40 | 30.4(10) | 18.7(8)  | 22.0(9)  | -6.5(7)   | -1.2(7)  | 0.0(7)   |
| C41 | 34.2(11) | 53.7(14) | 21.1(10) | -5.5(9)   | -1.3(8)  | 3.8(10)  |
| C42 | 30.1(10) | 27.7(10) | 25.8(9)  | -0.6(8)   | 0.0(8)   | -10.9(8) |
| C43 | 31.2(10) | 22.5(9)  | 25.0(9)  | -2.4(8)   | 10.0(8)  | 3.7(8)   |
| C44 | 31.0(11) | 25.4(10) | 37.2(11) | -4.3(8)   | 13.9(9)  | 0.6(8)   |
| C45 | 36.3(12) | 48.7(14) | 41.3(13) | -0.9(11)  | 5.5(10)  | 10.6(10) |
| C46 | 43.8(13) | 46.7(14) | 40.7(12) | 11.7(11)  | 17.3(11) | 8.9(11)  |
| C47 | 40.7(13) | 38.9(13) | 68.3(17) | -21.0(12) | 30.4(13) | -3.3(11) |
| C48 | 39.3(18) | 44.3(19) | 48(2)    | 7.1(16)   | -3.2(16) | -9.3(15) |
| C49 | 29.1(15) | 44.0(18) | 34.5(16) | 13.3(14)  | 1.7(13)  | 0.2(13)  |
| C50 | 32.3(14) | 28.6(13) | 31.8(14) | 9.0(11)   | 0.2(11)  | 0.2(11)  |
| C51 | 32.3(14) | 28.6(13) | 31.8(14) | 9.0(11)   | 0.2(11)  | 0.2(11)  |
| C52 | 48.7(19) | 36.8(17) | 29.1(16) | 7.1(14)   | 1.2(15)  | 4.8(15)  |
| C53 | 61(2)    | 40.4(19) | 30.3(16) | 6.6(15)   | 4.0(17)  | 4.9(17)  |
| C54 | 114(4)   | 38(2)    | 31.7(18) | -1.0(15)  | -12(2)   | -1(2)    |
| Cl1 | 28.7(9)  | 37.8(9)  | 30.9(9)  | -0.9(7)   | 9.6(7)   | -5.2(7)  |
| Cl2 | 64.3(14) | 34.8(10) | 50.7(12) | 17.0(9)   | 29.8(10) | 4.1(9)   |
| Cl3 | 51.2(16) | 56.6(17) | 60(2)    | -22.1(15) | -6.2(17) | 2.3(13)  |
| C55 | 29(3)    | 27(3)    | 22(3)    | 5(3)      | 7(3)     | 3(3)     |

**Table S44.** Bond Lengths for Gellman149.

| Atom | Atom | Length/Å | Atom | Atom | Length/Å |
|------|------|----------|------|------|----------|
| O1   | C7   | 1.463(2) | C17  | C22  | 1.540(3) |
| O1   | C8   | 1.338(2) | C18  | C19  | 1.521(3) |
| O2   | C8   | 1.202(2) | C19  | C20  | 1.517(4) |
| O3   | C13  | 1.225(2) | C20  | C21  | 1.528(3) |
| O4   | C23  | 1.234(2) | C21  | C22  | 1.531(2) |
| O5   | C28  | 1.229(2) | C23  | C24  | 1.532(2) |
| O6   | C38  | 1.234(2) | C24  | C25  | 1.544(2) |
| O7   | C43  | 1.219(2) | C25  | C26  | 1.530(3) |
| O8   | C43  | 1.353(2) | C25  | C27  | 1.523(3) |
| O8   | C44  | 1.467(3) | C28  | C29  | 1.528(2) |
| N1   | C9   | 1.453(2) | C29  | C30  | 1.544(2) |

|     |     |          |     |     |          |
|-----|-----|----------|-----|-----|----------|
| N1  | C13 | 1.353(3) | C29 | C32 | 1.558(2) |
| N2  | C22 | 1.463(2) | C30 | C31 | 1.525(3) |
| N2  | C23 | 1.334(2) | C32 | C33 | 1.538(2) |
| N3  | C24 | 1.456(2) | C32 | C37 | 1.538(2) |
| N3  | C28 | 1.346(2) | C33 | C34 | 1.530(3) |
| N4  | C37 | 1.462(2) | C34 | C35 | 1.525(3) |
| N4  | C38 | 1.337(2) | C35 | C36 | 1.523(3) |
| N5  | C39 | 1.452(2) | C36 | C37 | 1.531(2) |
| N5  | C43 | 1.341(3) | C38 | C39 | 1.533(2) |
| C1  | C2  | 1.378(3) | C39 | C40 | 1.539(3) |
| C1  | C6  | 1.394(3) | C40 | C41 | 1.528(3) |
| C2  | C3  | 1.387(4) | C40 | C42 | 1.526(3) |
| C3  | C4  | 1.376(4) | C44 | C45 | 1.514(3) |
| C4  | C5  | 1.390(3) | C44 | C46 | 1.513(3) |
| C5  | C6  | 1.390(3) | C44 | C47 | 1.523(3) |
| C6  | C7  | 1.497(3) | C48 | C49 | 1.488(5) |
| C8  | C9  | 1.514(3) | C49 | C50 | 1.530(4) |
| C9  | C10 | 1.552(3) | C50 | C51 | 1.510(7) |
| C10 | C11 | 1.519(3) | C51 | C52 | 1.525(7) |
| C10 | C12 | 1.520(3) | C52 | C53 | 1.528(4) |
| C13 | C14 | 1.526(2) | C53 | C54 | 1.524(5) |
| C14 | C15 | 1.534(2) | C11 | C55 | 1.752(7) |
| C14 | C17 | 1.549(3) | C12 | C55 | 1.766(7) |
| C15 | C16 | 1.518(3) | C13 | C55 | 1.770(9) |
| C17 | C18 | 1.539(2) |     |     |          |

**Table S45.** Bond Angles for Gellman149.

| Atom | Atom | Atom | Angle/°    | Atom | Atom | Atom | Angle/°    |
|------|------|------|------------|------|------|------|------------|
| C8   | O1   | C7   | 114.17(14) | C23  | C24  | C25  | 111.92(14) |
| C43  | O8   | C44  | 120.82(16) | C26  | C25  | C24  | 111.49(15) |
| C13  | N1   | C9   | 121.94(15) | C27  | C25  | C24  | 109.91(14) |
| C23  | N2   | C22  | 124.05(15) | C27  | C25  | C26  | 110.67(15) |
| C28  | N3   | C24  | 118.97(14) | O5   | C28  | N3   | 121.60(16) |
| C38  | N4   | C37  | 120.99(15) | O5   | C28  | C29  | 120.82(15) |
| C43  | N5   | C39  | 120.71(16) | N3   | C28  | C29  | 117.52(15) |
| C2   | C1   | C6   | 120.1(2)   | C28  | C29  | C30  | 106.35(14) |
| C1   | C2   | C3   | 120.2(2)   | C28  | C29  | C32  | 109.79(13) |
| C4   | C3   | C2   | 120.2(2)   | C30  | C29  | C32  | 115.09(14) |
| C3   | C4   | C5   | 119.9(2)   | C31  | C30  | C29  | 111.62(15) |
| C6   | C5   | C4   | 120.2(2)   | C33  | C32  | C29  | 113.58(14) |
| C1   | C6   | C7   | 120.12(19) | C33  | C32  | C37  | 107.55(14) |
| C5   | C6   | C1   | 119.4(2)   | C37  | C32  | C29  | 111.20(13) |
| C5   | C6   | C7   | 120.5(2)   | C34  | C33  | C32  | 111.96(15) |
| O1   | C7   | C6   | 107.10(15) | C35  | C34  | C33  | 111.63(16) |
| O1   | C8   | C9   | 111.69(15) | C36  | C35  | C34  | 110.35(15) |
| O2   | C8   | O1   | 123.66(17) | C35  | C36  | C37  | 110.49(15) |
| O2   | C8   | C9   | 124.61(17) | N4   | C37  | C32  | 112.51(14) |
| N1   | C9   | C8   | 107.97(14) | N4   | C37  | C36  | 111.27(14) |



|     |     |     |            |     |     |     |            |
|-----|-----|-----|------------|-----|-----|-----|------------|
| N1  | C9  | C10 | 114.06(15) | C36 | C37 | C32 | 111.71(14) |
| C8  | C9  | C10 | 109.06(15) | O6  | C38 | N4  | 123.30(17) |
| C11 | C10 | C9  | 111.79(16) | O6  | C38 | C39 | 121.52(15) |
| C11 | C10 | C12 | 111.16(18) | N4  | C38 | C39 | 115.18(15) |
| C12 | C10 | C9  | 110.51(18) | N5  | C39 | C38 | 109.12(15) |
| O3  | C13 | N1  | 122.75(17) | N5  | C39 | C40 | 109.97(15) |
| O3  | C13 | C14 | 122.88(18) | C38 | C39 | C40 | 112.45(15) |
| N1  | C13 | C14 | 114.35(16) | C41 | C40 | C39 | 109.89(17) |
| C13 | C14 | C15 | 110.45(15) | C42 | C40 | C39 | 111.67(15) |
| C13 | C14 | C17 | 108.92(15) | C42 | C40 | C41 | 109.46(17) |
| C15 | C14 | C17 | 113.90(15) | O7  | C43 | O8  | 125.18(19) |
| C16 | C15 | C14 | 111.90(16) | O7  | C43 | N5  | 124.44(18) |
| C18 | C17 | C14 | 112.29(15) | N5  | C43 | O8  | 110.38(17) |
| C18 | C17 | C22 | 110.53(16) | O8  | C44 | C45 | 111.48(18) |
| C22 | C17 | C14 | 111.25(14) | O8  | C44 | C46 | 108.41(19) |
| C19 | C18 | C17 | 113.00(17) | O8  | C44 | C47 | 102.32(17) |
| C20 | C19 | C18 | 110.74(18) | C45 | C44 | C47 | 110.8(2)   |
| C19 | C20 | C21 | 111.10(19) | C46 | C44 | C45 | 112.6(2)   |
| C20 | C21 | C22 | 112.24(17) | C46 | C44 | C47 | 110.7(2)   |
| N2  | C22 | C17 | 111.86(14) | C48 | C49 | C50 | 113.6(3)   |
| N2  | C22 | C21 | 107.59(15) | C51 | C50 | C49 | 113.8(4)   |
| C21 | C22 | C17 | 111.26(16) | C50 | C51 | C52 | 114.2(5)   |
| O4  | C23 | N2  | 124.43(16) | C51 | C52 | C53 | 114.0(4)   |
| O4  | C23 | C24 | 120.98(15) | C54 | C53 | C52 | 111.8(3)   |
| N2  | C23 | C24 | 114.55(14) | C11 | C55 | C12 | 109.6(4)   |
| N3  | C24 | C23 | 109.46(13) | C11 | C55 | C13 | 109.9(4)   |
| N3  | C24 | C25 | 109.92(14) | C12 | C55 | C13 | 110.7(4)   |

**Table S46.** Hydrogen Bonds for Gellman149.

| D  | H  | A               | d(D-H)/Å | d(H-A)/Å | d(D-A)/Å   | D-H-A/° |
|----|----|-----------------|----------|----------|------------|---------|
| N1 | H1 | O5              | 0.87(2)  | 2.26(2)  | 3.1061(19) | 164(2)  |
| N2 | H2 | O6 <sup>1</sup> | 0.85(2)  | 2.13(3)  | 2.972(2)   | 170(2)  |
| N3 | H3 | O7              | 0.87(3)  | 2.17(3)  | 3.021(2)   | 168(2)  |
| N4 | H4 | O4              | 0.82(3)  | 2.35(3)  | 3.151(2)   | 163(2)  |
| N5 | H5 | O2 <sup>2</sup> | 0.79(3)  | 2.26(3)  | 2.960(2)   | 148(2)  |

<sup>1</sup>1-X,1/2+Y,1/2-Z; <sup>2</sup>1-X,-1/2+Y,1/2-Z

**Table S47.** Torsion Angles for Gellman149.

| A  | B   | C   | D   | Angle/°    | A   | B   | C   | D   | Angle/°     |
|----|-----|-----|-----|------------|-----|-----|-----|-----|-------------|
| O1 | C8  | C9  | N1  | 164.93(15) | C17 | C18 | C19 | C20 | 55.6(2)     |
| O1 | C8  | C9  | C10 | -70.63(19) | C18 | C17 | C22 | N2  | 172.87(14)  |
| O2 | C8  | C9  | N1  | -17.6(3)   | C18 | C17 | C22 | C21 | 52.5(2)     |
| O2 | C8  | C9  | C10 | 106.8(2)   | C18 | C19 | C20 | C21 | -55.6(2)    |
| O3 | C13 | C14 | C15 | -51.4(2)   | C19 | C20 | C21 | C22 | 56.1(2)     |
| O3 | C13 | C14 | C17 | 74.4(2)    | C20 | C21 | C22 | N2  | -177.42(17) |

|     |     |     |     |             |     |     |     |     |             |
|-----|-----|-----|-----|-------------|-----|-----|-----|-----|-------------|
| O4  | C23 | C24 | N3  | -43.5(2)    | C20 | C21 | C22 | C17 | -54.6(2)    |
| O4  | C23 | C24 | C25 | 78.62(19)   | C22 | N2  | C23 | O4  | -4.6(3)     |
| O5  | C28 | C29 | C30 | -64.75(19)  | C22 | N2  | C23 | C24 | 173.22(15)  |
| O5  | C28 | C29 | C32 | 60.4(2)     | C22 | C17 | C18 | C19 | -53.9(2)    |
| O6  | C38 | C39 | N5  | -42.0(2)    | C23 | N2  | C22 | C17 | 99.32(19)   |
| O6  | C38 | C39 | C40 | 80.3(2)     | C23 | N2  | C22 | C21 | -138.20(17) |
| N1  | C9  | C10 | C11 | 61.7(2)     | C23 | C24 | C25 | C26 | 48.42(19)   |
| N1  | C9  | C10 | C12 | -62.7(2)    | C23 | C24 | C25 | C27 | 171.51(14)  |
| N1  | C13 | C14 | C15 | 129.96(17)  | C24 | N3  | C28 | O5  | -4.9(2)     |
| N1  | C13 | C14 | C17 | -104.25(18) | C24 | N3  | C28 | C29 | 177.63(14)  |
| N2  | C23 | C24 | N3  | 138.56(14)  | C28 | N3  | C24 | C23 | -55.42(19)  |
| N2  | C23 | C24 | C25 | -99.32(17)  | C28 | N3  | C24 | C25 | -178.72(14) |
| N3  | C24 | C25 | C26 | 170.26(15)  | C28 | C29 | C30 | C31 | -62.36(19)  |
| N3  | C24 | C25 | C27 | -66.64(18)  | C28 | C29 | C32 | C33 | -147.52(15) |
| N3  | C28 | C29 | C30 | 112.74(16)  | C28 | C29 | C32 | C37 | 91.00(16)   |
| N3  | C28 | C29 | C32 | -122.15(16) | C29 | C32 | C33 | C34 | 179.67(15)  |
| N4  | C38 | C39 | N5  | 137.57(16)  | C29 | C32 | C37 | N4  | -50.62(19)  |
| N4  | C38 | C39 | C40 | -100.13(18) | C29 | C32 | C37 | C36 | -176.61(14) |
| N5  | C39 | C40 | C41 | -64.9(2)    | C30 | C29 | C32 | C33 | -27.6(2)    |
| N5  | C39 | C40 | C42 | 173.39(16)  | C30 | C29 | C32 | C37 | -149.08(15) |
| C1  | C2  | C3  | C4  | -0.5(4)     | C32 | C29 | C30 | C31 | 175.84(16)  |
| C1  | C6  | C7  | O1  | 70.1(2)     | C32 | C33 | C34 | C35 | 56.7(2)     |
| C2  | C1  | C6  | C5  | 1.1(3)      | C33 | C32 | C37 | N4  | -175.56(14) |
| C2  | C1  | C6  | C7  | -177.85(19) | C33 | C32 | C37 | C36 | 58.45(18)   |
| C2  | C3  | C4  | C5  | 1.2(4)      | C33 | C34 | C35 | C36 | -55.0(2)    |
| C3  | C4  | C5  | C6  | -0.8(3)     | C34 | C35 | C36 | C37 | 56.0(2)     |
| C4  | C5  | C6  | C1  | -0.3(3)     | C35 | C36 | C37 | N4  | 173.93(15)  |
| C4  | C5  | C6  | C7  | 178.61(19)  | C35 | C36 | C37 | C32 | -59.41(19)  |
| C5  | C6  | C7  | O1  | -108.8(2)   | C37 | N4  | C38 | O6  | 2.0(3)      |
| C6  | C1  | C2  | C3  | -0.7(3)     | C37 | N4  | C38 | C39 | -177.57(15) |
| C7  | O1  | C8  | O2  | -2.6(3)     | C37 | C32 | C33 | C34 | -56.84(19)  |
| C7  | O1  | C8  | C9  | 174.86(15)  | C38 | N4  | C37 | C32 | 149.49(15)  |
| C8  | O1  | C7  | C6  | -177.41(16) | C38 | N4  | C37 | C36 | -84.28(19)  |
| C8  | C9  | C10 | C11 | -59.1(2)    | C38 | C39 | C40 | C41 | 173.24(16)  |
| C8  | C9  | C10 | C12 | 176.53(16)  | C38 | C39 | C40 | C42 | 51.6(2)     |
| C9  | N1  | C13 | O3  | -9.5(3)     | C39 | N5  | C43 | O7  | -9.2(3)     |
| C9  | N1  | C13 | C14 | 169.20(15)  | C39 | N5  | C43 | O8  | 170.71(17)  |
| C13 | N1  | C9  | C8  | -136.40(17) | C43 | O8  | C44 | C45 | 59.2(3)     |
| C13 | N1  | C9  | C10 | 102.2(2)    | C43 | O8  | C44 | C46 | -65.3(3)    |
| C13 | C14 | C15 | C16 | -69.5(2)    | C43 | O8  | C44 | C47 | 177.6(2)    |
| C13 | C14 | C17 | C18 | -79.11(19)  | C43 | N5  | C39 | C38 | -60.9(2)    |
| C13 | C14 | C17 | C22 | 156.42(15)  | C43 | N5  | C39 | C40 | 175.31(17)  |
| C14 | C17 | C18 | C19 | -178.76(17) | C44 | O8  | C43 | O7  | -11.6(3)    |
| C14 | C17 | C22 | N2  | -61.67(19)  | C44 | O8  | C43 | N5  | 168.43(18)  |
| C14 | C17 | C22 | C21 | 177.96(15)  | C48 | C49 | C50 | C51 | 173.0(4)    |
| C15 | C14 | C17 | C18 | 44.7(2)     | C49 | C50 | C51 | C52 | 61.6(7)     |
| C15 | C14 | C17 | C22 | -79.82(18)  | C50 | C51 | C52 | C53 | -175.1(5)   |
| C17 | C14 | C15 | C16 | 167.55(16)  | C51 | C52 | C53 | C54 | -177.6(5)   |

**Table S48.** Hydrogen Atom Coordinates ( $\text{\AA}\times 10^4$ ) and Isotropic Displacement Parameters ( $\text{\AA}^2\times 10^3$ ) for Gellman149.

| Atom | <i>x</i> | <i>y</i> | <i>z</i> | U(eq) |
|------|----------|----------|----------|-------|
| H1   | 3250(20) | 7171(13) | 3866(9)  | 22(5) |
| H2   | 3362(19) | 7530(14) | 2336(8)  | 20(5) |
| H3   | 6170(20) | 5985(15) | 2622(10) | 31(6) |
| H4   | 4630(20) | 5025(14) | 3002(9)  | 24(6) |
| H5   | 5980(20) | 3789(16) | 1707(10) | 31(6) |
| H1A  | 4402     | 9309     | 5735     | 35    |
| H2A  | 3958     | 10140    | 6397     | 46    |
| H3A  | 3204     | 11335    | 6217     | 54    |
| H4A  | 2917     | 11709    | 5373     | 51    |
| H5A  | 3323     | 10867    | 4704     | 38    |
| H7A  | 4086     | 9718     | 4393     | 34    |
| H7B  | 4898     | 9246     | 4765     | 34    |
| H9   | 1876     | 7866     | 4545     | 24    |
| H10  | 2943     | 7579     | 5282     | 32    |
| H11A | 4667     | 7309     | 4919     | 52    |
| H11B | 4192     | 6547     | 4664     | 52    |
| H11C | 4305     | 6607     | 5273     | 52    |
| H12A | 2136     | 6207     | 4827     | 63    |
| H12B | 1377     | 6807     | 5129     | 63    |
| H12C | 2313     | 6336     | 5428     | 63    |
| H14  | 2630     | 6490     | 3237     | 24    |
| H15A | 486      | 5819     | 3404     | 28    |
| H15B | 1233     | 5600     | 2918     | 28    |
| H16A | 1900     | 5362     | 3956     | 47    |
| H16B | 2644     | 5142     | 3470     | 47    |
| H16C | 1502     | 4701     | 3576     | 47    |
| H17  | 1600     | 7653     | 3003     | 25    |
| H18A | -150     | 6594     | 2772     | 36    |
| H18B | -223     | 7258     | 3189     | 36    |
| H19A | -1168    | 7605     | 2424     | 46    |
| H19B | -182     | 8191     | 2548     | 46    |
| H20A | -97      | 7871     | 1678     | 45    |
| H20B | -66      | 6982     | 1814     | 45    |
| H21A | 1674     | 8050     | 2041     | 35    |
| H21B | 1753     | 7387     | 1622     | 35    |
| H22  | 1737     | 6446     | 2260     | 24    |
| H24  | 5121     | 7306     | 2425     | 18    |
| H25  | 5571     | 6028     | 1765     | 23    |
| H26A | 4555     | 7434     | 1465     | 43    |
| H26B | 4006     | 6607     | 1416     | 43    |
| H26C | 5044     | 6834     | 1063     | 43    |
| H27A | 7159     | 6729     | 2005     | 39    |
| H27B | 6605     | 7496     | 1793     | 39    |
| H27C | 6938     | 6829     | 1404     | 39    |
| H29  | 6713     | 5623     | 3412     | 19    |
| H30A | 6272     | 6863     | 4108     | 24    |
| H30B | 7239     | 6250     | 4201     | 24    |
| H31A | 8051     | 7322     | 3830     | 46    |

---

|      |       |      |      |    |
|------|-------|------|------|----|
| H31B | 7166  | 7314 | 3372 | 46 |
| H31C | 8085  | 6657 | 3411 | 46 |
| H32  | 4637  | 5615 | 3932 | 19 |
| H33A | 6554  | 5024 | 4461 | 25 |
| H33B | 5836  | 5738 | 4652 | 25 |
| H34A | 5322  | 4616 | 5107 | 32 |
| H34B | 4280  | 4950 | 4797 | 32 |
| H35A | 5608  | 3674 | 4482 | 31 |
| H35B | 4338  | 3629 | 4667 | 31 |
| H36A | 3747  | 4304 | 3936 | 25 |
| H36B | 4459  | 3581 | 3754 | 25 |
| H37  | 6058  | 4364 | 3669 | 21 |
| H39  | 4845  | 4866 | 2182 | 24 |
| H40  | 4246  | 3294 | 2026 | 28 |
| H41A | 4260  | 4012 | 1264 | 54 |
| H41B | 3459  | 4637 | 1516 | 54 |
| H41C | 3001  | 3798 | 1404 | 54 |
| H42A | 2838  | 4458 | 2441 | 42 |
| H42B | 3278  | 3733 | 2753 | 42 |
| H42C | 2419  | 3623 | 2291 | 42 |
| H45A | 9372  | 4319 | 2278 | 63 |
| H45B | 9032  | 5199 | 2239 | 63 |
| H45C | 10175 | 4909 | 1993 | 63 |
| H46A | 8124  | 5685 | 1465 | 66 |
| H46B | 8178  | 5207 | 944  | 66 |
| H46C | 9284  | 5583 | 1173 | 66 |
| H47A | 9044  | 3943 | 924  | 74 |
| H47B | 9541  | 3571 | 1434 | 74 |
| H47C | 10186 | 4255 | 1159 | 74 |
| H48A | 3411  | 4829 | 6224 | 66 |
| H48B | 3865  | 4017 | 6408 | 66 |
| H48C | 2590  | 4241 | 6501 | 66 |
| H49A | 2704  | 3420 | 5810 | 43 |
| H49B | 3593  | 3964 | 5538 | 43 |
| H50A | 1291  | 4320 | 5691 | 37 |
| H50B | 2163  | 4931 | 5479 | 37 |
| H51A | 2457  | 4181 | 4746 | 37 |
| H51B | 1181  | 4426 | 4795 | 37 |
| H52A | 701   | 3209 | 5091 | 46 |
| H52B | 1980  | 2958 | 5094 | 46 |
| H53A | 768   | 3305 | 4178 | 53 |
| H53B | 2033  | 3020 | 4189 | 53 |
| H54A | 1358  | 1851 | 4587 | 92 |
| H54B | 990   | 1956 | 4003 | 92 |
| H54C | 126   | 2133 | 4453 | 92 |
| H55  | 441   | 3780 | 4450 | 31 |

---

## Crystallographic Experimental Section for Compound 2b

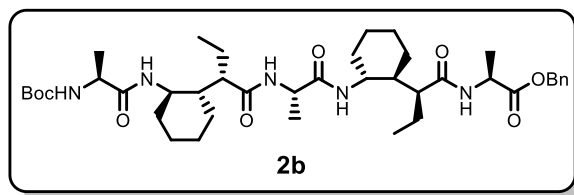

### Data Collection

A colorless crystal with approximate dimensions 0.28 x 0.24 x 0.11 mm<sup>3</sup> was selected under oil under ambient conditions and attached to the tip of a MiTeGen MicroMount<sup>®</sup>. The crystal was mounted in a stream of cold nitrogen at 100(1) K and centered in the X-ray beam by using a video camera.

The crystal evaluation and data collection were performed on a Bruker Venture MX diffractometer with Cu K<sub>α</sub> ( $\lambda = 1.54178 \text{ \AA}$ ) radiation and the diffractometer to crystal distance of 4.03 cm.

The initial cell constants were obtained from a series of  $\omega$  scans with the exposure time of 20 seconds per frame. The reflections were successfully indexed by an automated indexing routine built in the APEXII program. The final cell constants were calculated from a set of 9777 strong reflections from the actual data collection.

The data were collected by using the full sphere data collection routine to survey the reciprocal space to the extent of a full sphere to a resolution of 0.80  $\text{\AA}$ . A total of 45447 data were harvested by collecting 12 sets of frames with 0.2° scans in  $\omega$  and  $\phi$  with an exposure time 60 sec per frame. These highly redundant datasets were corrected for Lorentz and polarization effects. The absorption correction was based on fitting a function to the empirical transmission surface as sampled by multiple equivalent measurements. [1]

### Structure Solution and Refinement

The systematic absences in the diffraction data were consistent for the space groups  $P2_1$  and  $P2_1/m$ . The  $E$ -statistics strongly suggested the non-centrosymmetric space group  $P2_1$  that yielded chemically reasonable and computationally stable results of refinement [2-4].

A successful solution by the direct methods provided most non-hydrogen atoms from the  $E$ -map. The remaining non-hydrogen atoms were located in an alternating series of least-squares cycles and difference Fourier maps. All polypeptide non-hydrogen atoms were refined with anisotropic displacement coefficients. All hydrogen atoms were included in the structure factor calculation at idealized positions and were allowed to ride on the neighboring atoms with relative isotropic displacement coefficients.

There are two symmetry independent polypeptide molecules in the asymmetric unit. The molecular conformations differ slightly, most noticeably in the position of the tolyl group.

There are also four disordered solvent molecules in the unit cell: two heptanes and two ethanols. The heptanes are equally disordered over two positions each. Ethanol O9 is disordered over two positions (major component occupancy is 73.2(16)%), in ethanol O10 only the ethyl groups are disordered with the major component occupied 68.5(19)% of the time. In the solvents the O9/O9a molecules and atom O10 were refined anisotropically, all other atoms isotropically. Sixty three restraints and constraints were applied to the solvent molecules to ensure computationally stable and chemically reasonable refinement.

The proposed absolute configuration was confirmed experimentally by the Hooft  $y$  parameter (0.08(6)), but it was inconclusive according to the Flack  $x$  parameter (0.1(2)).

The final least-squares refinement of 1127 parameters against 20128 data resulted in residuals  $R$  (based on  $F^2$  for  $I \geq 2\sigma$ ) and  $wR$  (based on  $F^2$  for all data) of 0.0894 and 0.2606, respectively. The final difference Fourier map was featureless.

## Summary

**Crystal Data** for  $C_{50}H_{87}N_5O_9$  ( $M = 902.24$ ): monoclinic, space group  $P2_1$  (no. 4),  $a = 13.4361(18)$  Å,  $b = 18.178(3)$  Å,  $c = 22.458(3)$  Å,  $\beta = 100.534(9)^\circ$ ,  $V = 5392.7(13)$  Å<sup>3</sup>,  $Z = 4$ ,  $T = 100.15$  K,  $\mu(\text{CuK}\alpha) = 0.605$  mm<sup>-1</sup>,  $D_{\text{calc}} = 1.111$  g/mm<sup>3</sup>, 45447 reflections measured ( $6.298 \leq 2\theta \leq 149.016$ ), 20128 unique ( $R_{\text{int}} = 0.0386$ ,  $R_{\text{sigma}} = 0.0485$ ) which were used in all calculations. The final  $R_1$  was 0.0894 ( $I > 2\sigma(I)$ ) and  $wR_2$  was 0.2606 (all data).

## References

- [1] Bruker-AXS. (2007-2013) APEX2 (Ver. 2013.2-0), SADABS (2012-1), and SAINT+ (Ver. 8.30C) Software Reference Manuals. Bruker-AXS, Madison, Wisconsin, USA.
- [2] Sheldrick, G. M. (2008) SHELXL. *Acta Cryst.* **A64**, 112-122.
- [3] Dolomanov, O.V.; Bourhis, L.J.; Gildea, R.J.; Howard, J.A.K.; Puschmann, H. "OLEX2: a complete structure solution, refinement and analysis program". *J. Appl. Cryst.* (2009) **42**, 339-341.
- [4] Guzei, I.A. (2013). Internal laboratory computer programs Gn.

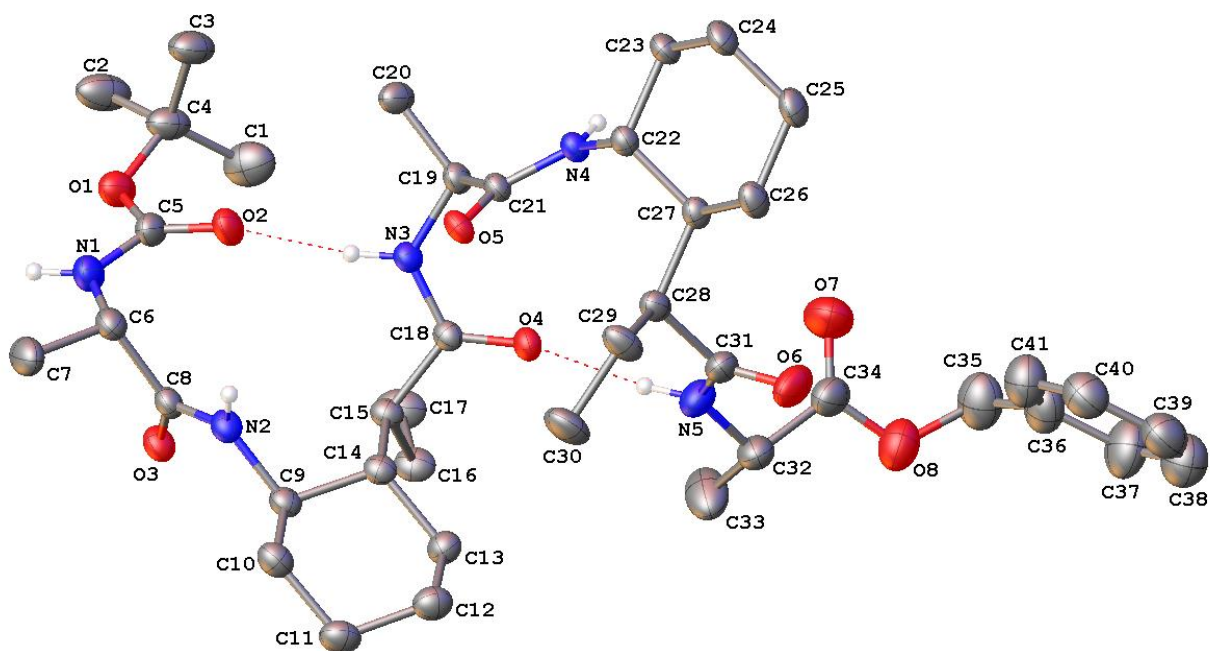

**Figure S29.** A molecular drawing of the O1 foldamer shown with 40% probability ellipsoids. All aliphatic and aromatic H atoms are omitted.

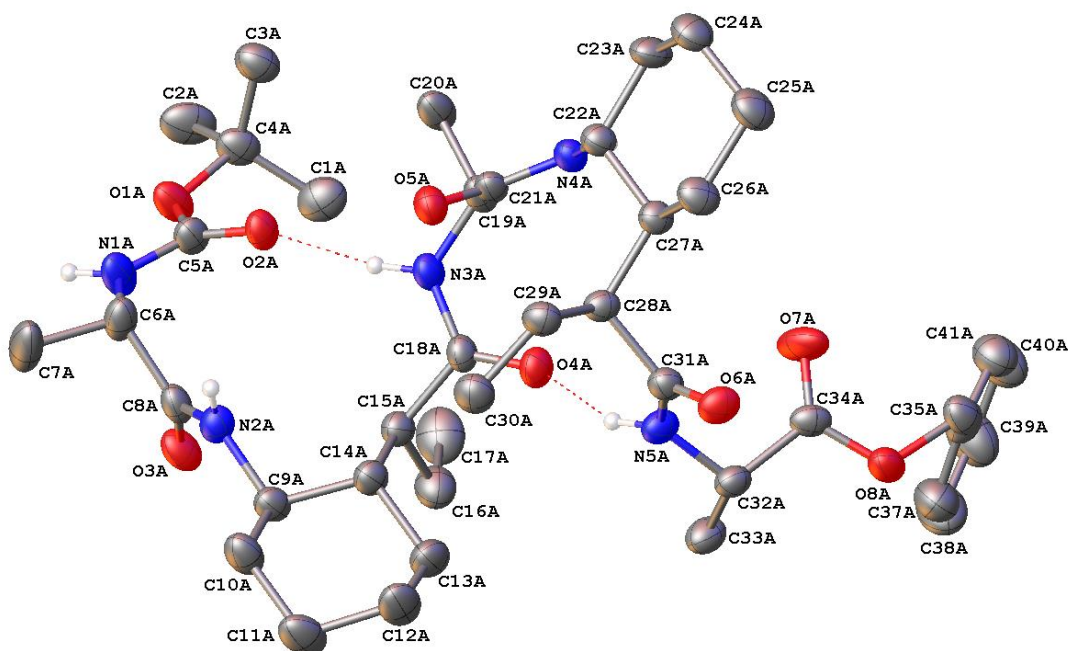

**Figure S30.** A molecular drawing of the O1a foldamer shown with 40% probability ellipsoids. All aliphatic and aromatic H atoms are omitted.

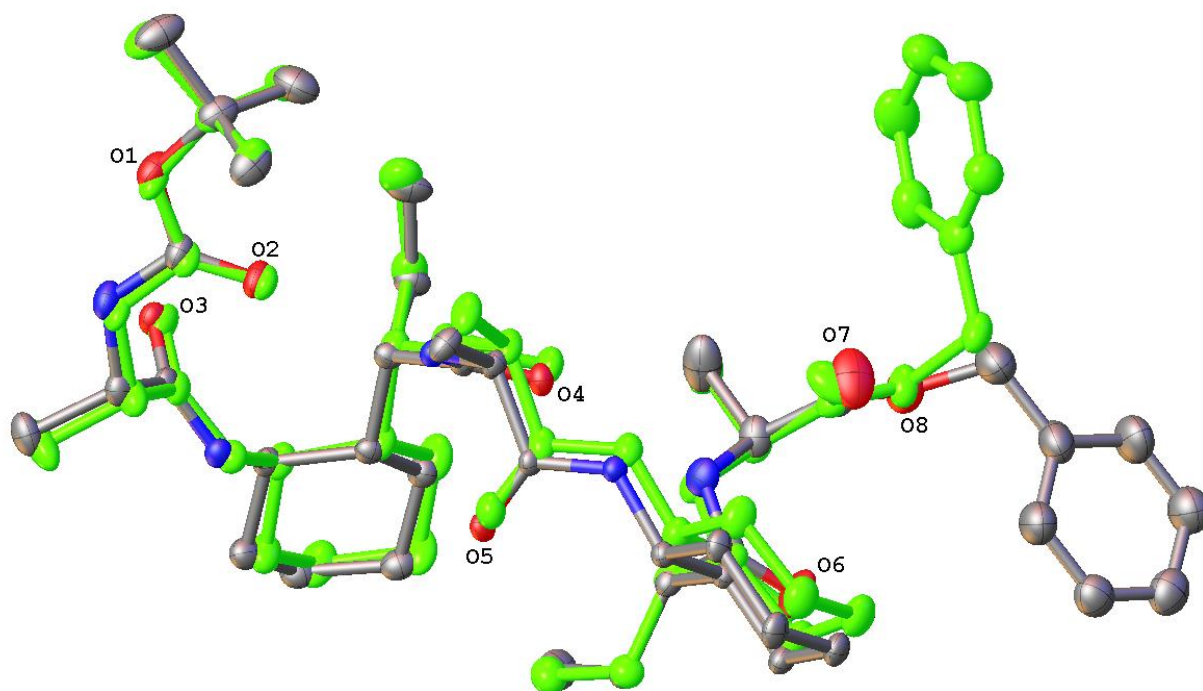

**Figure S31.** Superposition of the two polypeptides shown with 30% probability ellipsoids. All H atoms are omitted.



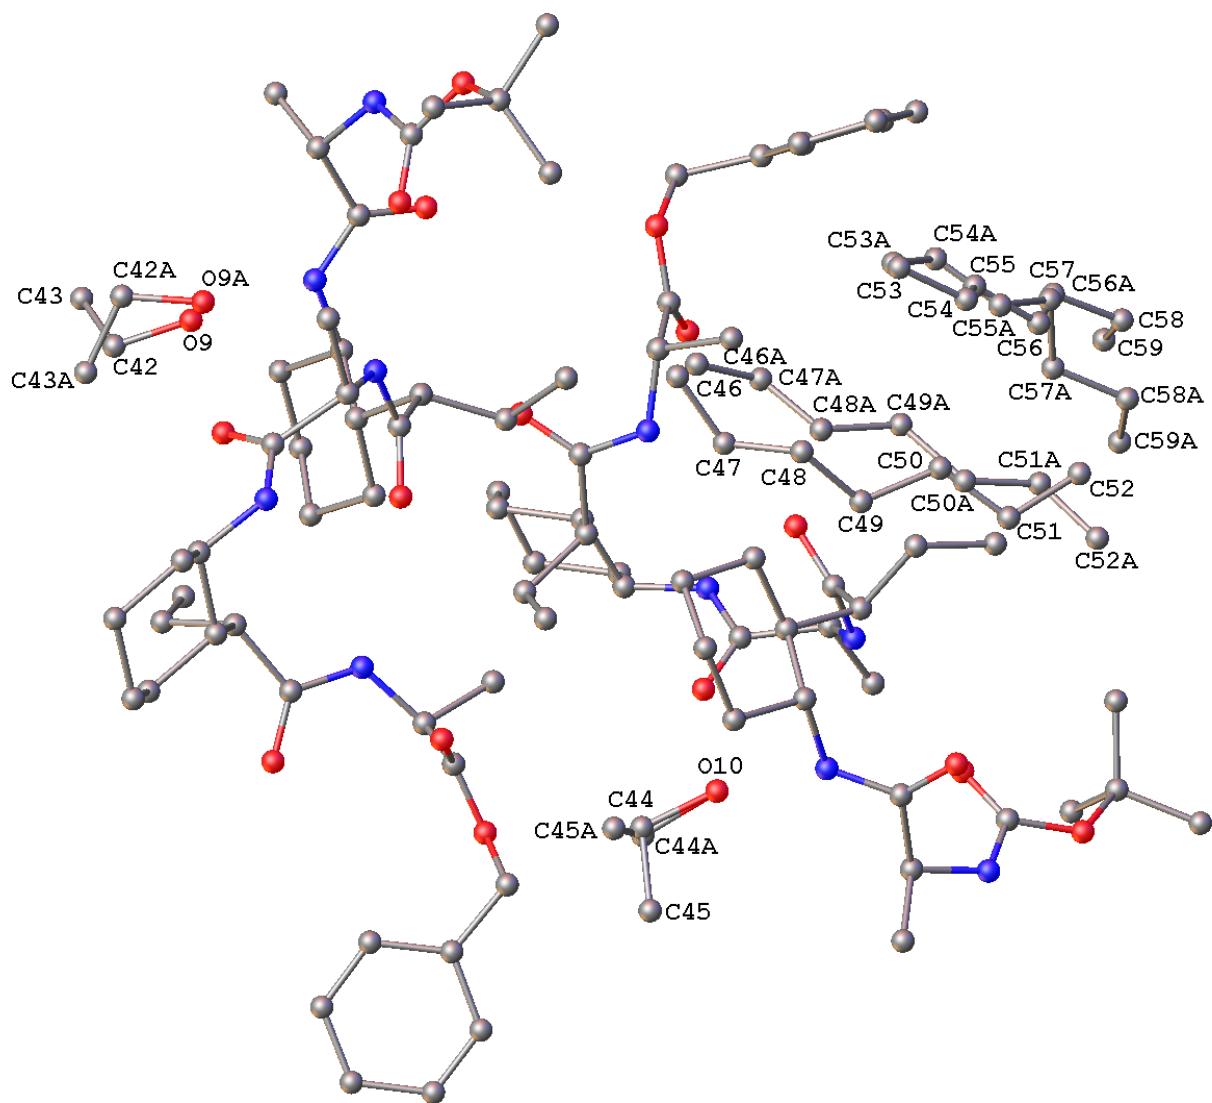

**Figure S32.** Content of the asymmetric unit. All H atoms are omitted, but all molecules with disordered atoms are shown. Only the solvent molecules are labeled.

**Table S49.** Crystal data and structure refinement for Gellman153.

|                                                   |                                                                                                       |
|---------------------------------------------------|-------------------------------------------------------------------------------------------------------|
| <b>Identification code</b>                        | Gellman153                                                                                            |
| <b>Empirical formula</b>                          | C <sub>41</sub> H <sub>65</sub> N <sub>5</sub> O <sub>8</sub> · C <sub>7</sub> H <sub>16</sub> · EtOH |
| <b>Formula weight</b>                             | 902.24                                                                                                |
| <b>Temperature/K</b>                              | 100.15                                                                                                |
| <b>Crystal system</b>                             | monoclinic                                                                                            |
| <b>Space group</b>                                | P2 <sub>1</sub>                                                                                       |
| <b>a/Å</b>                                        | 13.4361(18)                                                                                           |
| <b>b/Å</b>                                        | 18.178(3)                                                                                             |
| <b>c/Å</b>                                        | 22.458(3)                                                                                             |
| <b>α/°</b>                                        | 90                                                                                                    |
| <b>β/°</b>                                        | 100.534(9)                                                                                            |
| <b>γ/°</b>                                        | 90                                                                                                    |
| <b>Volume/Å<sup>3</sup></b>                       | 5392.7(13)                                                                                            |
| <b>Z</b>                                          | 4                                                                                                     |
| <b>ρ<sub>calc</sub>/mg/mm<sup>3</sup></b>         | 1.111                                                                                                 |
| <b>m/mm<sup>-1</sup></b>                          | 0.605                                                                                                 |
| <b>F(000)</b>                                     | 1976.0                                                                                                |
| <b>Crystal size/mm<sup>3</sup></b>                | 0.28 × 0.24 × 0.11                                                                                    |
| <b>Radiation</b>                                  | CuKα (λ = 1.54178)                                                                                    |
| <b>2θ range for data collection</b>               | 6.298 to 149.016°                                                                                     |
| <b>Index ranges</b>                               | -15 ≤ h ≤ 16, -22 ≤ k ≤ 19, -25 ≤ l ≤ 28                                                              |
| <b>Reflections collected</b>                      | 45447                                                                                                 |
| <b>Independent reflections</b>                    | 20128 [R <sub>int</sub> = 0.0386, R <sub>sigma</sub> = 0.0485]                                        |
| <b>Data/restraints/parameters</b>                 | 20128/64/1127                                                                                         |
| <b>Goodness-of-fit on F<sup>2</sup></b>           | 0.967                                                                                                 |
| <b>Final R indexes [I ≥ 2σ (I)]</b>               | R <sub>1</sub> = 0.0894, wR <sub>2</sub> = 0.2495                                                     |
| <b>Final R indexes [all data]</b>                 | R <sub>1</sub> = 0.0939, wR <sub>2</sub> = 0.2606                                                     |
| <b>Largest diff. peak/hole / e Å<sup>-3</sup></b> | 0.66/-0.51                                                                                            |
| <b>Flack parameter</b>                            | 0.1(2)                                                                                                |
| <b>Hooft parameter</b>                            | 0.08(6)                                                                                               |

**Table S50.** Fractional Atomic Coordinates (×10<sup>4</sup>) and Equivalent Isotropic Displacement Parameters (Å<sup>2</sup>×10<sup>3</sup>) for Gellman153. U<sub>eq</sub> is defined as 1/3 of the trace of the orthogonalised U<sub>ij</sub> tensor.

| <b>Atom</b> | <b>x</b> | <b>y</b>   | <b>z</b>   | <b>U(eq)</b> |
|-------------|----------|------------|------------|--------------|
| O1          | 7821(2)  | 1462(2)    | 6010.6(16) | 48.4(7)      |
| O2          | 6177(2)  | 1117.9(19) | 5673.7(16) | 46.0(7)      |
| O3          | 5630(2)  | 2760.4(17) | 4907.8(13) | 38.9(6)      |
| O4          | 3457(2)  | 23.6(16)   | 4115.6(12) | 35.3(5)      |
| O5          | 2759(2)  | -0.6(15)   | 5457.6(12) | 32.8(5)      |
| O6          | 68(3)    | -1120(3)   | 3435.3(18) | 66.1(11)     |
| O7          | 2010(6)  | -1980(3)   | 3026(3)    | 97.2(19)     |
| O8          | 1227(4)  | -1716(3)   | 2093(2)    | 75.4(12)     |
| N1          | 6578(3)  | 2255(2)    | 6053.3(19) | 46.5(8)      |
| N2          | 4111(2)  | 2419.5(19) | 5120.6(14) | 33.6(6)      |

|     |          |             |             |          |
|-----|----------|-------------|-------------|----------|
| N3  | 4519(2)  | 259.9(18)   | 4993.9(14)  | 29.8(6)  |
| N4  | 2896(2)  | -1214.8(17) | 5242.5(13)  | 28.1(6)  |
| N5  | 1580(3)  | -611(3)     | 3416.1(17)  | 48.6(9)  |
| C1  | 7989(5)  | 403(4)      | 5355(3)     | 68.1(15) |
| C2  | 9371(4)  | 858(4)      | 6189(3)     | 69.4(17) |
| C3  | 7842(4)  | 234(4)      | 6454(3)     | 60.4(13) |
| C4  | 8236(4)  | 719(3)      | 5988(2)     | 51.0(11) |
| C5  | 6806(3)  | 1574(3)     | 5895.7(19)  | 40.1(8)  |
| C6  | 5532(3)  | 2500(2)     | 5951.0(18)  | 38.3(8)  |
| C7  | 5463(5)  | 3251(3)     | 6254(2)     | 53.5(11) |
| C8  | 5102(3)  | 2561(2)     | 5274.2(17)  | 32.5(7)  |
| C9  | 3541(3)  | 2475(2)     | 4498.7(16)  | 32.6(7)  |
| C10 | 2619(3)  | 2965(2)     | 4498(2)     | 41.2(8)  |
| C11 | 1938(3)  | 3004(3)     | 3872(2)     | 45.8(9)  |
| C12 | 1613(3)  | 2238(3)     | 3653(2)     | 43.2(9)  |
| C13 | 2532(3)  | 1748(2)     | 3634.8(17)  | 37.6(8)  |
| C14 | 3247(3)  | 1700(2)     | 4253.6(15)  | 31.2(7)  |
| C15 | 4216(3)  | 1235(2)     | 4248.8(16)  | 31.0(7)  |
| C16 | 4613(3)  | 1248(3)     | 3646.4(18)  | 40.9(8)  |
| C17 | 5673(4)  | 924(4)      | 3726(3)     | 57.2(13) |
| C18 | 4035(3)  | 450(2)      | 4437.8(15)  | 29.1(6)  |
| C19 | 4364(3)  | -454(2)     | 5249.4(16)  | 31.3(7)  |
| C20 | 5050(3)  | -537(3)     | 5870.1(19)  | 41.7(9)  |
| C21 | 3256(2)  | -532.4(19)  | 5321.3(14)  | 27.1(6)  |
| C22 | 1889(3)  | -1453(2)    | 5321.9(16)  | 29.1(6)  |
| C23 | 1989(3)  | -2209(2)    | 5627.3(17)  | 35.4(7)  |
| C24 | 958(3)   | -2515(2)    | 5700(2)     | 42.2(9)  |
| C25 | 254(3)   | -2558(2)    | 5091(2)     | 42.2(9)  |
| C26 | 135(3)   | -1802(2)    | 4787(2)     | 38.7(8)  |
| C27 | 1158(3)  | -1484(2)    | 4706.2(16)  | 30.0(7)  |
| C28 | 1078(3)  | -721(2)     | 4390.9(17)  | 35.4(7)  |
| C29 | 317(3)   | -200(2)     | 4593(2)     | 46.5(10) |
| C30 | 421(5)   | 585(3)      | 4365(3)     | 61.6(13) |
| C31 | 853(4)   | -837(3)     | 3706.0(19)  | 43.8(9)  |
| C32 | 1511(4)  | -728(3)     | 2769(2)     | 51.4(10) |
| C33 | 2325(8)  | -296(5)     | 2535(3)     | 85(2)    |
| C34 | 1646(4)  | -1547(3)    | 2646(3)     | 58.3(13) |
| C35 | 1167(6)  | -2491(5)    | 1915(4)     | 83(2)    |
| C36 | 117(5)   | -2751(4)    | 1852(3)     | 72.3(16) |
| C37 | -380(7)  | -3039(6)    | 1286(4)     | 90(2)    |
| C38 | -1342(7) | -3243(6)    | 1196(4)     | 84(2)    |
| C39 | -1916(6) | -3156(4)    | 1647(4)     | 76.2(17) |
| C40 | -1457(6) | -2877(4)    | 2196(3)     | 70.5(15) |
| C41 | -462(6)  | -2676(5)    | 2303(3)     | 74.0(17) |
| O1A | 4871(3)  | 866(2)      | -1905.9(14) | 53.2(9)  |
| O2A | 4405(3)  | 1258.9(19)  | -1034.6(13) | 44.8(7)  |
| O3A | 5155(3)  | -441(2)     | -337.9(16)  | 54.4(8)  |
| O4A | 5333(3)  | 2222(2)     | 1095.7(14)  | 46.3(7)  |
| O5A | 2748(3)  | 2437.6(19)  | 410.3(14)   | 46.2(7)  |
| O6A | 3982(3)  | 3145(2)     | 2912.7(13)  | 48.2(7)  |
| O7A | 5824(3)  | 4012(3)     | 2290(2)     | 70.3(12) |

|      |          |         |             |          |
|------|----------|---------|-------------|----------|
| O8A  | 6781(3)  | 3874(2) | 3196.4(14)  | 51.4(8)  |
| N1A  | 4014(4)  | 127(2)  | -1414.0(16) | 56.1(11) |
| N2A  | 3931(3)  | -82(2)  | 167.5(16)   | 42.8(8)  |
| N3A  | 4642(3)  | 2072(2) | 110.9(15)   | 40.2(7)  |
| N4A  | 3388(3)  | 3584(2) | 641.6(14)   | 39.1(7)  |
| N5A  | 5007(3)  | 2665(2) | 2323.8(15)  | 43.1(8)  |
| C1A  | 6147(5)  | 1811(4) | -1555(3)    | 64.3(14) |
| C2A  | 5676(6)  | 1387(4) | -2642(3)    | 70.4(17) |
| C3A  | 4460(5)  | 2144(3) | -2180(3)    | 58.2(12) |
| C4A  | 5297(4)  | 1573(3) | -2057(2)    | 51.3(11) |
| C5A  | 4435(4)  | 788(3)  | -1412.8(18) | 45.3(9)  |
| C6A  | 3520(5)  | -109(3) | -922.5(19)  | 53.8(12) |
| C7A  | 2997(7)  | -850(4) | -1084(3)    | 81(2)    |
| C8A  | 4294(4)  | -223(2) | -335.0(19)  | 43.1(9)  |
| C9A  | 4547(4)  | -176(3) | 778.0(18)   | 44.6(9)  |
| C10A | 3960(5)  | -624(3) | 1166(2)     | 56.4(12) |
| C11A | 4540(7)  | -700(4) | 1815(2)     | 69.7(17) |
| C12A | 4753(6)  | 70(4)   | 2093(2)     | 68.0(16) |
| C13A | 5382(5)  | 510(3)  | 1720(2)     | 60.0(13) |
| C14A | 4839(4)  | 586(3)  | 1058.0(17)  | 42.6(9)  |
| C15A | 5462(3)  | 1025(3) | 654.3(18)   | 41.1(8)  |
| C16A | 6611(4)  | 942(4)  | 815(3)      | 59.3(12) |
| C17A | 7129(5)  | 1250(5) | 310(4)      | 76.6(18) |
| C18A | 5147(3)  | 1833(2) | 647.3(18)   | 38.6(8)  |
| C19A | 4266(4)  | 2817(2) | 42.2(17)    | 43.5(9)  |
| C20A | 3911(5)  | 3000(3) | -625(2)     | 56.1(12) |
| C21A | 3393(3)  | 2918(2) | 390.9(16)   | 39.1(8)  |
| C22A | 2634(3)  | 3840(2) | 987.8(17)   | 38.4(8)  |
| C23A | 2401(4)  | 4644(3) | 804(2)      | 52.4(11) |
| C24A | 1692(5)  | 5008(3) | 1181(3)     | 56.6(12) |
| C25A | 2180(5)  | 4965(3) | 1848(3)     | 59.2(13) |
| C26A | 2352(4)  | 4156(3) | 2042(2)     | 50.5(10) |
| C27A | 3056(3)  | 3777(2) | 1669.8(17)  | 38.6(8)  |
| C28A | 3282(3)  | 2955(2) | 1852.2(16)  | 38.0(8)  |
| C29A | 2357(3)  | 2509(3) | 1946.7(19)  | 44.5(9)  |
| C30A | 2583(5)  | 1681(3) | 1965(2)     | 54.5(11) |
| C31A | 4107(3)  | 2931(2) | 2418.4(18)  | 39.6(8)  |
| C32A | 5909(3)  | 2823(3) | 2756.4(17)  | 41.0(8)  |
| C33A | 6792(4)  | 2364(3) | 2618(2)     | 52.8(11) |
| C34A | 6149(3)  | 3642(3) | 2713.1(18)  | 42.1(9)  |
| C35A | 7171(5)  | 4619(3) | 3157(2)     | 53.2(11) |
| C36A | 8063(4)  | 4594(3) | 2863(2)     | 55.6(12) |
| C37A | 8749(6)  | 3999(4) | 2966(4)     | 74.3(17) |
| C38A | 9600(6)  | 3985(5) | 2724(5)     | 88(2)    |
| C39A | 9767(7)  | 4572(5) | 2361(5)     | 90(2)    |
| C40A | 9158(6)  | 5159(4) | 2269(5)     | 81(2)    |
| C41A | 8291(5)  | 5155(4) | 2523(3)     | 63.1(13) |
| O9   | 3127(5)  | 1406(3) | 5857(2)     | 36.9(12) |
| C42  | 2184(6)  | 1526(4) | 6037(3)     | 56(2)    |
| C43  | 2124(6)  | 2295(4) | 6236(3)     | 54.8(19) |
| O9A  | 3444(11) | 1358(6) | 5938(5)     | 30(3)    |

|      |          |           |          |          |
|------|----------|-----------|----------|----------|
| C42A | 2774(11) | 1547(10)  | 6326(7)  | 44(5)    |
| C43A | 1711(13) | 1477(17)  | 6029(12) | 74(7)    |
| O10  | 2359(3)  | 993(2)    | 193(2)   | 63.7(10) |
| C44A | 1345(18) | 1010(20)  | 310(20)  | 98(2)    |
| C45A | 1220(20) | 384(15)   | 701(14)  | 98(2)    |
| C44  | 1369(10) | 940(10)   | 340(11)  | 98(2)    |
| C45  | 816(11)  | 352(9)    | -34(7)   | 98(2)    |
| C46  | 7270(30) | -836(18)  | 3827(12) | 148(2)   |
| C47  | 6930(20) | -970(20)  | 3166(12) | 148(2)   |
| C48  | 7600(20) | -1030(20) | 2778(10) | 148(2)   |
| C49  | 7490(20) | -1020(20) | 2088(10) | 148(2)   |
| C50  | 8390(30) | -760(30)  | 1831(13) | 148(2)   |
| C51  | 8360(20) | -960(20)  | 1198(13) | 148(2)   |
| C52  | 9340(20) | -580(20)  | 1045(16) | 148(2)   |
| C46A | 7480(30) | -560(30)  | 3670(18) | 148(2)   |
| C47A | 7730(30) | -260(20)  | 3094(16) | 148(2)   |
| C48A | 7780(30) | -700(20)  | 2655(17) | 148(2)   |
| C49A | 8360(30) | -340(20)  | 2197(18) | 148(2)   |
| C50A | 8410(40) | -820(30)  | 1677(19) | 148(2)   |
| C51A | 8860(30) | -590(30)  | 1180(18) | 148(2)   |
| C52A | 9020(30) | -1110(20) | 659(17)  | 148(2)   |
| C53  | 9380(30) | 1160(20)  | 2711(13) | 148(2)   |
| C54  | 9560(30) | 1291(14)  | 2086(13) | 148(2)   |
| C55  | 9490(30) | 1976(14)  | 1826(12) | 148(2)   |
| C56  | 9440(30) | 2214(16)  | 1168(11) | 148(2)   |
| C57  | 9530(30) | 3022(15)  | 1040(11) | 148(2)   |
| C58  | 9680(20) | 3185(19)  | 424(13)  | 148(2)   |
| C59  | 8580(20) | 3130(20)  | 45(13)   | 148(2)   |
| C53A | 9270(30) | 1530(20)  | 2571(14) | 148(2)   |
| C54A | 9380(30) | 2173(17)  | 2181(11) | 148(2)   |
| C55A | 9360(30) | 2102(15)  | 1572(10) | 148(2)   |
| C56A | 9650(20) | 2630(20)  | 1100(12) | 148(2)   |
| C57A | 8830(20) | 2840(20)  | 578(11)  | 148(2)   |
| C58A | 9110(30) | 2760(20)  | -15(12)  | 148(2)   |
| C59A | 8390(30) | 3306(14)  | -423(11) | 148(2)   |

**Table S51.** Anisotropic Displacement Parameters ( $\text{\AA}^2 \times 10^3$ ) for Gellman153. The Anisotropic displacement factor exponent takes the form:  $-2\pi^2[h^2a^*^2U_{11}+2hka^*b^*U_{12}+\dots]$ .

| Atom | $U_{11}$ | $U_{22}$ | $U_{33}$ | $U_{23}$ | $U_{13}$  | $U_{12}$  |
|------|----------|----------|----------|----------|-----------|-----------|
| O1   | 37.7(15) | 44.1(18) | 59.4(18) | 8.6(14)  | -1.6(13)  | -8.3(12)  |
| O2   | 41.2(15) | 32.4(15) | 60.4(18) | -0.3(13) | -1.1(12)  | -8.6(11)  |
| O3   | 43.1(14) | 31.9(14) | 42.9(13) | 0.0(11)  | 10.7(11)  | -8.2(11)  |
| O4   | 41.0(13) | 28.3(13) | 35.4(12) | -4.1(10) | 4.1(10)   | -4.4(10)  |
| O5   | 37.6(12) | 21.4(12) | 41.2(12) | -0.9(10) | 11.9(10)  | -2.5(9)   |
| O6   | 54(2)    | 77(3)    | 56.7(19) | 9.3(19)  | -15.5(16) | -23.1(19) |
| O7   | 123(5)   | 63(3)    | 91(4)    | 9(3)     | -17(3)    | 14(3)     |
| O8   | 76(3)    | 82(3)    | 65(2)    | -13(2)   | 4(2)      | -15(2)    |
| N1   | 46.0(19) | 37(2)    | 52.0(19) | 0.2(15)  | -3.3(15)  | -10.4(14) |

|     |          |          |          |          |          |           |
|-----|----------|----------|----------|----------|----------|-----------|
| N2  | 37.2(15) | 32.1(16) | 33.5(14) | -0.3(12) | 11.3(11) | -5.4(12)  |
| N3  | 30.7(13) | 26.8(15) | 32.4(13) | 0.5(11)  | 6.6(10)  | -3.9(10)  |
| N4  | 26.8(13) | 22.9(14) | 34.8(13) | 0.5(10)  | 5.8(10)  | -1.2(10)  |
| N5  | 51(2)    | 54(2)    | 36.6(17) | 0.0(15)  | -1.6(14) | -6.4(17)  |
| C1  | 72(4)    | 71(4)    | 64(3)    | 1(3)     | 20(3)    | 20(3)     |
| C2  | 43(3)    | 74(4)    | 89(4)    | 36(3)    | 7(3)     | 2(2)      |
| C3  | 55(3)    | 57(3)    | 65(3)    | 25(2)    | 0(2)     | -4(2)     |
| C4  | 44(2)    | 52(3)    | 56(2)    | 19(2)    | 5.1(18)  | 2.4(19)   |
| C5  | 38.3(19) | 36(2)    | 42.7(18) | 4.1(15)  | -1.3(15) | -8.0(15)  |
| C6  | 46(2)    | 30.9(19) | 37.8(17) | 1.2(14)  | 6.4(15)  | -6.6(15)  |
| C7  | 79(3)    | 40(2)    | 40(2)    | -7.7(17) | 7(2)     | -1(2)     |
| C8  | 37.9(17) | 22.2(16) | 37.6(16) | 0.4(12)  | 7.5(13)  | -4.6(12)  |
| C9  | 35.3(17) | 27.6(18) | 35.9(16) | 4.3(13)  | 9.2(13)  | -2.9(13)  |
| C10 | 42(2)    | 33(2)    | 50(2)    | 2.0(16)  | 11.3(16) | 1.2(15)   |
| C11 | 42(2)    | 43(2)    | 52(2)    | 10.1(18) | 6.6(17)  | 7.6(16)   |
| C12 | 37.3(19) | 47(2)    | 44.4(19) | 8.2(17)  | 5.9(15)  | 3.1(16)   |
| C13 | 38.2(18) | 39(2)    | 34.6(16) | 0.0(14)  | 4.0(14)  | 0.0(15)   |
| C14 | 33.5(16) | 31.5(18) | 30.6(15) | 4.0(13)  | 10.9(12) | 0.3(13)   |
| C15 | 32.8(16) | 30.1(18) | 31.5(15) | 3.1(12)  | 9.8(12)  | 1.2(13)   |
| C16 | 45(2)    | 45(2)    | 37.2(18) | 7.0(16)  | 19.4(15) | 4.4(16)   |
| C17 | 54(3)    | 69(3)    | 56(3)    | 11(2)    | 30(2)    | 14(2)     |
| C18 | 32.7(16) | 26.3(17) | 29.8(15) | -1.1(12) | 9.7(12)  | 0.2(12)   |
| C19 | 28.9(16) | 27.5(18) | 37.1(16) | 1.5(13)  | 4.6(13)  | -5.5(12)  |
| C20 | 34.1(18) | 42(2)    | 45(2)    | 12.2(16) | -1.5(15) | -8.7(15)  |
| C21 | 30.2(15) | 20.5(16) | 30.8(14) | 1.0(11)  | 6.0(12)  | -3.1(11)  |
| C22 | 29.2(15) | 24.9(17) | 32.8(15) | -0.8(12) | 5.0(12)  | -0.6(12)  |
| C23 | 40.9(18) | 24.1(17) | 40.0(17) | 4.0(13)  | 4.1(14)  | -5.5(13)  |
| C24 | 50(2)    | 29.7(19) | 47(2)    | 2.9(15)  | 9.3(17)  | -13.4(16) |
| C25 | 39.9(19) | 32(2)    | 55(2)    | -4.5(17) | 8.7(16)  | -12.0(15) |
| C26 | 29.6(17) | 30.9(19) | 55(2)    | -1.9(16) | 6.0(14)  | -5.0(13)  |
| C27 | 27.1(15) | 26.4(17) | 36.3(16) | -1.8(12) | 5.4(12)  | -1.4(12)  |
| C28 | 31.3(16) | 31.8(19) | 40.4(18) | 2.6(14)  | -0.5(13) | -2.2(13)  |
| C29 | 37.5(19) | 31(2)    | 72(3)    | 8.5(19)  | 11.5(18) | 5.9(15)   |
| C30 | 65(3)    | 31(2)    | 88(4)    | 15(2)    | 12(3)    | 9(2)      |
| C31 | 47(2)    | 38(2)    | 40.4(19) | 3.0(15)  | -8.1(16) | -1.9(16)  |
| C32 | 64(3)    | 45(3)    | 41(2)    | 3.4(18)  | -0.5(18) | -4(2)     |
| C33 | 132(7)   | 75(5)    | 51(3)    | -4(3)    | 27(3)    | -37(5)    |
| C34 | 53(3)    | 58(3)    | 58(3)    | 7(2)     | -6(2)    | -11(2)    |
| C35 | 76(4)    | 80(5)    | 94(5)    | -25(4)   | 17(3)    | 1(3)      |
| C36 | 70(4)    | 64(4)    | 79(4)    | -21(3)   | 6(3)     | 4(3)      |
| C37 | 97(5)    | 100(6)   | 71(4)    | -30(4)   | 13(4)    | -13(5)    |
| C38 | 84(5)    | 85(5)    | 81(4)    | -12(4)   | 11(4)    | -4(4)     |
| C39 | 80(4)    | 60(4)    | 85(4)    | 10(3)    | 5(3)     | -8(3)     |
| C40 | 77(4)    | 62(4)    | 75(4)    | 2(3)     | 20(3)    | -2(3)     |
| C41 | 72(4)    | 72(4)    | 77(4)    | -17(3)   | 12(3)    | -7(3)     |
| O1A | 93(3)    | 37.6(17) | 34.8(14) | -1.3(12) | 27.2(16) | 5.6(16)   |
| O2A | 66.3(19) | 37.3(16) | 33.5(13) | -7.8(11) | 16.4(12) | -3.3(13)  |
| O3A | 79(2)    | 40.0(18) | 49.2(17) | -4.5(13) | 26.2(16) | 8.3(15)   |
| O4A | 59.8(18) | 43.2(17) | 36.1(14) | -9.2(12) | 9.5(12)  | -2.9(13)  |
| O5A | 54.5(17) | 37.8(16) | 45.5(14) | -5.3(12) | 7.4(12)  | -2.1(13)  |
| O6A | 59.0(18) | 56(2)    | 31.0(13) | 2.5(12)  | 11.8(12) | 5.2(14)   |

|      |          |          |          |          |          |           |
|------|----------|----------|----------|----------|----------|-----------|
| O7A  | 68(2)    | 67(3)    | 69(2)    | 38(2)    | -6.0(18) | -11.3(19) |
| O8A  | 80(2)    | 36.7(17) | 35.6(13) | 1.5(12)  | 6.0(14)  | 2.0(15)   |
| N1A  | 103(3)   | 39(2)    | 29.4(15) | -7.5(14) | 20.6(18) | -6(2)     |
| N2A  | 54.0(19) | 43(2)    | 32.3(15) | -1.4(13) | 9.8(14)  | -4.5(15)  |
| N3A  | 57(2)    | 33.4(18) | 31.7(14) | -5.7(12) | 10.6(13) | -1.3(14)  |
| N4A  | 52.5(19) | 32.9(17) | 32.1(14) | 1.2(12)  | 8.1(13)  | 0.0(14)   |
| N5A  | 52(2)    | 48(2)    | 28.3(13) | -2.8(13) | 5.0(13)  | 8.4(15)   |
| C1A  | 60(3)    | 77(4)    | 58(3)    | 11(3)    | 16(2)    | -5(3)     |
| C2A  | 98(4)    | 74(4)    | 47(3)    | 18(3)    | 34(3)    | 22(3)     |
| C3A  | 80(3)    | 45(3)    | 53(2)    | 7(2)     | 19(2)    | 7(2)      |
| C4A  | 69(3)    | 51(3)    | 38(2)    | 9.5(18)  | 20.4(19) | 6(2)      |
| C5A  | 68(3)    | 43(2)    | 26.6(16) | -1.8(15) | 10.8(17) | -1.8(19)  |
| C6A  | 79(3)    | 49(3)    | 32.5(19) | -3.1(17) | 8.9(19)  | -21(2)    |
| C7A  | 128(6)   | 62(4)    | 47(3)    | 2(2)     | -3(3)    | -49(4)    |
| C8A  | 65(3)    | 28.9(19) | 37.5(19) | -5.3(14) | 14.9(18) | -5.7(17)  |
| C9A  | 66(3)    | 38(2)    | 30.1(17) | -0.8(15) | 10.4(17) | 4.8(18)   |
| C10A | 89(4)    | 41(2)    | 43(2)    | 2.6(18)  | 22(2)    | -5(2)     |
| C11A | 120(5)   | 50(3)    | 42(2)    | 10(2)    | 24(3)    | 9(3)      |
| C12A | 117(5)   | 57(3)    | 29.2(19) | 4(2)     | 12(2)    | -6(3)     |
| C13A | 88(4)    | 53(3)    | 34(2)    | -0.2(19) | -2(2)    | 0(3)      |
| C14A | 59(2)    | 38(2)    | 30.8(17) | -2.4(15) | 7.6(16)  | 1.5(17)   |
| C15A | 50(2)    | 39(2)    | 33.7(16) | -4.6(15) | 5.8(15)  | 2.8(16)   |
| C16A | 52(3)    | 54(3)    | 69(3)    | -6(2)    | 5(2)     | 7(2)      |
| C17A | 56(3)    | 83(5)    | 94(5)    | -13(4)   | 25(3)    | -2(3)     |
| C18A | 47(2)    | 35(2)    | 35.3(17) | -6.8(15) | 9.7(15)  | -2.2(15)  |
| C19A | 70(3)    | 32(2)    | 30.3(17) | -0.6(14) | 15.8(17) | -5.0(18)  |
| C20A | 98(4)    | 40(2)    | 32.1(18) | 1.6(16)  | 17(2)    | 2(2)      |
| C21A | 58(2)    | 33(2)    | 25.9(14) | 3.4(13)  | 5.9(14)  | 0.3(16)   |
| C22A | 45(2)    | 35(2)    | 34.8(17) | 0.9(14)  | 6.7(14)  | 4.9(15)   |
| C23A | 67(3)    | 44(3)    | 44(2)    | 6.8(18)  | 3.7(19)  | 19(2)     |
| C24A | 66(3)    | 43(3)    | 59(3)    | 0(2)     | 8(2)     | 14(2)     |
| C25A | 79(3)    | 43(3)    | 58(3)    | -6(2)    | 18(2)    | 14(2)     |
| C26A | 63(3)    | 45(3)    | 46(2)    | 1.1(18)  | 18.7(19) | 15(2)     |
| C27A | 46(2)    | 38(2)    | 32.6(16) | -1.2(14) | 9.0(14)  | 5.3(15)   |
| C28A | 43.7(19) | 40(2)    | 30.8(15) | 2.8(14)  | 8.2(14)  | 6.5(15)   |
| C29A | 49(2)    | 44(2)    | 40.2(19) | 7.8(16)  | 9.1(16)  | 1.7(18)   |
| C30A | 70(3)    | 47(3)    | 46(2)    | 4.4(19)  | 12(2)    | -5(2)     |
| C31A | 51(2)    | 35(2)    | 33.6(17) | 2.9(14)  | 8.3(15)  | 1.7(16)   |
| C32A | 48(2)    | 43(2)    | 30.1(16) | 2.3(15)  | 2.8(14)  | 6.1(17)   |
| C33A | 53(2)    | 57(3)    | 45(2)    | -6(2)    | -1.4(18) | 12(2)     |
| C34A | 49(2)    | 48(2)    | 31.5(17) | 8.7(16)  | 13.2(15) | 10.4(17)  |
| C35A | 80(3)    | 39(2)    | 43(2)    | -2.2(17) | 17(2)    | 4(2)      |
| C36A | 58(3)    | 61(3)    | 45(2)    | -9(2)    | 1.5(19)  | -5(2)     |
| C37A | 83(4)    | 57(4)    | 77(4)    | -1(3)    | 0(3)     | 7(3)      |
| C38A | 61(4)    | 68(4)    | 127(7)   | -4(4)    | -2(4)    | 17(3)     |
| C39A | 83(5)    | 68(5)    | 128(7)   | -3(4)    | 41(5)    | -9(4)     |
| C40A | 75(4)    | 61(4)    | 112(6)   | 10(4)    | 30(4)    | -3(3)     |
| C41A | 66(3)    | 53(3)    | 70(3)    | 1(2)     | 10(3)    | 8(2)      |
| O10  | 58(2)    | 43(2)    | 89(3)    | -8.3(19) | 10.9(19) | -6.7(16)  |

**Table S52.** Bond Lengths for Gellman153.

| Atom | Atom | Length/Å  | Atom | Atom | Length/Å  |
|------|------|-----------|------|------|-----------|
| O1   | C4   | 1.465(7)  | N4A  | C21A | 1.335(6)  |
| O1   | C5   | 1.355(6)  | N4A  | C22A | 1.460(5)  |
| O2   | C5   | 1.224(5)  | N5A  | C31A | 1.355(6)  |
| O3   | C8   | 1.235(5)  | N5A  | C32A | 1.436(6)  |
| O4   | C18  | 1.233(5)  | C1A  | C4A  | 1.514(8)  |
| O5   | C21  | 1.244(4)  | C2A  | C4A  | 1.530(6)  |
| O6   | C31  | 1.229(6)  | C3A  | C4A  | 1.519(8)  |
| O7   | C34  | 1.198(8)  | C6A  | C7A  | 1.531(7)  |
| O8   | C34  | 1.304(7)  | C6A  | C8A  | 1.537(7)  |
| O8   | C35  | 1.462(10) | C9A  | C10A | 1.515(7)  |
| N1   | C5   | 1.339(7)  | C9A  | C14A | 1.542(6)  |
| N1   | C6   | 1.452(6)  | C10A | C11A | 1.530(8)  |
| N2   | C8   | 1.339(5)  | C11A | C12A | 1.539(9)  |
| N2   | C9   | 1.468(5)  | C12A | C13A | 1.520(9)  |
| N3   | C18  | 1.344(5)  | C13A | C14A | 1.539(6)  |
| N3   | C19  | 1.449(5)  | C14A | C15A | 1.561(6)  |
| N4   | C21  | 1.331(5)  | C15A | C16A | 1.527(7)  |
| N4   | C22  | 1.461(4)  | C15A | C18A | 1.528(6)  |
| N5   | C31  | 1.335(7)  | C16A | C17A | 1.541(10) |
| N5   | C32  | 1.455(6)  | C19A | C20A | 1.524(6)  |
| C1   | C4   | 1.514(9)  | C19A | C21A | 1.536(6)  |
| C2   | C4   | 1.530(7)  | C22A | C23A | 1.536(6)  |
| C3   | C4   | 1.534(7)  | C22A | C27A | 1.537(5)  |
| C6   | C7   | 1.534(6)  | C23A | C24A | 1.536(7)  |
| C6   | C8   | 1.528(5)  | C24A | C25A | 1.523(8)  |
| C9   | C10  | 1.525(5)  | C25A | C26A | 1.540(8)  |
| C9   | C14  | 1.538(5)  | C26A | C27A | 1.536(6)  |
| C10  | C11  | 1.531(6)  | C27A | C28A | 1.564(6)  |
| C11  | C12  | 1.514(7)  | C28A | C29A | 1.530(6)  |
| C12  | C13  | 1.529(6)  | C28A | C31A | 1.527(5)  |
| C13  | C14  | 1.541(5)  | C29A | C30A | 1.534(7)  |
| C14  | C15  | 1.554(5)  | C32A | C33A | 1.528(6)  |
| C15  | C16  | 1.542(5)  | C32A | C34A | 1.531(7)  |
| C15  | C18  | 1.521(5)  | C35A | C36A | 1.472(8)  |
| C16  | C17  | 1.521(6)  | C36A | C37A | 1.413(10) |
| C19  | C20  | 1.532(5)  | C36A | C41A | 1.343(9)  |
| C19  | C21  | 1.534(5)  | C37A | C38A | 1.352(13) |
| C22  | C23  | 1.531(5)  | C38A | C39A | 1.386(14) |
| C22  | C27  | 1.544(5)  | C39A | C40A | 1.338(13) |
| C23  | C24  | 1.529(5)  | C40A | C41A | 1.387(11) |
| C24  | C25  | 1.516(6)  | O9   | C42  | 1.415(9)  |
| C25  | C26  | 1.531(6)  | C42  | C43  | 1.474(10) |
| C26  | C27  | 1.533(5)  | O9A  | C42A | 1.405(12) |
| C27  | C28  | 1.551(5)  | C42A | C43A | 1.467(15) |
| C28  | C29  | 1.523(6)  | O10  | C44A | 1.432(12) |
| C28  | C31  | 1.527(6)  | O10  | C44  | 1.432(11) |
| C29  | C30  | 1.531(7)  | C44A | C45A | 1.469(16) |
| C32  | C33  | 1.517(9)  | C44  | C45  | 1.474(16) |
| C32  | C34  | 1.530(9)  | C46  | C47  | 1.49(3)   |



|     |      |           |      |      |           |
|-----|------|-----------|------|------|-----------|
| C35 | C36  | 1.470(11) | C47  | C48  | 1.367(17) |
| C36 | C37  | 1.422(10) | C48  | C49  | 1.53(2)   |
| C36 | C41  | 1.393(11) | C49  | C50  | 1.51(3)   |
| C37 | C38  | 1.324(13) | C50  | C51  | 1.46(3)   |
| C38 | C39  | 1.391(13) | C51  | C52  | 1.57(3)   |
| C39 | C40  | 1.371(11) | C46A | C47A | 1.50(5)   |
| C40 | C41  | 1.366(11) | C47A | C48A | 1.28(3)   |
| O1A | C4A  | 1.472(6)  | C48A | C49A | 1.54(5)   |
| O1A | C5A  | 1.352(5)  | C49A | C50A | 1.47(6)   |
| O2A | C5A  | 1.211(6)  | C50A | C51A | 1.42(6)   |
| O3A | C8A  | 1.225(7)  | C51A | C52A | 1.55(6)   |
| O4A | C18A | 1.218(5)  | C53  | C54  | 1.49(3)   |
| O5A | C21A | 1.237(6)  | C54  | C55  | 1.371(17) |
| O6A | C31A | 1.217(5)  | C55  | C56  | 1.53(2)   |
| O7A | C34A | 1.181(6)  | C56  | C57  | 1.50(3)   |
| O8A | C34A | 1.319(6)  | C57  | C58  | 1.46(3)   |
| O8A | C35A | 1.461(7)  | C58  | C59  | 1.57(3)   |
| N1A | C5A  | 1.329(7)  | C53A | C54A | 1.49(3)   |
| N1A | C6A  | 1.453(6)  | C54A | C55A | 1.369(17) |
| N2A | C8A  | 1.333(6)  | C55A | C56A | 1.53(2)   |
| N2A | C9A  | 1.476(5)  | C56A | C57A | 1.50(3)   |
| N3A | C18A | 1.343(6)  | C57A | C58A | 1.46(3)   |
| N3A | C19A | 1.443(6)  | C58A | C59A | 1.57(3)   |

**Table S53.** Bond Angles for Gellman153.

| Atom | Atom | Atom | Angle/°  | Atom | Atom | Atom | Angle/°  |
|------|------|------|----------|------|------|------|----------|
| C5   | O1   | C4   | 120.5(4) | C3A  | C4A  | C2A  | 110.3(4) |
| C34  | O8   | C35  | 118.7(6) | O2A  | C5A  | O1A  | 125.2(5) |
| C5   | N1   | C6   | 120.2(4) | O2A  | C5A  | N1A  | 124.9(4) |
| C8   | N2   | C9   | 123.6(3) | N1A  | C5A  | O1A  | 109.9(4) |
| C18  | N3   | C19  | 121.2(3) | N1A  | C6A  | C7A  | 109.4(4) |
| C21  | N4   | C22  | 125.5(3) | N1A  | C6A  | C8A  | 111.1(5) |
| C31  | N5   | C32  | 121.6(4) | C7A  | C6A  | C8A  | 107.1(5) |
| O1   | C4   | C1   | 111.2(4) | O3A  | C8A  | N2A  | 123.9(4) |
| O1   | C4   | C2   | 101.7(5) | O3A  | C8A  | C6A  | 122.1(4) |
| O1   | C4   | C3   | 109.0(5) | N2A  | C8A  | C6A  | 114.0(4) |
| C1   | C4   | C2   | 112.1(5) | N2A  | C9A  | C10A | 109.4(4) |
| C1   | C4   | C3   | 112.3(5) | N2A  | C9A  | C14A | 109.5(4) |
| C2   | C4   | C3   | 110.1(4) | C10A | C9A  | C14A | 111.6(4) |
| O2   | C5   | O1   | 124.9(4) | C9A  | C10A | C11A | 111.7(5) |
| O2   | C5   | N1   | 124.1(4) | C10A | C11A | C12A | 109.2(5) |
| N1   | C5   | O1   | 111.1(4) | C13A | C12A | C11A | 109.6(5) |
| N1   | C6   | C7   | 109.8(4) | C12A | C13A | C14A | 111.5(5) |
| N1   | C6   | C8   | 111.0(3) | C9A  | C14A | C15A | 110.2(3) |
| C8   | C6   | C7   | 109.5(3) | C13A | C14A | C9A  | 110.7(4) |
| O3   | C8   | N2   | 123.4(3) | C13A | C14A | C15A | 113.4(4) |
| O3   | C8   | C6   | 121.7(3) | C16A | C15A | C14A | 116.1(4) |
| N2   | C8   | C6   | 114.8(3) | C16A | C15A | C18A | 111.3(4) |

|     |     |     |          |      |      |      |           |
|-----|-----|-----|----------|------|------|------|-----------|
| N2  | C9  | C10 | 108.9(3) | C18A | C15A | C14A | 108.7(3)  |
| N2  | C9  | C14 | 109.4(3) | C15A | C16A | C17A | 111.3(5)  |
| C10 | C9  | C14 | 112.3(3) | O4A  | C18A | N3A  | 123.2(4)  |
| C9  | C10 | C11 | 112.2(3) | O4A  | C18A | C15A | 122.3(4)  |
| C12 | C11 | C10 | 110.1(4) | N3A  | C18A | C15A | 114.5(3)  |
| C11 | C12 | C13 | 111.0(4) | N3A  | C19A | C20A | 110.6(4)  |
| C12 | C13 | C14 | 112.5(3) | N3A  | C19A | C21A | 110.1(3)  |
| C9  | C14 | C13 | 110.3(3) | C20A | C19A | C21A | 110.1(4)  |
| C9  | C14 | C15 | 109.9(3) | O5A  | C21A | N4A  | 124.6(4)  |
| C13 | C14 | C15 | 114.2(3) | O5A  | C21A | C19A | 122.6(4)  |
| C16 | C15 | C14 | 115.0(3) | N4A  | C21A | C19A | 112.8(4)  |
| C18 | C15 | C14 | 109.3(3) | N4A  | C22A | C23A | 106.7(4)  |
| C18 | C15 | C16 | 110.9(3) | N4A  | C22A | C27A | 110.0(3)  |
| C17 | C16 | C15 | 110.9(3) | C23A | C22A | C27A | 111.0(4)  |
| O4  | C18 | N3  | 122.0(3) | C24A | C23A | C22A | 112.3(4)  |
| O4  | C18 | C15 | 122.8(3) | C25A | C24A | C23A | 108.7(4)  |
| N3  | C18 | C15 | 115.2(3) | C24A | C25A | C26A | 110.0(5)  |
| N3  | C19 | C20 | 110.1(3) | C27A | C26A | C25A | 110.4(4)  |
| N3  | C19 | C21 | 109.7(3) | C22A | C27A | C28A | 110.5(3)  |
| C20 | C19 | C21 | 109.2(3) | C26A | C27A | C22A | 111.0(4)  |
| O5  | C21 | N4  | 124.0(3) | C26A | C27A | C28A | 113.3(4)  |
| O5  | C21 | C19 | 121.9(3) | C29A | C28A | C27A | 114.7(3)  |
| N4  | C21 | C19 | 114.1(3) | C31A | C28A | C27A | 108.8(3)  |
| N4  | C22 | C23 | 108.2(3) | C31A | C28A | C29A | 110.7(3)  |
| N4  | C22 | C27 | 110.7(3) | C28A | C29A | C30A | 111.2(4)  |
| C23 | C22 | C27 | 111.0(3) | O6A  | C31A | N5A  | 122.2(4)  |
| C24 | C23 | C22 | 111.6(3) | O6A  | C31A | C28A | 123.4(4)  |
| C25 | C24 | C23 | 110.6(3) | N5A  | C31A | C28A | 114.4(3)  |
| C24 | C25 | C26 | 110.7(3) | N5A  | C32A | C33A | 110.1(4)  |
| C25 | C26 | C27 | 111.6(3) | N5A  | C32A | C34A | 108.2(4)  |
| C22 | C27 | C28 | 110.9(3) | C33A | C32A | C34A | 109.7(4)  |
| C26 | C27 | C22 | 110.2(3) | O7A  | C34A | O8A  | 124.7(5)  |
| C26 | C27 | C28 | 113.7(3) | O7A  | C34A | C32A | 123.6(5)  |
| C29 | C28 | C27 | 114.5(3) | O8A  | C34A | C32A | 111.7(3)  |
| C29 | C28 | C31 | 111.4(4) | O8A  | C35A | C36A | 109.2(4)  |
| C31 | C28 | C27 | 108.7(3) | C37A | C36A | C35A | 120.7(6)  |
| C28 | C29 | C30 | 111.9(4) | C41A | C36A | C35A | 121.5(6)  |
| O6  | C31 | N5  | 121.7(4) | C41A | C36A | C37A | 117.6(6)  |
| O6  | C31 | C28 | 123.4(5) | C38A | C37A | C36A | 121.6(8)  |
| N5  | C31 | C28 | 114.9(4) | C37A | C38A | C39A | 117.5(7)  |
| N5  | C32 | C33 | 110.6(4) | C40A | C39A | C38A | 123.0(8)  |
| N5  | C32 | C34 | 109.6(4) | C39A | C40A | C41A | 117.9(7)  |
| C33 | C32 | C34 | 108.9(6) | C36A | C41A | C40A | 122.3(6)  |
| O7  | C34 | O8  | 124.9(7) | O9   | C42  | C43  | 109.5(6)  |
| O7  | C34 | C32 | 123.9(6) | O9A  | C42A | C43A | 112.2(13) |
| O8  | C34 | C32 | 110.9(5) | O10  | C44A | C45A | 107.9(16) |
| O8  | C35 | C36 | 109.9(6) | O10  | C44  | C45  | 108.0(12) |
| C37 | C36 | C35 | 119.4(7) | C48  | C47  | C46  | 121.9(19) |
| C41 | C36 | C35 | 123.5(6) | C47  | C48  | C49  | 134.0(19) |
| C41 | C36 | C37 | 116.9(7) | C50  | C49  | C48  | 117.3(18) |
| C38 | C37 | C36 | 121.8(8) | C51  | C50  | C49  | 115(2)    |

|      |     |      |          |      |      |      |           |
|------|-----|------|----------|------|------|------|-----------|
| C37  | C38 | C39  | 120.7(8) | C50  | C51  | C52  | 103.6(17) |
| C40  | C39 | C38  | 118.7(7) | C48A | C47A | C46A | 119(3)    |
| C41  | C40 | C39  | 121.5(7) | C47A | C48A | C49A | 110(3)    |
| C40  | C41 | C36  | 120.3(7) | C50A | C49A | C48A | 112(4)    |
| C5A  | O1A | C4A  | 121.7(4) | C51A | C50A | C49A | 123(5)    |
| C34A | O8A | C35A | 115.5(4) | C50A | C51A | C52A | 123(4)    |
| C5A  | N1A | C6A  | 121.2(4) | C55  | C54  | C53  | 122.3(19) |
| C8A  | N2A | C9A  | 122.3(4) | C54  | C55  | C56  | 130.9(18) |
| C18A | N3A | C19A | 120.7(3) | C57  | C56  | C55  | 118.0(18) |
| C21A | N4A | C22A | 124.8(4) | C58  | C57  | C56  | 114(2)    |
| C31A | N5A | C32A | 119.3(3) | C57  | C58  | C59  | 103.0(17) |
| O1A  | C4A | C1A  | 110.5(4) | C55A | C54A | C53A | 121.6(19) |
| O1A  | C4A | C2A  | 102.1(5) | C54A | C55A | C56A | 132.1(18) |
| O1A  | C4A | C3A  | 109.4(4) | C57A | C56A | C55A | 117.4(17) |
| C1A  | C4A | C2A  | 112.3(5) | C58A | C57A | C56A | 114(2)    |
| C1A  | C4A | C3A  | 111.9(5) | C57A | C58A | C59A | 103.3(17) |

**Table S54.** Hydrogen Bonds for Gellman153.

| D   | H    | A                | d(D-H)/Å | d(H-A)/Å | d(D-A)/Å | D-H-A/° |
|-----|------|------------------|----------|----------|----------|---------|
| N1  | H1   | O7 <sup>1</sup>  | 0.88     | 2.09     | 2.893(7) | 151.7   |
| N2  | H2   | O9               | 0.88     | 2.16     | 2.945(5) | 148.0   |
| N3  | H3   | O2               | 0.88     | 2.05     | 2.913(4) | 165.8   |
| N4  | H4   | O3 <sup>2</sup>  | 0.88     | 1.92     | 2.784(4) | 165.7   |
| N5  | H5   | O4               | 0.88     | 2.08     | 2.951(5) | 173.0   |
| N1A | H1AA | O7A <sup>3</sup> | 0.88     | 1.99     | 2.860(5) | 169.6   |
| N2A | H2AA | O10              | 0.88     | 2.12     | 2.886(6) | 145.2   |
| N3A | H3AA | O2A              | 0.88     | 2.07     | 2.934(4) | 167.5   |
| N4A | H4A  | O3A <sup>4</sup> | 0.88     | 1.95     | 2.816(5) | 169.7   |
| N5A | H5A  | O4A              | 0.88     | 2.16     | 2.982(5) | 154.3   |
| O9  | H9B  | O5               | 0.84     | 1.92     | 2.725(5) | 160.1   |
| O10 | H10  | O5A              | 0.84     | 1.88     | 2.704(5) | 166.8   |

<sup>1</sup>1-X,1/2+Y,1-Z; <sup>2</sup>1-X,-1/2+Y,1-Z; <sup>3</sup>1-X,-1/2+Y,-Z; <sup>4</sup>1-X,1/2+Y,-Z

**Table S55.** Torsion Angles for Gellman153.

| A  | B   | C   | D   | Angle/°   | A   | B    | C    | D    | Angle/°   |
|----|-----|-----|-----|-----------|-----|------|------|------|-----------|
| O8 | C35 | C36 | C37 | 121.3(9)  | N4A | C22A | C23A | C24A | -174.4(4) |
| O8 | C35 | C36 | C41 | -53.1(11) | N4A | C22A | C27A | C26A | 170.9(4)  |
| N1 | C6  | C8  | O3  | -35.1(5)  | N4A | C22A | C27A | C28A | -62.6(4)  |
| N1 | C6  | C8  | N2  | 148.2(3)  | N5A | C32A | C34A | O7A  | -19.4(6)  |
| N2 | C9  | C10 | C11 | -175.6(3) | N5A | C32A | C34A | O8A  | 162.4(4)  |
| N2 | C9  | C14 | C13 | 172.7(3)  | C4A | O1A  | C5A  | O2A  | -4.9(8)   |
| N2 | C9  | C14 | C15 | -60.6(3)  | C4A | O1A  | C5A  | N1A  | 173.1(5)  |
| N3 | C19 | C21 | O5  | -35.1(4)  | C5A | O1A  | C4A  | C1A  | 61.3(6)   |
| N3 | C19 | C21 | N4  | 146.8(3)  | C5A | O1A  | C4A  | C2A  | -179.1(5) |
| N4 | C22 | C23 | C24 | -177.3(3) | C5A | O1A  | C4A  | C3A  | -62.3(6)  |

|     |     |     |     |           |      |      |      |      |           |
|-----|-----|-----|-----|-----------|------|------|------|------|-----------|
| N4  | C22 | C27 | C26 | 174.8(3)  | C5A  | N1A  | C6A  | C7A  | 173.0(6)  |
| N4  | C22 | C27 | C28 | -58.5(4)  | C5A  | N1A  | C6A  | C8A  | -68.9(7)  |
| N5  | C32 | C34 | O7  | -17.9(9)  | C6A  | N1A  | C5A  | O1A  | 178.0(5)  |
| N5  | C32 | C34 | O8  | 156.1(5)  | C6A  | N1A  | C5A  | O2A  | -4.0(9)   |
| C4  | O1  | C5  | O2  | -12.6(7)  | C7A  | C6A  | C8A  | O3A  | 86.5(6)   |
| C4  | O1  | C5  | N1  | 167.8(4)  | C7A  | C6A  | C8A  | N2A  | -91.8(6)  |
| C5  | O1  | C4  | C1  | 64.5(6)   | C8A  | N2A  | C9A  | C10A | -130.3(5) |
| C5  | O1  | C4  | C2  | -176.1(4) | C8A  | N2A  | C9A  | C14A | 107.1(5)  |
| C5  | O1  | C4  | C3  | -59.8(6)  | C9A  | N2A  | C8A  | O3A  | 0.3(7)    |
| C5  | N1  | C6  | C7  | 171.7(4)  | C9A  | N2A  | C8A  | C6A  | 178.5(4)  |
| C5  | N1  | C6  | C8  | -67.1(5)  | C9A  | C10A | C11A | C12A | 58.7(7)   |
| C6  | N1  | C5  | O1  | 178.1(4)  | C9A  | C14A | C15A | C16A | -91.8(5)  |
| C6  | N1  | C5  | O2  | -1.5(7)   | C9A  | C14A | C15A | C18A | 141.9(4)  |
| C7  | C6  | C8  | O3  | 86.3(5)   | C10A | C9A  | C14A | C13A | 52.5(6)   |
| C7  | C6  | C8  | N2  | -90.4(4)  | C10A | C9A  | C14A | C15A | 178.8(4)  |
| C8  | N2  | C9  | C10 | -127.4(4) | C10A | C11A | C12A | C13A | -59.9(8)  |
| C8  | N2  | C9  | C14 | 109.5(4)  | C11A | C12A | C13A | C14A | 58.9(7)   |
| C9  | N2  | C8  | O3  | 0.8(6)    | C12A | C13A | C14A | C9A  | -54.7(6)  |
| C9  | N2  | C8  | C6  | 177.5(3)  | C12A | C13A | C14A | C15A | -179.2(5) |
| C9  | C10 | C11 | C12 | 56.4(5)   | C13A | C14A | C15A | C16A | 32.9(6)   |
| C9  | C14 | C15 | C16 | -93.3(4)  | C13A | C14A | C15A | C18A | -93.3(5)  |
| C9  | C14 | C15 | C18 | 141.1(3)  | C14A | C9A  | C10A | C11A | -55.4(6)  |
| C10 | C9  | C14 | C13 | 51.6(4)   | C14A | C15A | C16A | C17A | 167.2(5)  |
| C10 | C9  | C14 | C15 | 178.4(3)  | C14A | C15A | C18A | O4A  | 67.7(5)   |
| C10 | C11 | C12 | C13 | -57.1(5)  | C14A | C15A | C18A | N3A  | -111.6(4) |
| C11 | C12 | C13 | C14 | 56.8(5)   | C16A | C15A | C18A | O4A  | -61.3(6)  |
| C12 | C13 | C14 | C9  | -53.1(4)  | C16A | C15A | C18A | N3A  | 119.4(4)  |
| C12 | C13 | C14 | C15 | -177.4(3) | C18A | N3A  | C19A | C20A | 168.8(4)  |
| C13 | C14 | C15 | C16 | 31.3(5)   | C18A | N3A  | C19A | C21A | -69.3(5)  |
| C13 | C14 | C15 | C18 | -94.3(3)  | C18A | C15A | C16A | C17A | -67.8(6)  |
| C14 | C9  | C10 | C11 | -54.3(4)  | C19A | N3A  | C18A | O4A  | -1.4(7)   |
| C14 | C15 | C16 | C17 | 167.5(4)  | C19A | N3A  | C18A | C15A | 177.8(4)  |
| C14 | C15 | C18 | O4  | 69.9(4)   | C20A | C19A | C21A | O5A  | 83.4(5)   |
| C14 | C15 | C18 | N3  | -107.5(3) | C20A | C19A | C21A | N4A  | -93.8(4)  |
| C16 | C15 | C18 | O4  | -57.9(5)  | C21A | N4A  | C22A | C23A | -139.9(4) |
| C16 | C15 | C18 | N3  | 124.7(3)  | C21A | N4A  | C22A | C27A | 99.6(4)   |
| C18 | N3  | C19 | C20 | 176.9(3)  | C22A | N4A  | C21A | O5A  | 1.4(6)    |
| C18 | N3  | C19 | C21 | -62.8(4)  | C22A | N4A  | C21A | C19A | 178.6(4)  |
| C18 | C15 | C16 | C17 | -67.8(5)  | C22A | C23A | C24A | C25A | 58.0(6)   |
| C19 | N3  | C18 | O4  | -1.6(5)   | C22A | C27A | C28A | C29A | -81.2(4)  |
| C19 | N3  | C18 | C15 | 175.8(3)  | C22A | C27A | C28A | C31A | 154.2(3)  |
| C20 | C19 | C21 | O5  | 85.7(4)   | C23A | C22A | C27A | C26A | 53.0(5)   |
| C20 | C19 | C21 | N4  | -92.5(4)  | C23A | C22A | C27A | C28A | 179.5(4)  |
| C21 | N4  | C22 | C23 | -140.3(3) | C23A | C24A | C25A | C26A | -60.3(7)  |
| C21 | N4  | C22 | C27 | 97.8(4)   | C24A | C25A | C26A | C27A | 60.4(6)   |
| C22 | N4  | C21 | O5  | -2.2(5)   | C25A | C26A | C27A | C22A | -56.2(6)  |
| C22 | N4  | C21 | C19 | 175.9(3)  | C25A | C26A | C27A | C28A | 178.8(4)  |
| C22 | C23 | C24 | C25 | 56.9(5)   | C26A | C27A | C28A | C29A | 44.0(5)   |
| C22 | C27 | C28 | C29 | -84.3(4)  | C26A | C27A | C28A | C31A | -80.6(5)  |
| C22 | C27 | C28 | C31 | 150.4(3)  | C27A | C22A | C23A | C24A | -54.6(6)  |
| C23 | C22 | C27 | C26 | 54.6(4)   | C27A | C28A | C29A | C30A | 165.7(3)  |

|     |      |      |      |            |      |      |      |      |           |
|-----|------|------|------|------------|------|------|------|------|-----------|
| C23 | C22  | C27  | C28  | -178.7(3)  | C27A | C28A | C31A | O6A  | 67.9(5)   |
| C23 | C24  | C25  | C26  | -57.1(5)   | C27A | C28A | C31A | N5A  | -110.5(4) |
| C24 | C25  | C26  | C27  | 57.3(5)    | C29A | C28A | C31A | O6A  | -59.0(6)  |
| C25 | C26  | C27  | C22  | -55.6(4)   | C29A | C28A | C31A | N5A  | 122.5(4)  |
| C25 | C26  | C27  | C28  | 179.2(3)   | C31A | N5A  | C32A | C33A | 170.2(4)  |
| C26 | C27  | C28  | C29  | 40.6(4)    | C31A | N5A  | C32A | C34A | -69.9(5)  |
| C26 | C27  | C28  | C31  | -84.7(4)   | C31A | C28A | C29A | C30A | -70.7(5)  |
| C27 | C22  | C23  | C24  | -55.7(4)   | C32A | N5A  | C31A | O6A  | -17.8(7)  |
| C27 | C28  | C29  | C30  | 168.6(4)   | C32A | N5A  | C31A | C28A | 160.7(4)  |
| C27 | C28  | C31  | O6   | 64.3(6)    | C33A | C32A | C34A | O7A  | 100.8(5)  |
| C27 | C28  | C31  | N5   | -115.3(4)  | C33A | C32A | C34A | O8A  | -77.4(4)  |
| C29 | C28  | C31  | O6   | -62.8(6)   | C34A | O8A  | C35A | C36A | -85.5(5)  |
| C29 | C28  | C31  | N5   | 117.6(4)   | C35A | O8A  | C34A | O7A  | -6.8(7)   |
| C31 | N5   | C32  | C33  | 169.2(6)   | C35A | O8A  | C34A | C32A | 171.3(4)  |
| C31 | N5   | C32  | C34  | -70.6(6)   | C35A | C36A | C37A | C38A | -176.5(7) |
| C31 | C28  | C29  | C30  | -67.5(5)   | C35A | C36A | C41A | C40A | 176.4(7)  |
| C32 | N5   | C31  | O6   | -3.9(8)    | C36A | C37A | C38A | C39A | -1.3(13)  |
| C32 | N5   | C31  | C28  | 175.7(4)   | C37A | C36A | C41A | C40A | 0.8(10)   |
| C33 | C32  | C34  | O7   | 103.3(8)   | C37A | C38A | C39A | C40A | 3.9(15)   |
| C33 | C32  | C34  | O8   | -82.8(6)   | C38A | C39A | C40A | C41A | -4.0(16)  |
| C34 | O8   | C35  | C36  | 107.2(8)   | C39A | C40A | C41A | C36A | 1.6(13)   |
| C35 | O8   | C34  | O7   | 1.4(10)    | C41A | C36A | C37A | C38A | -0.9(10)  |
| C35 | O8   | C34  | C32  | -172.4(6)  | C44A | O10  | C44  | C45  | 106(32)   |
| C35 | C36  | C37  | C38  | -176.2(10) | C44  | O10  | C44A | C45A | 3(28)     |
| C35 | C36  | C41  | C40  | 174.8(8)   | C46  | C47  | C48  | C49  | -166(4)   |
| C36 | C37  | C38  | C39  | 2.5(17)    | C47  | C48  | C49  | C50  | 153(5)    |
| C37 | C36  | C41  | C40  | 0.3(13)    | C48  | C49  | C50  | C51  | 163(4)    |
| C37 | C38  | C39  | C40  | -2.1(14)   | C49  | C50  | C51  | C52  | 177(4)    |
| C38 | C39  | C40  | C41  | 0.9(12)    | C46A | C47A | C48A | C49A | -162(3)   |
| C39 | C40  | C41  | C36  | 0.0(13)    | C47A | C48A | C49A | C50A | -178(4)   |
| C41 | C36  | C37  | C38  | -1.5(15)   | C48A | C49A | C50A | C51A | 177(5)    |
| O8A | C35A | C36A | C37A | -35.9(7)   | C49A | C50A | C51A | C52A | 174(4)    |
| O8A | C35A | C36A | C41A | 148.7(5)   | C53  | C54  | C55  | C56  | -166(4)   |
| N1A | C6A  | C8A  | O3A  | -32.9(6)   | C54  | C55  | C56  | C57  | -170(4)   |
| N1A | C6A  | C8A  | N2A  | 148.8(4)   | C55  | C56  | C57  | C58  | 169(3)    |
| N2A | C9A  | C10A | C11A | -176.7(4)  | C56  | C57  | C58  | C59  | 80(4)     |
| N2A | C9A  | C14A | C13A | 173.8(4)   | C53A | C54A | C55A | C56A | -166(3)   |
| N2A | C9A  | C14A | C15A | -59.9(5)   | C54A | C55A | C56A | C57A | -120(4)   |
| N3A | C19A | C21A | O5A  | -38.7(5)   | C55A | C56A | C57A | C58A | -130(3)   |
| N3A | C19A | C21A | N4A  | 144.0(4)   | C56A | C57A | C58A | C59A | -157(3)   |

**Table S56.** Hydrogen Atom Coordinates ( $\text{\AA}\times 10^4$ ) and Isotropic Displacement Parameters ( $\text{\AA}^2\times 10^3$ ) for Gellman153.

| Atom | x    | y     | z    | U(eq) |
|------|------|-------|------|-------|
| H1   | 7064 | 2556  | 6219 | 56    |
| H2   | 3782 | 2286  | 5408 | 40    |
| H3   | 4938 | 575   | 5207 | 36    |
| H4   | 3298 | -1551 | 5133 | 34    |

|      |      |       |      |     |
|------|------|-------|------|-----|
| H5   | 2114 | -385  | 3621 | 58  |
| H1A  | 7259 | 311   | 5248 | 102 |
| H1B  | 8357 | -60   | 5339 | 102 |
| H1C  | 8189 | 754   | 5067 | 102 |
| H2A  | 9601 | 1208  | 5911 | 104 |
| H2B  | 9740 | 394   | 6185 | 104 |
| H2C  | 9498 | 1062  | 6600 | 104 |
| H3A  | 8029 | 455   | 6857 | 91  |
| H3B  | 8142 | -257  | 6456 | 91  |
| H3C  | 7104 | 196   | 6347 | 91  |
| H6   | 5121 | 2135  | 6135 | 46  |
| H7A  | 5651 | 3197  | 6694 | 80  |
| H7B  | 4768 | 3436  | 6150 | 80  |
| H7C  | 5925 | 3598  | 6110 | 80  |
| H9   | 3983 | 2709  | 4239 | 39  |
| H10A | 2848 | 3467  | 4627 | 49  |
| H10B | 2222 | 2772  | 4794 | 49  |
| H11A | 1333 | 3306  | 3896 | 55  |
| H11B | 2309 | 3241  | 3582 | 55  |
| H12A | 1193 | 2269  | 3243 | 52  |
| H12B | 1196 | 2018  | 3927 | 52  |
| H13A | 2911 | 1946  | 3331 | 45  |
| H13B | 2296 | 1248  | 3504 | 45  |
| H14  | 2863 | 1459  | 4542 | 37  |
| H15  | 4762 | 1445  | 4566 | 37  |
| H16A | 4150 | 961   | 3338 | 49  |
| H16B | 4624 | 1761  | 3501 | 49  |
| H17A | 5911 | 943   | 3339 | 86  |
| H17B | 5658 | 411   | 3860 | 86  |
| H17C | 6131 | 1208  | 4030 | 86  |
| H19  | 4530 | -847  | 4972 | 38  |
| H20A | 5760 | -526  | 5822 | 62  |
| H20B | 4907 | -1007 | 6051 | 62  |
| H20C | 4922 | -133  | 6134 | 62  |
| H22  | 1621 | -1095 | 5591 | 35  |
| H23A | 2315 | -2554 | 5381 | 42  |
| H23B | 2429 | -2167 | 6031 | 42  |
| H24A | 1046 | -3012 | 5883 | 51  |
| H24B | 657  | -2194 | 5975 | 51  |
| H25A | -417 | -2740 | 5148 | 51  |
| H25B | 529  | -2911 | 4827 | 51  |
| H26A | -192 | -1461 | 5036 | 46  |
| H26B | -312 | -1845 | 4386 | 46  |
| H27  | 1456 | -1832 | 4442 | 36  |
| H28  | 1759 | -483  | 4494 | 42  |
| H29A | 420  | -197  | 5040 | 56  |
| H29B | -377 | -381  | 4437 | 56  |
| H30A | 400  | 577   | 3927 | 92  |
| H30B | 1067 | 794   | 4568 | 92  |
| H30C | -137 | 887   | 4455 | 92  |
| H32  | 831  | -565  | 2552 | 62  |

|      |       |       |       |     |
|------|-------|-------|-------|-----|
| H33A | 2249  | 229   | 2615  | 127 |
| H33B | 2258  | -374  | 2097  | 127 |
| H33C | 2994  | -464  | 2739  | 127 |
| H35A | 1611  | -2788 | 2225  | 100 |
| H35B | 1403  | -2550 | 1525  | 100 |
| H37  | -12   | -3086 | 965   | 107 |
| H38  | -1644 | -3451 | 818   | 101 |
| H39  | -2612 | -3287 | 1577  | 91  |
| H40  | -1841 | -2823 | 2509  | 85  |
| H41  | -162  | -2484 | 2688  | 89  |
| H1AA | 4035  | -175  | -1718 | 67  |
| H2AA | 3302  | 71    | 134   | 51  |
| H3AA | 4539  | 1772  | -202  | 48  |
| H4A  | 3874  | 3891  | 595   | 47  |
| H5A  | 5040  | 2399  | 2001  | 52  |
| H1AB | 5873  | 1917  | -1189 | 96  |
| H1AC | 6469  | 2254  | -1681 | 96  |
| H1AD | 6649  | 1416  | -1471 | 96  |
| H2AB | 6284  | 1080  | -2547 | 106 |
| H2AC | 5839  | 1843  | -2837 | 106 |
| H2AD | 5148  | 1120  | -2917 | 106 |
| H3AB | 3908  | 1959  | -2490 | 87  |
| H3AC | 4727  | 2600  | -2322 | 87  |
| H3AD | 4204  | 2242  | -1806 | 87  |
| H6A  | 3008  | 266   | -855  | 65  |
| H7AA | 3490  | -1205 | -1183 | 122 |
| H7AB | 2450  | -787  | -1435 | 122 |
| H7AC | 2716  | -1030 | -739  | 122 |
| H9A  | 5180  | -448  | 741   | 54  |
| H10C | 3825  | -1119 | 986   | 68  |
| H10D | 3301  | -384  | 1170  | 68  |
| H11C | 5186  | -963  | 1816  | 84  |
| H11D | 4135  | -989  | 2059  | 84  |
| H12C | 4106  | 328   | 2099  | 82  |
| H12D | 5123  | 26    | 2515  | 82  |
| H13C | 6042  | 262   | 1732  | 72  |
| H13D | 5516  | 1005  | 1900  | 72  |
| H14A | 4197  | 863   | 1060  | 51  |
| H15A | 5252  | 837   | 231   | 49  |
| H16C | 6785  | 415   | 878   | 71  |
| H16D | 6866  | 1206  | 1197  | 71  |
| H17D | 6848  | 1009  | -75   | 115 |
| H17E | 7858  | 1156  | 411   | 115 |
| H17F | 7009  | 1782  | 272   | 115 |
| H19A | 4827  | 3160  | 214   | 52  |
| H20D | 4444  | 2873  | -852  | 84  |
| H20E | 3764  | 3528  | -668  | 84  |
| H20F | 3298  | 2719  | -783  | 84  |
| H22A | 2005  | 3538  | 882   | 46  |
| H23C | 3043  | 4924  | 856   | 63  |
| H23D | 2083  | 4663  | 371   | 63  |

|      |       |       |      |     |
|------|-------|-------|------|-----|
| H24C | 1575  | 5529  | 1059 | 68  |
| H24D | 1031  | 4752  | 1113 | 68  |
| H25C | 1737  | 5206  | 2097 | 71  |
| H25D | 2836  | 5229  | 1915 | 71  |
| H26C | 2656  | 4132  | 2478 | 61  |
| H26D | 1694  | 3895  | 1982 | 61  |
| H27A | 3716  | 4046  | 1750 | 46  |
| H28A | 3561  | 2716  | 1517 | 46  |
| H29C | 1784  | 2613  | 1613 | 53  |
| H29D | 2156  | 2660  | 2331 | 53  |
| H30D | 2774  | 1530  | 1583 | 82  |
| H30E | 1979  | 1409  | 2024 | 82  |
| H30F | 3141  | 1575  | 2301 | 82  |
| H32A | 5793  | 2707  | 3174 | 49  |
| H33D | 6639  | 1840  | 2650 | 79  |
| H33E | 7407  | 2486  | 2909 | 79  |
| H33F | 6898  | 2473  | 2207 | 79  |
| H35C | 7360  | 4831  | 3568 | 64  |
| H35D | 6642  | 4934  | 2920 | 64  |
| H37A | 8609  | 3599  | 3210 | 89  |
| H38A | 10066 | 3589  | 2801 | 106 |
| H39A | 10339 | 4556  | 2167 | 108 |
| H40A | 9316  | 5567  | 2038 | 97  |
| H41A | 7843  | 5563  | 2453 | 76  |
| H9B  | 3119  | 997   | 5683 | 55  |
| H42A | 2114  | 1188  | 6374 | 67  |
| H42B | 1626  | 1423  | 5694 | 67  |
| H43A | 2743  | 2421  | 6521 | 82  |
| H43B | 1538  | 2353  | 6434 | 82  |
| H43C | 2052  | 2621  | 5883 | 82  |
| H9AA | 3465  | 898   | 5906 | 45  |
| H42C | 2905  | 2061  | 6464 | 53  |
| H42D | 2901  | 1225  | 6687 | 53  |
| H43D | 1275  | 1704  | 6283 | 111 |
| H43E | 1537  | 955   | 5971 | 111 |
| H43F | 1610  | 1723  | 5634 | 111 |
| H10  | 2565  | 1429  | 239  | 96  |
| H10E | 2616  | 1414  | 248  | 96  |
| H44A | 856   | 971   | -79  | 118 |
| H44B | 1221  | 1477  | 507  | 118 |
| H45A | 505   | 325   | 722  | 147 |
| H45B | 1610  | 475   | 1108 | 147 |
| H45C | 1472  | -65   | 537  | 147 |
| H44C | 1006  | 1414  | 257  | 118 |
| H44D | 1420  | 824   | 776  | 118 |
| H45D | 645   | 518   | -455 | 147 |
| H45E | 194   | 236   | 116  | 147 |
| H45F | 1243  | -88   | -10  | 147 |
| H46A | 6730  | -593  | 3991 | 222 |
| H46B | 7873  | -519  | 3889 | 222 |
| H46C | 7440  | -1306 | 4036 | 222 |



|      |       |       |      |     |
|------|-------|-------|------|-----|
| H47A | 6528  | -1431 | 3128 | 178 |
| H47B | 6457  | -569  | 3011 | 178 |
| H48A | 7957  | -1500 | 2898 | 178 |
| H48B | 8103  | -640  | 2914 | 178 |
| H49A | 7324  | -1527 | 1938 | 178 |
| H49B | 6910  | -704  | 1923 | 178 |
| H50A | 8439  | -222  | 1871 | 178 |
| H50B | 9012  | -975  | 2077 | 178 |
| H51A | 7746  | -763  | 937  | 178 |
| H51B | 8387  | -1498 | 1145 | 178 |
| H52A | 9180  | -359  | 642  | 222 |
| H52B | 9869  | -954  | 1051 | 222 |
| H52C | 9574  | -202  | 1347 | 222 |
| H46D | 6760  | -686  | 3609 | 222 |
| H46E | 7641  | -197  | 3993 | 222 |
| H46F | 7883  | -1010 | 3786 | 222 |
| H47C | 7218  | 118   | 2942 | 178 |
| H47D | 8392  | -5    | 3197 | 178 |
| H48C | 7091  | -836  | 2449 | 178 |
| H48D | 8136  | -1159 | 2815 | 178 |
| H49C | 8017  | 125   | 2050 | 178 |
| H49D | 9055  | -217  | 2405 | 178 |
| H50C | 8776  | -1270 | 1842 | 178 |
| H50D | 7711  | -968  | 1507 | 178 |
| H51C | 9537  | -388  | 1355 | 178 |
| H51D | 8453  | -171  | 989  | 178 |
| H52D | 8360  | -1298 | 453  | 222 |
| H52E | 9447  | -1527 | 826  | 222 |
| H52F | 9346  | -844  | 370  | 222 |
| H53A | 9158  | 651   | 2747 | 222 |
| H53B | 8851  | 1496  | 2795 | 222 |
| H53C | 10005 | 1247  | 3003 | 222 |
| H54A | 10255 | 1108  | 2075 | 178 |
| H54B | 9091  | 968   | 1813 | 178 |
| H55A | 10071 | 2252  | 2056 | 178 |
| H55B | 8879  | 2195  | 1943 | 178 |
| H56A | 9986  | 1955  | 1010 | 178 |
| H56B | 8789  | 2040  | 931  | 178 |
| H57A | 8912  | 3274  | 1111 | 178 |
| H57B | 10111 | 3226  | 1329 | 178 |
| H58A | 10131 | 2820  | 284  | 178 |
| H58B | 9962  | 3683  | 398  | 178 |
| H59A | 8609  | 2979  | -370 | 222 |
| H59B | 8246  | 3612  | 38   | 222 |
| H59C | 8189  | 2768  | 231  | 222 |
| H53D | 8798  | 1172  | 2341 | 222 |
| H53E | 9006  | 1687  | 2928 | 222 |
| H53F | 9931  | 1290  | 2699 | 222 |
| H54C | 8842  | 2527  | 2231 | 178 |
| H54D | 10034 | 2410  | 2354 | 178 |
| H55C | 8647  | 1966  | 1406 | 178 |

|      |       |      |      |     |
|------|-------|------|------|-----|
| H55D | 9760  | 1653 | 1536 | 178 |
| H56C | 9920  | 3082 | 1311 | 178 |
| H56D | 10206 | 2397 | 932  | 178 |
| H57C | 8225  | 2537 | 591  | 178 |
| H57D | 8645  | 3362 | 631  | 178 |
| H58C | 9004  | 2248 | -165 | 178 |
| H58D | 9831  | 2894 | -2   | 178 |
| H59D | 8391  | 3200 | -850 | 222 |
| H59E | 8616  | 3812 | -331 | 222 |
| H59F | 7698  | 3248 | -343 | 222 |

**Table S57.** Atomic Occupancy for Gellman153.

| <b>Atom</b> | <b>Occupancy</b> | <b>Atom</b> | <b>Occupancy</b> | <b>Atom</b> | <b>Occupancy</b> |
|-------------|------------------|-------------|------------------|-------------|------------------|
| O9          | 0.732(16)        | H9B         | 0.732(16)        | C42         | 0.732(16)        |
| H42A        | 0.732(16)        | H42B        | 0.732(16)        | C43         | 0.732(16)        |
| H43A        | 0.732(16)        | H43B        | 0.732(16)        | H43C        | 0.732(16)        |
| O9A         | 0.268(16)        | H9AA        | 0.268(16)        | C42A        | 0.268(16)        |
| H42C        | 0.268(16)        | H42D        | 0.268(16)        | C43A        | 0.268(16)        |
| H43D        | 0.268(16)        | H43E        | 0.268(16)        | H43F        | 0.268(16)        |
| H10         | 0.685(19)        | H10E        | 0.315(19)        | C44A        | 0.315(19)        |
| H44A        | 0.315(19)        | H44B        | 0.315(19)        | C45A        | 0.315(19)        |
| H45A        | 0.315(19)        | H45B        | 0.315(19)        | H45C        | 0.315(19)        |
| C44         | 0.685(19)        | H44C        | 0.685(19)        | H44D        | 0.685(19)        |
| C45         | 0.685(19)        | H45D        | 0.685(19)        | H45E        | 0.685(19)        |
| H45F        | 0.685(19)        | C46         | 0.5              | H46A        | 0.5              |
| H46B        | 0.5              | H46C        | 0.5              | C47         | 0.5              |
| H47A        | 0.5              | H47B        | 0.5              | C48         | 0.5              |
| H48A        | 0.5              | H48B        | 0.5              | C49         | 0.5              |
| H49A        | 0.5              | H49B        | 0.5              | C50         | 0.5              |
| H50A        | 0.5              | H50B        | 0.5              | C51         | 0.5              |
| H51A        | 0.5              | H51B        | 0.5              | C52         | 0.5              |
| H52A        | 0.5              | H52B        | 0.5              | H52C        | 0.5              |
| C46A        | 0.5              | H46D        | 0.5              | H46E        | 0.5              |
| H46F        | 0.5              | C47A        | 0.5              | H47C        | 0.5              |
| H47D        | 0.5              | C48A        | 0.5              | H48C        | 0.5              |
| H48D        | 0.5              | C49A        | 0.5              | H49C        | 0.5              |
| H49D        | 0.5              | C50A        | 0.5              | H50C        | 0.5              |
| H50D        | 0.5              | C51A        | 0.5              | H51C        | 0.5              |
| H51D        | 0.5              | C52A        | 0.5              | H52D        | 0.5              |
| H52E        | 0.5              | H52F        | 0.5              | C53         | 0.5              |
| H53A        | 0.5              | H53B        | 0.5              | H53C        | 0.5              |
| C54         | 0.5              | H54A        | 0.5              | H54B        | 0.5              |
| C55         | 0.5              | H55A        | 0.5              | H55B        | 0.5              |
| C56         | 0.5              | H56A        | 0.5              | H56B        | 0.5              |
| C57         | 0.5              | H57A        | 0.5              | H57B        | 0.5              |
| C58         | 0.5              | H58A        | 0.5              | H58B        | 0.5              |
| C59         | 0.5              | H59A        | 0.5              | H59B        | 0.5              |
| H59C        | 0.5              | C53A        | 0.5              | H53D        | 0.5              |

|      |     |      |     |      |     |
|------|-----|------|-----|------|-----|
| H53E | 0.5 | H53F | 0.5 | C54A | 0.5 |
| H54C | 0.5 | H54D | 0.5 | C55A | 0.5 |
| H55C | 0.5 | H55D | 0.5 | C56A | 0.5 |
| H56C | 0.5 | H56D | 0.5 | C57A | 0.5 |
| H57C | 0.5 | H57D | 0.5 | C58A | 0.5 |
| H58C | 0.5 | H58D | 0.5 | C59A | 0.5 |
| H59D | 0.5 | H59E | 0.5 | H59F | 0.5 |

## Crystallographic Experimental Section for Compound *rac*-3a

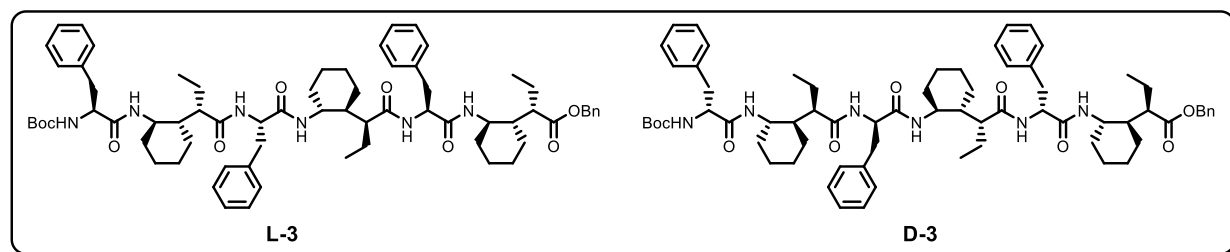

### Data Collection

A colorless crystal with approximate dimensions 0.4 x 0.3 x 0.2 mm<sup>3</sup> was selected under oil under ambient conditions and attached to the tip of a MiTeGen MicroMount<sup>®</sup>. The crystal was mounted in a stream of cold nitrogen at 100(1) K and centered in the X-ray beam by using a video camera.

The crystal evaluation and data collection were performed on a Bruker SMART APEXII diffractometer with Cu K<sub>α</sub> ( $\lambda = 1.54178 \text{ \AA}$ ) radiation and the diffractometer to crystal distance of 4.03 cm.

The initial cell constants were obtained from three series of  $\omega$  scans at different starting angles. Each series consisted of 50 frames collected at intervals of 0.5° in a 25° range about  $\omega$  with the exposure time of 10 seconds per frame. The reflections were successfully indexed by an automated indexing routine built in the APEXII program. The final cell constants were calculated from a set of 9746 strong reflections from the actual data collection.

The data were collected by using the full sphere data collection routine to survey the reciprocal space to the extent of a full sphere to a resolution of 0.83 Å. A total of 136346 data were harvested by collecting 19 sets of frames with 06 scans in  $\omega$  and  $\phi$  with an exposure time 20-60 sec per frame. These highly redundant datasets were corrected for Lorentz and polarization effects. The absorption correction was based on fitting a function to the empirical transmission surface as sampled by multiple equivalent measurements. [1]

### Structure Solution and Refinement

The systematic absences in the diffraction data were consistent for the space groups *P2/c* and *Pc*. The *E*-statistics strongly suggested the centrosymmetric space group *P2/c* that yielded chemically reasonable and computationally stable results of refinement [2-4].

A successful solution by the direct methods provided most non-hydrogen atoms from the *E*-map. The remaining non-hydrogen atoms were located in an alternating series of least-squares cycles and difference Fourier maps. All non-hydrogen atoms except those of the smallest disordered component of phenyl ring C64B were refined with anisotropic displacement coefficients. All hydrogen atoms were

included in the structure factor calculation at idealized positions and were allowed to ride on the neighboring atoms with relative isotropic displacement coefficients.

The asymmetric unit consists of one molecule of the foldamer shown in Figure 1, one fully occupied chloroform molecule, one fully occupied water molecule, as well as disordered chloroform and water molecules. Three of the phenyl groups in the foldamer exhibit positional disorder. Phenyl group C27 is disordered over two positions (major component: 51.6(15)%); phenyl group C46, over two positions (major component: 54.3(5)%); and phenyl group C64, over three positions (components: 45.0(2)%, 44.2(3)%, 10.9(3)%). Bond distance restraints and constraints as well as thermal parameter restraints were used to facilitate a chemically reasonable and computationally stable refinement.

The foldamer's conformation is stabilized by the presence of discrete hydrogen bonds between N-H and O atoms of alternating amide groups (e.g. the amide group N1 forms a hydrogen bond with amide group N3). Amide groups N4 and N6 are bridged by hydrogen bonds with the ordered water solvent molecule. This intramolecular hydrogen bonding motif is propagated in the intermolecular interactions. The penultimate amide group forms a hydrogen bond with the first amide group, and the last amide group forms a hydrogen bond with the second amide group of adjacent molecules.

A significant amount of time was invested in identifying and refining the disordered molecules chloroform and water molecules. Bond length restraints and constraints were applied to model the molecules but the resulting isotropic displacement coefficients suggested the molecules were mobile. In addition, the refinement was computationally unstable. Option SQUEEZE of program PLATON [6] was used to correct the diffraction data for diffuse scattering effects and to identify the solvate molecules. PLATON calculated the upper limit of volume that can be occupied by the solvent to be 1926 Å<sup>3</sup>, or 23.3% of the unit cell volume. The program calculated 550 electrons in the unit cell for the diffuse species. The positions of two disordered, partially occupied chloroform molecules and four disordered, partially occupied water molecules were identified, but the exact composition of the disordered solvents could not be determined. It is very likely that these solvate molecules are disordered over several positions, forming hydrogen bonds. Please note that all derived results in the following tables are based on the known contents. No data are given for the diffusely scattering species.

The final least-squares refinement of 937 parameters against 14871 data resulted in residuals  $R$  (based on  $F^2$  for  $I \geq 2\sigma$ ) and  $wR$  (based on  $F^2$  for all data) of 0.0631 and 0.1764, respectively. The final difference Fourier map contained one peak  $\sim 1.8 e^-/\text{Å}^3$ . This was in the vicinity of the disordered phenyl ring C64, and was interpreted as noise.

## Summary

**Crystal Data** for C<sub>70</sub>H<sub>97</sub>Cl<sub>3</sub>N<sub>6</sub>O<sub>10</sub> ( $M = 1288.88$ ): monoclinic, space group  $P2/c$  (no. 13),  $a = 22.772(3)$  Å,  $b = 14.5752(11)$  Å,  $c = 25.663(3)$  Å,  $\beta = 103.502(13)^\circ$ ,  $V = 8282.1(16)$  Å<sup>3</sup>,  $Z = 4$ ,  $T = 100.0$  K,  $\mu(\text{CuK}\alpha) = 1.408$  mm<sup>-1</sup>,  $D_{\text{calc}} = 1.034$  g/mm<sup>3</sup>, 136346 reflections measured ( $3.99 \leq 2\theta \leq 136.812$ ), 14871 unique ( $R_{\text{int}} = 0.0387$ ,  $R_{\text{sigma}} = 0.0194$ ) which were used in all calculations. The final  $R_1$  was 0.0631 ( $I > 2\sigma(I)$ ) and  $wR_2$  was 0.1764 (all data).

## References

- [1] Bruker-AXS. (2007-2014) APEX2 (Ver. 2014.1-1), SADABS (2012-1), and SAINT+ (Ver. 8.32A) Software Reference Manuals. Bruker-AXS, Madison, Wisconsin, USA.
- [2] Sheldrick, G. M. (2008) SHELXL. *Acta Cryst.* **A64**, 112-122.

- [3] Dolomanov, O.V.; Bourhis, L.J.; Gildea, R.J.; Howard, J.A.K.; Puschmann, H. "OLEX2: a complete structure solution, refinement and analysis program". *J. Appl. Cryst.* (2009) **42**, 339-341.
- [4] Guzei, I.A. (2013). Internal laboratory computer programs Gn.
- [5] Guzei, I. A. (2014). *J. Appl. Cryst.* **47**, 806-809.
- [6] A.L. Spek (1990) *Acta Cryst.* **A46**, C34.

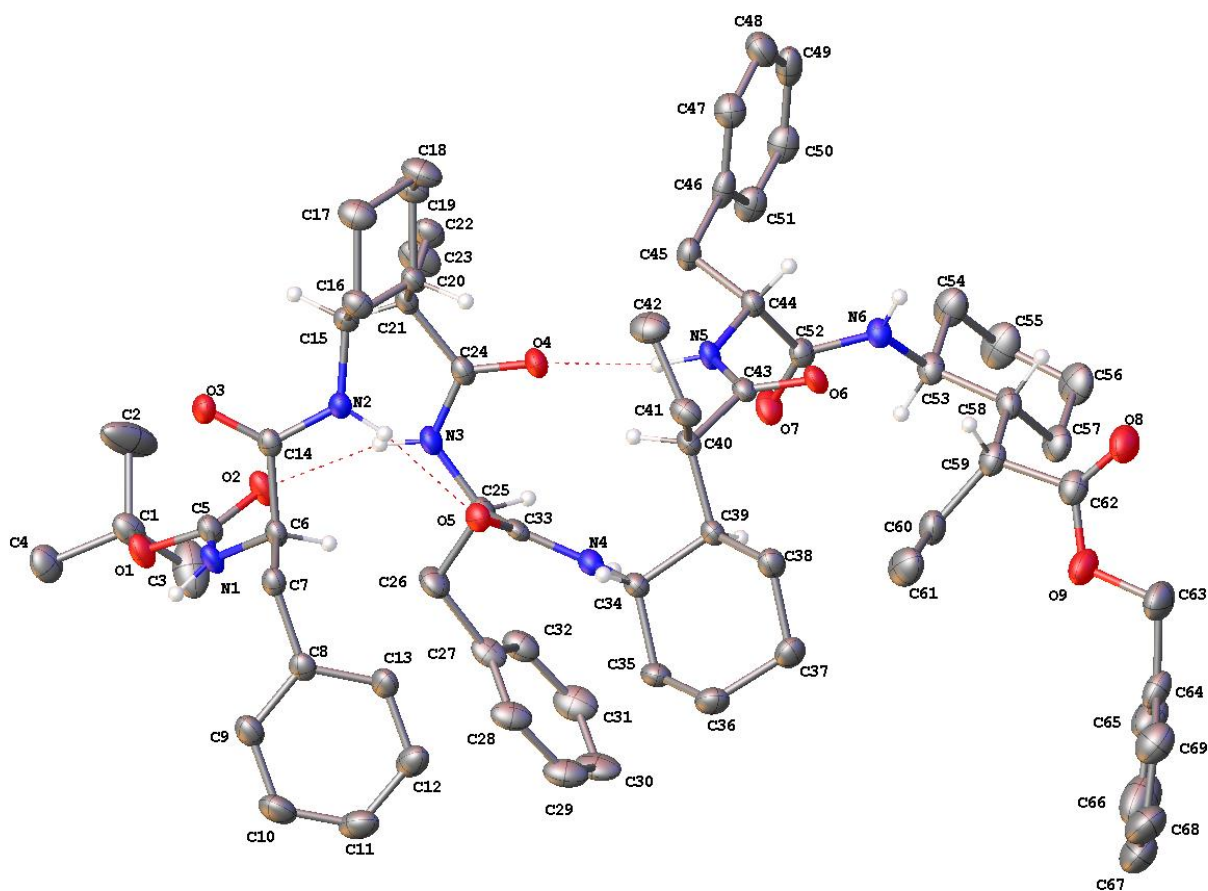

**Figure S33.** A molecular drawing of the foldamer of Gellman156 shown with 40% probability ellipsoids. All H atoms except those on heteroatoms and chiral carbons as well as all disordered components are omitted for clarity.

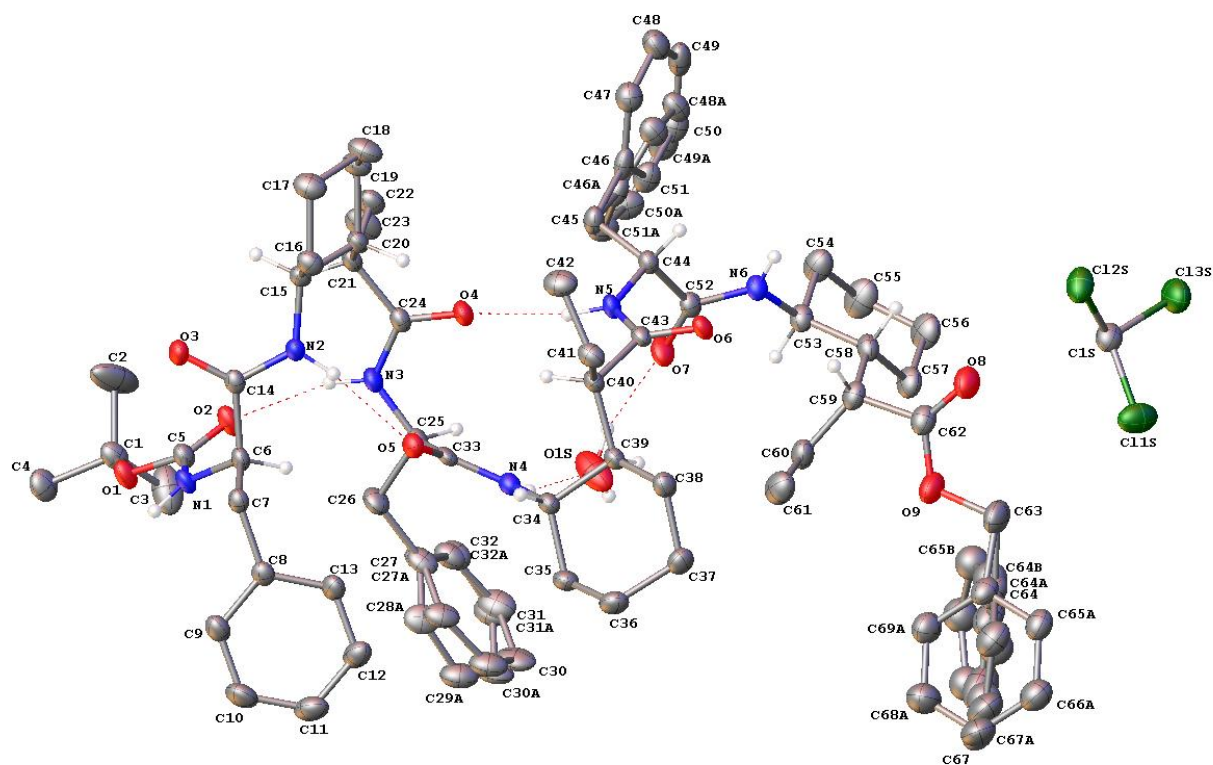

**Figure S34.** The asymmetric unit of Gellman156, including all disordered components. All atoms are drawn as 35% thermal probability ellipsoids. All H atoms except those on heteroatoms and chiral carbons are omitted for clarity.

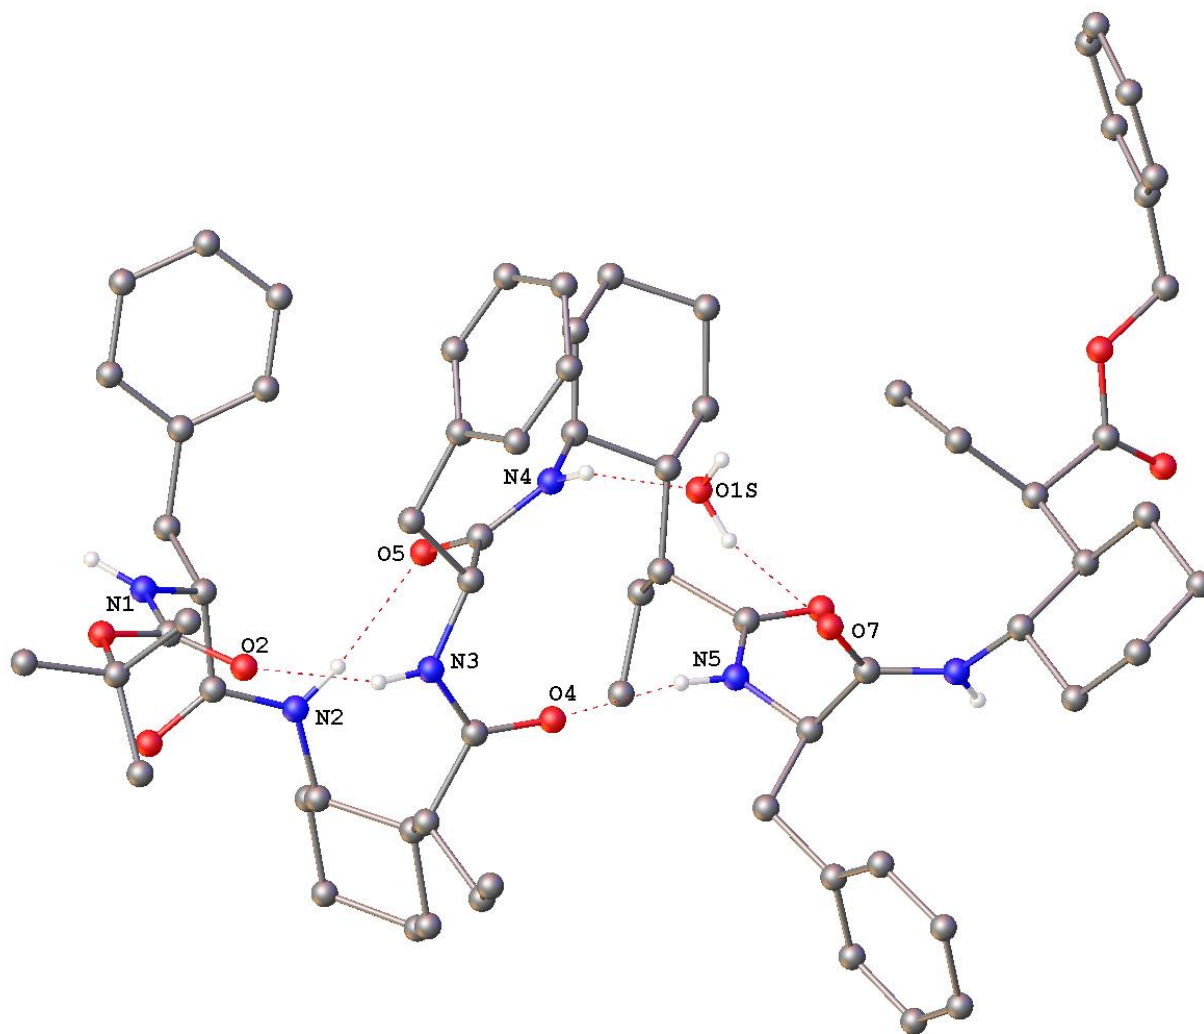

**Figure S35.** A packing diagram of Gellman156, illustrating the intramolecular hydrogen bonds. All H atoms except those on heteroatoms as well as disordered components are omitted for clarity.

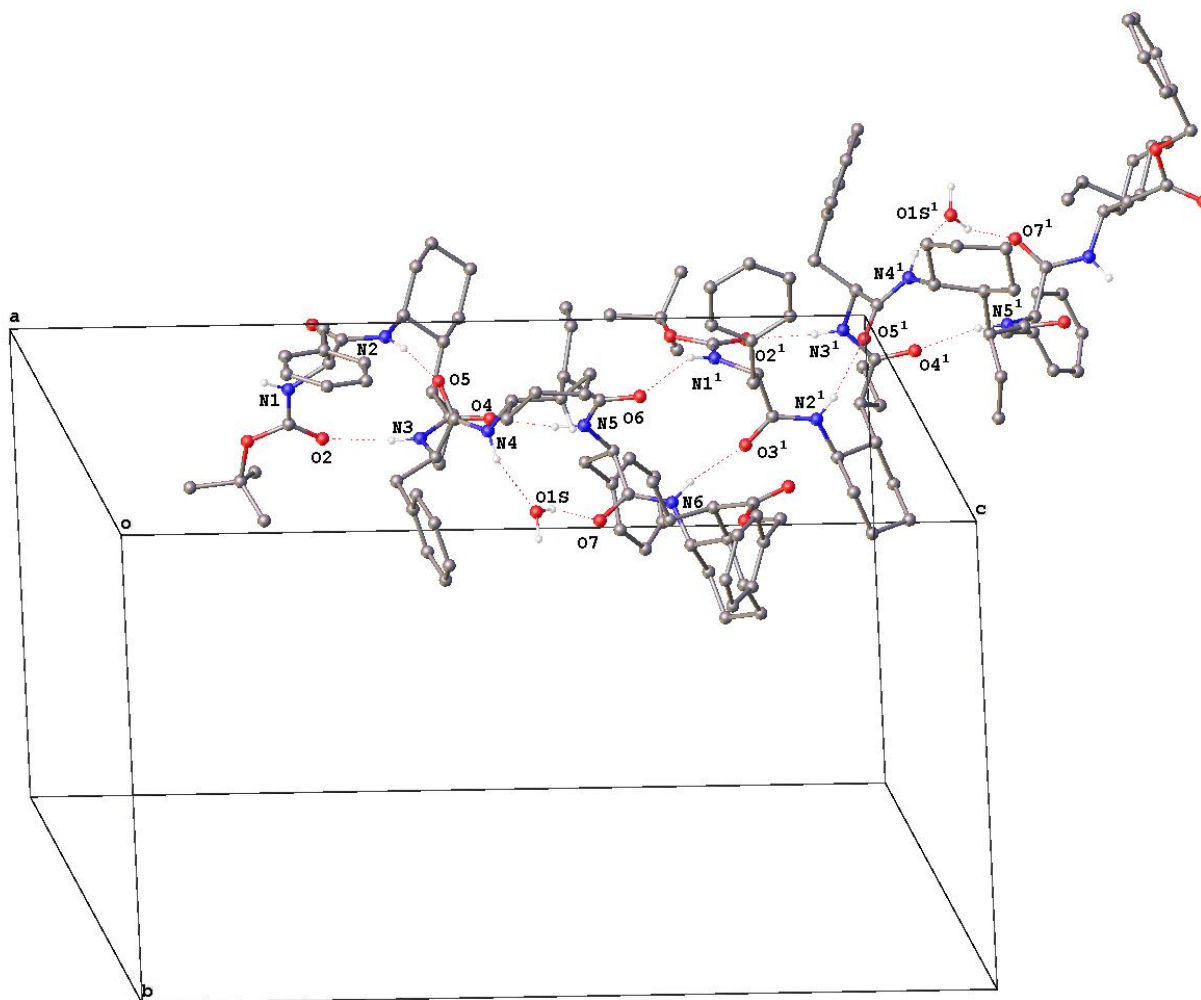

**Figure S36.** A packing diagram of Gellman156, illustrating the intermolecular hydrogen bonds. All H atoms except those on heteroatoms as well as disordered components are omitted for clarity.



| <b>Table S58.</b> Crystal data and structure refinement for gellman156_sq. |                                                                                                      |
|----------------------------------------------------------------------------|------------------------------------------------------------------------------------------------------|
| <b>Identification code</b>                                                 | gellman156_sq                                                                                        |
| <b>Empirical formula</b>                                                   | C <sub>69</sub> H <sub>94</sub> N <sub>6</sub> O <sub>9</sub> , CHCl <sub>3</sub> , H <sub>2</sub> O |
| <b>Formula weight</b>                                                      | 1288.88                                                                                              |
| <b>Temperature/K</b>                                                       | 100.0                                                                                                |
| <b>Crystal system</b>                                                      | monoclinic                                                                                           |
| <b>Space group</b>                                                         | <i>P2/c</i>                                                                                          |
| <b>a/Å</b>                                                                 | 22.772(3)                                                                                            |
| <b>b/Å</b>                                                                 | 14.5752(11)                                                                                          |
| <b>c/Å</b>                                                                 | 25.663(3)                                                                                            |
| <b>α/°</b>                                                                 | 90                                                                                                   |
| <b>β/°</b>                                                                 | 103.502(13)                                                                                          |
| <b>γ/°</b>                                                                 | 90                                                                                                   |
| <b>Volume/Å<sup>3</sup></b>                                                | 8282.1(16)                                                                                           |
| <b>Z</b>                                                                   | 4                                                                                                    |
| <b>ρ<sub>calc</sub>/mm<sup>3</sup></b>                                     | 1.034                                                                                                |
| <b>μ/mm<sup>-1</sup></b>                                                   | 1.408                                                                                                |
| <b>F(000)</b>                                                              | 2760.0                                                                                               |
| <b>Crystal size/mm<sup>3</sup></b>                                         | 0.4 × 0.3 × 0.2                                                                                      |
| <b>Radiation</b>                                                           | CuKα (λ = 1.54178)                                                                                   |
| <b>2θ range for data collection</b>                                        | 3.99 to 136.812°                                                                                     |
| <b>Index ranges</b>                                                        | -27 ≤ h ≤ 26, -17 ≤ k ≤ 17, -30 ≤ l ≤ 30                                                             |
| <b>Reflections collected</b>                                               | 136346                                                                                               |
| <b>Independent reflections</b>                                             | 14871 [R <sub>int</sub> = 0.0387, R <sub>sigma</sub> = 0.0194]                                       |
| <b>Data/restraints/parameters</b>                                          | 14871/357/937                                                                                        |
| <b>Goodness-of-fit on F<sup>2</sup></b>                                    | 1.034                                                                                                |
| <b>Final R indexes [I ≥ 2σ (I)]</b>                                        | R <sub>1</sub> = 0.0631, wR <sub>2</sub> = 0.1680                                                    |
| <b>Final R indexes [all data]</b>                                          | R <sub>1</sub> = 0.0732, wR <sub>2</sub> = 0.1764                                                    |
| <b>Largest diff. peak/hole / e Å<sup>-3</sup></b>                          | 1.86/-0.61                                                                                           |

| <b>Table S59.</b> Fractional Atomic Coordinates (×10 <sup>4</sup> ) and Equivalent Isotropic Displacement Parameters (Å <sup>2</sup> ×10 <sup>3</sup> ) for gellman156_sq. U <sub>eq</sub> is defined as 1/3 of of the trace of the orthogonalised U <sub>ij</sub> tensor. |            |             |           |              |
|----------------------------------------------------------------------------------------------------------------------------------------------------------------------------------------------------------------------------------------------------------------------------|------------|-------------|-----------|--------------|
| <b>Atom</b>                                                                                                                                                                                                                                                                | <b>x</b>   | <b>y</b>    | <b>z</b>  | <b>U(eq)</b> |
| O1                                                                                                                                                                                                                                                                         | 6777.2(8)  | 1052.5(13)  | 2334.6(7) | 35.1(4)      |
| O2                                                                                                                                                                                                                                                                         | 6709.0(8)  | 989.9(14)   | 3205.3(7) | 36.6(4)      |
| O3                                                                                                                                                                                                                                                                         | 6905.2(8)  | -1357.4(13) | 3171.2(7) | 32.6(4)      |
| O4                                                                                                                                                                                                                                                                         | 6780.9(8)  | 650.2(13)   | 5185.7(6) | 33.7(4)      |
| O5                                                                                                                                                                                                                                                                         | 8003.3(8)  | 376.3(12)   | 4745.4(7) | 30.7(4)      |
| O6                                                                                                                                                                                                                                                                         | 7887.2(8)  | 721.3(12)   | 7080.8(6) | 30.5(4)      |
| O7                                                                                                                                                                                                                                                                         | 6938.4(10) | 2934.1(13)  | 6435.1(7) | 40.2(5)      |
| O8                                                                                                                                                                                                                                                                         | 8499.1(10) | 2970.7(15)  | 8842.4(8) | 51.3(5)      |
| O9                                                                                                                                                                                                                                                                         | 8967.2(10) | 3892.2(15)  | 8369.2(8) | 48.3(5)      |
| N1                                                                                                                                                                                                                                                                         | 7458.6(9)  | 260.6(15)   | 2923.2(8) | 28.1(4)      |
| N2                                                                                                                                                                                                                                                                         | 7176.9(9)  | -955.5(14)  | 4047.7(8) | 26.3(4)      |
| N3                                                                                                                                                                                                                                                                         | 6863(1)    | 1083.4(14)  | 4365.9(8) | 29.1(4)      |

|      |            |             |            |          |
|------|------------|-------------|------------|----------|
| N4   | 8237.2(9)  | 1563.4(14)  | 5326.9(8)  | 27.8(4)  |
| N5   | 7172.2(9)  | 1005.2(14)  | 6327.6(8)  | 27.5(4)  |
| N6   | 6880.4(9)  | 2552.3(14)  | 7278.8(8)  | 28.7(4)  |
| C1   | 6260.9(12) | 1673(2)     | 2169.3(11) | 38.0(6)  |
| C2   | 5701.5(16) | 1234(4)     | 2276.0(19) | 91.0(17) |
| C3   | 6399(2)    | 2583(3)     | 2445.2(15) | 77.5(13) |
| C4   | 6212.4(14) | 1767(2)     | 1571.5(11) | 46.2(7)  |
| C5   | 6960.2(11) | 779.5(18)   | 2850.5(10) | 30.4(5)  |
| C6   | 7674.1(10) | -191.1(16)  | 3437.3(9)  | 25.3(5)  |
| C7   | 8288.2(11) | -649.7(17)  | 3460.9(9)  | 27.2(5)  |
| C8   | 8797.6(11) | 27.4(17)    | 3519.4(10) | 28.7(5)  |
| C9   | 9042.2(12) | 259(2)      | 3091.4(11) | 38.6(6)  |
| C10  | 9529.7(14) | 855(2)      | 3159.1(13) | 50.0(8)  |
| C11  | 9774.7(14) | 1236(2)     | 3654.2(15) | 52.1(8)  |
| C12  | 9529.9(13) | 1023(2)     | 4083.4(13) | 44.3(7)  |
| C13  | 9044.4(12) | 429.4(19)   | 4016.0(11) | 34.8(6)  |
| C14  | 7212.2(10) | -894.4(16)  | 3537.2(9)  | 25.9(5)  |
| C15  | 6764.3(11) | -1591.1(17) | 4222.2(10) | 27.6(5)  |
| C16  | 7085.5(12) | -2486.4(18) | 4432.2(11) | 34.1(6)  |
| C17  | 6642.6(14) | -3170(2)    | 4573.8(13) | 43.0(7)  |
| C18  | 6327.8(15) | -2753(2)    | 4977.8(13) | 46.1(7)  |
| C19  | 6019.4(13) | -1847.5(19) | 4776.0(12) | 37.2(6)  |
| C20  | 6465.6(11) | -1151.5(17) | 4640.3(9)  | 27.5(5)  |
| C21  | 6185.5(11) | -197.0(18)  | 4450.1(9)  | 28.4(5)  |
| C22  | 5588.3(12) | 25(2)       | 4603.5(11) | 36.4(6)  |
| C23  | 5342.1(14) | 963(2)      | 4395.3(14) | 51.8(8)  |
| C24  | 6633.1(11) | 545.1(17)   | 4694.6(9)  | 28.0(5)  |
| C25  | 7352.4(12) | 1706.0(17)  | 4594.7(9)  | 29.5(5)  |
| C26  | 7519.3(14) | 2282.8(19)  | 4147.9(11) | 39.5(6)  |
| C27  | 7875(4)    | 3149(4)     | 4341(4)    | 36.8(18) |
| C28  | 8480(4)    | 3141(3)     | 4322(4)    | 44.6(17) |
| C29  | 8836(3)    | 3912(4)     | 4478(5)    | 51.4(17) |
| C30  | 8588(3)    | 4692(4)     | 4653(4)    | 53.9(18) |
| C31  | 7983(3)    | 4701(5)     | 4671(4)    | 52.4(18) |
| C32  | 7626(3)    | 3929(6)     | 4515(5)    | 43.2(18) |
| C27A | 7942(4)    | 3076(5)     | 4372(4)    | 34.8(18) |
| C28A | 8569(4)    | 3049(4)     | 4497(4)    | 42.8(17) |
| C29A | 8899(3)    | 3803(5)     | 4735(4)    | 50.6(17) |
| C30A | 8602(3)    | 4585(4)     | 4847(4)    | 51.4(18) |
| C31A | 7975(3)    | 4612(5)     | 4723(4)    | 52.9(19) |
| C32A | 7644(3)    | 3858(7)     | 4485(5)    | 41.2(18) |
| C33  | 7896.5(11) | 1145.4(17)  | 4901.0(9)  | 27.0(5)  |
| C34  | 8775.3(11) | 1169.6(17)  | 5685.3(9)  | 28.1(5)  |
| C35  | 9318.0(12) | 1790(2)     | 5685.8(11) | 36.6(6)  |
| C36  | 9878.1(12) | 1487(2)     | 6100.3(12) | 41.6(7)  |
| C37  | 9748.2(12) | 1484(2)     | 6657.8(11) | 39.6(6)  |
| C38  | 9228.9(12) | 829(2)      | 6667.8(10) | 34.8(6)  |
| C39  | 8652.4(11) | 1067.0(17)  | 6248.7(9)  | 26.9(5)  |
| C40  | 8121.4(11) | 382.7(17)   | 6227.2(9)  | 27.0(5)  |
| C41  | 8309.4(12) | -613.3(18)  | 6361.9(11) | 34.6(6)  |
| C42  | 7761.1(14) | -1251(2)    | 6246.9(14) | 47.0(7)  |

|      |             |            |             |          |
|------|-------------|------------|-------------|----------|
| C43  | 7720.8(11)  | 712.4(16)  | 6586.5(9)   | 25.1(5)  |
| C44  | 6726.0(11)  | 1359.4(17) | 6598.0(9)   | 26.5(5)  |
| C45  | 6103.9(12)  | 1313.0(19) | 6191.8(10)  | 33.4(6)  |
| C46  | 5571(2)     | 1543(6)    | 6432(3)     | 36.1(16) |
| C47  | 5244(2)     | 869(4)     | 6609(2)     | 42.8(14) |
| C48  | 4754(3)     | 1056(4)    | 6831(2)     | 49.0(15) |
| C49  | 4589(3)     | 1943(4)    | 6884(2)     | 46.4(15) |
| C50  | 4899(6)     | 2649(6)    | 6706(7)     | 43(3)    |
| C51  | 5382(2)     | 2449(4)    | 6480(2)     | 41.5(14) |
| C46A | 5632(3)     | 1955(5)    | 6311(3)     | 32.8(18) |
| C47A | 5292(3)     | 1720(5)    | 6664(2)     | 40.5(17) |
| C48A | 4865(7)     | 2334(8)    | 6772(8)     | 41(3)    |
| C49A | 4790(3)     | 3174(6)    | 6530(3)     | 47.0(18) |
| C50A | 5123(3)     | 3421(4)    | 6165(3)     | 46.9(18) |
| C51A | 5543(2)     | 2808(4)    | 6052(2)     | 39.8(16) |
| C52  | 6865.0(11)  | 2350.6(17) | 6770.1(9)   | 28.7(5)  |
| C53  | 6934.2(12)  | 3491.6(17) | 7485(1)     | 33.1(6)  |
| C54  | 6343.5(14)  | 3807(2)    | 7606.7(14)  | 49.8(8)  |
| C55  | 6385.6(16)  | 4808(3)    | 7786.8(16)  | 61.9(10) |
| C56  | 6910.6(16)  | 4958(2)    | 8262.6(14)  | 55.1(8)  |
| C57  | 7502.2(14)  | 4612.1(19) | 8150.9(12)  | 43.0(7)  |
| C58  | 7455.0(13)  | 3599.0(18) | 7983.6(10)  | 34.0(6)  |
| C59  | 8054.8(13)  | 3194.0(19) | 7901.6(11)  | 36.5(6)  |
| C60  | 8260.0(13)  | 3533(2)    | 7407.6(11)  | 41.2(6)  |
| C61  | 8769.5(16)  | 2944(3)    | 7289.5(15)  | 57.2(9)  |
| C62  | 8524.3(14)  | 3324.0(19) | 8423.1(11)  | 39.5(6)  |
| C63  | 9438.4(16)  | 4078(3)    | 8844.1(13)  | 57.7(9)  |
| C64  | 9997.8(16)  | 4341(3)    | 8665.8(17)  | 41.5(15) |
| C65  | 10520(2)    | 4422(3)    | 9071.1(13)  | 46.9(15) |
| C66  | 11045.4(17) | 4764(4)    | 8956.1(16)  | 58.9(17) |
| C67  | 11048.6(17) | 5025(5)    | 8435.9(18)  | 71(2)    |
| C68  | 10526(2)    | 4944(4)    | 8030.6(14)  | 67.5(18) |
| C69  | 10001.0(16) | 4602(4)    | 8145.6(15)  | 52.4(16) |
| C64A | 9876(2)     | 4747(3)    | 8691(2)     | 43.6(16) |
| C65A | 9685(2)     | 5618(3)    | 8505(2)     | 63(2)    |
| C66A | 10076(3)    | 6197(3)    | 8317(3)     | 95(3)    |
| C67A | 10656(3)    | 5905(5)    | 8316(3)     | 84(2)    |
| C68A | 10847(2)    | 5034(5)    | 8502(3)     | 79(2)    |
| C69A | 10457(2)    | 4455(3)    | 8689(3)     | 63.1(17) |
| C64B | 9659(10)    | 4948(10)   | 8632(10)    | 63(4)    |
| C65B | 9143(8)     | 5464(14)   | 8428(10)    | 63(4)    |
| C66B | 9189(9)     | 6306(13)   | 8186(9)     | 63(4)    |
| C67B | 9751(11)    | 6633(10)   | 8149(10)    | 63(4)    |
| C68B | 10267(8)    | 6118(12)   | 8353(10)    | 63(4)    |
| C69B | 10221(8)    | 5275(11)   | 8595(10)    | 63(4)    |
| CI1S | 9569.2(4)   | 2953.1(6)  | 10187.1(4)  | 61.5(2)  |
| CI2S | 8714.4(4)   | 1435.8(5)  | 10021.0(3)  | 51.3(2)  |
| CI3S | 8466.0(4)   | 3080.1(6)  | 10549.5(3)  | 60.6(2)  |
| C1S  | 8802.1(14)  | 2631(2)    | 10053.2(12) | 40.9(6)  |
| O1S  | 7762.8(17)  | 3096.0(16) | 5793.6(11)  | 74.3(8)  |

**Table S60.** Anisotropic Displacement Parameters ( $\text{\AA}^2 \times 10^3$ ) for gellman156\_sq. The Anisotropic displacement factor exponent takes the form:  $-2\pi^2[h^2a^2U_{11}+2hka*b*U_{12}+\dots]$ .

| Atom | U <sub>11</sub> | U <sub>22</sub> | U <sub>33</sub> | U <sub>23</sub> | U <sub>13</sub> | U <sub>12</sub> |
|------|-----------------|-----------------|-----------------|-----------------|-----------------|-----------------|
| O1   | 34.7(9)         | 49.3(11)        | 22.3(8)         | 7.2(8)          | 8.4(7)          | 11.1(8)         |
| O2   | 37.6(10)        | 49.9(11)        | 25.1(9)         | 3.7(8)          | 12.6(8)         | 13.9(8)         |
| O3   | 32.8(9)         | 41.6(10)        | 24.2(8)         | -8.0(7)         | 8.2(7)          | -3.1(8)         |
| O4   | 40.9(10)        | 42(1)           | 19.8(8)         | -2.2(7)         | 10.4(7)         | -5.2(8)         |
| O5   | 34.8(9)         | 33.1(9)         | 26.1(8)         | -5.3(7)         | 10.9(7)         | -0.6(7)         |
| O6   | 30.5(9)         | 43.7(10)        | 18.3(8)         | 3.3(7)          | 7.9(7)          | 1.1(7)          |
| O7   | 59.0(12)        | 35.2(10)        | 24.5(9)         | 6.5(7)          | 6.1(8)          | -1.7(9)         |
| O8   | 60.6(14)        | 54.5(13)        | 32.9(11)        | 4.9(9)          | -0.8(10)        | -8.4(10)        |
| O9   | 52.8(12)        | 50.0(12)        | 34.4(10)        | 1.1(9)          | -5.3(9)         | -10.9(10)       |
| N1   | 28.5(10)        | 39.3(12)        | 19.4(9)         | 1.3(8)          | 11.2(8)         | 5.1(9)          |
| N2   | 25.5(10)        | 33.3(11)        | 20.9(9)         | -3.3(8)         | 6.7(8)          | -1.9(8)         |
| N3   | 35.5(11)        | 34.2(11)        | 18.2(9)         | 1.7(8)          | 7.1(8)          | 0.3(9)          |
| N4   | 35.2(11)        | 25.8(10)        | 24.4(10)        | -0.1(8)         | 10.8(9)         | -3.5(8)         |
| N5   | 30.4(10)        | 35.9(11)        | 16.7(9)         | -0.9(8)         | 6.8(8)          | 2.0(9)          |
| N6   | 35.5(11)        | 26.5(10)        | 23.7(10)        | 0.3(8)          | 6.2(9)          | 2.0(8)          |
| C1   | 34.6(14)        | 46.2(16)        | 34.1(14)        | 11.8(12)        | 9.8(12)         | 11.0(12)        |
| C2   | 33.4(18)        | 151(5)          | 88(3)           | 64(3)           | 13.1(19)        | 6(2)            |
| C3   | 129(4)          | 50(2)           | 50(2)           | 4.0(17)         | 12(2)           | 27(2)           |
| C4   | 46.9(17)        | 55.6(18)        | 33.3(14)        | 12.9(13)        | 4.0(13)         | 11.1(14)        |
| C5   | 31.1(13)        | 38.1(14)        | 22.9(12)        | 2(1)            | 8.1(10)         | 1.9(10)         |
| C6   | 27.2(12)        | 31.3(12)        | 18.4(10)        | -2.3(9)         | 7.3(9)          | 2.2(9)          |
| C7   | 27.1(12)        | 32.3(13)        | 22.8(11)        | -2.5(9)         | 6.6(10)         | 3.4(10)         |
| C8   | 24.4(11)        | 34.5(13)        | 28.5(12)        | -1.2(10)        | 8.8(10)         | 5.3(10)         |
| C9   | 34.7(14)        | 52.8(17)        | 30.9(13)        | -0.9(12)        | 12.6(12)        | 2.0(12)         |
| C10  | 43.3(16)        | 64(2)           | 51.1(18)        | 3.5(15)         | 27.4(15)        | -4.4(15)        |
| C11  | 38.5(16)        | 53.8(19)        | 69(2)           | -9.5(16)        | 23.5(16)        | -11.2(14)       |
| C12  | 32.3(14)        | 51.6(18)        | 50.5(17)        | -16.5(14)       | 13.0(13)        | -5.9(12)        |
| C13  | 31.8(13)        | 44.3(15)        | 31.2(13)        | -7.6(11)        | 13.1(11)        | -0.2(11)        |
| C14  | 25.0(11)        | 30.6(12)        | 22.8(11)        | -1.5(9)         | 7.2(10)         | 6.0(9)          |
| C15  | 25.3(12)        | 33.7(13)        | 25.4(12)        | -1.2(10)        | 8.9(10)         | -2(1)           |
| C16  | 32.1(13)        | 37.5(14)        | 35.2(13)        | 2.9(11)         | 12.8(11)        | 4.2(11)         |
| C17  | 46.8(16)        | 33.3(14)        | 53.1(17)        | 8.4(13)         | 20.2(14)        | 3.2(12)         |
| C18  | 49.4(17)        | 41.5(16)        | 55.1(18)        | 11.7(14)        | 28.0(15)        | 1.3(13)         |
| C19  | 36.7(14)        | 38.0(14)        | 42.2(15)        | 2.9(12)         | 20.0(12)        | -0.2(11)        |
| C20  | 25.7(11)        | 35.8(13)        | 22.0(11)        | 1.3(10)         | 7.8(10)         | 0(1)            |
| C21  | 26.8(12)        | 39.4(14)        | 20.6(11)        | -0.2(10)        | 8.7(10)         | 1.7(10)         |
| C22  | 29.9(13)        | 45.4(16)        | 36.8(14)        | 1.2(12)         | 13.8(11)        | 4.0(11)         |
| C23  | 42.4(16)        | 59(2)           | 61(2)           | 12.0(16)        | 25.6(15)        | 20.5(15)        |
| C24  | 29.2(12)        | 34.6(13)        | 21.6(11)        | 0.3(10)         | 8.6(10)         | 4.5(10)         |
| C25  | 38.2(14)        | 29.7(13)        | 22.8(11)        | 1.1(10)         | 11.5(11)        | -0.5(10)        |
| C26  | 53.5(17)        | 36.6(15)        | 30.8(13)        | 8.1(11)         | 14.5(13)        | -2.1(12)        |
| C27  | 38(3)           | 35(3)           | 39(3)           | 18(3)           | 13(3)           | 4(3)            |
| C28  | 44(3)           | 29(3)           | 62(4)           | 17(3)           | 13(3)           | 14(2)           |
| C29  | 47(3)           | 40(3)           | 71(4)           | 15(3)           | 22(3)           | -1(2)           |
| C30  | 64(3)           | 35(3)           | 72(4)           | 14(3)           | 35(3)           | -7(3)           |
| C31  | 63(3)           | 30(3)           | 71(3)           | 8(3)            | 30(3)           | 2(3)            |

|      |          |          |          |           |          |           |
|------|----------|----------|----------|-----------|----------|-----------|
| C32  | 50(3)    | 36(3)    | 48(3)    | 6(3)      | 20(3)    | 8(3)      |
| C27A | 45(3)    | 24(3)    | 40(3)    | 13(3)     | 18(3)    | 10(3)     |
| C28A | 42(3)    | 33(3)    | 57(4)    | 18(3)     | 19(3)    | 5(3)      |
| C29A | 49(3)    | 38(3)    | 71(4)    | 16(3)     | 26(3)    | -1(3)     |
| C30A | 60(3)    | 28(3)    | 75(4)    | 15(3)     | 33(3)    | -5(2)     |
| C31A | 65(3)    | 29(3)    | 72(4)    | 9(3)      | 30(3)    | 8(3)      |
| C32A | 46(3)    | 36(3)    | 47(3)    | 9(3)      | 22(3)    | 7(3)      |
| C33  | 32.0(12) | 31.3(13) | 21.9(11) | 3.2(10)   | 14.7(10) | -4.9(10)  |
| C34  | 30.9(12) | 31.5(13) | 24.3(12) | 0.1(10)   | 11(1)    | -4.1(10)  |
| C35  | 35.5(14) | 42.3(15) | 35.4(14) | -0.3(12)  | 15.2(12) | -11.4(12) |
| C36  | 30.0(13) | 49.1(17) | 48.1(16) | -2.8(13)  | 13.7(13) | -7.6(12)  |
| C37  | 29.6(13) | 49.9(17) | 37.1(15) | -3.3(12)  | 3.4(12)  | -3.6(12)  |
| C38  | 30.9(13) | 45.4(15) | 28.1(12) | 1.5(11)   | 7.0(11)  | 0.8(11)   |
| C39  | 28.6(12) | 31.4(12) | 22.6(11) | -1.2(9)   | 9.7(10)  | -1.3(10)  |
| C40  | 30.5(12) | 31.3(13) | 21.1(11) | 0.8(9)    | 10(1)    | -1.5(10)  |
| C41  | 39.0(14) | 32.1(13) | 36.5(14) | 2.4(11)   | 16.7(12) | 2.2(11)   |
| C42  | 50.8(17) | 31.4(14) | 63(2)    | 0.1(13)   | 21.2(15) | -4.1(13)  |
| C43  | 30.9(12) | 24.4(11) | 21.5(11) | 1.6(9)    | 9.6(10)  | -3.1(9)   |
| C44  | 28.1(12) | 30.6(12) | 21.5(11) | -0.5(9)   | 7(1)     | 1.2(10)   |
| C45  | 32.3(13) | 40.6(14) | 25.7(12) | -7.2(11)  | 3.3(11)  | 2.9(11)   |
| C46  | 32(3)    | 43(4)    | 27(3)    | -11(3)    | -6(3)    | 11(3)     |
| C47  | 45(3)    | 44(3)    | 39(3)    | -1(2)     | 9(2)     | 3(2)      |
| C48  | 50(3)    | 63(4)    | 36(3)    | 3(3)      | 13(3)    | -1(3)     |
| C49  | 37(3)    | 68(4)    | 32(3)    | -12(3)    | 2(3)     | 8(3)      |
| C50  | 39(4)    | 44(7)    | 42(6)    | -4(6)     | 2(3)     | 11(5)     |
| C51  | 34(3)    | 44(3)    | 43(3)    | -4(3)     | 3(2)     | 7(2)      |
| C46A | 28(3)    | 33(4)    | 32(4)    | -10(3)    | -4(3)    | 3(3)      |
| C47A | 35(3)    | 47(4)    | 38(3)    | 5(3)      | 7(3)     | 8(3)      |
| C48A | 36(5)    | 54(9)    | 33(5)    | 7(7)      | 10(4)    | 10(7)     |
| C49A | 38(4)    | 50(5)    | 50(4)    | -6(4)     | 4(3)     | 8(3)      |
| C50A | 36(3)    | 41(4)    | 63(4)    | 6(3)      | 9(3)     | 8(3)      |
| C51A | 29(3)    | 41(3)    | 46(4)    | 8(3)      | 4(3)     | 0(2)      |
| C52  | 29.3(12) | 32.4(13) | 22.7(11) | 2.3(10)   | 2.9(10)  | 3.7(10)   |
| C53  | 41.4(14) | 27.2(13) | 30.0(13) | -1.1(10)  | 6.6(11)  | 2.5(11)   |
| C54  | 43.1(16) | 51.3(18) | 54.6(18) | -15.3(15) | 10.6(15) | 6.6(14)   |
| C55  | 56(2)    | 53(2)    | 74(2)    | -21.8(18) | 11.3(18) | 16.5(16)  |
| C56  | 64(2)    | 44.7(18) | 58(2)    | -19.7(15) | 15.7(17) | 4.4(15)   |
| C57  | 55.2(18) | 34.3(15) | 39.2(15) | -10.8(12) | 10.3(13) | -0.9(13)  |
| C58  | 46.1(15) | 29.9(13) | 26.2(12) | -2.8(10)  | 8.9(11)  | -1.5(11)  |
| C59  | 41.1(15) | 32.4(13) | 33.0(14) | -6.5(11)  | 2.9(12)  | -0.6(11)  |
| C60  | 40.5(15) | 50.1(17) | 31.3(14) | -8.8(12)  | 5.1(12)  | -1.5(13)  |
| C61  | 53.9(19) | 61(2)    | 60(2)    | -23.4(17) | 18.9(17) | -3.6(16)  |
| C62  | 46.4(16) | 33.3(14) | 35.3(15) | -1.0(12)  | 2.5(13)  | 0.7(12)   |
| C63  | 58(2)    | 69(2)    | 37.3(16) | 1.4(15)   | -6.1(15) | -13.1(17) |
| C64  | 47(3)    | 32(3)    | 42(3)    | 0(3)      | 3(3)     | -7(3)     |
| C65  | 53(3)    | 43(3)    | 42(3)    | -4(3)     | 4(3)     | -5(3)     |
| C66  | 53(3)    | 60(4)    | 61(4)    | -9(3)     | 10(3)    | -10(3)    |
| C67  | 57(4)    | 88(4)    | 70(4)    | -10(4)    | 17(4)    | -31(4)    |
| C68  | 59(4)    | 85(4)    | 61(4)    | 1(3)      | 20(3)    | -15(3)    |
| C69  | 49(3)    | 58(3)    | 46(3)    | 2(3)      | 3(3)     | -5(3)     |
| C64A | 45(3)    | 38(3)    | 38(3)    | -5(3)     | -9(3)    | -2(3)     |

|      |          |          |          |          |          |          |
|------|----------|----------|----------|----------|----------|----------|
| C65A | 72(5)    | 50(4)    | 57(4)    | 0(3)     | -4(4)    | -20(3)   |
| C66A | 113(6)   | 84(5)    | 70(5)    | 3(4)     | -15(5)   | -22(5)   |
| C67A | 85(4)    | 99(5)    | 64(4)    | -20(4)   | 11(4)    | -43(4)   |
| C68A | 62(4)    | 95(4)    | 76(4)    | -21(4)   | 11(4)    | -32(4)   |
| C69A | 61(3)    | 57(3)    | 66(3)    | -10(3)   | 6(3)     | -7(3)    |
| C11S | 41.8(4)  | 63.6(5)  | 73.2(6)  | 23.3(4)  | 1.3(4)   | -1.4(4)  |
| C12S | 74.9(5)  | 33.9(4)  | 40.6(4)  | -0.1(3)  | 4.5(4)   | 0.4(3)   |
| C13S | 77.0(6)  | 55.8(5)  | 52.9(5)  | -15.9(4) | 22.9(4)  | -9.0(4)  |
| C1S  | 47.4(16) | 36.6(15) | 36.8(14) | 2.7(12)  | 5.9(13)  | -0.4(12) |
| O1S  | 133(3)   | 37.0(12) | 68.7(17) | 4.6(12)  | 56.1(18) | 7.1(14)  |

**Table S61.** Bond Lengths for gellman156\_sq.

| Atom | Atom | Length/Å | Atom | Atom | Length/Å |
|------|------|----------|------|------|----------|
| O1   | C1   | 1.465(3) | C34  | C35  | 1.531(3) |
| O1   | C5   | 1.352(3) | C34  | C39  | 1.543(3) |
| O2   | C5   | 1.222(3) | C35  | C36  | 1.523(4) |
| O3   | C14  | 1.233(3) | C36  | C37  | 1.527(4) |
| O4   | C24  | 1.236(3) | C37  | C38  | 1.524(4) |
| O5   | C33  | 1.233(3) | C38  | C39  | 1.530(3) |
| O6   | C43  | 1.236(3) | C39  | C40  | 1.558(3) |
| O7   | C52  | 1.248(3) | C40  | C41  | 1.530(3) |
| O8   | C62  | 1.206(4) | C40  | C43  | 1.519(3) |
| O9   | C62  | 1.337(4) | C41  | C42  | 1.529(4) |
| O9   | C63  | 1.449(4) | C44  | C45  | 1.552(3) |
| N1   | C5   | 1.340(3) | C44  | C52  | 1.522(3) |
| N1   | C6   | 1.453(3) | C45  | C46  | 1.522(5) |
| N2   | C14  | 1.334(3) | C45  | C46A | 1.510(5) |
| N2   | C15  | 1.462(3) | C46  | C47  | 1.373(8) |
| N3   | C24  | 1.344(3) | C46  | C51  | 1.402(8) |
| N3   | C25  | 1.451(3) | C47  | C48  | 1.393(7) |
| N4   | C33  | 1.331(3) | C48  | C49  | 1.363(8) |
| N4   | C34  | 1.467(3) | C49  | C50  | 1.385(8) |
| N5   | C43  | 1.340(3) | C50  | C51  | 1.389(8) |
| N5   | C44  | 1.453(3) | C46A | C47A | 1.366(9) |
| N6   | C52  | 1.331(3) | C46A | C51A | 1.401(8) |
| N6   | C53  | 1.463(3) | C47A | C48A | 1.396(8) |
| C1   | C2   | 1.507(5) | C48A | C49A | 1.365(8) |
| C1   | C3   | 1.502(5) | C49A | C50A | 1.384(8) |
| C1   | C4   | 1.518(4) | C50A | C51A | 1.388(8) |
| C6   | C7   | 1.538(3) | C53  | C54  | 1.521(4) |
| C6   | C14  | 1.532(3) | C53  | C58  | 1.536(4) |
| C7   | C8   | 1.504(3) | C54  | C55  | 1.526(5) |
| C8   | C9   | 1.385(4) | C55  | C56  | 1.512(5) |
| C8   | C13  | 1.396(4) | C56  | C57  | 1.527(5) |
| C9   | C10  | 1.388(4) | C57  | C58  | 1.535(4) |
| C10  | C11  | 1.380(5) | C58  | C59  | 1.547(4) |
| C11  | C12  | 1.381(5) | C59  | C60  | 1.532(4) |
| C12  | C13  | 1.383(4) | C59  | C62  | 1.517(4) |

|      |      |          |      |      |          |
|------|------|----------|------|------|----------|
| C15  | C16  | 1.531(4) | C60  | C61  | 1.530(4) |
| C15  | C20  | 1.538(3) | C63  | C64  | 1.500(5) |
| C16  | C17  | 1.521(4) | C63  | C64A | 1.510(5) |
| C17  | C18  | 1.518(4) | C63  | C64B | 1.512(6) |
| C18  | C19  | 1.528(4) | C64  | C65  | 1.3900   |
| C19  | C20  | 1.532(4) | C64  | C69  | 1.3900   |
| C20  | C21  | 1.560(3) | C65  | C66  | 1.3900   |
| C21  | C22  | 1.536(3) | C66  | C67  | 1.3900   |
| C21  | C24  | 1.518(4) | C67  | C68  | 1.3900   |
| C22  | C23  | 1.525(4) | C68  | C69  | 1.3900   |
| C25  | C26  | 1.539(3) | C64A | C65A | 1.3900   |
| C25  | C33  | 1.538(4) | C64A | C69A | 1.3900   |
| C26  | C27  | 1.519(4) | C65A | C66A | 1.3900   |
| C26  | C27A | 1.528(4) | C66A | C67A | 1.3900   |
| C27  | C28  | 1.3900   | C67A | C68A | 1.3900   |
| C27  | C32  | 1.3900   | C68A | C69A | 1.3900   |
| C28  | C29  | 1.3900   | C64B | C65B | 1.3900   |
| C29  | C30  | 1.3900   | C64B | C69B | 1.3900   |
| C30  | C31  | 1.3900   | C65B | C66B | 1.3900   |
| C31  | C32  | 1.3900   | C66B | C67B | 1.3900   |
| C27A | C28A | 1.3900   | C67B | C68B | 1.3900   |
| C27A | C32A | 1.3900   | C68B | C69B | 1.3900   |
| C28A | C29A | 1.3900   | Cl1S | C1S  | 1.763(3) |
| C29A | C30A | 1.3900   | Cl2S | C1S  | 1.754(3) |
| C30A | C31A | 1.3900   | Cl3S | C1S  | 1.758(3) |
| C31A | C32A | 1.3900   |      |      |          |

**Table S62.** Bond Angles for gellman156\_sq.

| Atom | Atom | Atom | Angle/°    | Atom | Atom | Atom | Angle/°    |
|------|------|------|------------|------|------|------|------------|
| C5   | O1   | C1   | 120.6(2)   | C38  | C39  | C34  | 111.5(2)   |
| C62  | O9   | C63  | 117.2(2)   | C38  | C39  | C40  | 114.3(2)   |
| C5   | N1   | C6   | 118.5(2)   | C41  | C40  | C39  | 115.2(2)   |
| C14  | N2   | C15  | 122.2(2)   | C43  | C40  | C39  | 110.31(19) |
| C24  | N3   | C25  | 119.1(2)   | C43  | C40  | C41  | 109.82(19) |
| C33  | N4   | C34  | 125.3(2)   | C42  | C41  | C40  | 111.1(2)   |
| C43  | N5   | C44  | 123.45(19) | O6   | C43  | N5   | 122.2(2)   |
| C52  | N6   | C53  | 122.9(2)   | O6   | C43  | C40  | 122.9(2)   |
| O1   | C1   | C2   | 109.9(3)   | N5   | C43  | C40  | 115.0(2)   |
| O1   | C1   | C3   | 110.0(3)   | N5   | C44  | C45  | 107.11(19) |
| O1   | C1   | C4   | 102.3(2)   | N5   | C44  | C52  | 110.8(2)   |
| C2   | C1   | C4   | 110.9(3)   | C52  | C44  | C45  | 109.4(2)   |
| C3   | C1   | C2   | 112.5(4)   | C46  | C45  | C44  | 114.1(3)   |
| C3   | C1   | C4   | 110.7(3)   | C46A | C45  | C44  | 114.8(3)   |
| O2   | C5   | O1   | 124.4(2)   | C47  | C46  | C45  | 121.5(6)   |
| O2   | C5   | N1   | 124.5(2)   | C47  | C46  | C51  | 116.3(4)   |
| N1   | C5   | O1   | 111.1(2)   | C51  | C46  | C45  | 122.2(6)   |
| N1   | C6   | C7   | 110.10(19) | C46  | C47  | C48  | 122.9(5)   |
| N1   | C6   | C14  | 110.82(19) | C49  | C48  | C47  | 119.5(6)   |

|      |      |      |            |      |      |      |           |
|------|------|------|------------|------|------|------|-----------|
| C14  | C6   | C7   | 110.85(19) | C48  | C49  | C50  | 119.9(6)  |
| C8   | C7   | C6   | 113.1(2)   | C49  | C50  | C51  | 119.7(7)  |
| C9   | C8   | C7   | 121.7(2)   | C50  | C51  | C46  | 121.6(6)  |
| C9   | C8   | C13  | 118.1(2)   | C47A | C46A | C45  | 121.3(6)  |
| C13  | C8   | C7   | 120.2(2)   | C47A | C46A | C51A | 119.7(5)  |
| C8   | C9   | C10  | 120.8(3)   | C51A | C46A | C45  | 119.0(6)  |
| C11  | C10  | C9   | 120.4(3)   | C46A | C47A | C48A | 120.0(6)  |
| C10  | C11  | C12  | 119.5(3)   | C49A | C48A | C47A | 120.2(8)  |
| C11  | C12  | C13  | 120.0(3)   | C48A | C49A | C50A | 120.8(7)  |
| C12  | C13  | C8   | 121.1(3)   | C49A | C50A | C51A | 119.1(6)  |
| O3   | C14  | N2   | 123.9(2)   | C50A | C51A | C46A | 120.2(6)  |
| O3   | C14  | C6   | 121.9(2)   | O7   | C52  | N6   | 123.2(2)  |
| N2   | C14  | C6   | 114.2(2)   | O7   | C52  | C44  | 119.9(2)  |
| N2   | C15  | C16  | 111.1(2)   | N6   | C52  | C44  | 116.8(2)  |
| N2   | C15  | C20  | 111.7(2)   | N6   | C53  | C54  | 110.7(2)  |
| C16  | C15  | C20  | 111.2(2)   | N6   | C53  | C58  | 112.3(2)  |
| C17  | C16  | C15  | 110.7(2)   | C54  | C53  | C58  | 110.2(2)  |
| C18  | C17  | C16  | 110.3(2)   | C53  | C54  | C55  | 110.8(3)  |
| C17  | C18  | C19  | 111.5(2)   | C56  | C55  | C54  | 111.4(3)  |
| C18  | C19  | C20  | 111.9(2)   | C55  | C56  | C57  | 111.5(3)  |
| C15  | C20  | C21  | 111.61(19) | C56  | C57  | C58  | 111.3(3)  |
| C19  | C20  | C15  | 107.9(2)   | C53  | C58  | C59  | 112.5(2)  |
| C19  | C20  | C21  | 114.6(2)   | C57  | C58  | C53  | 108.7(2)  |
| C22  | C21  | C20  | 115.4(2)   | C57  | C58  | C59  | 113.5(2)  |
| C24  | C21  | C20  | 108.67(19) | C60  | C59  | C58  | 116.0(2)  |
| C24  | C21  | C22  | 107.0(2)   | C62  | C59  | C58  | 107.2(2)  |
| C23  | C22  | C21  | 112.0(2)   | C62  | C59  | C60  | 113.7(2)  |
| O4   | C24  | N3   | 120.9(2)   | C61  | C60  | C59  | 112.0(3)  |
| O4   | C24  | C21  | 120.4(2)   | O8   | C62  | O9   | 123.4(3)  |
| N3   | C24  | C21  | 118.6(2)   | O8   | C62  | C59  | 124.3(3)  |
| N3   | C25  | C26  | 109.9(2)   | O9   | C62  | C59  | 112.3(2)  |
| N3   | C25  | C33  | 109.0(2)   | O9   | C63  | C64  | 107.8(3)  |
| C33  | C25  | C26  | 111.2(2)   | O9   | C63  | C64A | 107.8(3)  |
| C27  | C26  | C25  | 114.6(5)   | O9   | C63  | C64B | 95.5(10)  |
| C27A | C26  | C25  | 112.1(5)   | C65  | C64  | C63  | 115.6(3)  |
| C28  | C27  | C26  | 116.0(6)   | C65  | C64  | C69  | 120.0     |
| C28  | C27  | C32  | 120.0      | C69  | C64  | C63  | 123.9(3)  |
| C32  | C27  | C26  | 124.0(6)   | C64  | C65  | C66  | 120.0     |
| C27  | C28  | C29  | 120.0      | C67  | C66  | C65  | 120.0     |
| C28  | C29  | C30  | 120.0      | C66  | C67  | C68  | 120.0     |
| C31  | C30  | C29  | 120.0      | C67  | C68  | C69  | 120.0     |
| C30  | C31  | C32  | 120.0      | C68  | C69  | C64  | 120.0     |
| C31  | C32  | C27  | 120.0      | C65A | C64A | C63  | 120.5(4)  |
| C28A | C27A | C26  | 126.0(6)   | C65A | C64A | C69A | 120.0     |
| C28A | C27A | C32A | 120.0      | C69A | C64A | C63  | 119.3(4)  |
| C32A | C27A | C26  | 113.9(7)   | C64A | C65A | C66A | 120.0     |
| C29A | C28A | C27A | 120.0      | C65A | C66A | C67A | 120.0     |
| C28A | C29A | C30A | 120.0      | C68A | C67A | C66A | 120.0     |
| C31A | C30A | C29A | 120.0      | C67A | C68A | C69A | 120.0     |
| C32A | C31A | C30A | 120.0      | C68A | C69A | C64A | 120.0     |
| C31A | C32A | C27A | 120.0      | C65B | C64B | C63  | 105.5(14) |



|     |     |     |            |      |      |      |            |
|-----|-----|-----|------------|------|------|------|------------|
| O5  | C33 | N4  | 124.1(2)   | C65B | C64B | C69B | 120.0      |
| O5  | C33 | C25 | 120.9(2)   | C69B | C64B | C63  | 134.5(14)  |
| N4  | C33 | C25 | 115.0(2)   | C66B | C65B | C64B | 120.0      |
| N4  | C34 | C35 | 109.0(2)   | C65B | C66B | C67B | 120.0      |
| N4  | C34 | C39 | 108.53(19) | C68B | C67B | C66B | 120.0      |
| C35 | C34 | C39 | 112.3(2)   | C67B | C68B | C69B | 120.0      |
| C36 | C35 | C34 | 112.0(2)   | C68B | C69B | C64B | 120.0      |
| C35 | C36 | C37 | 110.0(2)   | Cl2S | C1S  | Cl1S | 111.72(17) |
| C38 | C37 | C36 | 109.8(2)   | Cl2S | C1S  | Cl3S | 109.86(16) |
| C37 | C38 | C39 | 112.8(2)   | Cl3S | C1S  | Cl1S | 109.80(16) |
| C34 | C39 | C40 | 109.74(19) |      |      |      |            |

**Table S63.** Hydrogen Bonds for gellman156\_sq.

| D   | H    | A               | d(D-H)/Å | d(H-A)/Å | d(D-A)/Å | D-H-A/° |
|-----|------|-----------------|----------|----------|----------|---------|
| N1  | H1   | O6 <sup>1</sup> | 0.88     | 2.17     | 2.943(3) | 146.6   |
| N2  | H2   | O5              | 0.88     | 2.12     | 2.990(3) | 169.7   |
| N3  | H3   | O2              | 0.88     | 2.08     | 2.920(3) | 159.3   |
| N4  | H4   | O1S             | 0.88     | 2.04     | 2.863(3) | 156.2   |
| N5  | H5   | O4              | 0.88     | 2.04     | 2.903(3) | 167.3   |
| N6  | H6   | O3 <sup>2</sup> | 0.88     | 2.01     | 2.867(3) | 162.9   |
| C1S | H1S  | O8              | 1.00     | 2.16     | 3.062(4) | 148.7   |
| O1S | H1SA | O7              | 0.87     | 1.95     | 2.781(3) | 158.9   |

<sup>1</sup>+X,-Y,-1/2+Z; <sup>2</sup>+X,-Y,1/2+Z

**Table S64.** Torsion Angles for gellman156\_sq.

| A  | B   | C    | D    | Angle/°    | A   | B   | C   | D   | Angle/°   |
|----|-----|------|------|------------|-----|-----|-----|-----|-----------|
| O9 | C63 | C64  | C65  | -171.5(3)  | C35 | C34 | C39 | C40 | -176.5(2) |
| O9 | C63 | C64  | C69  | 16.2(5)    | C35 | C36 | C37 | C38 | 59.5(3)   |
| O9 | C63 | C64A | C65A | 62.1(5)    | C36 | C37 | C38 | C39 | -57.3(3)  |
| O9 | C63 | C64A | C69A | -111.9(4)  | C37 | C38 | C39 | C34 | 51.8(3)   |
| O9 | C63 | C64B | C65B | 48.4(11)   | C37 | C38 | C39 | C40 | 177.0(2)  |
| O9 | C63 | C64B | C69B | -129.5(19) | C38 | C39 | C40 | C41 | -32.3(3)  |
| N1 | C6  | C7   | C8   | 73.0(2)    | C38 | C39 | C40 | C43 | 92.7(2)   |
| N1 | C6  | C14  | O3   | 36.0(3)    | C39 | C34 | C35 | C36 | 52.8(3)   |
| N1 | C6  | C14  | N2   | -144.1(2)  | C39 | C40 | C41 | C42 | -171.3(2) |
| N2 | C15 | C16  | C17  | -175.8(2)  | C39 | C40 | C43 | O6  | -69.1(3)  |
| N2 | C15 | C20  | C19  | 177.1(2)   | C39 | C40 | C43 | N5  | 110.2(2)  |
| N2 | C15 | C20  | C21  | 50.3(3)    | C41 | C40 | C43 | O6  | 58.9(3)   |
| N3 | C25 | C26  | C27  | 161.5(5)   | C41 | C40 | C43 | N5  | -121.9(2) |
| N3 | C25 | C26  | C27A | 168.7(5)   | C43 | N5  | C44 | C45 | -161.4(2) |
| N3 | C25 | C33  | O5   | 33.6(3)    | C43 | N5  | C44 | C52 | 79.4(3)   |
| N3 | C25 | C33  | N4   | -148.0(2)  | C43 | C40 | C41 | C42 | 63.5(3)   |
| N4 | C34 | C35  | C36  | 173.1(2)   | C44 | N5  | C43 | O6  | 0.2(4)    |
| N4 | C34 | C39  | C38  | -169.4(2)  | C44 | N5  | C43 | C40 | -179.1(2) |
| N4 | C34 | C39  | C40  | 62.9(2)    | C44 | C45 | C46 | C47 | -95.6(6)  |

|     |     |     |      |             |      |      |      |      |            |
|-----|-----|-----|------|-------------|------|------|------|------|------------|
| N5  | C44 | C45 | C46  | 172.5(4)    | C44  | C45  | C46  | C51  | 84.9(6)    |
| N5  | C44 | C45 | C46A | -158.0(4)   | C44  | C45  | C46A | C47A | -83.8(7)   |
| N5  | C44 | C52 | O7   | 53.2(3)     | C44  | C45  | C46A | C51A | 96.1(6)    |
| N5  | C44 | C52 | N6   | -129.1(2)   | C45  | C44  | C52  | O7   | -64.6(3)   |
| N6  | C53 | C54 | C55  | -176.3(3)   | C45  | C44  | C52  | N6   | 113.1(2)   |
| N6  | C53 | C58 | C57  | 176.6(2)    | C45  | C46  | C47  | C48  | 179.9(5)   |
| N6  | C53 | C58 | C59  | 50.0(3)     | C45  | C46  | C51  | C50  | -179.2(10) |
| C1  | O1  | C5  | O2   | 2.7(4)      | C45  | C46A | C47A | C48A | 179.0(12)  |
| C1  | O1  | C5  | N1   | -176.3(2)   | C45  | C46A | C51A | C50A | -178.3(6)  |
| C5  | O1  | C1  | C2   | -60.8(4)    | C46  | C45  | C46A | C47A | 11.0(7)    |
| C5  | O1  | C1  | C3   | 63.7(3)     | C46  | C45  | C46A | C51A | -169.1(15) |
| C5  | O1  | C1  | C4   | -178.6(2)   | C46  | C47  | C48  | C49  | -0.8(9)    |
| C5  | N1  | C6  | C7   | -173.1(2)   | C47  | C46  | C51  | C50  | 1.3(12)    |
| C5  | N1  | C6  | C14  | 63.9(3)     | C47  | C48  | C49  | C50  | 1.5(12)    |
| C6  | N1  | C5  | O1   | -172.1(2)   | C48  | C49  | C50  | C51  | -0.8(19)   |
| C6  | N1  | C5  | O2   | 8.9(4)      | C49  | C50  | C51  | C46  | -0.6(19)   |
| C6  | C7  | C8  | C9   | -103.9(3)   | C51  | C46  | C47  | C48  | -0.6(9)    |
| C6  | C7  | C8  | C13  | 77.3(3)     | C46A | C45  | C46  | C47  | 166.8(14)  |
| C7  | C6  | C14 | O3   | -86.6(3)    | C46A | C45  | C46  | C51  | -12.7(7)   |
| C7  | C6  | C14 | N2   | 93.3(2)     | C46A | C47A | C48A | C49A | -1(2)      |
| C7  | C8  | C9  | C10  | -177.1(3)   | C47A | C46A | C51A | C50A | 1.6(10)    |
| C7  | C8  | C13 | C12  | 177.2(2)    | C47A | C48A | C49A | C50A | 2(2)       |
| C8  | C9  | C10 | C11  | -0.8(5)     | C48A | C49A | C50A | C51A | -0.9(16)   |
| C9  | C8  | C13 | C12  | -1.7(4)     | C49A | C50A | C51A | C46A | -0.7(10)   |
| C9  | C10 | C11 | C12  | -0.2(5)     | C51A | C46A | C47A | C48A | -0.8(15)   |
| C10 | C11 | C12 | C13  | 0.3(5)      | C52  | N6   | C53  | C54  | 108.9(3)   |
| C11 | C12 | C13 | C8   | 0.7(5)      | C52  | N6   | C53  | C58  | -127.4(2)  |
| C13 | C8  | C9  | C10  | 1.8(4)      | C52  | C44  | C45  | C46  | -67.4(4)   |
| C14 | N2  | C15 | C16  | 95.6(3)     | C52  | C44  | C45  | C46A | -37.9(5)   |
| C14 | N2  | C15 | C20  | -139.5(2)   | C53  | N6   | C52  | O7   | 5.3(4)     |
| C14 | C6  | C7  | C8   | -163.99(19) | C53  | N6   | C52  | C44  | -172.3(2)  |
| C15 | N2  | C14 | O3   | 0.2(4)      | C53  | C54  | C55  | C56  | -55.7(4)   |
| C15 | N2  | C14 | C6   | -179.7(2)   | C53  | C58  | C59  | C60  | 53.1(3)    |
| C15 | C16 | C17 | C18  | -56.4(3)    | C53  | C58  | C59  | C62  | -178.7(2)  |
| C15 | C20 | C21 | C22  | 143.0(2)    | C54  | C53  | C58  | C57  | -59.4(3)   |
| C15 | C20 | C21 | C24  | -96.8(2)    | C54  | C53  | C58  | C59  | 174.0(2)   |
| C16 | C15 | C20 | C19  | -58.2(3)    | C54  | C55  | C56  | C57  | 54.0(4)    |
| C16 | C15 | C20 | C21  | 175.0(2)    | C55  | C56  | C57  | C58  | -55.7(4)   |
| C16 | C17 | C18 | C19  | 55.3(3)     | C56  | C57  | C58  | C53  | 57.8(3)    |
| C17 | C18 | C19 | C20  | -56.9(3)    | C56  | C57  | C58  | C59  | -176.2(2)  |
| C18 | C19 | C20 | C15  | 57.0(3)     | C57  | C58  | C59  | C60  | -70.9(3)   |
| C18 | C19 | C20 | C21  | -178.0(2)   | C57  | C58  | C59  | C62  | 57.3(3)    |
| C19 | C20 | C21 | C22  | 20.0(3)     | C58  | C53  | C54  | C55  | 58.8(3)    |
| C19 | C20 | C21 | C24  | 140.2(2)    | C58  | C59  | C60  | C61  | -166.9(2)  |
| C20 | C15 | C16 | C17  | 59.1(3)     | C58  | C59  | C62  | O8   | 63.5(4)    |
| C20 | C21 | C22 | C23  | -179.1(2)   | C58  | C59  | C62  | O9   | -115.3(3)  |
| C20 | C21 | C24 | O4   | -63.5(3)    | C60  | C59  | C62  | O8   | -166.9(3)  |
| C20 | C21 | C24 | N3   | 116.6(2)    | C60  | C59  | C62  | O9   | 14.3(3)    |
| C22 | C21 | C24 | O4   | 61.8(3)     | C62  | O9   | C63  | C64  | 154.6(3)   |
| C22 | C21 | C24 | N3   | -118.1(2)   | C62  | O9   | C63  | C64A | -178.7(3)  |
| C24 | N3  | C25 | C26  | -177.2(2)   | C62  | O9   | C63  | C64B | -160.6(10) |

|      |      |      |      |           |      |      |      |      |            |
|------|------|------|------|-----------|------|------|------|------|------------|
| C24  | N3   | C25  | C33  | 60.8(3)   | C62  | C59  | C60  | C61  | 68.1(3)    |
| C24  | C21  | C22  | C23  | 59.7(3)   | C63  | O9   | C62  | O8   | 0.4(4)     |
| C25  | N3   | C24  | O4   | 8.7(4)    | C63  | O9   | C62  | C59  | 179.2(3)   |
| C25  | N3   | C24  | C21  | -171.4(2) | C63  | C64  | C65  | C66  | -172.6(5)  |
| C25  | C26  | C27  | C28  | 108.4(6)  | C63  | C64  | C69  | C68  | 171.9(5)   |
| C25  | C26  | C27  | C32  | -73.4(5)  | C63  | C64A | C65A | C66A | -173.9(5)  |
| C25  | C26  | C27A | C28A | 90.9(8)   | C63  | C64A | C69A | C68A | 174.0(5)   |
| C25  | C26  | C27A | C32A | -84.8(4)  | C63  | C64B | C65B | C66B | -178.3(19) |
| C26  | C25  | C33  | O5   | -87.7(3)  | C63  | C64B | C69B | C68B | 178(3)     |
| C26  | C25  | C33  | N4   | 90.8(3)   | C64  | C63  | C64A | C65A | 156.3(8)   |
| C26  | C27  | C28  | C29  | 178.3(7)  | C64  | C63  | C64A | C69A | -17.7(5)   |
| C26  | C27  | C32  | C31  | -178.2(7) | C64  | C63  | C64B | C65B | 158.1(19)  |
| C26  | C27A | C28A | C29A | -175.5(9) | C64  | C63  | C64B | C69B | -19.9(14)  |
| C26  | C27A | C32A | C31A | 176.0(7)  | C64  | C65  | C66  | C67  | 0.0        |
| C27  | C26  | C27A | C28A | -157(7)   | C65  | C64  | C69  | C68  | 0.0        |
| C27  | C26  | C27A | C32A | 28(7)     | C65  | C66  | C67  | C68  | 0.0        |
| C27  | C28  | C29  | C30  | 0.0       | C66  | C67  | C68  | C69  | 0.0        |
| C28  | C27  | C32  | C31  | 0.0       | C67  | C68  | C69  | C64  | 0.0        |
| C28  | C29  | C30  | C31  | 0.0       | C69  | C64  | C65  | C66  | 0.0        |
| C29  | C30  | C31  | C32  | 0.0       | C64A | C63  | C64  | C65  | 94.4(7)    |
| C30  | C31  | C32  | C27  | 0.0       | C64A | C63  | C64  | C69  | -77.9(7)   |
| C32  | C27  | C28  | C29  | 0.0       | C64A | C63  | C64B | C65B | 175(4)     |
| C27A | C26  | C27  | C28  | 38(7)     | C64A | C63  | C64B | C69B | -3.3(18)   |
| C27A | C26  | C27  | C32  | -144(7)   | C64A | C65A | C66A | C67A | 0.0        |
| C27A | C28A | C29A | C30A | 0.0       | C65A | C64A | C69A | C68A | 0.0        |
| C28A | C27A | C32A | C31A | 0.0       | C65A | C66A | C67A | C68A | 0.0        |
| C28A | C29A | C30A | C31A | 0.0       | C66A | C67A | C68A | C69A | 0.0        |
| C29A | C30A | C31A | C32A | 0.0       | C67A | C68A | C69A | C64A | 0.0        |
| C30A | C31A | C32A | C27A | 0.0       | C69A | C64A | C65A | C66A | 0.0        |
| C32A | C27A | C28A | C29A | 0.0       | C64B | C63  | C64  | C65  | 108.5(15)  |
| C33  | N4   | C34  | C35  | 121.1(2)  | C64B | C63  | C64  | C69  | -63.8(15)  |
| C33  | N4   | C34  | C39  | -116.3(2) | C64B | C63  | C64A | C65A | 5(3)       |
| C33  | C25  | C26  | C27  | -77.7(5)  | C64B | C63  | C64A | C69A | -169(3)    |
| C33  | C25  | C26  | C27A | -70.6(5)  | C64B | C65B | C66B | C67B | 0.0        |
| C34  | N4   | C33  | O5   | -2.1(4)   | C65B | C64B | C69B | C68B | 0.0        |
| C34  | N4   | C33  | C25  | 179.4(2)  | C65B | C66B | C67B | C68B | 0.0        |
| C34  | C35  | C36  | C37  | -58.0(3)  | C66B | C67B | C68B | C69B | 0.0        |
| C34  | C39  | C40  | C41  | 93.9(2)   | C67B | C68B | C69B | C64B | 0.0        |
| C34  | C39  | C40  | C43  | -141.1(2) | C69B | C64B | C65B | C66B | 0.0        |
| C35  | C34  | C39  | C38  | -48.9(3)  |      |      |      |      |            |

**Table S65.** Hydrogen Atom Coordinates ( $\text{\AA}\times 10^4$ ) and Isotropic Displacement Parameters ( $\text{\AA}^2\times 10^3$ ) for gellman156\_sq.

| Atom | x    | y    | z    | U(eq) |
|------|------|------|------|-------|
| H1   | 7651 | 195  | 2665 | 34    |
| H2   | 7410 | -601 | 4288 | 32    |
| H3   | 6719 | 1058 | 4017 | 35    |
| H4   | 8131 | 2121 | 5399 | 33    |

---

|      |       |       |      |     |
|------|-------|-------|------|-----|
| H5   | 7077  | 982   | 5975 | 33  |
| H6   | 6857  | 2101  | 7501 | 34  |
| H2A  | 5712  | 572   | 2212 | 136 |
| H2B  | 5343  | 1499  | 2036 | 136 |
| H2C  | 5685  | 1345  | 2649 | 136 |
| H3A  | 6433  | 2507  | 2830 | 116 |
| H3B  | 6074  | 3018  | 2299 | 116 |
| H3C  | 6781  | 2820  | 2386 | 116 |
| H4A  | 6584  | 2041  | 1512 | 69  |
| H4B  | 5868  | 2161  | 1414 | 69  |
| H4C  | 6154  | 1160  | 1404 | 69  |
| H6A  | 7730  | 285   | 3725 | 30  |
| H7A  | 8378  | -1081 | 3767 | 33  |
| H7B  | 8262  | -1011 | 3129 | 33  |
| H9   | 8874  | 8     | 2747 | 46  |
| H10  | 9696  | 1001  | 2863 | 60  |
| H11  | 10109 | 1641  | 3700 | 62  |
| H12  | 9695  | 1285  | 4425 | 53  |
| H13  | 8876  | 293   | 4313 | 42  |
| H15  | 6436  | -1746 | 3901 | 33  |
| H16A | 7273  | -2754 | 4155 | 41  |
| H16B | 7411  | -2357 | 4754 | 41  |
| H17A | 6339  | -3344 | 4246 | 52  |
| H17B | 6861  | -3732 | 4726 | 52  |
| H18A | 6627  | -2646 | 5320 | 55  |
| H18B | 6022  | -3190 | 5048 | 55  |
| H19A | 5832  | -1586 | 5054 | 45  |
| H19B | 5694  | -1965 | 4452 | 45  |
| H20  | 6789  | -1049 | 4973 | 33  |
| H21  | 6117  | -164  | 4051 | 34  |
| H22A | 5286  | -452  | 4455 | 44  |
| H22B | 5653  | 14    | 4999 | 44  |
| H23A | 5616  | 1443  | 4576 | 78  |
| H23B | 4942  | 1051  | 4467 | 78  |
| H23C | 5310  | 996   | 4008 | 78  |
| H25  | 7217  | 2126  | 4852 | 35  |
| H26A | 7760  | 1897  | 3957 | 47  |
| H26B | 7143  | 2457  | 3887 | 47  |
| H26C | 7718  | 1884  | 3928 | 47  |
| H26D | 7146  | 2531  | 3912 | 47  |
| H28  | 8650  | 2608  | 4203 | 54  |
| H29  | 9250  | 3907  | 4466 | 62  |
| H30  | 8831  | 5220  | 4759 | 65  |
| H31  | 7813  | 5234  | 4790 | 63  |
| H32  | 7213  | 3935  | 4528 | 52  |
| H28A | 8772  | 2514  | 4420 | 51  |
| H29A | 9328  | 3784  | 4820 | 61  |
| H30A | 8828  | 5101  | 5010 | 62  |
| H31A | 7771  | 5147  | 4800 | 63  |
| H32A | 7216  | 3877  | 4400 | 49  |
| H34  | 8853  | 549   | 5549 | 34  |

---

---

|      |       |       |      |    |
|------|-------|-------|------|----|
| H35A | 9406  | 1780  | 5326 | 44 |
| H35B | 9217  | 2428  | 5763 | 44 |
| H36A | 10216 | 1911  | 6095 | 50 |
| H36B | 9998  | 864   | 6012 | 50 |
| H37A | 10114 | 1288  | 6926 | 47 |
| H37B | 9641  | 2111  | 6751 | 47 |
| H38A | 9142  | 845   | 7028 | 42 |
| H38B | 9354  | 197   | 6603 | 42 |
| H39  | 8514  | 1679  | 6349 | 32 |
| H40  | 7870  | 389   | 5851 | 32 |
| H41A | 8596  | -808  | 6146 | 41 |
| H41B | 8518  | -659  | 6745 | 41 |
| H42A | 7490  | -1084 | 6477 | 71 |
| H42B | 7895  | -1887 | 6319 | 71 |
| H42C | 7546  | -1191 | 5870 | 71 |
| H44  | 6719  | 972   | 6918 | 32 |
| H45A | 6107  | 1744  | 5894 | 40 |
| H45B | 6047  | 687   | 6039 | 40 |
| H45C | 6163  | 1455  | 5830 | 40 |
| H45D | 5950  | 677   | 6184 | 40 |
| H47  | 5357  | 247   | 6579 | 51 |
| H48  | 4537  | 568   | 6945 | 59 |
| H49  | 4261  | 2077  | 7043 | 56 |
| H50  | 4781  | 3268  | 6738 | 52 |
| H51  | 5590  | 2937  | 6356 | 50 |
| H47A | 5347  | 1140  | 6837 | 49 |
| H48A | 4625  | 2167  | 7015 | 49 |
| H49A | 4506  | 3594  | 6613 | 56 |
| H50A | 5065  | 4003  | 5993 | 56 |
| H51A | 5771  | 2967  | 5799 | 48 |
| H53  | 7020  | 3900  | 7199 | 40 |
| H54A | 6249  | 3417  | 7892 | 60 |
| H54B | 6012  | 3738  | 7282 | 60 |
| H55A | 6436  | 5203  | 7487 | 74 |
| H55B | 6006  | 4987  | 7884 | 74 |
| H56A | 6832  | 4631  | 8578 | 66 |
| H56B | 6947  | 5620  | 8349 | 66 |
| H57A | 7831  | 4687  | 8477 | 52 |
| H57B | 7604  | 4985  | 7862 | 52 |
| H58  | 7343  | 3245  | 8280 | 41 |
| H59  | 7990  | 2518  | 7855 | 44 |
| H60A | 7912  | 3523  | 7093 | 49 |
| H60B | 8400  | 4176  | 7467 | 49 |
| H61A | 9128  | 2998  | 7586 | 86 |
| H61B | 8867  | 3155  | 6957 | 86 |
| H61C | 8640  | 2302  | 7250 | 86 |
| H63A | 9516  | 3526  | 9075 | 69 |
| H63B | 9314  | 4584  | 9052 | 69 |
| H63C | 9650  | 3503  | 8982 | 69 |
| H63D | 9262  | 4344  | 9128 | 69 |
| H63E | 9751  | 3592  | 8918 | 69 |

---

|      |       |      |      |     |
|------|-------|------|------|-----|
| H63F | 9278  | 4186 | 9165 | 69  |
| H65  | 10518 | 4243 | 9427 | 56  |
| H66  | 11402 | 4819 | 9233 | 71  |
| H67  | 11408 | 5259 | 8357 | 85  |
| H68  | 10529 | 5123 | 7675 | 81  |
| H69  | 9644  | 4547 | 7869 | 63  |
| H65A | 9289  | 5818 | 8506 | 75  |
| H66A | 9945  | 6793 | 8190 | 114 |
| H67A | 10923 | 6301 | 8188 | 101 |
| H68A | 11244 | 4834 | 8501 | 94  |
| H69A | 10587 | 3859 | 8817 | 76  |
| H65B | 8758  | 5241 | 8453 | 75  |
| H66B | 8836  | 6659 | 8047 | 75  |
| H67B | 9783  | 7209 | 7984 | 75  |
| H68B | 10651 | 6341 | 8328 | 75  |
| H69B | 10574 | 4923 | 8734 | 75  |
| H1S  | 8592  | 2897 | 9699 | 49  |
| H1SA | 7481  | 2916 | 5949 | 111 |
| H1SB | 7792  | 3691 | 5811 | 111 |

**Table S66.** Atomic Occupancy for gellman156\_sq.

| <b>Atom</b> | <b>Occupancy</b> | <b>Atom</b> | <b>Occupancy</b> | <b>Atom</b> | <b>Occupancy</b> |
|-------------|------------------|-------------|------------------|-------------|------------------|
| H26A        | 0.516(15)        | H26B        | 0.516(15)        | H26C        | 0.484(15)        |
| H26D        | 0.484(15)        | C27         | 0.516(15)        | C28         | 0.516(15)        |
| H28         | 0.516(15)        | C29         | 0.516(15)        | H29         | 0.516(15)        |
| C30         | 0.516(15)        | H30         | 0.516(15)        | C31         | 0.516(15)        |
| H31         | 0.516(15)        | C32         | 0.516(15)        | H32         | 0.516(15)        |
| C27A        | 0.484(15)        | C28A        | 0.484(15)        | H28A        | 0.484(15)        |
| C29A        | 0.484(15)        | H29A        | 0.484(15)        | C30A        | 0.484(15)        |
| H30A        | 0.484(15)        | C31A        | 0.484(15)        | H31A        | 0.484(15)        |
| C32A        | 0.484(15)        | H32A        | 0.484(15)        | H45A        | 0.543(5)         |
| H45B        | 0.543(5)         | H45C        | 0.457(5)         | H45D        | 0.457(5)         |
| C46         | 0.543(5)         | C47         | 0.543(5)         | H47         | 0.543(5)         |
| C48         | 0.543(5)         | H48         | 0.543(5)         | C49         | 0.543(5)         |
| H49         | 0.543(5)         | C50         | 0.543(5)         | H50         | 0.543(5)         |
| C51         | 0.543(5)         | H51         | 0.543(5)         | C46A        | 0.457(5)         |
| C47A        | 0.457(5)         | H47A        | 0.457(5)         | C48A        | 0.457(5)         |
| H48A        | 0.457(5)         | C49A        | 0.457(5)         | H49A        | 0.457(5)         |
| C50A        | 0.457(5)         | H50A        | 0.457(5)         | C51A        | 0.457(5)         |
| H51A        | 0.457(5)         | H63A        | 0.450(2)         | H63B        | 0.450(2)         |
| H63C        | 0.442(3)         | H63D        | 0.442(3)         | H63E        | 0.109(3)         |
| H63F        | 0.109(3)         | C64         | 0.450(2)         | C65         | 0.450(2)         |
| H65         | 0.450(2)         | C66         | 0.450(2)         | H66         | 0.450(2)         |
| C67         | 0.450(2)         | H67         | 0.450(2)         | C68         | 0.450(2)         |
| H68         | 0.450(2)         | C69         | 0.450(2)         | H69         | 0.450(2)         |
| C64A        | 0.442(3)         | C65A        | 0.442(3)         | H65A        | 0.442(3)         |
| C66A        | 0.442(3)         | H66A        | 0.442(3)         | C67A        | 0.442(3)         |
| H67A        | 0.442(3)         | C68A        | 0.442(3)         | H68A        | 0.442(3)         |

|      |          |      |          |      |          |
|------|----------|------|----------|------|----------|
| C69A | 0.442(3) | H69A | 0.442(3) | C64B | 0.109(3) |
| C65B | 0.109(3) | H65B | 0.109(3) | C66B | 0.109(3) |
| H66B | 0.109(3) | C67B | 0.109(3) | H67B | 0.109(3) |
| C68B | 0.109(3) | H68B | 0.109(3) | C69B | 0.109(3) |
| H69B | 0.109(3) |      |          |      |          |

## Crystallographic Experimental Section for Compound *rac*-3b

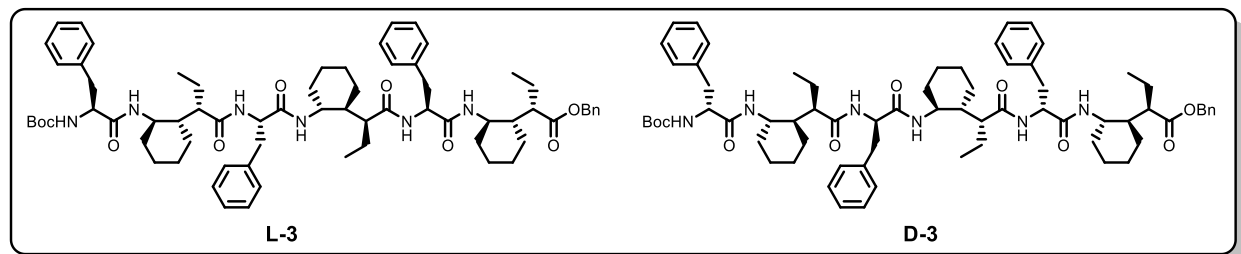

### Data Collection

A colorless crystal with approximate dimensions 0.790 x 0.548 x 0.358 mm<sup>3</sup> was selected from the mother liquor at -15° C using a low temperature basin filled with dry-ice under a constant flow of argon to provide an inert atmosphere. The crystal was attached to the tip of a MiTeGen MicroMesh©. The crystal was mounted in a stream of cold nitrogen at 100(1) K and centered in the X-ray beam by using a video camera.

The crystal evaluation and data collection were performed on a Bruker SMART APEXII diffractometer with Cu K<sub>α</sub> ( $\lambda = 1.54178 \text{ \AA}$ ) radiation and the diffractometer to crystal distance of 4.03 cm.

The initial cell constants were obtained from three series of  $\omega$  scans at different starting angles. Each series consisted of 35 frames collected at intervals of 0.7° in a 25° range about  $\omega$  with the exposure time of 3 seconds per frame. The reflections were successfully indexed by an automated indexing routine built in the APEXII program. The final cell constants were calculated from a set of 9122 strong reflections from the actual data collection.

The data were collected by using the full sphere data collection routine to survey the reciprocal space to the extent of a full sphere to a resolution of 0.82 Å. A total of 137980 data were harvested by collecting 19 sets of frames with 0.7° scans in  $\omega$  and  $\phi$  with an exposure time 8-15 sec per frame. These highly redundant datasets were corrected for Lorentz and polarization effects. The absorption correction was based on fitting a function to the empirical transmission surface as sampled by multiple equivalent measurements. [1]

### Structure Solution and Refinement

The systematic absences in the diffraction data were uniquely consistent for the space group  $P2_1/c$  that yielded chemically reasonable and computationally stable results of refinement [2-4].

A successful solution by the direct methods provided most non-hydrogen atoms from the *E*-map. The remaining non-hydrogen atoms were located in an alternating series of least-squares cycles and difference Fourier maps. All non-hydrogen atoms except where noted were refined with anisotropic displacement coefficients. All hydrogen atoms were included in the structure factor calculation at idealized

positions and were allowed to ride on the neighboring atoms with relative isotropic displacement coefficients.

The asymmetric unit consists of one molecule of the foldamer shown in Figure 1, 1.6 molecules of chloroform, and 1.4 molecules of pentane. The foldamer has positional disorder in the benzyl group C63 (major component: 89.3(10)%). Bond distance restraints and constraints as well as thermal parameter restraints were used to ensure a chemically reasonable and computationally stable refinement.

There are two compositionally and positionally disordered solvent molecule locations in the asymmetric unit, contributing 0.6 molecules of CHCl<sub>3</sub> and 1.4 molecules pentane to the overall asymmetric unit composition. Disordered solvent position C71 contains two positions of pentane (occupancies: 68.7(3)% , 15.5(3)% ) and one positions of chloroform (occupancy: 15.82(19)%). Disordered solvent position C76 contains one position of pentane (occupancy: 55.9(2)% ) and three positions of chloroform (occupancies 22.13(17)% , 14.63(17)% , 7.38(17)%). Disordered chloroform molecule C76C was refined isotropically. All disordered solvent molecules were modelled with idealized geometries as well as thermal parameter restraints and constraints [5].

The foldamer's conformation is stabilized by the presence of discrete hydrogen bonds between N-H and O atoms of alternating amide groups (e.g. the amide group N1 forms a hydrogen bond with amide group N3). This pattern is broken by amide groups N4 and N6, which are not oriented to form a hydrogen bond. This intramolecular hydrogen bonding motif is propagated in the intermolecular interactions. The penultimate amide group forms a hydrogen bond with the first amide group, and the last amide group forms a hydrogen bond with the second amide group of an adjacent molecule (symmetry code: x, 3/2-y, z+1/2).

The final least-squares refinement of 1076 parameters against 15878 data resulted in residuals *R* (based on *F*<sup>2</sup> for *I* ≥ 2σ) and *wR* (based on *F*<sup>2</sup> for all data) of 0.0573 and 0.1488, respectively. The final difference Fourier map contained several peaks of electron density not exceeding ca. 1.2 e<sup>-</sup>/Å<sup>3</sup> in the vicinity of the disordered solvent molecules and considered noise.

## Summary

**Crystal Data** for C<sub>69</sub>H<sub>94</sub>N<sub>6</sub>O<sub>9</sub>, 1.6(CHCl<sub>3</sub>), 1.4(C<sub>5</sub>H<sub>12</sub>) (*M* = 1443.83): monoclinic, space group P2<sub>1</sub>/c (no. 14), *a* = 11.9161(8) Å, *b* = 27.097(4) Å, *c* = 25.5162(16) Å, β = 97.111(4)°, *V* = 8175.4(14) Å<sup>3</sup>, *Z* = 4, *T* = 100.0 K, μ(CuKα) = 2.001 mm<sup>-1</sup>, *D*<sub>calc</sub> = 1.173 g/mm<sup>3</sup>, 137980 reflections measured (6.524 ≤ 2θ ≤ 146.448), 15878 unique (*R*<sub>int</sub> = 0.0239, *R*<sub>sigma</sub> = 0.0116) which were used in all calculations. The final *R*<sub>1</sub> was 0.0573 (*I* > 2σ(*I*)) and *wR*<sub>2</sub> was 0.1488 (all data).

## References

- [1] Bruker-AXS. (2007-2014) APEX2 (Ver. 2014.1-1), SADABS (2012-1), and SAINT+ (Ver. 8.32A) Software Reference Manuals. Bruker-AXS, Madison, Wisconsin, USA.
- [2] Sheldrick, G. M. (2008) SHELXL. *Acta Cryst.* **A64**, 112-122.
- [3] Dolomanov, O.V.; Bourhis, L.J.; Gildea, R.J.; Howard, J.A.K.; Puschmann, H. "OLEX2: a complete structure solution, refinement and analysis program". *J. Appl. Cryst.* (2009) **42**, 339-341.
- [4] Guzei, I.A. (2013). Internal laboratory computer programs Gn.
- [5] Guzei, I. A. (2014). *J. Appl. Cryst.* **47**, 806-809.



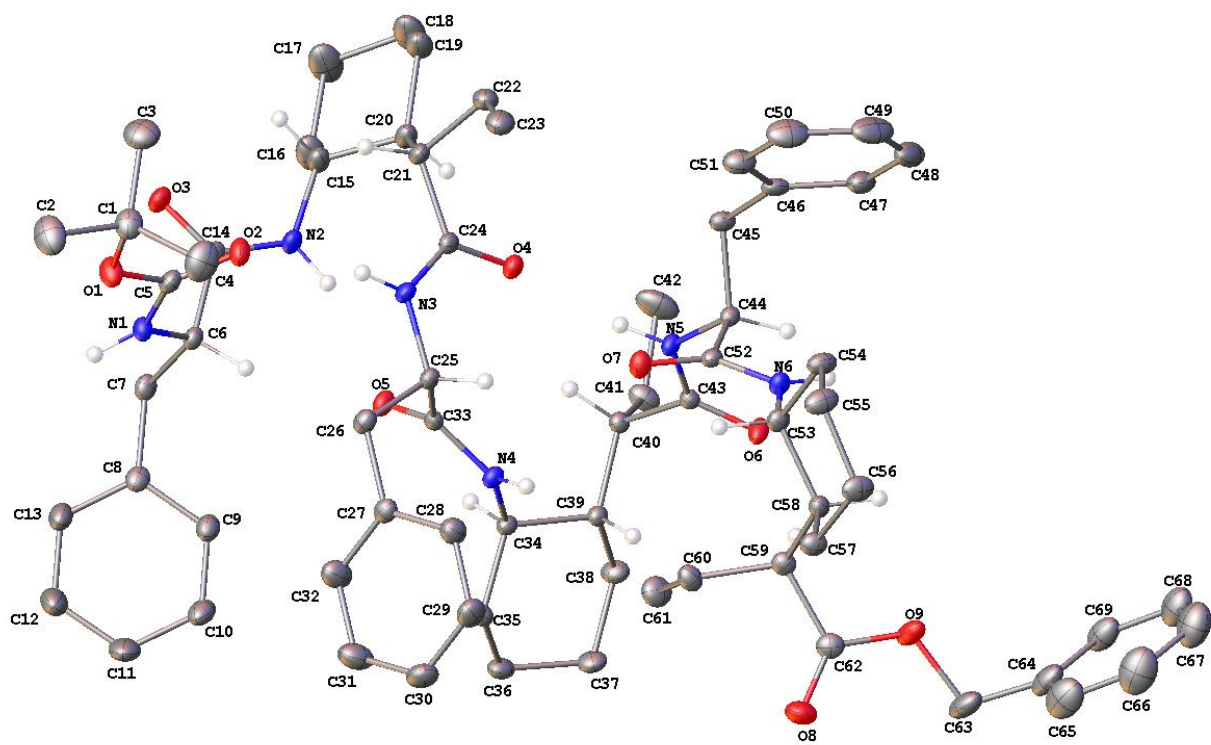

**Figure S37.** The foldamer of Gellman157. All atoms are drawn as 40% thermal probability ellipsoids. All disordered components and H atoms are omitted except those on heteroatoms and chiral carbons are omitted for clarity.

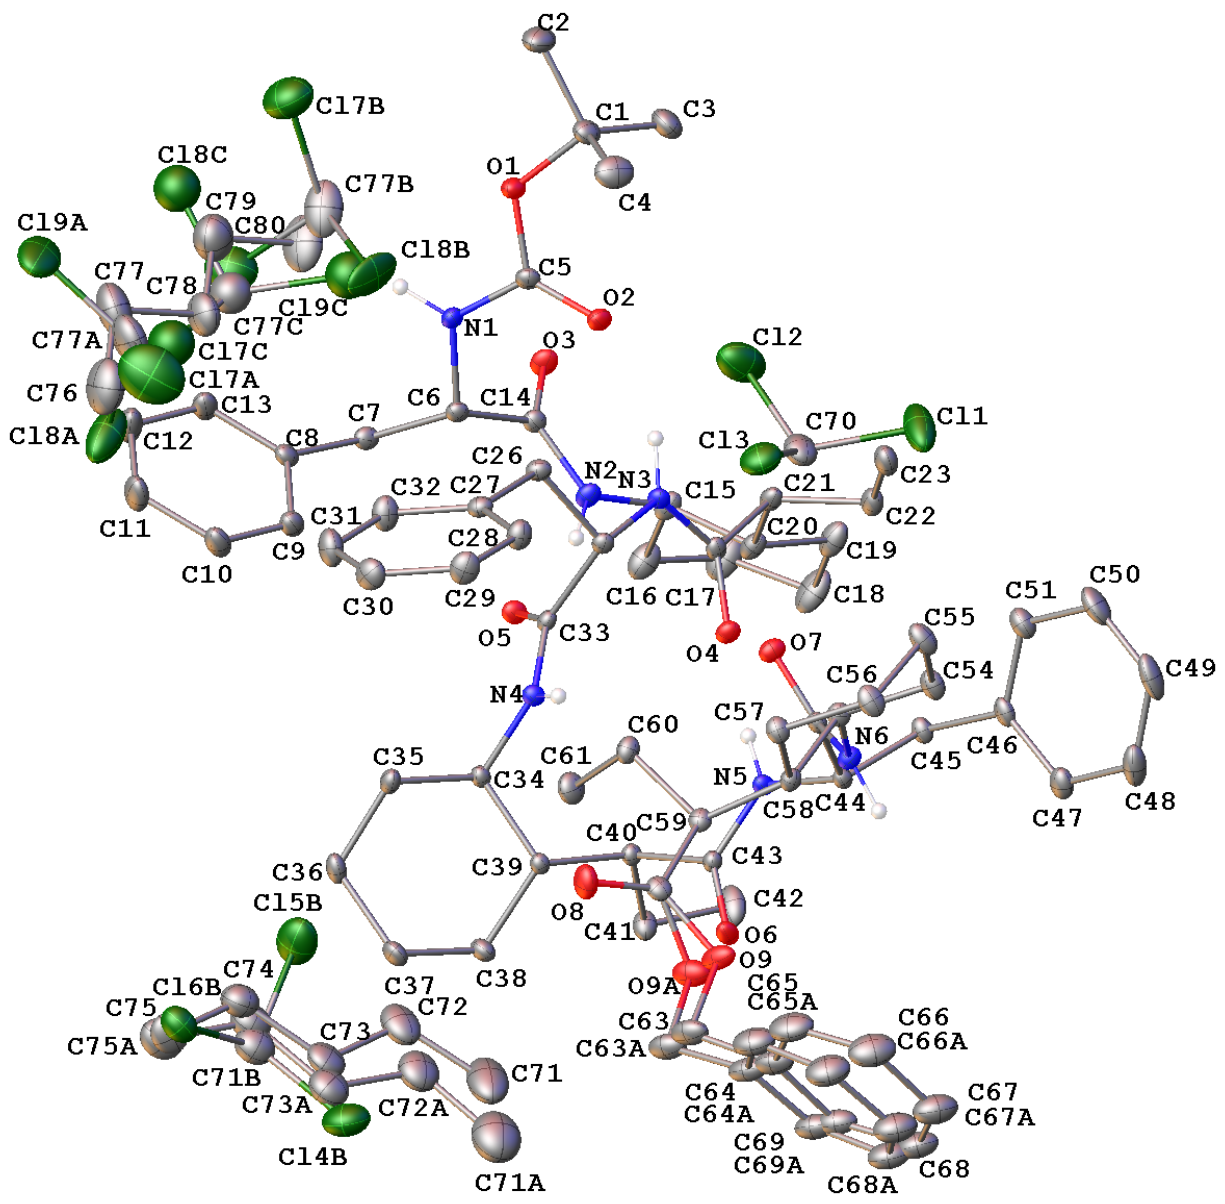

**Figure S38.** The asymmetric unit of Gellman157 showing all disordered components and solvent molecules. All atoms are drawn as 30% thermal probability ellipsoids. All H atoms except those on heteroatoms are omitted for clarity.

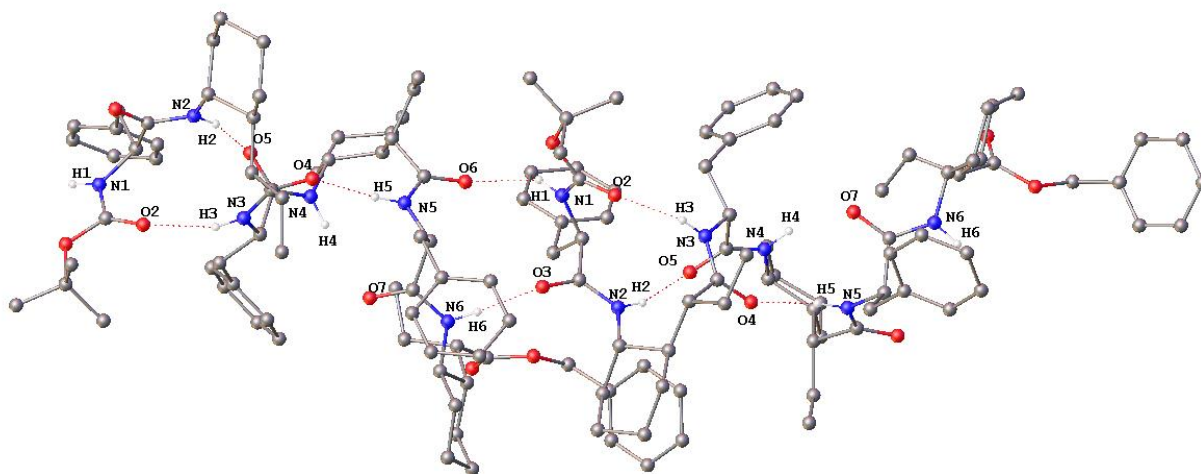

**Figure S39.** The intermolecular packing diagram for Gellman157. All H atoms except those on heteroatoms are omitted for clarity.

**Table S67.** Crystal data and structure refinement for Gellman157.

|                                                   |                                                                                                                               |
|---------------------------------------------------|-------------------------------------------------------------------------------------------------------------------------------|
| <b>Identification code</b>                        | Gellman157                                                                                                                    |
| <b>Empirical formula</b>                          | C <sub>69</sub> H <sub>94</sub> N <sub>6</sub> O <sub>9</sub> , 1.6(CHCl <sub>3</sub> ), 1.4(C <sub>5</sub> H <sub>12</sub> ) |
| <b>Formula weight</b>                             | 1443.83                                                                                                                       |
| <b>Temperature/K</b>                              | 100.0                                                                                                                         |
| <b>Crystal system</b>                             | monoclinic                                                                                                                    |
| <b>Space group</b>                                | P2 <sub>1</sub> /c                                                                                                            |
| <b>a/Å</b>                                        | 11.9161(8)                                                                                                                    |
| <b>b/Å</b>                                        | 27.097(4)                                                                                                                     |
| <b>c/Å</b>                                        | 25.5162(16)                                                                                                                   |
| <b>α/°</b>                                        | 90                                                                                                                            |
| <b>β/°</b>                                        | 97.111(4)                                                                                                                     |
| <b>γ/°</b>                                        | 90                                                                                                                            |
| <b>Volume/Å<sup>3</sup></b>                       | 8175.4(14)                                                                                                                    |
| <b>Z</b>                                          | 4                                                                                                                             |
| <b>ρ<sub>calc</sub>/mg/mm<sup>3</sup></b>         | 1.173                                                                                                                         |
| <b>m/mm<sup>-1</sup></b>                          | 2.001                                                                                                                         |
| <b>F(000)</b>                                     | 3095.0                                                                                                                        |
| <b>Crystal size/mm<sup>3</sup></b>                | 0.79 × 0.548 × 0.358                                                                                                          |
| <b>Radiation</b>                                  | CuKα (λ = 1.54178)                                                                                                            |
| <b>2θ range for data collection</b>               | 6.524 to 146.448°                                                                                                             |
| <b>Index ranges</b>                               | -14 ≤ h ≤ 14, -26 ≤ k ≤ 31, -31 ≤ l ≤ 30                                                                                      |
| <b>Reflections collected</b>                      | 137980                                                                                                                        |
| <b>Independent reflections</b>                    | 15878 [R <sub>int</sub> = 0.0239, R <sub>sigma</sub> = 0.0116]                                                                |
| <b>Data/restraints/parameters</b>                 | 15878/559/1076                                                                                                                |
| <b>Goodness-of-fit on F<sup>2</sup></b>           | 1.062                                                                                                                         |
| <b>Final R indexes [I &gt;= 2σ(I)]</b>            | R <sub>1</sub> = 0.0573, wR <sub>2</sub> = 0.1475                                                                             |
| <b>Final R indexes [all data]</b>                 | R <sub>1</sub> = 0.0590, wR <sub>2</sub> = 0.1488                                                                             |
| <b>Largest diff. peak/hole / e Å<sup>-3</sup></b> | 1.13/-0.90                                                                                                                    |

**Table S68.** Fractional Atomic Coordinates (×10<sup>4</sup>) and Equivalent Isotropic Displacement Parameters (Å<sup>2</sup>×10<sup>3</sup>) for Gellman157. U<sub>eq</sub> is defined as 1/3 of the trace of the orthogonalised U<sub>ij</sub> tensor.

| <b>Atom</b> | <b>x</b>   | <b>y</b>  | <b>z</b>  | <b>U(eq)</b> |
|-------------|------------|-----------|-----------|--------------|
| O1          | 2097.3(11) | 6457.4(5) | 632.9(5)  | 26.7(3)      |
| O2          | 1828.8(11) | 6841.6(5) | 1401.2(5) | 24.3(3)      |
| O3          | 2027.6(11) | 7948.4(5) | 849.5(5)  | 26.4(3)      |
| O4          | 2066.2(11) | 7658.0(5) | 3128.8(5) | 21.9(3)      |
| O5          | 4239.0(11) | 7636.2(5) | 2560.5(5) | 21.5(3)      |
| O6          | 4015.9(11) | 7821.8(6) | 4921.2(5) | 26.5(3)      |
| O7          | 2407.2(11) | 6540.0(5) | 4047.6(5) | 22.6(3)      |
| O8          | 6464.4(12) | 5758.7(6) | 5602.6(6) | 36.2(3)      |
| N1          | 3265.0(12) | 7056.5(6) | 938.5(6)  | 19.6(3)      |
| N2          | 2410.6(13) | 8022.9(6) | 1736.3(6) | 21.2(3)      |
| N3          | 2246.9(12) | 7095.1(6) | 2496.3(5) | 18.3(3)      |
| N4          | 4818.3(12) | 7281.1(5) | 3350.7(5) | 17.1(3)      |
| N5          | 2785.5(12) | 7559.7(5) | 4229.6(5) | 16.7(3)      |

|     |             |            |            |         |
|-----|-------------|------------|------------|---------|
| N6  | 2351.2(12)  | 6470.7(6)  | 4935.9(6)  | 18.7(3) |
| C1  | 1140.6(17)  | 6113.8(8)  | 653.4(8)   | 28.9(4) |
| C2  | 1228(2)     | 5785.3(10) | 177.6(10)  | 43.2(6) |
| C3  | 45.3(18)    | 6401.5(9)  | 589.5(10)  | 39.7(5) |
| C4  | 1308(2)     | 5809.3(9)  | 1157.8(10) | 44.0(6) |
| C5  | 2350.6(15)  | 6790.8(7)  | 1021.7(7)  | 20.9(4) |
| C6  | 3590.3(14)  | 7478.0(7)  | 1275.4(6)  | 18.4(3) |
| C7  | 4573.9(15)  | 7753.4(7)  | 1071.5(7)  | 21.4(4) |
| C8  | 5704.7(15)  | 7499.3(7)  | 1169.9(7)  | 22.5(4) |
| C9  | 6182.0(16)  | 7389.5(8)  | 1682.2(7)  | 27.3(4) |
| C10 | 7236.5(17)  | 7171.6(9)  | 1777.8(8)  | 34.6(5) |
| C11 | 7845.1(18)  | 7065.3(11) | 1364.5(9)  | 44.2(6) |
| C12 | 7382.6(19)  | 7173.2(12) | 851.9(9)   | 46.7(6) |
| C13 | 6315.9(17)  | 7386.6(9)  | 756.1(8)   | 33.4(5) |
| C14 | 2598.1(15)  | 7837.7(7)  | 1270.5(7)  | 19.9(3) |
| C15 | 1429.4(17)  | 8342.8(8)  | 1770.2(7)  | 26.6(4) |
| C16 | 1722(2)     | 8886.7(9)  | 1721.2(9)  | 38.8(5) |
| C17 | 643(3)      | 9197(1)    | 1673.3(11) | 51.3(7) |
| C18 | -18(2)      | 9098(1)    | 2138.2(10) | 49.8(7) |
| C19 | -251.5(19)  | 8549.4(9)  | 2203.0(9)  | 36.8(5) |
| C20 | 847.4(16)   | 8245.0(7)  | 2267.4(7)  | 25.6(4) |
| C21 | 678.9(15)   | 7687.0(7)  | 2363.2(7)  | 22.5(4) |
| C22 | -310.8(16)  | 7564.0(8)  | 2676.4(8)  | 28.4(4) |
| C23 | -401.9(16)  | 7015.5(9)  | 2792.0(8)  | 31.8(4) |
| C24 | 1734.3(14)  | 7479.5(7)  | 2689.8(6)  | 18.6(3) |
| C25 | 3277.2(14)  | 6895.3(6)  | 2783.9(6)  | 17.4(3) |
| C26 | 3725.5(15)  | 6484.7(7)  | 2446.5(7)  | 21.3(4) |
| C27 | 4764.0(15)  | 6226.6(7)  | 2716.3(7)  | 20.8(4) |
| C28 | 4711.4(17)  | 5936.1(8)  | 3160.1(8)  | 27.9(4) |
| C29 | 5668.5(19)  | 5699.8(8)  | 3402.4(8)  | 33.5(5) |
| C30 | 6692.2(18)  | 5751.1(8)  | 3208.4(9)  | 33.8(5) |
| C31 | 6756.9(18)  | 6041.7(9)  | 2771.5(10) | 39.0(5) |
| C32 | 5795.7(18)  | 6274.7(8)  | 2523.5(9)  | 33.3(5) |
| C33 | 4152.0(14)  | 7309.3(6)  | 2889.7(6)  | 16.5(3) |
| C34 | 5718.4(14)  | 7635.0(7)  | 3524.3(6)  | 17.1(3) |
| C35 | 6875.3(15)  | 7391.0(7)  | 3516.7(7)  | 22.8(4) |
| C36 | 7832.3(15)  | 7738.1(8)  | 3730.0(8)  | 26.7(4) |
| C37 | 7673.5(15)  | 7907.3(8)  | 4284.2(8)  | 27.4(4) |
| C38 | 6542.3(15)  | 8172.3(7)  | 4282.3(8)  | 24.6(4) |
| C39 | 5548.7(14)  | 7838.0(6)  | 4072.1(6)  | 16.1(3) |
| C40 | 4354.2(14)  | 8080.6(6)  | 4056.2(6)  | 17.1(3) |
| C41 | 4345.9(16)  | 8634.3(7)  | 4180.0(8)  | 27.5(4) |
| C42 | 3151(2)     | 8843.9(9)  | 4111.0(12) | 43.6(6) |
| C43 | 3695.6(14)  | 7809.5(6)  | 4443.0(6)  | 16.6(3) |
| C44 | 2065.0(13)  | 7275.1(6)  | 4538.7(6)  | 16.1(3) |
| C45 | 813.3(14)   | 7385.9(7)  | 4335.6(7)  | 20.6(4) |
| C46 | -0.5(14)    | 7070.0(7)  | 4597.8(7)  | 22.5(4) |
| C47 | -179.9(16)  | 7149.4(8)  | 5118.5(8)  | 30.2(4) |
| C48 | -891.5(18)  | 6836.9(11) | 5360.1(9)  | 42.3(6) |
| C49 | -1433.1(18) | 6448.4(10) | 5083.0(11) | 46.5(6) |
| C50 | -1273.7(18) | 6374.0(9)  | 4565.0(11) | 41.8(6) |

|      |            |            |            |           |
|------|------------|------------|------------|-----------|
| C51  | -558.3(16) | 6680.6(8)  | 4322.3(9)  | 29.8(4)   |
| C52  | 2299.5(13) | 6723.4(6)  | 4481.9(6)  | 16.7(3)   |
| C53  | 2498.3(15) | 5936.9(7)  | 4977.4(7)  | 19.6(3)   |
| C54  | 1437.8(15) | 5692.9(7)  | 5144.3(8)  | 26.4(4)   |
| C55  | 1577.8(17) | 5133.2(8)  | 5190.9(9)  | 30.8(4)   |
| C56  | 2642.4(16) | 4994.6(7)  | 5557.5(8)  | 27.5(4)   |
| C57  | 3688.5(15) | 5244.1(7)  | 5383.6(7)  | 22.4(4)   |
| C58  | 3542.0(14) | 5804.4(7)  | 5369.3(7)  | 18.5(3)   |
| C59  | 4616.6(15) | 6082.1(6)  | 5253.6(7)  | 19.5(3)   |
| C60  | 4959.6(16) | 6014.1(7)  | 4700.3(7)  | 23.5(4)   |
| C61  | 5543.5(18) | 6475.0(8)  | 4527.8(9)  | 32.2(4)   |
| C62  | 5601.7(15) | 5959.1(7)  | 5675.0(7)  | 22.7(4)   |
| O9   | 5350(2)    | 6093.0(13) | 6153.7(7)  | 33.3(7)   |
| C63  | 6211(3)    | 6022.2(16) | 6608.4(12) | 38.2(8)   |
| C64  | 5598(3)    | 5885.4(10) | 7067.9(10) | 37.1(7)   |
| C65  | 5473(4)    | 5390.8(9)  | 7193.1(9)  | 50.6(9)   |
| C66  | 4844(4)    | 5259.0(7)  | 7595.3(9)  | 57.7(10)  |
| C67  | 4341(4)    | 5621.9(8)  | 7872.4(8)  | 53.2(10)  |
| C68  | 4465(3)    | 6116.5(8)  | 7747.2(11) | 44.6(8)   |
| C69  | 5094(3)    | 6248.3(8)  | 7344.9(12) | 37.7(7)   |
| O9A  | 5640(20)   | 6257(8)    | 6089(7)    | 38(3)     |
| C63A | 6460(20)   | 6167(14)   | 6558(8)    | 38(3)     |
| C64A | 5870(20)   | 5965(9)    | 7003(10)   | 38(3)     |
| C69A | 5330(30)   | 6307(7)    | 7290(13)   | 42(3)     |
| C68A | 4830(20)   | 6154(8)    | 7727(11)   | 46(3)     |
| C67A | 4870(30)   | 5661(8)    | 7877(8)    | 52(3)     |
| C66A | 5420(30)   | 5320(7)    | 7590(9)    | 53(3)     |
| C65A | 5920(30)   | 5472(9)    | 7154(9)    | 48(3)     |
| CI1  | -100.1(6)  | 5592.2(3)  | 3561.5(5)  | 79.5(3)   |
| CI2  | 1338.5(8)  | 5641.5(4)  | 2734.5(3)  | 77.5(3)   |
| CI3  | 2095.4(6)  | 5137.7(2)  | 3705.0(3)  | 50.97(16) |
| C70  | 1300(2)    | 5635.8(9)  | 3418.2(11) | 43.0(6)   |
| C71  | 6444(5)    | 9686(2)    | 4156(3)    | 88.5(19)  |
| C72  | 7099(4)    | 9521.9(17) | 3720(2)    | 63.3(12)  |
| C73  | 8258(4)    | 9328.2(18) | 3905(2)    | 50.5(10)  |
| C74  | 8905(5)    | 9133(2)    | 3473(2)    | 51.7(11)  |
| C75  | 10018(7)   | 8915(4)    | 3664(4)    | 50(3)     |
| C71A | 6785(18)   | 9614(10)   | 4580(9)    | 97(6)     |
| C72A | 7210(14)   | 9540(7)    | 4043(8)    | 63(3)     |
| C73A | 8417(15)   | 9335(7)    | 4085(7)    | 55(3)     |
| C74A | 8852(18)   | 9260(8)    | 3550(8)    | 57(3)     |
| C75A | 10060(20)  | 9056(11)   | 3597(12)   | 59(5)     |
| CI4B | 8432(5)    | 9359(2)    | 4308.4(15) | 65.4(15)  |
| CI6B | 9930(6)    | 8787(4)    | 3710(3)    | 48(2)     |
| CI5B | 7836(4)    | 9210(2)    | 3170.4(15) | 74.5(17)  |
| C71B | 8957(3)    | 9286(2)    | 3691.2(18) | 57(3)     |
| C76  | 8593(4)    | 5222(2)    | 1794(2)    | 79.6(19)  |
| C77  | 7908(3)    | 5330.4(19) | 1257.9(16) | 76.5(17)  |
| C78  | 6807(3)    | 5611.2(13) | 1302.4(13) | 55.3(12)  |
| C79  | 6114(3)    | 5722.0(19) | 768.6(14)  | 75.9(16)  |
| C80  | 5017(3)    | 6003(2)    | 818(2)     | 74.5(19)  |

|      |          |            |            |          |
|------|----------|------------|------------|----------|
| C17A | 8224(6)  | 4885.7(14) | 2027.3(16) | 120(2)   |
| C18A | 8500(4)  | 5902.8(10) | 1673.3(16) | 90.0(16) |
| C19A | 8509(4)  | 5084.6(14) | 922.3(15)  | 88.9(16) |
| C77A | 7958(3)  | 5307.8(11) | 1493.2(13) | 71(3)    |
| C17B | 4614(6)  | 5310(2)    | 310.5(17)  | 85(2)    |
| C18B | 4749(6)  | 5578(2)    | 1429.4(16) | 76(2)    |
| C19B | 5840(6)  | 6200.9(19) | 701(2)     | 86(2)    |
| C77B | 4684(4)  | 5802.9(15) | 772.1(16)  | 72(6)    |
| C19C | 4901(9)  | 5740(6)    | 1284(5)    | 83(2)    |
| C17C | 7359(9)  | 5600(6)    | 1424(4)    | 83(2)    |
| C18C | 6150(10) | 5751(5)    | 364(4)     | 83(2)    |
| C77C | 6196(8)  | 5894(3)    | 1046(4)    | 66(4)    |

**Table S69.** Anisotropic Displacement Parameters ( $\text{\AA}^2 \times 10^3$ ) for Gellman157. The Anisotropic displacement factor exponent takes the form:  $-2\pi^2[h^2a^*2U_{11}+2hka^*b^*U_{12}+\dots]$ .

| Atom | $U_{11}$ | $U_{22}$ | $U_{33}$ | $U_{23}$ | $U_{13}$ | $U_{12}$  |
|------|----------|----------|----------|----------|----------|-----------|
| O1   | 26.6(7)  | 32.7(8)  | 21.6(6)  | -7.6(5)  | 5.4(5)   | -9.8(6)   |
| O2   | 25.1(6)  | 32.4(7)  | 15.8(6)  | -1.8(5)  | 3.8(5)   | -5.0(5)   |
| O3   | 28.2(7)  | 34.5(8)  | 15.4(6)  | 4.8(5)   | -1.4(5)  | 7.0(6)    |
| O4   | 23.4(6)  | 27.6(7)  | 14.0(6)  | 0.4(5)   | 0.2(5)   | 3.6(5)    |
| O5   | 24.2(6)  | 25.1(7)  | 14.8(6)  | 4.9(5)   | 0.6(5)   | -2.5(5)   |
| O6   | 19.9(6)  | 45.5(9)  | 13.8(6)  | 0.4(5)   | 1.2(5)   | -8.0(6)   |
| O7   | 29.8(7)  | 21.3(7)  | 17.0(6)  | 1.2(5)   | 3.9(5)   | 1.2(5)    |
| O8   | 21.7(7)  | 49.1(10) | 38.1(8)  | 4.7(7)   | 5.4(6)   | 9.0(6)    |
| N1   | 20.2(7)  | 24.3(8)  | 14.6(7)  | -1.5(6)  | 3.1(5)   | -1.0(6)   |
| N2   | 25.0(8)  | 24.7(8)  | 13.5(7)  | 3.8(6)   | 0.9(6)   | 5.8(6)    |
| N3   | 17.2(7)  | 23.2(8)  | 13.6(6)  | 0.9(5)   | -1.8(5)  | 1.3(6)    |
| N4   | 18.2(7)  | 17.7(7)  | 14.9(7)  | 3.1(5)   | -0.2(5)  | -0.2(5)   |
| N5   | 17.3(7)  | 20.4(8)  | 12.1(6)  | 2.8(5)   | 0.7(5)   | -2.2(5)   |
| N6   | 22.0(7)  | 18.6(8)  | 15.2(7)  | 2.4(5)   | 1.8(5)   | 4.0(6)    |
| C1   | 29.5(10) | 29.0(11) | 28.2(10) | -2.2(8)  | 3.7(8)   | -9.9(8)   |
| C2   | 47.2(13) | 42.4(14) | 40.8(13) | -15(1)   | 8.7(10)  | -17.1(11) |
| C3   | 27.7(11) | 43.7(14) | 46.4(13) | -4.2(10) | -0.7(9)  | -8.4(9)   |
| C4   | 60.5(16) | 30.7(13) | 40.1(13) | 6(1)     | 4.0(11)  | -8.3(11)  |
| C5   | 21.8(8)  | 24.4(10) | 15.3(8)  | 1.0(7)   | -2.2(6)  | 0.5(7)    |
| C6   | 20.1(8)  | 21.2(9)  | 13.4(7)  | 1.5(6)   | 0.1(6)   | -0.4(7)   |
| C7   | 25.7(9)  | 21.1(9)  | 17.4(8)  | 3.3(6)   | 2.7(7)   | -3.2(7)   |
| C8   | 20.5(8)  | 25.8(10) | 21.1(9)  | 1.1(7)   | 1.6(7)   | -7.3(7)   |
| C9   | 23.5(9)  | 38.1(12) | 20.3(9)  | 1.2(8)   | 2.7(7)   | -4.5(8)   |
| C10  | 21.7(9)  | 55.9(14) | 25(1)    | 5.7(9)   | -1.7(8)  | -3.9(9)   |
| C11  | 18.5(10) | 77.1(19) | 36.6(12) | 2.5(12)  | 1.3(8)   | 6.9(10)   |
| C12  | 25.8(11) | 86(2)    | 28.9(11) | -2.0(12) | 6.6(9)   | 6.5(11)   |
| C13  | 24.3(10) | 55.9(14) | 19.7(9)  | 1.3(9)   | 1.5(7)   | -1.9(9)   |
| C14  | 21.3(8)  | 21.7(9)  | 16.2(8)  | 3.9(6)   | 0.7(6)   | -0.1(7)   |
| C15  | 31.2(10) | 29.8(11) | 18.6(9)  | 5.4(7)   | 3.0(7)   | 11.8(8)   |
| C16  | 53.0(14) | 30.7(12) | 35.0(11) | 10.3(9)  | 14.2(10) | 14.2(10)  |
| C17  | 70.1(18) | 38.0(14) | 49.2(15) | 17.7(11) | 21.1(13) | 27.7(13)  |
| C18  | 64.9(17) | 43.0(15) | 44.9(14) | 11.7(11) | 20.2(12) | 33.0(13)  |

|     |          |          |          |           |           |          |
|-----|----------|----------|----------|-----------|-----------|----------|
| C19 | 37.6(12) | 44.9(13) | 28.8(10) | 7.3(9)    | 7.2(9)    | 21.9(10) |
| C20 | 28.7(10) | 30.6(11) | 17.3(8)  | 2.3(7)    | 2.4(7)    | 11.4(8)  |
| C21 | 19.7(8)  | 32(1)    | 15.1(8)  | 0.1(7)    | -0.4(6)   | 6.8(7)   |
| C22 | 18.5(9)  | 42.2(12) | 24.5(9)  | 1.1(8)    | 2.1(7)    | 5.7(8)   |
| C23 | 20.1(9)  | 44.6(13) | 30.7(10) | 3.1(9)    | 3.1(8)    | -0.2(8)  |
| C24 | 17.0(8)  | 24.9(9)  | 14.0(8)  | 4.7(6)    | 2.4(6)    | 0.3(6)   |
| C25 | 18.1(8)  | 20.0(9)  | 13.6(7)  | 2.2(6)    | -0.1(6)   | 1.8(6)   |
| C26 | 24.7(9)  | 20.2(9)  | 18.1(8)  | -0.4(7)   | -1.0(7)   | 1.5(7)   |
| C27 | 24.2(9)  | 18.3(9)  | 19.3(8)  | -2.3(6)   | 0.3(7)    | 2.2(7)   |
| C28 | 27.6(10) | 30.4(11) | 26.3(9)  | 6.1(8)    | 6.0(8)    | 4.3(8)   |
| C29 | 36.3(11) | 35.7(12) | 28.2(10) | 10.5(8)   | 3.0(8)    | 9.2(9)   |
| C30 | 28.5(10) | 36.2(12) | 35.3(11) | 3.9(9)    | -1.4(8)   | 11.6(9)  |
| C31 | 25.9(10) | 43.2(13) | 49.4(13) | 10.1(10)  | 10.1(9)   | 6.3(9)   |
| C32 | 31(1)    | 34.1(12) | 36.1(11) | 13.1(9)   | 9.1(8)    | 5.5(8)   |
| C33 | 16.6(8)  | 19.0(9)  | 14.4(7)  | -0.2(6)   | 3.3(6)    | 4.0(6)   |
| C34 | 14.6(8)  | 21.1(9)  | 15.6(8)  | 2.6(6)    | 1.1(6)    | -0.3(6)  |
| C35 | 18.2(8)  | 31.4(10) | 19.1(8)  | -0.1(7)   | 3.5(7)    | 5.1(7)   |
| C36 | 15.1(8)  | 37.6(11) | 27.8(10) | 8.0(8)    | 3.8(7)    | 1.5(7)   |
| C37 | 16.2(8)  | 35.3(11) | 29.2(10) | -1.4(8)   | -3.1(7)   | -1.9(7)  |
| C38 | 18.5(8)  | 26.5(10) | 27.8(9)  | -3.8(7)   | -1.5(7)   | -2.3(7)  |
| C39 | 15.0(8)  | 18.3(9)  | 15.0(8)  | 2.4(6)    | 1.9(6)    | -0.7(6)  |
| C40 | 16.3(8)  | 19.2(9)  | 16.2(8)  | 2.2(6)    | 3.2(6)    | -0.3(6)  |
| C41 | 25.6(9)  | 19.6(10) | 38.9(11) | 0.7(8)    | 10.1(8)   | 0.3(7)   |
| C42 | 34.3(12) | 25.1(12) | 74.1(17) | 2.7(11)   | 17.6(11)  | 8.4(9)   |
| C43 | 15.1(8)  | 19.3(9)  | 15.5(8)  | 1.0(6)    | 2.8(6)    | 1.4(6)   |
| C44 | 14.6(8)  | 19.3(9)  | 14.2(7)  | 2.2(6)    | 0.9(6)    | -1.3(6)  |
| C45 | 15.8(8)  | 20.9(9)  | 24.6(9)  | 5.8(7)    | 1.0(7)    | 1.5(6)   |
| C46 | 12.6(8)  | 25(1)    | 29.4(9)  | 9.2(7)    | 0.6(7)    | 3.0(7)   |
| C47 | 19.5(9)  | 41.6(12) | 29.2(10) | 8.2(8)    | 1.7(7)    | 4.7(8)   |
| C48 | 24.2(10) | 68.5(17) | 35.4(12) | 21.9(11)  | 8.8(9)    | 8.4(10)  |
| C49 | 21(1)    | 54.9(16) | 64.5(16) | 31.1(13)  | 8.9(10)   | -3.6(10) |
| C50 | 24.3(10) | 36.2(13) | 64.2(16) | 11.9(11)  | 2.1(10)   | -9.5(9)  |
| C51 | 21.4(9)  | 28.4(11) | 39.1(11) | 5.8(8)    | 1.6(8)    | -1.9(8)  |
| C52 | 13.0(7)  | 20.1(9)  | 16.5(8)  | 2.1(6)    | 0.1(6)    | 0.1(6)   |
| C53 | 21.5(8)  | 18.3(9)  | 18.7(8)  | 4.5(6)    | 2.0(6)    | 1.6(7)   |
| C54 | 19.1(9)  | 29.2(11) | 30(1)    | 10.2(8)   | 0.0(7)    | 1.5(7)   |
| C55 | 23.6(9)  | 29.5(11) | 38.0(11) | 12.4(8)   | -1.8(8)   | -5.6(8)  |
| C56 | 25.4(9)  | 21.5(10) | 35(1)    | 12.9(8)   | 1.8(8)    | -1.0(7)  |
| C57 | 21.3(9)  | 19.4(9)  | 26.4(9)  | 5.6(7)    | 2.5(7)    | 1.7(7)   |
| C58 | 19.6(8)  | 20.2(9)  | 16.0(8)  | 2.8(6)    | 3.5(6)    | 2.6(6)   |
| C59 | 21.8(8)  | 14.6(8)  | 22.3(8)  | 1.4(6)    | 3.4(7)    | 1.7(6)   |
| C60 | 26.2(9)  | 20.6(10) | 25.2(9)  | 3.6(7)    | 8.8(7)    | 2.3(7)   |
| C61 | 31.3(10) | 32.2(12) | 34.3(11) | 8.3(8)    | 8.8(8)    | -4.7(8)  |
| C62 | 23.7(9)  | 15.6(9)  | 28.6(9)  | 0.8(7)    | 1.9(7)    | -1.2(7)  |
| O9  | 34.9(12) | 37.3(15) | 24.8(9)  | -8.1(8)   | -8.4(7)   | 17.6(10) |
| C63 | 38.6(16) | 40(2)    | 31.6(13) | -7.7(11)  | -14.0(11) | 14.2(13) |
| C64 | 46.9(18) | 33.6(16) | 26.5(13) | -6.2(10)  | -13.1(11) | 9.8(12)  |
| C65 | 70(2)    | 31.6(16) | 47.0(16) | -12.4(12) | -4.5(16)  | 8.5(15)  |
| C66 | 87(3)    | 32.7(16) | 51.2(17) | -3.8(12)  | 1.8(18)   | -4.0(16) |
| C67 | 77(3)    | 41.9(16) | 38.7(14) | -6.3(12)  | 1.0(15)   | -5.8(16) |
| C68 | 63(2)    | 37.3(15) | 31.2(13) | -8.1(11)  | -2.0(14)  | 3.1(14)  |



|      |          |          |          |          |          |           |
|------|----------|----------|----------|----------|----------|-----------|
| C69  | 51.4(19) | 27.3(13) | 30.8(15) | -5.2(10) | -8.8(13) | 7.4(12)   |
| O9A  | 41(6)    | 34(6)    | 35(5)    | -5(5)    | -13(5)   | 11(5)     |
| C63A | 42(5)    | 38(6)    | 31(5)    | -7(5)    | -13(5)   | 13(5)     |
| C64A | 47(5)    | 32(4)    | 30(4)    | -9(4)    | -11(4)   | 13(4)     |
| C69A | 53(5)    | 36(5)    | 33(5)    | -9(5)    | -10(5)   | 8(5)      |
| C68A | 64(5)    | 35(5)    | 36(5)    | -9(4)    | -3(5)    | 2(5)      |
| C67A | 74(5)    | 38(5)    | 42(5)    | -8(4)    | 0(5)     | -2(5)     |
| C66A | 75(6)    | 34(5)    | 49(5)    | -10(5)   | 1(5)     | 3(5)      |
| C65A | 64(6)    | 34(5)    | 42(5)    | -11(5)   | -5(5)    | 9(5)      |
| C11  | 48.2(4)  | 46.9(4)  | 150.3(9) | -34.8(5) | 39.2(5)  | -11.6(3)  |
| C12  | 84.3(6)  | 94.8(7)  | 50.3(4)  | 12.3(4)  | -4.3(4)  | -29.4(5)  |
| C13  | 67.1(4)  | 35.5(3)  | 49.8(3)  | -9.5(2)  | 5.6(3)   | 4.8(3)    |
| C70  | 40.0(13) | 32.3(13) | 56.9(15) | -6.4(10) | 6.5(11)  | -8.6(10)  |
| C71  | 70(3)    | 53(3)    | 146(6)   | -39(3)   | 32(4)    | -18(2)    |
| C72  | 52(2)    | 38(2)    | 99(4)    | -8(2)    | 8(2)     | -11.4(17) |
| C73  | 48(2)    | 39.7(19) | 63(3)    | -1.7(19) | 2.8(19)  | -18.5(16) |
| C74  | 52(2)    | 51(3)    | 51(2)    | -3.6(19) | 0.9(18)  | -9(2)     |
| C75  | 54(4)    | 57(6)    | 39(3)    | 23(3)    | 3(2)     | -2(3)     |
| C71A | 94(12)   | 69(11)   | 131(13)  | -10(12)  | 23(12)   | -15(10)   |
| C72A | 62(5)    | 43(5)    | 83(6)    | -3(5)    | 12(5)    | -16(5)    |
| C73A | 56(5)    | 43(5)    | 66(6)    | 0(6)     | 4(6)     | -11(5)    |
| C74A | 56(5)    | 52(5)    | 59(5)    | 2(5)     | 0(5)     | -9(5)     |
| C75A | 64(8)    | 59(9)    | 53(8)    | 18(8)    | -1(7)    | -8(8)     |
| C14B | 82(3)    | 54(3)    | 57(3)    | -15(2)   | -2(3)    | 1(2)      |
| C16B | 43(3)    | 49(4)    | 50(3)    | 9(3)     | -1(2)    | -6(2)     |
| C15B | 57(3)    | 108(4)   | 56(3)    | 13(3)    | -2(2)    | 23(3)     |
| C71B | 58(5)    | 50(5)    | 61(5)    | 3(5)     | 2(5)     | -9(5)     |
| C76  | 64(4)    | 80(4)    | 99(5)    | 19(4)    | 23(3)    | 31(3)     |
| C77  | 44(3)    | 76(4)    | 111(5)   | 19(3)    | 16(3)    | 1(3)      |
| C78  | 36(2)    | 58(3)    | 72(3)    | 6(2)     | 6(2)     | 15(2)     |
| C79  | 68(3)    | 89(4)    | 72(3)    | 8(3)     | 17(3)    | -2(3)     |
| C80  | 70(4)    | 47(4)    | 111(5)   | 23(3)    | 28(3)    | 31(3)     |
| C17A | 136(5)   | 89(4)    | 127(5)   | 43(3)    | -20(4)   | 5(3)      |
| C18A | 122(4)   | 52(2)    | 112(3)   | -11(2)   | 77(3)    | -13(2)    |
| C19A | 91(3)    | 69(3)    | 114(3)   | -38(2)   | 42(3)    | -50(2)    |
| C77A | 36(5)    | 85(6)    | 90(7)    | 17(6)    | 1(5)     | 7(5)      |
| C17B | 98(5)    | 82(4)    | 75(4)    | -18(3)   | 6(3)     | 12(4)     |
| C18B | 140(5)   | 58(3)    | 40(2)    | 7(2)     | 50(3)    | -28(3)    |
| C19B | 97(5)    | 65(4)    | 93(4)    | 1(3)     | -2(4)    | 5(3)      |
| C77B | 74(11)   | 44(11)   | 105(11)  | 30(10)   | 34(10)   | 23(9)     |

**Table S70.** Bond Lengths for Gellman157.

| Atom | Atom | Length/Å | Atom | Atom | Length/Å |
|------|------|----------|------|------|----------|
| O1   | C1   | 1.478(2) | C44  | C52  | 1.531(2) |
| O1   | C5   | 1.348(2) | C45  | C46  | 1.510(2) |
| O2   | C5   | 1.222(2) | C46  | C47  | 1.388(3) |
| O3   | C14  | 1.235(2) | C46  | C51  | 1.390(3) |
| O4   | C24  | 1.239(2) | C47  | C48  | 1.395(3) |

|     |     |          |      |      |           |
|-----|-----|----------|------|------|-----------|
| O5  | C33 | 1.234(2) | C48  | C49  | 1.383(4)  |
| O6  | C43 | 1.233(2) | C49  | C50  | 1.373(4)  |
| O7  | C52 | 1.236(2) | C50  | C51  | 1.390(3)  |
| O8  | C62 | 1.197(2) | C53  | C54  | 1.533(2)  |
| N1  | C5  | 1.345(2) | C53  | C58  | 1.539(2)  |
| N1  | C6  | 1.453(2) | C54  | C55  | 1.529(3)  |
| N2  | C14 | 1.334(2) | C55  | C56  | 1.527(3)  |
| N2  | C15 | 1.467(2) | C56  | C57  | 1.531(3)  |
| N3  | C24 | 1.333(2) | C57  | C58  | 1.528(3)  |
| N3  | C25 | 1.455(2) | C58  | C59  | 1.545(2)  |
| N4  | C33 | 1.337(2) | C59  | C60  | 1.529(2)  |
| N4  | C34 | 1.466(2) | C59  | C62  | 1.527(2)  |
| N5  | C43 | 1.336(2) | C60  | C61  | 1.521(3)  |
| N5  | C44 | 1.456(2) | C62  | O9   | 1.343(3)  |
| N6  | C52 | 1.340(2) | C62  | O9A  | 1.326(9)  |
| N6  | C53 | 1.459(2) | O9   | C63  | 1.464(3)  |
| C1  | C2  | 1.519(3) | C63  | C64  | 1.503(4)  |
| C1  | C3  | 1.512(3) | C64  | C65  | 1.3900    |
| C1  | C4  | 1.521(3) | C64  | C69  | 1.3900    |
| C6  | C7  | 1.534(2) | C65  | C66  | 1.3900    |
| C6  | C14 | 1.531(2) | C66  | C67  | 1.3900    |
| C7  | C8  | 1.506(3) | C67  | C68  | 1.3900    |
| C8  | C9  | 1.392(3) | C68  | C69  | 1.3900    |
| C8  | C13 | 1.389(3) | O9A  | C63A | 1.464(10) |
| C9  | C10 | 1.382(3) | C63A | C64A | 1.504(10) |
| C10 | C11 | 1.382(3) | C64A | C69A | 1.3900    |
| C11 | C12 | 1.386(3) | C64A | C65A | 1.3900    |
| C12 | C13 | 1.390(3) | C69A | C68A | 1.3900    |
| C15 | C16 | 1.523(3) | C68A | C67A | 1.3900    |
| C15 | C20 | 1.542(3) | C67A | C66A | 1.3900    |
| C16 | C17 | 1.529(3) | C66A | C65A | 1.3900    |
| C17 | C18 | 1.527(4) | C11  | C70  | 1.756(3)  |
| C18 | C19 | 1.525(4) | C12  | C70  | 1.751(3)  |
| C19 | C20 | 1.539(3) | C13  | C70  | 1.756(3)  |
| C20 | C21 | 1.549(3) | C71  | C72  | 1.503(8)  |
| C21 | C22 | 1.541(3) | C72  | C73  | 1.498(6)  |
| C21 | C24 | 1.527(2) | C73  | C74  | 1.514(7)  |
| C22 | C23 | 1.522(3) | C74  | C75  | 1.479(8)  |
| C25 | C26 | 1.542(2) | C71A | C72A | 1.5306    |
| C25 | C33 | 1.532(2) | C72A | C73A | 1.5336    |
| C26 | C27 | 1.511(2) | C73A | C74A | 1.5328    |
| C27 | C28 | 1.387(3) | C74A | C75A | 1.5312    |
| C27 | C32 | 1.386(3) | Cl4B | C71B | 1.7760    |
| C28 | C29 | 1.385(3) | Cl6B | C71B | 1.7765    |
| C29 | C30 | 1.379(3) | Cl5B | C71B | 1.7756    |
| C30 | C31 | 1.375(3) | C76  | C77  | 1.5326    |
| C31 | C32 | 1.390(3) | C77  | C78  | 1.5327    |
| C34 | C35 | 1.531(2) | C78  | C79  | 1.5329    |
| C34 | C39 | 1.539(2) | C79  | C80  | 1.5308    |
| C35 | C36 | 1.526(3) | Cl7A | C77A | 1.7773    |
| C36 | C37 | 1.521(3) | Cl8A | C77A | 1.7758    |

|     |     |          |      |      |        |
|-----|-----|----------|------|------|--------|
| C37 | C38 | 1.527(3) | Cl9A | C77A | 1.7760 |
| C38 | C39 | 1.534(2) | Cl7B | C77B | 1.7759 |
| C39 | C40 | 1.564(2) | Cl8B | C77B | 1.7770 |
| C40 | C41 | 1.534(3) | Cl9B | C77B | 1.7766 |
| C40 | C43 | 1.524(2) | Cl9C | C77C | 1.7767 |
| C41 | C42 | 1.522(3) | Cl7C | C77C | 1.7766 |
| C44 | C45 | 1.547(2) | Cl8C | C77C | 1.7775 |

**Table S71.** Bond Angles for Gellman157.

| Atom | Atom | Atom | Angle/°    | Atom | Atom | Atom | Angle/°    |
|------|------|------|------------|------|------|------|------------|
| C5   | O1   | C1   | 119.98(14) | N5   | C43  | C40  | 115.94(14) |
| C5   | N1   | C6   | 119.32(14) | N5   | C44  | C45  | 108.94(13) |
| C14  | N2   | C15  | 119.84(15) | N5   | C44  | C52  | 109.83(13) |
| C24  | N3   | C25  | 120.04(14) | C52  | C44  | C45  | 109.74(14) |
| C33  | N4   | C34  | 124.10(14) | C46  | C45  | C44  | 112.77(14) |
| C43  | N5   | C44  | 123.43(14) | C47  | C46  | C45  | 121.28(18) |
| C52  | N6   | C53  | 124.15(15) | C47  | C46  | C51  | 118.74(18) |
| O1   | C1   | C2   | 102.20(16) | C51  | C46  | C45  | 119.95(18) |
| O1   | C1   | C3   | 109.32(17) | C46  | C47  | C48  | 120.2(2)   |
| O1   | C1   | C4   | 110.54(17) | C49  | C48  | C47  | 120.5(2)   |
| C2   | C1   | C4   | 110.1(2)   | C50  | C49  | C48  | 119.5(2)   |
| C3   | C1   | C2   | 111.08(19) | C49  | C50  | C51  | 120.4(2)   |
| C3   | C1   | C4   | 113.07(19) | C50  | C51  | C46  | 120.6(2)   |
| O2   | C5   | O1   | 124.70(17) | O7   | C52  | N6   | 124.81(17) |
| O2   | C5   | N1   | 124.51(17) | O7   | C52  | C44  | 121.19(15) |
| N1   | C5   | O1   | 110.78(15) | N6   | C52  | C44  | 113.99(14) |
| N1   | C6   | C7   | 109.94(14) | N6   | C53  | C54  | 110.61(15) |
| N1   | C6   | C14  | 110.26(14) | N6   | C53  | C58  | 111.02(14) |
| C14  | C6   | C7   | 108.02(14) | C54  | C53  | C58  | 110.29(14) |
| C8   | C7   | C6   | 115.24(15) | C55  | C54  | C53  | 111.33(16) |
| C9   | C8   | C7   | 120.49(17) | C56  | C55  | C54  | 111.47(17) |
| C13  | C8   | C7   | 121.08(17) | C55  | C56  | C57  | 111.00(15) |
| C13  | C8   | C9   | 118.38(18) | C58  | C57  | C56  | 110.54(15) |
| C10  | C9   | C8   | 120.93(18) | C53  | C58  | C59  | 112.62(14) |
| C11  | C10  | C9   | 120.37(19) | C57  | C58  | C53  | 109.16(15) |
| C10  | C11  | C12  | 119.4(2)   | C57  | C58  | C59  | 113.17(14) |
| C11  | C12  | C13  | 120.1(2)   | C60  | C59  | C58  | 116.14(15) |
| C8   | C13  | C12  | 120.78(19) | C62  | C59  | C58  | 110.01(14) |
| O3   | C14  | N2   | 123.27(17) | C62  | C59  | C60  | 110.72(15) |
| O3   | C14  | C6   | 120.21(16) | C61  | C60  | C59  | 110.64(16) |
| N2   | C14  | C6   | 116.51(15) | O8   | C62  | C59  | 126.18(18) |
| N2   | C15  | C16  | 112.01(17) | O8   | C62  | O9   | 123.75(19) |
| N2   | C15  | C20  | 112.95(15) | O8   | C62  | O9A  | 116.8(10)  |
| C16  | C15  | C20  | 111.39(17) | O9   | C62  | C59  | 110.02(16) |
| C15  | C16  | C17  | 109.9(2)   | O9A  | C62  | C59  | 112.2(9)   |
| C18  | C17  | C16  | 110.56(19) | C62  | O9   | C63  | 118.2(2)   |
| C19  | C18  | C17  | 112.0(2)   | O9   | C63  | C64  | 106.8(2)   |
| C18  | C19  | C20  | 111.7(2)   | C65  | C64  | C63  | 119.56(19) |

|     |     |     |            |      |      |      |            |
|-----|-----|-----|------------|------|------|------|------------|
| C15 | C20 | C21 | 112.21(15) | C65  | C64  | C69  | 120.0      |
| C19 | C20 | C15 | 106.45(15) | C69  | C64  | C63  | 120.3(2)   |
| C19 | C20 | C21 | 114.51(17) | C64  | C65  | C66  | 120.0      |
| C22 | C21 | C20 | 114.55(16) | C67  | C66  | C65  | 120.0      |
| C24 | C21 | C20 | 109.34(15) | C66  | C67  | C68  | 120.0      |
| C24 | C21 | C22 | 105.59(14) | C69  | C68  | C67  | 120.0      |
| C23 | C22 | C21 | 112.91(16) | C68  | C69  | C64  | 120.0      |
| O4  | C24 | N3  | 122.03(16) | C62  | O9A  | C63A | 120.4(18)  |
| O4  | C24 | C21 | 119.92(16) | O9A  | C63A | C64A | 111(2)     |
| N3  | C24 | C21 | 118.00(15) | C69A | C64A | C63A | 116(2)     |
| N3  | C25 | C26 | 108.41(13) | C69A | C64A | C65A | 120.0      |
| N3  | C25 | C33 | 109.25(14) | C65A | C64A | C63A | 123(2)     |
| C33 | C25 | C26 | 110.57(14) | C64A | C69A | C68A | 120.0      |
| C27 | C26 | C25 | 113.60(14) | C67A | C68A | C69A | 120.0      |
| C28 | C27 | C26 | 121.16(17) | C66A | C67A | C68A | 120.0      |
| C32 | C27 | C26 | 120.48(17) | C67A | C66A | C65A | 120.0      |
| C32 | C27 | C28 | 118.35(17) | C66A | C65A | C64A | 120.0      |
| C29 | C28 | C27 | 120.60(19) | Cl1  | C70  | Cl3  | 109.83(14) |
| C30 | C29 | C28 | 120.61(19) | Cl2  | C70  | Cl1  | 110.53(15) |
| C31 | C30 | C29 | 119.32(19) | Cl2  | C70  | Cl3  | 110.05(14) |
| C30 | C31 | C32 | 120.2(2)   | C73  | C72  | C71  | 114.5(5)   |
| C27 | C32 | C31 | 120.87(19) | C72  | C73  | C74  | 115.3(4)   |
| O5  | C33 | N4  | 123.31(16) | C75  | C74  | C73  | 114.6(5)   |
| O5  | C33 | C25 | 121.22(15) | C71A | C72A | C73A | 113.3      |
| N4  | C33 | C25 | 115.45(14) | C74A | C73A | C72A | 113.8      |
| N4  | C34 | C35 | 109.87(14) | C75A | C74A | C73A | 113.2      |
| N4  | C34 | C39 | 109.55(13) | Cl4B | C71B | Cl6B | 111.2      |
| C35 | C34 | C39 | 112.68(14) | Cl5B | C71B | Cl4B | 111.2      |
| C36 | C35 | C34 | 111.32(16) | Cl5B | C71B | Cl6B | 111.2      |
| C37 | C36 | C35 | 110.13(15) | C76  | C77  | C78  | 113.3      |
| C36 | C37 | C38 | 110.52(15) | C77  | C78  | C79  | 113.8      |
| C37 | C38 | C39 | 111.48(16) | C80  | C79  | C78  | 113.3      |
| C34 | C39 | C40 | 110.39(13) | Cl8A | C77A | Cl7A | 111.2      |
| C38 | C39 | C34 | 110.26(14) | Cl8A | C77A | Cl9A | 111.2      |
| C38 | C39 | C40 | 114.92(14) | Cl9A | C77A | Cl7A | 111.2      |
| C41 | C40 | C39 | 115.78(14) | Cl7B | C77B | Cl8B | 111.2      |
| C43 | C40 | C39 | 108.71(13) | Cl7B | C77B | Cl9B | 111.2      |
| C43 | C40 | C41 | 108.74(14) | Cl9B | C77B | Cl8B | 111.1      |
| C42 | C41 | C40 | 111.77(17) | Cl9C | C77C | Cl8C | 111.2      |
| O6  | C43 | N5  | 123.59(15) | Cl7C | C77C | Cl9C | 111.1      |
| O6  | C43 | C40 | 120.46(15) | Cl7C | C77C | Cl8C | 111.2      |

**Table S72.** Torsion Angles for Gellman157.

| <b>A</b> | <b>B</b> | <b>C</b> | <b>D</b> | <b>Angle/°</b> | <b>A</b> | <b>B</b> | <b>C</b> | <b>D</b> | <b>Angle/°</b> |
|----------|----------|----------|----------|----------------|----------|----------|----------|----------|----------------|
| O8       | C62      | O9       | C63      | 4.6(4)         | C35      | C34      | C39      | C38      | 52.15(19)      |
| O8       | C62      | O9A      | C63A     | -29(3)         | C35      | C34      | C39      | C40      | -179.80(14)    |
| N1       | C6       | C7       | C8       | -73.71(19)     | C35      | C36      | C37      | C38      | -59.0(2)       |
| N1       | C6       | C14      | O3       | -44.8(2)       | C36      | C37      | C38      | C39      | 58.7(2)        |

|     |     |     |     |             |     |     |     |      |             |
|-----|-----|-----|-----|-------------|-----|-----|-----|------|-------------|
| N1  | C6  | C14 | N2  | 136.23(16)  | C37 | C38 | C39 | C34  | -54.5(2)    |
| N2  | C15 | C16 | C17 | 171.31(18)  | C37 | C38 | C39 | C40  | -179.98(15) |
| N2  | C15 | C20 | C19 | -171.72(18) | C38 | C39 | C40 | C41  | 7.9(2)      |
| N2  | C15 | C20 | C21 | -45.7(2)    | C38 | C39 | C40 | C43  | -114.79(16) |
| N3  | C25 | C26 | C27 | -176.76(15) | C39 | C34 | C35 | C36  | -53.8(2)    |
| N3  | C25 | C33 | O5  | -37.0(2)    | C39 | C40 | C41 | C42  | 175.37(17)  |
| N3  | C25 | C33 | N4  | 144.67(14)  | C39 | C40 | C43 | O6   | 64.9(2)     |
| N4  | C34 | C35 | C36 | -176.22(14) | C39 | C40 | C43 | N5   | -114.09(16) |
| N4  | C34 | C39 | C38 | 174.79(14)  | C41 | C40 | C43 | O6   | -61.9(2)    |
| N4  | C34 | C39 | C40 | -57.16(17)  | C41 | C40 | C43 | N5   | 119.06(17)  |
| N5  | C44 | C45 | C46 | 174.47(15)  | C43 | N5  | C44 | C45  | 135.17(17)  |
| N5  | C44 | C52 | O7  | -43.7(2)    | C43 | N5  | C44 | C52  | -104.61(18) |
| N5  | C44 | C52 | N6  | 137.46(14)  | C43 | C40 | C41 | C42  | -61.9(2)    |
| N6  | C53 | C54 | C55 | -179.88(15) | C44 | N5  | C43 | O6   | 0.3(3)      |
| N6  | C53 | C58 | C57 | -177.81(14) | C44 | N5  | C43 | C40  | 179.26(15)  |
| N6  | C53 | C58 | C59 | -51.23(19)  | C44 | C45 | C46 | C47  | 72.6(2)     |
| C1  | O1  | C5  | O2  | -1.2(3)     | C44 | C45 | C46 | C51  | -105.21(19) |
| C1  | O1  | C5  | N1  | 178.08(16)  | C45 | C44 | C52 | O7   | 76.04(19)   |
| C5  | O1  | C1  | C2  | -175.28(18) | C45 | C44 | C52 | N6   | -102.81(16) |
| C5  | O1  | C1  | C3  | 67.0(2)     | C45 | C46 | C47 | C48  | -176.71(18) |
| C5  | O1  | C1  | C4  | -58.1(2)    | C45 | C46 | C51 | C50  | 177.33(18)  |
| C5  | N1  | C6  | C7  | -174.13(15) | C46 | C47 | C48 | C49  | -0.6(3)     |
| C5  | N1  | C6  | C14 | -55.1(2)    | C47 | C46 | C51 | C50  | -0.6(3)     |
| C6  | N1  | C5  | O1  | 172.10(14)  | C47 | C48 | C49 | C50  | -0.6(3)     |
| C6  | N1  | C5  | O2  | -8.6(3)     | C48 | C49 | C50 | C51  | 1.1(4)      |
| C6  | C7  | C8  | C9  | -59.3(2)    | C49 | C50 | C51 | C46  | -0.6(3)     |
| C6  | C7  | C8  | C13 | 123.3(2)    | C51 | C46 | C47 | C48  | 1.2(3)      |
| C7  | C6  | C14 | O3  | 75.4(2)     | C52 | N6  | C53 | C54  | -113.71(18) |
| C7  | C6  | C14 | N2  | -103.62(18) | C52 | N6  | C53 | C58  | 123.51(17)  |
| C7  | C8  | C9  | C10 | -177.77(19) | C52 | C44 | C45 | C46  | 54.20(19)   |
| C7  | C8  | C13 | C12 | 176.9(2)    | C53 | N6  | C52 | O7   | -2.6(3)     |
| C8  | C9  | C10 | C11 | 1.0(4)      | C53 | N6  | C52 | C44  | 176.24(14)  |
| C9  | C8  | C13 | C12 | -0.5(3)     | C53 | C54 | C55 | C56  | 54.1(2)     |
| C9  | C10 | C11 | C12 | -0.9(4)     | C53 | C58 | C59 | C60  | -56.7(2)    |
| C10 | C11 | C12 | C13 | 0.0(4)      | C53 | C58 | C59 | C62  | 176.52(15)  |
| C11 | C12 | C13 | C8  | 0.7(4)      | C54 | C53 | C58 | C57  | 59.22(19)   |
| C13 | C8  | C9  | C10 | -0.3(3)     | C54 | C53 | C58 | C59  | -174.20(15) |
| C14 | N2  | C15 | C16 | -92.8(2)    | C54 | C55 | C56 | C57  | -54.3(2)    |
| C14 | N2  | C15 | C20 | 140.47(18)  | C55 | C56 | C57 | C58  | 57.6(2)     |
| C14 | C6  | C7  | C8  | 165.94(15)  | C56 | C57 | C58 | C53  | -59.77(19)  |
| C15 | N2  | C14 | O3  | 5.3(3)      | C56 | C57 | C58 | C59  | 173.96(15)  |
| C15 | N2  | C14 | C6  | -175.75(16) | C57 | C58 | C59 | C60  | 67.7(2)     |
| C15 | C16 | C17 | C18 | 55.5(3)     | C57 | C58 | C59 | C62  | -59.08(19)  |
| C15 | C20 | C21 | C22 | -154.14(16) | C58 | C53 | C54 | C55  | -56.7(2)    |
| C15 | C20 | C21 | C24 | 87.59(18)   | C58 | C59 | C60 | C61  | 148.94(16)  |
| C16 | C15 | C20 | C19 | 61.2(2)     | C58 | C59 | C62 | O8   | 117.9(2)    |
| C16 | C15 | C20 | C21 | -172.81(16) | C58 | C59 | C62 | O9   | -59.9(3)    |
| C16 | C17 | C18 | C19 | -53.8(3)    | C58 | C59 | C62 | O9A  | -87.7(16)   |
| C17 | C18 | C19 | C20 | 56.5(3)     | C59 | C62 | O9  | C63  | -177.6(2)   |
| C18 | C19 | C20 | C15 | -58.3(2)    | C59 | C62 | O9A | C63A | 173.6(16)   |
| C18 | C19 | C20 | C21 | 177.09(17)  | C60 | C59 | C62 | O8   | -11.8(3)    |

|     |     |     |     |             |      |      |      |      |            |
|-----|-----|-----|-----|-------------|------|------|------|------|------------|
| C19 | C20 | C21 | C22 | -32.7(2)    | C60  | C59  | C62  | O9   | 170.4(2)   |
| C19 | C20 | C21 | C24 | -150.92(16) | C60  | C59  | C62  | O9A  | 142.6(16)  |
| C20 | C15 | C16 | C17 | -61.1(2)    | C62  | C59  | C60  | C61  | -84.68(19) |
| C20 | C21 | C22 | C23 | -176.37(16) | C62  | O9   | C63  | C64  | -145.0(3)  |
| C20 | C21 | C24 | O4  | 57.7(2)     | C62  | O9A  | C63A | C64A | -106(3)    |
| C20 | C21 | C24 | N3  | -124.73(17) | O9   | C62  | O9A  | C63A | 83(3)      |
| C22 | C21 | C24 | O4  | -66.0(2)    | O9   | C63  | C64  | C65  | 95.6(2)    |
| C22 | C21 | C24 | N3  | 111.54(18)  | O9   | C63  | C64  | C69  | -80.2(2)   |
| C24 | N3  | C25 | C26 | -175.50(15) | C63  | C64  | C65  | C66  | -175.8(2)  |
| C24 | N3  | C25 | C33 | -54.93(19)  | C63  | C64  | C69  | C68  | 175.8(2)   |
| C24 | C21 | C22 | C23 | -56.0(2)    | C64  | C65  | C66  | C67  | 0.0        |
| C25 | N3  | C24 | O4  | -4.7(3)     | C65  | C64  | C69  | C68  | 0.0        |
| C25 | N3  | C24 | C21 | 177.85(15)  | C65  | C66  | C67  | C68  | 0.0        |
| C25 | C26 | C27 | C28 | 66.9(2)     | C66  | C67  | C68  | C69  | 0.0        |
| C25 | C26 | C27 | C32 | -113.2(2)   | C67  | C68  | C69  | C64  | 0.0        |
| C26 | C25 | C33 | O5  | 82.22(19)   | C69  | C64  | C65  | C66  | 0.0        |
| C26 | C25 | C33 | N4  | -96.10(17)  | O9A  | C62  | O9   | C63  | -78(2)     |
| C26 | C27 | C28 | C29 | 179.74(19)  | O9A  | C63A | C64A | C69A | -80(3)     |
| C26 | C27 | C32 | C31 | 179.5(2)    | O9A  | C63A | C64A | C65A | 104(3)     |
| C27 | C28 | C29 | C30 | 0.3(3)      | C63A | C64A | C69A | C68A | -176(2)    |
| C28 | C27 | C32 | C31 | -0.6(3)     | C63A | C64A | C65A | C66A | 176(2)     |
| C28 | C29 | C30 | C31 | 0.3(4)      | C64A | C69A | C68A | C67A | 0.0        |
| C29 | C30 | C31 | C32 | -1.0(4)     | C69A | C64A | C65A | C66A | 0.0        |
| C30 | C31 | C32 | C27 | 1.2(4)      | C69A | C68A | C67A | C66A | 0.0        |
| C32 | C27 | C28 | C29 | -0.1(3)     | C68A | C67A | C66A | C65A | 0.0        |
| C33 | N4  | C34 | C35 | -109.53(18) | C67A | C66A | C65A | C64A | 0.0        |
| C33 | N4  | C34 | C39 | 126.17(16)  | C65A | C64A | C69A | C68A | 0.0        |
| C33 | C25 | C26 | C27 | 63.49(19)   | C71  | C72  | C73  | C74  | 176.6(4)   |
| C34 | N4  | C33 | O5  | 0.8(3)      | C72  | C73  | C74  | C75  | -176.4(6)  |
| C34 | N4  | C33 | C25 | 179.05(14)  | C71A | C72A | C73A | C74A | -179.9     |
| C34 | C35 | C36 | C37 | 56.5(2)     | C72A | C73A | C74A | C75A | -180.0     |
| C34 | C39 | C40 | C41 | -117.53(16) | C76  | C77  | C78  | C79  | -180.0     |
| C34 | C39 | C40 | C43 | 119.76(15)  | C77  | C78  | C79  | C80  | -179.9     |

**Table S73.** Hydrogen Atom Coordinates ( $\text{\AA}\times 10^4$ ) and Isotropic Displacement Parameters ( $\text{\AA}^2\times 10^3$ ) for Gellman157.

| Atom | x    | y    | z    | U(eq) |
|------|------|------|------|-------|
| H1   | 3662 | 6976 | 683  | 24    |
| H2   | 2874 | 7953 | 2022 | 25    |
| H3   | 1962 | 6962 | 2194 | 22    |
| H4   | 4709 | 7035 | 3563 | 21    |
| H5   | 2612 | 7568 | 3884 | 20    |
| H6   | 2293 | 6637 | 5227 | 22    |
| H2A  | 1153 | 5987 | -144 | 65    |
| H2B  | 623  | 5538 | 151  | 65    |
| H2C  | 1964 | 5619 | 219  | 65    |
| H3A  | 28   | 6623 | 892  | 60    |
| H3B  | -594 | 6172 | 572  | 60    |

---

|      |       |      |      |    |
|------|-------|------|------|----|
| H3C  | -8    | 6596 | 264  | 60 |
| H4A  | 2079  | 5677 | 1209 | 66 |
| H4B  | 764   | 5536 | 1131 | 66 |
| H4C  | 1188  | 6019 | 1459 | 66 |
| H6A  | 3827  | 7362 | 1645 | 22 |
| H7A  | 4386  | 7805 | 686  | 26 |
| H7B  | 4642  | 8083 | 1240 | 26 |
| H9   | 5777  | 7465 | 1970 | 33 |
| H10  | 7545  | 7094 | 2130 | 41 |
| H11  | 8574  | 6920 | 1431 | 53 |
| H12  | 7795  | 7101 | 566  | 56 |
| H13  | 6001  | 7456 | 403  | 40 |
| H15  | 864   | 8261 | 1459 | 32 |
| H16A | 2115  | 8937 | 1406 | 47 |
| H16B | 2237  | 8992 | 2036 | 47 |
| H17A | 841   | 9551 | 1665 | 62 |
| H17B | 165   | 9116 | 1339 | 62 |
| H18A | 417   | 9224 | 2466 | 60 |
| H18B | -746  | 9279 | 2083 | 60 |
| H19A | -751  | 8430 | 1890 | 44 |
| H19B | -651  | 8501 | 2517 | 44 |
| H20  | 1348  | 8379 | 2578 | 31 |
| H21  | 561   | 7513 | 2015 | 27 |
| H22A | -210  | 7748 | 3014 | 34 |
| H22B | -1026 | 7677 | 2473 | 34 |
| H23A | -454  | 6830 | 2460 | 48 |
| H23B | -1080 | 6955 | 2964 | 48 |
| H23C | 269   | 6909 | 3026 | 48 |
| H25  | 3107  | 6754 | 3127 | 21 |
| H26A | 3120  | 6237 | 2358 | 26 |
| H26B | 3908  | 6630 | 2111 | 26 |
| H28  | 4013  | 5899 | 3299 | 33 |
| H29  | 5619  | 5501 | 3705 | 40 |
| H30  | 7346  | 5587 | 3375 | 41 |
| H31  | 7461  | 6083 | 2639 | 47 |
| H32  | 5847  | 6469 | 2218 | 40 |
| H34  | 5659  | 7917 | 3269 | 21 |
| H35A | 6914  | 7087 | 3734 | 27 |
| H35B | 6969  | 7296 | 3150 | 27 |
| H36A | 8567  | 7566 | 3737 | 32 |
| H36B | 7840  | 8028 | 3495 | 32 |
| H37A | 8297  | 8133 | 4419 | 33 |
| H37B | 7699  | 7618 | 4523 | 33 |
| H38A | 6535  | 8471 | 4059 | 30 |
| H38B | 6453  | 8278 | 4646 | 30 |
| H39  | 5564  | 7549 | 4316 | 19 |
| H40  | 3946  | 8032 | 3693 | 21 |
| H41A | 4694  | 8689 | 4548 | 33 |
| H41B | 4807  | 8811 | 3943 | 33 |
| H42A | 2806  | 8792 | 3746 | 65 |
| H42B | 3180  | 9198 | 4189 | 65 |

---

---

|      |       |      |      |     |
|------|-------|------|------|-----|
| H42C | 2700  | 8676 | 4353 | 65  |
| H44  | 2224  | 7372 | 4919 | 19  |
| H45A | 656   | 7738 | 4401 | 25  |
| H45B | 686   | 7330 | 3949 | 25  |
| H47  | 183   | 7417 | 5311 | 36  |
| H48  | -1005 | 6891 | 5718 | 51  |
| H49  | -1912 | 6234 | 5250 | 56  |
| H50  | -1655 | 6111 | 4371 | 50  |
| H51  | -449  | 6624 | 3965 | 36  |
| H53  | 2617  | 5807 | 4622 | 23  |
| H54A | 1287  | 5829 | 5489 | 32  |
| H54B | 780   | 5770 | 4881 | 32  |
| H55A | 908   | 4990 | 5329 | 37  |
| H55B | 1621  | 4992 | 4836 | 37  |
| H56A | 2743  | 4632 | 5555 | 33  |
| H56B | 2556  | 5097 | 5923 | 33  |
| H57A | 4364  | 5157 | 5632 | 27  |
| H57B | 3808  | 5124 | 5028 | 27  |
| H58  | 3379  | 5909 | 5728 | 22  |
| H59  | 4457  | 6442 | 5292 | 23  |
| H60A | 5477  | 5728 | 4699 | 28  |
| H60B | 4279  | 5945 | 4447 | 28  |
| H61A | 5826  | 6413 | 4189 | 48  |
| H61B | 6178  | 6560 | 4795 | 48  |
| H61C | 5003  | 6749 | 4488 | 48  |
| H63A | 6649  | 6330 | 6686 | 46  |
| H63B | 6740  | 5756 | 6536 | 46  |
| H65  | 5817  | 5143 | 7004 | 61  |
| H66  | 4759  | 4921 | 7681 | 69  |
| H67  | 3911  | 5532 | 8147 | 64  |
| H68  | 4121  | 6365 | 7937 | 54  |
| H69  | 5179  | 6586 | 7259 | 45  |
| H63C | 6844  | 6479 | 6671 | 46  |
| H63D | 7034  | 5928 | 6471 | 46  |
| H69A | 5296  | 6644 | 7187 | 51  |
| H68A | 4453  | 6387 | 7922 | 55  |
| H67A | 4531  | 5557 | 8175 | 62  |
| H66A | 5452  | 4982 | 7693 | 64  |
| H65A | 6295  | 5239 | 6958 | 57  |
| H70  | 1637  | 5950 | 3571 | 52  |
| H71A | 5681  | 9786 | 4006 | 133 |
| H71B | 6830  | 9967 | 4342 | 133 |
| H71C | 6395  | 9414 | 4405 | 133 |
| H72A | 6663  | 9261 | 3514 | 76  |
| H72B | 7169  | 9804 | 3481 | 76  |
| H73A | 8189  | 9060 | 4162 | 61  |
| H73B | 8706  | 9596 | 4093 | 61  |
| H74A | 8437  | 8880 | 3270 | 62  |
| H74B | 9019  | 9407 | 3228 | 62  |
| H75A | 10382 | 8801 | 3362 | 75  |
| H75B | 9915  | 8636 | 3897 | 75  |

---



|      |       |      |      |     |
|------|-------|------|------|-----|
| H75C | 10496 | 9165 | 3860 | 75  |
| H71D | 6039  | 9771 | 4529 | 146 |
| H71E | 7316  | 9825 | 4802 | 146 |
| H71F | 6730  | 9293 | 4752 | 146 |
| H72C | 7184  | 9860 | 3856 | 75  |
| H72D | 6694  | 9310 | 3829 | 75  |
| H73C | 8931  | 9565 | 4300 | 66  |
| H73D | 8441  | 9015 | 4273 | 66  |
| H74C | 8340  | 9030 | 3334 | 68  |
| H74D | 8830  | 9580 | 3361 | 68  |
| H75D | 10277 | 9003 | 3244 | 89  |
| H75E | 10090 | 8741 | 3788 | 89  |
| H75F | 10579 | 9291 | 3791 | 89  |
| H71G | 9372  | 9594 | 3620 | 68  |
| H76A | 9190  | 4983 | 1748 | 119 |
| H76B | 8092  | 5085 | 2035 | 119 |
| H76C | 8934  | 5528 | 1943 | 119 |
| H77A | 7724  | 5015 | 1072 | 92  |
| H77B | 8380  | 5527 | 1042 | 92  |
| H78A | 6992  | 5927 | 1489 | 66  |
| H78B | 6338  | 5414 | 1519 | 66  |
| H79A | 6582  | 5919 | 551  | 91  |
| H79B | 5926  | 5407 | 582  | 91  |
| H80A | 4855  | 6228 | 518  | 112 |
| H80B | 5102  | 6193 | 1148 | 112 |
| H80C | 4393  | 5768 | 821  | 112 |
| H77C | 7120  | 5338 | 1405 | 85  |
| H77D | 3974  | 6000 | 696  | 87  |
| H77E | 6305  | 6259 | 1086 | 79  |

**Table S74.** Atomic Occupancy for Gellman157.

| <b>Atom</b> | <b>Occupancy</b> | <b>Atom</b> | <b>Occupancy</b> | <b>Atom</b> | <b>Occupancy</b> |
|-------------|------------------|-------------|------------------|-------------|------------------|
| O9          | 0.893(10)        | C63         | 0.893(10)        | H63A        | 0.893(10)        |
| H63B        | 0.893(10)        | C64         | 0.893(10)        | C65         | 0.893(10)        |
| H65         | 0.893(10)        | C66         | 0.893(10)        | H66         | 0.893(10)        |
| C67         | 0.893(10)        | H67         | 0.893(10)        | C68         | 0.893(10)        |
| H68         | 0.893(10)        | C69         | 0.893(10)        | H69         | 0.893(10)        |
| O9A         | 0.107(10)        | C63A        | 0.107(10)        | H63C        | 0.107(10)        |
| H63D        | 0.107(10)        | C64A        | 0.107(10)        | C69A        | 0.107(10)        |
| H69A        | 0.107(10)        | C68A        | 0.107(10)        | H68A        | 0.107(10)        |
| C67A        | 0.107(10)        | H67A        | 0.107(10)        | C66A        | 0.107(10)        |
| H66A        | 0.107(10)        | C65A        | 0.107(10)        | H65A        | 0.107(10)        |
| C71         | 0.687(3)         | H71A        | 0.687(3)         | H71B        | 0.687(3)         |
| H71C        | 0.687(3)         | C72         | 0.687(3)         | H72A        | 0.687(3)         |
| H72B        | 0.687(3)         | C73         | 0.687(3)         | H73A        | 0.687(3)         |
| H73B        | 0.687(3)         | C74         | 0.687(3)         | H74A        | 0.687(3)         |
| H74B        | 0.687(3)         | C75         | 0.687(3)         | H75A        | 0.687(3)         |
| H75B        | 0.687(3)         | H75C        | 0.687(3)         | C71A        | 0.155(3)         |

|      |            |      |            |      |            |
|------|------------|------|------------|------|------------|
| H71D | 0.155(3)   | H71E | 0.155(3)   | H71F | 0.155(3)   |
| C72A | 0.155(3)   | H72C | 0.155(3)   | H72D | 0.155(3)   |
| C73A | 0.155(3)   | H73C | 0.155(3)   | H73D | 0.155(3)   |
| C74A | 0.155(3)   | H74C | 0.155(3)   | H74D | 0.155(3)   |
| C75A | 0.155(3)   | H75D | 0.155(3)   | H75E | 0.155(3)   |
| H75F | 0.155(3)   | Cl4B | 0.1582(19) | Cl6B | 0.1582(19) |
| Cl5B | 0.1582(19) | C71B | 0.1582(19) | H71G | 0.1582(19) |
| C76  | 0.559(2)   | H76A | 0.559(2)   | H76B | 0.559(2)   |
| H76C | 0.559(2)   | C77  | 0.559(2)   | H77A | 0.559(2)   |
| H77B | 0.559(2)   | C78  | 0.559(2)   | H78A | 0.559(2)   |
| H78B | 0.559(2)   | C79  | 0.559(2)   | H79A | 0.559(2)   |
| H79B | 0.559(2)   | C80  | 0.559(2)   | H80A | 0.559(2)   |
| H80B | 0.559(2)   | H80C | 0.559(2)   | Cl7A | 0.2213(17) |
| Cl8A | 0.2213(17) | Cl9A | 0.2213(17) | C77A | 0.2213(17) |
| H77C | 0.2213(17) | Cl7B | 0.1463(17) | Cl8B | 0.1463(17) |
| Cl9B | 0.1463(17) | C77B | 0.1463(17) | H77D | 0.1463(17) |
| Cl9C | 0.0738(17) | Cl7C | 0.0738(17) | Cl8C | 0.0738(17) |
| C77C | 0.0738(17) | H77E | 0.0738(17) |      |            |
